# Supplementary material for: Protein Phosphatase 2A Improves Cardiac Functional Response to Ischemia and Sepsis
Source: MDPI journal article supplement (doi:10.3390/ijms23094688), 2022-04-23
Supplement: s1 [file s1]

2

|                                                                                                                                                                                                                                                                                                                                                                                                      |            |            |           |           |            |     |            |            |      |
|------------------------------------------------------------------------------------------------------------------------------------------------------------------------------------------------------------------------------------------------------------------------------------------------------------------------------------------------------------------------------------------------------|------------|------------|-----------|-----------|------------|-----|------------|------------|------|
| gBm_0200101.1/DB_XREF=gi:9910117 GEN=Og51 FEAF=FLmRNA CNT=2027 ID=Mm.140158.1 TIER=FL+Slack STK=42 UG=Mm.140158 ILL=13121 DEF=Mus musculus cyclochrome P450, 51 (Cyp51) mRNA, PROD=cyclochrome P450, 51 (Cyp-51) gb-NM_020010.1 gb-AB02662.1                                                                                                                                                         | 249.43335  | 21.021502  | 382.69998 | 132.06241 | 1.7261136  | 2.0 | 0.2264687  | 0.31300554 | 1.53 |
| gBm_008748.1/DB_XREF=gi:3679155 GEN=Np17 FEAF=FLmRNA CNT=537 ID=Mm.39725.1 TIER=FL+Slack STK=19 UG=Mm.39725 ILL=18218 DEF=Mus musculus neuronal tyrosinekinase phosphatase 1 (Ntp1), mRNA, PROD=neuronal tyrosinekinase phosphatase 1 /FL-gb-NM_008748.1                                                                                                                                             | 348.2333   | 198.05476  | 573.56665 | 165.27673 | 1.5129963  | 3.0 | 0.22748737 | 0.31187785 | 1.65 |
| gBm_016542.1/DB_XREF=gi:12855327 FEAF=FLmRNA CNT=471 ID=Mm.27207.2 TIER=ConsEnd STK=17 UG=Mm.27207 ILL=74386 UG_GENE=403242N15R UG_TITLE=RIKEN cDNA 12000439.11 gene /DEF=Mus musculus adult male testis cDNA, RIKEN full-length enriched library, clone.493243N11 homolog to CDNA FLJ12888 FIS, CLONE NT2P2004081, full insert sequence.                                                            | 429.73337  | 246.08824  | 673.56665 | 83.53874  | 1.6250961  | 2.0 | 0.24564427 | 0.33407623 | 1.57 |
| gBm_019182.1/DB_XREF=gi:9790228 GEN=Sir1 FEAF=FLmRNA CNT=977 ID=Mm.12804.1 TIER=FL+Slack STK=20 UG=Mm.12804 ILL=93759 DEF=Mus musculus sir1un 1 (silent mating type information regulation 2, homolog) 1 (S. cerevisiae) (Sir1), mRNA, PROD=sir1un 1 (silent mating type information regulation 2, homolog) 1 (S. cerevisiae) /FL-gb-NM_019182.1 gb-AF74466.1                                        | 559.0      | 300.70676  | 850.0334  | 76.42424  | 1.6246833  | 2.0 | 0.24572687 | 0.33153623 | 1.52 |
| gBm_0006828.1/DB_XREF=gi:13905085 FEAF=FLmRNA CNT=583 ID=Mm.30501.1 TIER=FL+Slack STK=18 UG=Mm.30501 DEF=Mus musculus, Similar to microtubillar-associated protein 3, clone MGC-11870 IMAGE:3597878, mRNA, complete cds, /PROD=Similar to microtubillar-associated protein 3 /FL-gb-B006828.1                                                                                                        | 539.26666  | 346.3587   | 886.5     | 140.9129  | 1.6084077  | 2.0 | 0.24901208 | 0.33332327 | 1.64 |
| gBm_0027196.1/DB_XREF=gi:20071133 FEAF=FLmRNA CNT=203 ID=Mm.34411.1 TIER=FL+Slack STK=128 UG=Mm.34411 DEF=Mus musculus, Similar to pyruvate dehydrogenase kinase, isoenzyme 1, clone MGC-28719 IMAGE:4458562, mRNA, complete cds, /PROD=Similar to pyruvate dehydrogenase kinase isoenzyme 1 /FL-gb-B0027196.1                                                                                       | 1481.2001  | 424.4901   | 2639.0334 | 1182.8103 | 1.5958194  | 2.0 | 0.25159192 | 0.33414552 | 1.78 |
| gBm_0200493.1/DB_XREF=gi:38101863 GEN=Np2e FEAF=FLmRNA CNT=1707 ID=Mm.143741.1 TIER=FL+Slack STK=87 UG=Mm.143741 ILL=56741 DEF=Mus musculus neighbor of Punc E11 (Nep), mRNA, PROD=neighbor of Punc e11 protein /FL-gb-AF176994.1 gb-AB052620.1                                                                                                                                                      | 650.63336  | 374.27472  | 1000.5667 | 210.0922  | 1.4121382  | 3.0 | 0.25276536 | 0.33310163 | 1.54 |
| gBm_020043.1/DB_XREF=gi:15488700 FEAF=FLmRNA CNT=277 ID=Mm.104747.9 TIER=ConsEnd STK=0 UG=Mm.104747 ILL=16114 UG_GENE=igk-V28 DEF=Mus musculus, clone IMAGE:4219819, mRNA, partial cds, /PROD=Unknown (protein for IMAGE:4219819)                                                                                                                                                                    | 2536.7     | 1346.0999  | 5748.767  | 3229.9329 | 1.5899211  | 2.0 | 0.2528125  | 0.33060095 | 2.27 |
| gBm_0013777.1/DB_XREF=gi:15489363 FEAF=FLmRNA CNT=967 ID=Mm.821.1 TIER=FL+Slack STK=47 UG=Mm.821 ILL=57806 UG_GENE=SnrpA1 DEF=Mus musculus, clone MGC-6296 IMAGE:2651704, mRNA, complete cds, /PROD=Unknown (protein for MGC-6296) /FL-gb-AF230356.1 gb-B0013777.1                                                                                                                                   | 1188.9333  | 536.97046  | 1902.2999 | 693.9675  | 1.4081479  | 3.0 | 0.2538262  | 0.3293928  | 1.60 |
| gBm_0010691.1/DB_XREF=gi:13278617 FEAF=FLmRNA CNT=177 ID=Mm.167102.1 TIER=FL+Slack STK=17 UG=Mm.167102 ILL=16211 UG_GENE=Impn8 DEF=Mus musculus, clone MGC-8315 IMAGE:3594201, mRNA, complete cds, /PROD=Unknown (protein for MGC-8315) /FL-gb-B0010691.1                                                                                                                                            | 2197.7332  | 580.041    | 3536.7668 | 1344.1012 | 1.5842928  | 2.0 | 0.2539843  | 0.327101   | 1.61 |
| gBm_025706.1/DB_XREF=gi:13385163 GEN=443240K22R FEAF=FLmRNA CNT=2322 ID=Mm.22252.1 TIER=FL+Slack STK=137 UG=Mm.22252 ILL=66887 DEF=Mus musculus RIKEN cDNA 443240K22R, clone (443240K22R), mRNA, PROD=RIKEN cDNA 443240K22 /FL-gb-NM_025706.1                                                                                                                                                        | 2074.0334  | 925.5119   | 3127.4668 | 926.4323  | 1.3933324  | 3.0 | 0.25780717 | 0.32952797 | 1.51 |
| gBm_007139.1/DB_XREF=gi:36771705 FEAF=FLmRNA CNT=532 ID=Mm.1584.1 TIER=FL+Slack STK=17 UG=Mm.1584 ILL=12419 DEF=Mus musculus CD141 antigen (Cd141), mRNA, PROD=CD141 antigen /FL-gb-NM_007139.1 gb-M3695.1                                                                                                                                                                                           | 295.33334  | 122.077934 | 463.53336 | 170.89987 | 1.3871365  | 3.0 | 0.25949186 | 0.32920608 | 1.57 |
| gBm_0004089.1/DB_XREF=gi:12855997 FEAF=FLmRNA CNT=2117 ID=Mm.22178.1 TIER=Slack STK=28 UG=Mm.22178 ILL=47846 UG_GENE=403200618R UG_TITLE=RIKEN cDNA 12000439.11 gene /DEF=Mus musculus adult male lung cDNA, RIKEN full-length enriched library, clone.120000618 homolog to CDNA14, full insert sequence, /FL-gb-B0004089.1 gb-B000685.1                                                             | 963.0      | 467.03268  | 1549.3334 | 564.1123  | 1.3867055  | 3.0 | 0.25960946 | 0.32691562 | 1.61 |
| gBm_002060.1/DB_XREF=gi:18606207 FEAF=FLmRNA CNT=1917 ID=Mm.44176.1 TIER=Slack STK=17 UG=Mm.44176 DEF=Mus musculus, Similar to EGF-containing fibulin-like extracellular matrix protein 1, clone IMAGE:5357328, mRNA, partial cds, /PROD=Similar to EGF-containing fibulin-likeextracellular matrix protein 1 /FL-gb-B002060.1                                                                       | 1247.9333  | 767.05914  | 1964.3334 | 217.40591 | 1.5563558  | 2.0 | 0.25990483 | 0.32488105 | 1.57 |
| gBm_138756.1/DB_XREF=gi:20270292 GEN=BC008171 FEAF=FLmRNA CNT=117 ID=Mm.135837.1 TIER=FL+Slack STK=7 UG=Mm.135837 ILL=192287 DEF=Mus musculus hypothetical protein BC008171 (BC008171), mRNA, PROD=hypothetical protein BC008171 /FL-gb-NM_138756.1 gb-BC008171.1                                                                                                                                    | 509.66666  | 159.7224   | 845.7     | 344.3217  | 1.5334098  | 2.0 | 0.26489997 | 0.328708   | 1.66 |
| gBm_08787946.1/DB_XREF=gi:16956442 DB_XREF=BB871946 CLONE=434302D66 FEAF=FLmRNA CNT=81 ID=Mm.93759.1 TIER=Slack STK=52 UG=Mm.93759 ILL=7106 UG_GENE=2610209N15R UG_TITLE=RIKEN cDNA 2610209N15 gene /DEF=Mus musculus 10 days embryo whole body cDNA, RIKEN full-length enriched library, clone.2610209N15 homolog to ANDROGEN-REGULATED SHORT-CHAIN DEHYDROGENASEREDUCTASE 1, full insert sequence. | 190.93333  | 87.15917   | 290.1     | 93.40991  | 1.3444291  | 3.0 | 0.27142897 | 0.33436903 | 1.52 |
| gBm_08855441.1/DB_XREF=gi:3643807 DB_XREF=BB855441 CLONE=4330028F09 FEAF=EST CNT=167 ID=Mm.58104.2 TIER=Slack STK=18 UG=Mm.58104 ILL=104 UG_GENE=Mus musculus, clone MGC-27940 IMAGE:3587176, mRNA, complete cds                                                                                                                                                                                     | 417.86667  | 174.88164  | 709.2     | 334.79416 | 1.3359292  | 3.0 | 0.27387375 | 0.33495352 | 1.70 |
| gBm_001189.1/DB_XREF=gi:12848371 FEAF=FLmRNA CNT=747 ID=Mm.27121.1 TIER=Slack STK=22 UG=Mm.27121 ILL=70851 UG_GENE=2610209N15R UG_TITLE=RIKEN cDNA 2610209N15 gene /DEF=Mus musculus 10 days embryo whole body cDNA, RIKEN full-length enriched library, clone.2610209N15 homolog to ANDROGEN-REGULATED SHORT-CHAIN DEHYDROGENASEREDUCTASE 1, full insert sequence.                                  | 173.5      | 96.886734  | 260.03336 | 27.103933 | 1.4897667  | 2.0 | 0.27474177 | 0.333615   | 1.50 |
| gBm_009140.1/DB_XREF=gi:9877884 GEN=Scg2 FEAF=FLmRNA CNT=747 ID=Mm.49179.1 TIER=FL+Slack STK=9 UG=Mm.49179 ILL=20310 DEF=Mus musculus small inducible cytokine subfamily, member 2 (Scg2), mRNA, PROD=small inducible cytokine subfamily, member 2 /FL-gb-NM_009140.1                                                                                                                                | 214.16667  | 104.578705 | 363.33334 | 165.20993 | 1.32137    | 3.0 | 0.27811554 | 0.33531663 | 1.70 |
| gBm_030412.1/DB_XREF=gi:13447397 GEN=Mail-pending FEAF=FLmRNA CNT=3171 ID=Mm.3732.1 TIER=FL+Slack STK=14 UG=Mm.3732 ILL=80859 DEF=Mus musculus molecule possessing ankryn-repeats induced by lipopolysaccharide (Mail-pending), mRNA, PROD=molecule possessing ankryn-repeats induced by lipopolysaccharide /FL-gb-NM_030412.1 gb-AB020974.1                                                         | 536.0333   | 98.96349   | 869.8333  | 379.71127 | 1.4734068  | 2.0 | 0.27854982 | 0.33347514 | 1.62 |
| gBm_002068.1/DB_XREF=gi:18433537 FEAF=FLmRNA CNT=171 ID=Mm.17262.1 TIER=FL+Slack STK=16 UG=Mm.17262 ILL=16232 DEF=Mus musculus, Similar to RIKEN cDNA 9530053H05 gene, clone MGC-28371 IMAGE:4020866, mRNA, complete cds, /PROD=Similar to RIKEN cDNA 9530053H05 gene /FL-gb-B002068.1                                                                                                               | 610.4333   | 222.68494  | 1039.9    | 463.5047  | 1.4465678  | 2.0 | 0.28494188 | 0.3387421  | 1.70 |
| gBm_001240.1/DB_XREF=gi:15214587 FEAF=FLmRNA CNT=2271 ID=Mm.45217.1 TIER=FL+Slack STK=13 UG=Mm.45217 DEF=Mus musculus, clone MGC-12154 IMAGE:3710576, mRNA, complete cds, /PROD=Unknown (protein for MGC-12154) /FL-gb-B001240.1                                                                                                                                                                     | 386.70004  | 56.796032  | 588.3     | 236.07414 | 1.4380835  | 2.0 | 0.28700063 | 0.3388202  | 1.52 |
| gBm_01289.1/DB_XREF=gi:12856417 FEAF=FLmRNA CNT=2427 ID=Mm.23242.1 TIER=Slack STK=21 UG=Mm.23242 ILL=71408 UG_GENE=5430405D20R UG_TITLE=RIKEN cDNA 5430405D20 gene /DEF=Mus musculus 6 days neonate head cDNA, RIKEN full-length enriched library, clone.5430405D20 uncassifiable transcript, full insert sequence.                                                                                  | 851.36664  | 218.27292  | 1371.7666 | 598.14606 | 1.4156123  | 2.0 | 0.29254377 | 0.34298235 | 1.61 |
| gBm_011050.1/DB_XREF=gi:3718357 GEN=H2 FEAF=FLmRNA CNT=2771 ID=Mm.21389.1 TIER=FL+Slack STK=16 UG=Mm.21389 ILL=13371 DEF=Mus musculus deiodinase, iodothyronine, type II (Dio2), mRNA, PROD=deiodinase, iodothyronine, type II /FL-gb-AF171196.1 gb-NM_010500.1                                                                                                                                      | 400.40002  | 176.28194  | 767.9666  | 442.2855  | 1.3921314  | 2.0 | 0.2984789  | 0.34754393 | 1.92 |
| gBm_0030137.1/DB_XREF=gi:15240675.1 FEAF=FLmRNA CNT=747 ID=Mm.196130.1 TIER=FL+Slack STK=9 UG=Mm.196130 ILL=88788 UG_GENE=1110050F08R DEF=Mus musculus, Similar to RIKEN cDNA 6530403A03 gene, clone MGC-20356 IMAGE:5038605, mRNA, complete cds, /PROD=Similar to RIKEN cDNA 6530403A03 gene /FL-gb-B0021443.1                                                                                      | 509.43335  | 135.68286  | 814.93335 | 355.3257  | 1.3911959  | 2.0 | 0.29871845 | 0.34545672 | 1.60 |
| gBm_002085.1/DB_XREF=gi:199713455 FEAF=FLmRNA CNT=1131 ID=Mm.33792.1 TIER=FL+Slack STK=4 UG=Mm.33792 ILL=20425 UG_GENE=Shrmt1 DEF=Mus musculus, serine hydroxymethyl transferase 1 (soluble), clone MGC-14007 IMAGE:4165579, mRNA, complete cds, /PROD=serine hydroxymethyl transferase 1 (soluble) /FL-gb-AF23702.1 gb-B002085.1                                                                    | 459.9      | 176.8502   | 1045.8334 | 731.91003 | 1.3478124  | 2.0 | 0.31009194 | 0.3561867  | 2.27 |
| gBm_134130.1/DB_XREF=gi:19527359 GEN=Lab33-pending FEAF=FLmRNA CNT=443 ID=Mm.7100.1 TIER=FL+Slack STK=33 UG=Mm.7100 ILL=106861 DEF=Mus musculus lung alphabeta hydrolase 3 (Lab33-pending), mRNA, PROD=lung alphabeta hydrolase 3 /FL-gb-AF429302.1 gb-NM_134130.1                                                                                                                                   | 176.59999  | 29.163845  | 311.63333 | 175.77275 | 1.3126625  | 2.0 | 0.31969804 | 0.36475617 | 1.76 |
| gBm_025959.1/DB_XREF=gi:13385449 GEN=Z300001E01R FEAF=FLmRNA CNT=1160 ID=Mm.18472.1 TIER=FL+Slack STK=36 UG=Mm.18472 ILL=67089 DEF=Mus musculus RIKEN cDNA Z300001E01 gene (Z300001E01R), mRNA, PROD=RIKEN cDNA Z300001E01 /FL-gb-NM_025959.1                                                                                                                                                        | 2173.4001  | 478.3655   | 3294.8665 | 1436.6143 | 1.2828438  | 2.0 | 0.32813188 | 0.3718828  | 1.52 |
| gBm_0418885.1/DB_XREF=gi:2681850 DB_XREF=Hw46077 CLONE=162320084 FEAF=EST CNT=1147 ID=Mm.920953.2 TIER=Slack STK=9 UG=Mm.920953 ILL=1016 UG_GENE=2610209N15R UG_TITLE=RIKEN cDNA 2610209N15 gene /DEF=Mus musculus 10 days embryo whole body cDNA, RIKEN full-length enriched library, clone.2610209N15 homolog to ANDROGEN-REGULATED SHORT-CHAIN DEHYDROGENASEREDUCTASE 1, full insert sequence.    | 840.73334  | 59.36046   | 1457.7001 | 844.5047  | 1.2622637  | 2.0 | 0.33410957 | 0.37614986 | 1.73 |
| gBm_008540.1/DB_XREF=gi:667871 GEN=Madr4 FEAF=FLmRNA CNT=2007 ID=Mm.100399.1 TIER=FL+Slack STK=9 UG=Mm.100399 ILL=17128 DEF=Mus musculus MAD homolog 4 (Drosophila) (Madr4), mRNA, PROD=MAD homolog 4 (Drosophila) /FL-gb-UG97481.1 gb-NM_008540.1                                                                                                                                                   | 1135.6666  | 320.7318   | 1741.6333 | 773.355   | 1.2536227  | 2.0 | 0.33665836 | 0.3765258  | 1.53 |
| gBm_0010687.1/DB_XREF=gi:15240675.1 FEAF=FLmRNA CNT=747 ID=Mm.196130.1 TIER=FL+Slack STK=9 UG=Mm.196130 ILL=88788 UG_GENE=1110050F08R DEF=Mus musculus, Similar to RIKEN cDNA 6530403A03 gene, clone MGC-20356 IMAGE:5038605, mRNA, complete cds, /PROD=Similar to RIKEN cDNA 6530403A03 gene /FL-gb-B0021443.1                                                                                      | 742.43335  | 501.58264  | 2092.5    | 1830.8022 | 1.2318512  | 2.0 | 0.34318385 | 0.38131538 | 2.82 |
| gBm_004674.1/DB_XREF=gi:13455593 FEAF=FLmRNA CNT=195 ID=Mm.28028.1 TIER=FL+Slack STK=130 UG=Mm.28028 DEF=Mus musculus, Similar to RNA binding motif protein 10, clone MGC-7826 IMAGE:3500403, mRNA, complete cds, /PROD=Similar to RNA binding motif protein 10 /FL-gb-B0040674.1                                                                                                                    | 659.73334  | 137.62909  | 991.30005 | 453.94376 | 1.2106925  | 2.0 | 0.3496703  | 0.38599968 | 1.50 |
| gBm_0007159.1/DB_XREF=gi:13938088 FEAF=FLmRNA CNT=1771 ID=Mm.212861.1 TIER=FL+Slack STK=17 UG=Mm.212861 DEF=Mus musculus, Similar to L1 repeat, T1 subfamily, member 30, clone MGC-7372 IMAGE:3487559, mRNA, complete cds, /PROD=Similar to L1 repeat, T1 subfamily, member 30 /FL-gb-B0007159.1                                                                                                     | 744.03326  | 325.80676  | 2445.2    | 2433.6653 | 1.2000223  | 2.0 | 0.35299635 | 0.3871573  | 3.29 |
| gBm_0007159.1/DB_XREF=gi:13938088 FEAF=FLmRNA CNT=1771 ID=Mm.212861.1 TIER=FL+Slack STK=17 UG=Mm.212861 DEF=Mus musculus, Similar to L1 repeat, T1 subfamily, member 30, clone MGC-7372 IMAGE:3487559, mRNA, complete cds, /PROD=Similar to L1 repeat, T1 subfamily, member 30 /FL-gb-B0007159.1                                                                                                     | 705.5      | 321.25174  | 2421.8333 | 2482.401  | 1.1876372  | 2.0 | 0.35690385 | 0.3889337  | 3.43 |
| gBm_0007159.1/DB_XREF=gi:16741597 FEAF=FLmRNA CNT=2337 ID=Mm.58104.1 TIER=FL+Slack STK=24 UG=Mm.58104 DEF=Mus musculus, clone MGC-27940 IMAGE:3587176, mRNA, complete cds, /PROD=Unknown (protein for MGC-27940) /FL-gb-B016603.1                                                                                                                                                                    | 231.76666  | 63.020744  | 363.66666 | 201.21635 | 1.0834839  | 2.0 | 0.39183238 | 0.42427713 | 1.57 |
| gBm_015765.1/DB_XREF=gi:7857199 GEN=Hsp70-4 FEAF=FLmRNA CNT=967 ID=Mm.89341.1 TIER=FL+Slack STK=57 UG=Mm.89341 ILL=59497 DEF=Mus musculus heat shock protein, 70 kDa 4 (Hsp70-4), mRNA, PROD=heat shock protein, 70 kDa 4 /FL-gb-B002056.1 gb-U08215.1 gb-NM_015765.1                                                                                                                                | 154.3      | 103.89836  | 243.10002 | 121.09827 | 0.96393424 | 2.0 | 0.40618578 | 0.43703532 | 1.58 |
| gBm_0007826.1/DB_XREF=gi:12841627 FEAF=FLmRNA CNT=537 ID=Mm.157783.14 TIER=Slack STK=27 UG=Mm.157783 ILL=104911 UG_GENE=AB93585 UG_TITLE=expressed sequence AB93585 /DEF=Mus musculus 10 day old male pancreas cDNA, RIKEN full-length enriched library, clone.101049117 immunoglobulin heavy chain, (J55) family, full insert sequence.                                                             | 536.60004  | 343.23163  | 1281.9667 | 1260.6519 | 0.98811466 | 2.0 | 0.42725167 | 0.45680997 | 2.39 |
| gBm_0007474.1/DB_XREF=gi:13938364 FEAF=FLmRNA CNT=4037 ID=Mm.140785.1 TIER=FL+Slack STK=156 UG=Mm.140785 ILL=20249 UG_GENE=Scd1 DEF=Mus musculus, stearoyl-Coenzyme A desaturase 1, clone MGC-6427 IMAGE:3599032, mRNA, complete cds, /PROD=stearoyl-Coenzyme A desaturase 1 /FL-gb-B007474.1 gb-NM_009127.1                                                                                         | 6781.533   | 901.3425   | 11328.734 | 8234.607  | 0.95077056 | 2.0 | 0.44206956 | 0.4696989  | 1.67 |
| gBm_012427.1/DB_XREF=gi:12891932 FEAF=FLmRNA CNT=2771 ID=Mm.21389.1 TIER=FL+Slack STK=16 UG=Mm.21389 ILL=13371 DEF=Mus musculus ubiquitin C, /DEF=Mus musculus 11 days embryo whole body cDNA, RIKEN full-length enriched library, clone.2700054004 homolog to POLYUBIQUITIN UBC (SIMILAR TO UBIQUITIN C), full insert sequence.                                                                     | 1015.76666 | 444.64703  | 1562.2001 | 960.1859  | 0.8944442  | 2.0 | 0.46547025 | 0.49149033 | 1.54 |
| gBm_010684.1/DB_XREF=gi:3754847 FEAF=FLmRNA CNT=3807 ID=Mm.22478.1 TIER=FL+Slack STK=149 UG=Mm.22478 ILL=16688 UG_GENE=2610209N15R UG_TITLE=RIKEN cDNA 2610209N15 gene /DEF=Mus musculus 10 days embryo whole body cDNA, RIKEN full-length enriched library, clone.2610209N15 homolog to ANDROGEN-REGULATED SHORT-CHAIN DEHYDROGENASEREDUCTASE 1, full insert sequence.                              | 497.56665  | 5.105219   | 883.39996 | 751.11115 | 0.8897052  | 2.0 | 0.46749777 | 0.49058408 | 1.78 |
| gBm_002078.1/DB_XREF=gi:16351882 DB_XREF=BB204720 CLONE=4340059G022 FEAF=FLmRNA CNT=747 ID=Mm.152434.2 TIER=Slack STK=16 UG=Mm.152434 ILL=104 UG_GENE=Mus musculus, Similar to RIKEN cDNA 1700660C05 gene, clone MGC-29125 IMAGE:3980327, mRNA, complete cds, /FL-gb-B002078.1                                                                                                                       | 416.06668  | 181.6803   | 901.2     | 929.3317  | 0.88737375 | 2.0 | 0.4684986  | 0.48861817 | 2.17 |
| gBm_134051.1/DB_XREF=gi:19527267 GEN=AB93585 FEAF=FLmRNA CNT=373 ID=Mm.157783.1 TIER=FL+Slack STK=2 UG=Mm.157783 ILL=104911 DEF=Mus musculus expressed sequence AB93585 (AB93585), mRNA, PROD=expressed sequence AB93585 /FL-gb-NM_134051.1 gb-B0013488.1                                                                                                                                            | 1823.8334  | 1609.4973  | 5154.1665 | 6440.4775 | 0.8689117  | 2.0 | 0.47650295 | 0.493936   | 2.83 |
| gBm_0019425.1/DB_XREF=gi:18943870 FEAF=FLmRNA CNT=515 ID=Mm.157783.1 TIER=FL+Slack STK=17 UG=Mm.157783 ILL=104911 UG_GENE=AB93585 DEF=Mus musculus, clone MGC-30346 IMAGE:4459683, mRNA, complete cds, /PROD=Unknown (protein for MGC-30346) /FL-gb-B019425.1                                                                                                                                        | 893.8333   | 797.18445  | 2621.0002 | 3428.4812 | 0.8498838  | 2.0 | 0.48490024 | 0.4995942  | 2.93 |
| gBm_0412703.1/DB_XREF=gi:9937086 FEAF=FLmRNA CNT=4037 ID=Mm.140785.1 TIER=                                                                                                                                                                                                                                                                                                                           |            |            |           |           |            |     |            |            |      |
