# Supplementary material for: Protein Phosphatase 2A Improves Cardiac Functional Response to Ischemia and Sepsis
Source: MDPI journal article supplement (doi:10.3390/ijms23094688), 2022-04-23
Supplement: s1 [file s1]

**Supplementary Table S2.** Cardiac gene expression. A GeneChip Mouse Genome 430 2.0 Array (Affymetrix, Santa Clara, CA, United States) was used to analyze the basal mRNA expression in hearts from PP2A-TG (n=3) and WT (n=3) mice. Here, only genes are shown that were expressed in both PP2A-TG and WT and with a 1.5-fold or higher down-regulation in PP2A-TG. For analysis, the TM4 application MeV was used (Saeed et al., 2003) and analyzed by a t-Test (Welch approximation; alpha (overall threshold p-value): 0.05; P-values based on t-distribution). Data are sorted by p value.

| Gene descriptions                                                                                                                                                                                                                                                                                                                                                                                            | WT mean   | WT SD     | PP2A-TG mean | PP2A-TG SD | Absolute t value | Degrees of freedom | Adj p value  | False discovery rate | PP2A-TG / WT | WT / PP2A-TG |
|--------------------------------------------------------------------------------------------------------------------------------------------------------------------------------------------------------------------------------------------------------------------------------------------------------------------------------------------------------------------------------------------------------------|-----------|-----------|--------------|------------|------------------|--------------------|--------------|----------------------|--------------|--------------|
| gb.BC019117.1/DB_XREF=gi:5172286/FEA=FlmRNA/ CNT=92/ TID=Mm.27932/1/ TIER=FL+Stack/ STK=39/ UG=Mm.27932/ UG_GENE=Ansf2-pending/DEF=Mus musculus, clone MGC-29432 IMAGE:3709664, mRNA, complete cds. /PROD=Unknown (protein for MGC-29432) /FL-gb:BC019117.1 gb.NM.031405.1                                                                                                                                   | 838.2334  | 46.69404  | 477.6        | 51.20811   | 9.013391         | 3.0                | 0.0028832927 | 1.0524018            | 0.57         | 1.76         |
| gb.AK004894.1/DB_XREF=gi:12834243/FEA=mrRNA/ CNT=70/ TID=Mm.1183.1/ TIER=Stack/ STK=31/ UG=Mm.1183/ LL=74153/ UG_GENE=130004C08Rik/ UG_TITLE=RIKEN cDNA 130004C08 gene/DEF=Mus musculus adult male liver cDNA, RIKEN full-length enriched library, clone:130004C08-UBE1L (FRAGMENT), full insert sequence.                                                                                                   | 610.3333  | 7.245238  | 400.9        | 19.546862  | 17.401026        | 2.0                | 0.003286286  | 0.5997472            | 0.66         | 1.52         |
| gb.BC025144.1/DB_XREF=gi:19264066/FEA=FlmRNA/ CNT=27/ TID=Mm.219658.1/ TIER=FL+Stack/ STK=17/ UG=Mm.219658/DEF=Mus musculus, Similar to GTP binding protein 5 (putative), clone MGC:36295 IMAGE:4483303, mRNA, complete cds. /PROD=Similar to GTP binding protein 5 (putative) /FL-gb:BC025144.1                                                                                                             | 627.4666  | 47.652325 | 374.16666    | 36.395786  | 7.316819         | 3.0                | 0.0052728374 | 0.64152855           | 0.6          | 1.68         |
| gb.U11548.1/DB_XREF=gi:511226/FEA=FlmRNA/ CNT=8/ TID=Mm.28587.1/ TIER=FL/ STK=1/ UG=Mm.28587/ LL=26407/ UG_GENE=Map3k4/DEF=Mus musculus TfIIi-associated transactivator factor p17 mRNA, complete cds. /PROD=TfIIi-associated transactivator factor p17 /FL-gb:U85608.1 gb.U11548.1 gb.NM.011948.1                                                                                                           | 500.83334 | 49.23366  | 250.59999    | 36.55603   | 7.0680494        | 3.0                | 0.0058227624 | 0.53132707           | 0.5          | 2            |
| gb.NM.007981.1/DB_XREF=gi:6897938/GEN=Ec52/FEA=FlmRNA/ CNT=147/ TID=Mm.28982.1/ TIER=FL+Stack/ STK=45/ UG=Mm.28982/ LL=14081/DEF=Mus musculus fatty acid Coenzyme A ligase, long chain 2 (FACL2), mRNA. /PROD=fatty acid Coenzyme A ligase, long chain 2 /FL-gb:NM.007981.1 gb.U15977.1                                                                                                                      | 3965.5664 | 415.30035 | 2066.2332    | 226.85002  | 6.9518514        | 3.0                | 0.006105606  | 0.44570923           | 0.52         | 1.92         |
| gb.BG073508/DB_XREF=gi:12556007/DB_XREF=H3123D10.3/ CLONE=H3123D10/FEA=mrRNA/ CNT=46/ TID=Mm.21795.1/ TIER=Stack/ STK=53/ UG=Mm.21795/ UG_TITLE=Mus musculus, Similar to BCL2adenovirus E1B 19kD interacting protein 1, clone MGC-41600 IMAGE:1264175, mRNA, complete cds                                                                                                                                    | 559.89996 | 13.956017 | 347.1        | 27.04736   | 12.110144        | 2.0                | 0.0067497385 | 0.4106091            | 0.62         | 1.61         |
| gb.AK003586.1/DB_XREF=gi:12834343/FEA=mrRNA/ CNT=119/ TID=Mm.20488.1/ TIER=Stack/ STK=50/ UG=Mm.20488/ LL=76301/ UG_GENE=1110008K06Rik/ UG_TITLE=RIKEN cDNA 1110008K06 gene/DEF=Mus musculus 18 days embryo whole body cDNA, RIKEN full-length enriched library, clone:1110008K06 homolog to FLN2 (FLN2 Gene PRODUCT), full insert sequence.                                                                 | 1412.2666 | 172.08234 | 591.0333     | 137.58932  | 6.455995         | 3.0                | 0.007538527  | 0.39308035           | 0.42         | 2.39         |
| gb.BC006988.1/DB_XREF=gi:1387037/FEA=FlmRNA/ CNT=135/ TID=Mm.20336.1/ TIER=FL+Stack/ STK=80/ UG=Mm.20336/ LL=12908/ UG_GENE=Cral/DEF=Mus musculus, Similar to carnitine acetyltransferase, clone MGC:6046 IMAGE:3499169, mRNA, complete cds. /PROD=Similar to carnitine acetyltransferase /FL-gb:BC006988.1 gb.NM.007760.1                                                                                   | 4650.7334 | 358.1267  | 2468.2334    | 466.95862  | 6.4237013        | 3.0                | 0.007646559  | 0.34887424           | 0.53         | 1.88         |
| gb.BC014685.1/DB_XREF=gi:15928403/FEA=FlmRNA/ CNT=42/ TID=Mm.170023.1/ TIER=FL+Stack/ STK=18/ UG=Mm.170023/DEF=Mus musculus, clone MGC:25977 IMAGE:4241375, mRNA, complete cds. /PROD=Unknown (protein for MGC:25977) /FL-gb:BC014685.1                                                                                                                                                                      | 660.4333  | 51.97042  | 433.63333    | 39.917454  | 5.9945416        | 3.0                | 0.009296497  | 0.37702462           | 0.66         | 1.52         |
| gb.NM.007533.1/DB_XREF=gi:6671623/GEN=Bckha/FEA=FlmRNA/ CNT=211/ TID=Mm.25848.1/ TIER=FL+Stack/ STK=76/ UG=Mm.25848/ LL=12039/DEF=Mus musculus branched chain ketoadic dehydrogenase E1, alpha polypeptide (Bckha), mRNA. /PROD=branched chain ketoadic dehydrogenase E1, alpha polypeptide /FL-gb:BC003787.1 gb.NM.007533.1 gb.U47335.1                                                                     | 2700.0334 | 286.70358 | 1546.7666    | 192.90247  | 5.780555         | 3.0                | 0.010295443  | 0.37578368           | 0.57         | 1.75         |
| gb.BC048804.1/DB_XREF=gi:1235992/FEA=FlmRNA/ CNT=277/ TID=Mm.100540.1/ TIER=FL+Stack/ STK=17/ UG=Mm.100540/ LL=10450/ UG_GENE=Napa/DEF=Mus musculus, RIKEN cDNA 1500039N14 gene, clone MGC:6399 IMAGE:3584869, mRNA, complete cds. /PROD=RIKEN cDNA 1500039N14 gene /FL-gb:NM.025898.1 gb.BC048804.1                                                                                                         | 3788.9336 | 236.00606 | 2382.4668    | 356.9891   | 5.692439         | 3.0                | 0.010747662  | 0.35662696           | 0.63         | 1.59         |
| gb.AB056479.1/DB_XREF=gi:15341205/FEA=FlmRNA/ CNT=427/ TID=Mm.34822.1/ TIER=FL+Stack/ STK=32/ UG=Mm.34822/ LL=12974/ UG_GENE=Cg/DEF=Mus musculus mRNA for citrate synthase, complete cds. /PROD=citrate synthase /FL-gb:BC013554.1 gb.NM.02644.1 gb.AB056479.1                                                                                                                                               | 3668.7334 | 270.4928  | 2305.8333    | 327.08664  | 5.5616684        | 3.0                | 0.011467959  | 0.34881708           | 0.63         | 1.59         |
| gb.BC018375.1/DB_XREF=gi:17380875/FEA=FlmRNA/ CNT=59/ TID=Mm.4451.1/ TIER=FL+Stack/ STK=30/ UG=Mm.4451/ LL=15205/ UG_GENE=Hes1/DEF=Mus musculus, hairy and enhancer of split 1, (Drosophila) /FL-gb:NM.008235.1 gb.BC018375.1                                                                                                                                                                                | 557.3333  | 50.158768 | 345.19998    | 46.835567  | 5.354062         | 3.0                | 0.012746805  | 0.35789105           | 0.62         | 1.61         |
| gb.NM.008761.1/DB_XREF=gi:6879448/DEF=Phps/FEA=FlmRNA/ CNT=174/ TID=Mm.1458.1/ TIER=FL+Stack/ STK=115/ UG=Mm.1458/ LL=10602/DEF=Mus musculus putative phosphatase (Psp), mRNA. /PROD=putative phosphatase /FL-gb:AF483523.1 gb.AF483522.1 gb.NM.008916.1 gb.U96724.1                                                                                                                                         | 1440.2001 | 142.18462 | 787.8        | 161.60974  | 5.2495723        | 3.0                | 0.013461299  | 0.3509553            | 0.55         | 1.83         |
| gb.AK004710.1/DB_XREF=gi:12630083/GEN=Scs32/FEA=mrRNA/ CNT=23/ TID=Mm.21587.2/ TIER=Stack/ STK=16/ UG=Mm.21587/ LL=65962/ UG_TITLE=solute carrier family 9 (sodium/hydrogen exchanger), isoform 3 regulator 2 /DEF=Mus musculus adult male lung cDNA, RIKEN full-length enriched library, clone:1200011K07/solute carrier family 9 (sodium/hydrogen exchanger), isoform 3 regulator 2, full insert sequence. | 764.56665 | 76.69448  | 400.46667    | 93.46831   | 5.215931         | 3.0                | 0.013702431  | 0.33342582           | 0.52         | 1.91         |
| gb.AK012604.1/DB_XREF=gi:12849126/FEA=mrRNA/ CNT=49/ TID=Mm.172946.1/ TIER=Stack/ STK=15/ UG=Mm.172946/ LL=72579/ UG_GENE=2700049M22Rik/ UG_TITLE=RIKEN cDNA 2700049M22 gene/DEF=Mus musculus 11 days embryo whole body cDNA, RIKEN full-length enriched library, clone:2700049M22-hypothetical protein, full insert sequence.                                                                               | 717.3     | 14.961293 | 416.63333    | 60.370216  | 8.372979         | 2.0                | 0.013965844  | 0.31859583           | 0.58         | 1.72         |
| gb.AK049477.1/DB_XREF=gi:12630083/FEA=FlmRNA/ CNT=907/ TID=Mm.22574.1/ TIER=FL+Stack/ STK=90/ UG=Mm.22574/ LL=12978/ UG_GENE=Colony stimulating factor 1 receptor /DEF=Mus musculus adult male liver cDNA, RIKEN full-length enriched library, clone:1300008N20.colony stimulating factor 1 receptor, full insert sequence. /FL-gb:NM.007779.1                                                               | 1033.4667 | 80.77104  | 583.6        | 131.73853  | 5.0423894        | 3.0                | 0.015040075  | 0.32291928           | 0.56         | 1.77         |
| gb.NM.007905.1/DB_XREF=gi:6681272/GEN=Erf12/FEA=FlmRNA/ CNT=64/ TID=Mm.2645.1/ TIER=FL+Stack/ STK=31/ UG=Mm.2645/ LL=13628/DEF=Mus musculus Eukaryotic translation elongation factor 1 alpha 2 (Erf12), mRNA. /PROD=eukaryotic translation elongation factor 1 alpha 2 /FL-gb:U36479.1 gb.NM.007905.1 gb.BC018215.1                                                                                          | 17134.666 | 2077.833  | 9926.967     | 1596.6765  | 4.7641034        | 3.0                | 0.017563034  | 0.3561393            | 0.58         | 1.73         |
| gb.NM.029632.1/DB_XREF=gi:18390326/GEN=Ppp1r11/FEA=FlmRNA/ CNT=146/ TID=Mm.46176.1/ TIER=FL+Stack/ STK=58/ UG=Mm.46176/ LL=76497/DEF=Mus musculus protein phosphatase 1, regulatory (inhibitor) subunit 11 (Ppp1r11), mRNA. /PROD=protein phosphatase 1, regulatory (inhibitor) subunit 11 /FL-gb:NM.029632.1                                                                                                | 3319.6667 | 170.52585 | 1640.5333    | 382.8957   | 6.9386435        | 2.0                | 0.020145172  | 0.38699934           | 0.49         | 2.02         |
| gb.BC008103.1/DB_XREF=gi:14788073/FEA=FlmRNA/ CNT=64/ TID=Mm.196749.1/ TIER=FL+Stack/ STK=24/ UG=Mm.196749/ LL=11840/DEF=Mus musculus, Similar to hypothetical protein FL10504, clone MGC:11722 IMAGE:5968515, mRNA, complete cds. /PROD=Similar to hypothetical protein FL10504 /FL-gb:BC008103.1                                                                                                           | 444.4     | 49.412437 | 264.86667    | 48.947556  | 4.470925         | 3.0                | 0.020850305  | 0.38051805           | 0.6          | 1.68         |
| gb.AK020444.1/DB_XREF=gi:12861029/FEA=mrRNA/ CNT=70/ TID=Mm.36699.1/ TIER=Stack/ STK=42/ UG=Mm.36699/ LL=77254/ UG_GENE=9430028K06Rik/ UG_TITLE=RIKEN cDNA 9430028K10 gene/DEF=Mus musculus 12 days embryo whole body cDNA, RIKEN full-length enriched library, clone:9430028K10 homolog to SATMP, full insert sequence.                                                                                     | 703.2334  | 78.743706 | 433.4        | 69.91444   | 4.438314         | 3.0                | 0.021263769  | 0.36958456           | 0.62         | 1.62         |
| gb.NM.053014.1/DB_XREF=gi:16519540/GEN=Appa3/FEA=FlmRNA/ CNT=6/ TID=Mm.141230.1/ TIER=FL+Stack/ STK=1/ UG=Mm.141230/ LL=28169/DEF=Mus musculus 1-acetylglucosyl-3-phosphate O-acetyltransferase 3 (Appa3), mRNA. /PROD=1-acetylglucosyl-3-phosphate O-acetyltransferase 3 /FL-gb:NM.053014.1                                                                                                                 | 1276.3666 | 167.27182 | 751.9666     | 118.466934 | 4.431236         | 3.0                | 0.021354912  | 0.3542974            | 0.59         | 1.7          |
| gb.AK002437.1/DB_XREF=gi:1284241/FEA=FlmRNA/ CNT=204/ TID=Mm.180189.1/ TIER=FL+Stack/ STK=57/ UG=Mm.180189/ LL=67800/ UG_GENE=Dga2/ UG_TITLE=diacylglycerol O-acetyltransferase 2 /DEF=Mus musculus adult male kidney cDNA, RIKEN full-length enriched library, clone:010010B06.homolog to WUGSCH.DJ047478.5 PROTEIN (FRAGMENT), full insert sequence. /FL-gb:AF384160.1 gb.NM.026384.1                      | 2753.4001 | 267.295   | 1639.7334    | 105.6523   | 6.7112303        | 2.0                | 0.021489117  | 0.34102297           | 0.6          | 1.68         |
| gb.NM.007476.1/DB_XREF=gi:6680715/GEN=Atf1/FEA=FlmRNA/ CNT=64/ TID=Mm.6836.1/ TIER=FL+Stack/ STK=2/ UG=Mm.6836/ LL=11840/DEF=Mus musculus ADF-ribosylation factor 1 (Atf1), mRNA. /PROD=ADP-ribosylation factor 1 /FL-gb:DB7698.1 gb.NM.007476.1                                                                                                                                                             | 1804.6666 | 201.61327 | 1130.6666    | 170.99333  | 4.415943         | 3.0                | 0.021553561  | 0.32779375           | 0.63         | 1.6          |
| gb.BC027445.1/DB_XREF=gi:20071662/FEA=FlmRNA/ CNT=79/ TID=Mm.153891.1/ TIER=FL+Stack/ STK=28/ UG=Mm.153891/ LL=19245/ UG_GENE=Ptp4a3/DEF=Mus musculus, protein tyrosine phosphatase 4a3, clone MGC:36146 IMAGE:4482106, mRNA, complete cds. /PROD=protein tyrosine phosphatase 4a3 /FL-gb:NM.008975.1 gb.AF356645.1 gb.BC027445.1                                                                            | 3634.5999 | 385.0914  | 2027.2666    | 170.24298  | 6.6120944        | 3.0                | 0.022116944  | 0.3229074            | 0.56         | 1.79         |
| gb.NM.028152.1/DB_XREF=gi:15100755/GEN=Mms19/FEA=FlmRNA/ CNT=164/ TID=Mm.28412.1/ TIER=FL+Stack/ STK=32/ UG=Mm.28412/ LL=72199/DEF=Mus musculus MMS19 (MEI18 S. cerevisiae)-like (Mms19), mRNA. /PROD=MMS19 (MEI18 S. cerevisiae)-like /FL-gb:AF319949.1 gb.NM.028152.1                                                                                                                                      | 386.7667  | 35.257385 | 238.33333    | 17.895628  | 6.5022836        | 3.0                | 0.022844655  | 0.3207038            | 0.62         | 1.62         |
| gb.B147262/DB_XREF=gi:15173875/DB_XREF=602988681F1/ CLONE=IMAGE:5144372/FEA=mrRNA/ CNT=159/ TID=Mm.35345.1/ TIER=Stack/ STK=43/ UG=Mm.35345/ LL=11840/DEF=Mus musculus, clone IMAGE:5237602, mRNA, partial cds                                                                                                                                                                                               | 512.1667  | 84.50942  | 246.5        | 68.90783   | 4.2199216        | 3.0                | 0.024325186  | 0.32884046           | 0.48         | 2.08         |
| gb.BC017689.1/DB_XREF=gi:1284241/FEA=FlmRNA/ CNT=148/ TID=Mm.19258.1/ TIER=FL+Stack/ STK=1/ UG=Mm.19258/ LL=66951/ UG_GENE=2310028D20Rik/DEF=Mus musculus, Similar to tyrothroph embryonic factor, clone MGC:19233 IMAGE:4242534, mRNA, complete cds. /PROD=Similar to tyrothroph embryonic factor /FL-gb:BC017689.1                                                                                         | 2227.3333 | 188.9985  | 1486.5       | 238.61961  | 4.2153683        | 3.0                | 0.024394894  | 0.31800488           | 0.67         | 1.5          |
| gb.AK033605.1/DB_XREF=gi:12833890/FEA=mrRNA/ CNT=531/ TID=Mm.46367.1/ TIER=Stack/ STK=12/ UG=Mm.46367/ LL=68453/ UG_GENE=1110002J10Rik/ UG_TITLE=RIKEN cDNA 1110002J10 gene/DEF=Mus musculus 18 days embryo whole body cDNA, RIKEN full-length enriched library, clone:1110002J10.unclassified, full insert sequence.                                                                                        | 5818.1997 | 927.7161  | 3272.6667    | 519.24005  | 4.1471405        | 3.0                | 0.025470959  | 0.32058278           | 0.56         | 1.78         |
| gb.AF136571.1/DB_XREF=gi:1507284/FEA=FlmRNA/ CNT=14/ TID=Mm.10211.2/ TIER=FL+Stack/ STK=1/ UG=Mm.10211/ LL=12499/ UG_GENE=Entp5/DEF=Mus musculus PcpH proto-oncogene protein mRNA, complete cds. /PROD=PcpH proto-oncogene protein /FL-gb:AF136571.1                                                                                                                                                         | 602.6667  | 72.00232  | 401.03336    | 45.249798  | 4.106742         | 3.0                | 0.026137074  | 0.31800106           | 0.67         | 1.5          |
| gb.BC027445.1/DB_XREF=gi:12847833/FEA=mrRNA/ CNT=96/ TID=Mm.21693.1/ TIER=Stack/ STK=4/ UG=Mm.21693/ LL=76201/ UG_GENE=2610028P08Rik/ UG_TITLE=RIKEN cDNA 2610028P08 gene/DEF=Mus musculus 10 days embryo whole body cDNA, RIKEN full-length enriched library, clone:2610028P08.homolog to CDNA FLJ20128 FIS. CLONE COL06181, full insert sequence.                                                          | 428.7333  | 51.981567 | 236.03333    | 62.753677  | 4.095951         | 3.0                | 0.02631879   | 0.30988252           | 0.55         | 1.82         |
| gb.NM.011776.1/DB_XREF=gi:7242190/GEN=Pasp/FEA=FlmRNA/ CNT=332/ TID=Mm.3383.1/ TIER=FL+Stack/ STK=1/ UG=Mm.3383/ LL=19156/DEF=Mus musculus prosaposin (Pasp), mRNA. /PROD=prosaposin /FL-gb:NM.011776.1                                                                                                                                                                                                      | 5425.933  | 829.29877 | 2215.7332    | 1085.7566  | 4.06974          | 3.0                | 0.026767017  | 0.3053113            | 0.41         | 2.45         |
| gb.AK00460.1/DB_XREF=gi:12844269/FEA=mrRNA/ CNT=27/ TID=Mm.218627.2/ TIER=Stack/ STK=20/ UG=Mm.218627/ LL=66053/ UG_GENE=Ppil2/UG_TITLE=peptidylglyoxyl isomerase (cyclophilin-like) 2 /DEF=Mus musculus adult male tongue cDNA, RIKEN full-length enriched library, clone:2310022D1.homolog to CYCLOPHILIN-LIKE PROTEIN CYP-60, full insert sequence.                                                       | 726.69995 | 100.58585 | 387.8667     | 104.56621  | 4.044865         | 3.0                | 0.027201526  | 0.30086538           | 0.53         | 1.87         |
| gb.BC024138.1/DB_XREF=gi:12838268/FEA=FlmRNA/ CNT=226/ TID=Mm.22626.1/ TIER=FL+Stack/ STK=1/ UG=Mm.22626/ LL=66951/ UG_GENE=2310078J06Rik/DEF=Mus musculus, Similar to tyrothroph embryonic factor, clone MGC:37973 IMAGE:5136320, mRNA, complete cds. /PROD=RIKEN cDNA 2310078J06 gene /FL-gb:BC024138.1                                                                                                    | 1782.4    | 251.44804 | 1036.3667    | 201.14285  | 4.012932         | 3.0                | 0.027772743  | 0.29814857           | 0.58         | 1.72         |
| gb.BC018323.1/DB_XREF=gi:17380875/FEA=FlmRNA/ CNT=100/ TID=Mm.3459.1/ TIER=FL+Stack/ STK=28/ UG=Mm.3459/ LL=13170/ UG_GENE=Ddp/DEF=Mus musculus, D site albumin promoter binding protein, clone MGC:18803 IMAGE:4195116, mRNA, complete cds. /PROD=D site albumin promoter binding protein /FL-gb:NM.016974.1 gb.BC018323.1                                                                                  | 2181.5    | 125.08818 | 1068.4       | 314.64484  | 5.693912         | 2.0                | 0.029487085  | 0.30750817           | 0.49         | 2.04         |
| gb.NM.008398.1/DB_XREF=gi:6680479/GEN=Ilgav/FEA=FlmRNA/ CNT=47/ TID=Mm.179747/ TIER=FL+Stack/ STK=24/ UG=Mm.179747/ LL=16404/DEF=Mus musculus integrin alpha 7 (Ilgav), mRNA. /PROD=integrin alpha 7 /FL-gb:NM.008398.1 gb.U123423.1                                                                                                                                                                         | 982.36664 | 117.43058 | 634.99994    | 100.058136 | 3.8998327        | 3.0                | 0.029924314  | 0.3033993            | 0.65         | 1.55         |
| gb.AF206720.1/DB_XREF=gi:6636320/FEA=FlmRNA/ CNT=130/ TID=Mm.38469.1/ TIER=FL+Stack/ STK=83/ UG=Mm.38469/ LL=11785/ UG_GENE=Alpo1/DEF=Mus musculus p165 mRNA, complete cds. /PROD=P65 /FL-gb:AF206720.1                                                                                                                                                                                                      | 1659.7334 | 267.31207 | 867.3        | 232.41673  | 3.8747864        | 3.0                | 0.030429503  | 0.30018294           | 0.52         | 1.91         |
| gb.B408679/DB_XREF=gi:15169602/DB_XREF=602994304F1/ CLONE=IMAGE:5118956/FEA=mrRNA/ CNT=61/ TID=Mm.29389.1/ TIER=Stack/ STK=30/ UG=Mm.29389/ UG_TITLE=Mus musculus, Similar to KIAA1075 protein, clone IMAGE:5099327, mRNA, partial cds                                                                                                                                                                       | 1488.9    | 179.23257 | 810.2        | 246.92395  | 3.8527741        | 3.0                | 0.030882569  | 0.29663518           | 0.54         | 1.84         |
| gb.NM.010116.1/DB_XREF=gi:7106302/GEN=Edh1/FEA=FlmRNA/ CNT=383/ TID=Mm.30169.1/ TIER=FL+Stack/ STK=145/ UG=Mm.30169/ LL=13660/DEF=Mus musculus E1 domain containing 1 (Edh1), mRNA. /PROD=E1 domain containing 1 /FL-gb:NM.010116.1 gb.AF099186.1 gb.AF173156.1                                                                                                                                              | 517.63336 | 69.581696 | 323.16666    | 53.06084   | 3.8492374        | 3.0                | 0.03095617   | 0.289718             | 0.62         | 1.6          |
| gb.NM.009983.1/DB_XREF=gi:6753555/GEN=Ctsd/FEA=FlmRNA/ CNT=522/ TID=Mm.2147.1/ TIER=FL+Stack/ STK=193/ UG=Mm.2147/ LL=13033/DEF=Mus musculus cathepsin D (Ctsd), mRNA. /PROD=cathepsin D /FL-gb:NM.009983.1                                                                                                                                                                                                  | 5454.1333 | 777.9049  | 3241.0332    | 625.04315  | 3.8412483        | 3.0                | 0.031123256  | 0.2839997            | 0.59         | 1.68         |
| gb.U082071.1/DB_XREF=gi:2680307/GEN=Col2A1/FEA=FlmRNA/ CNT=189/ TID=Mm.18917.1/ TIER=FL+Stack/ STK=1/ UG=Mm.18916/ LL=14719/DEF=Mus musculus aspartate aminotransferase precursor (Col2A1) mRNA, Col2A1 allele, complete cds; nuclear gene for mitochondrial product. /PROD=aspartate aminotransferase precursor /FL-gb:U82470.1 gb.U082071.1 gb.NM.010325.1                                                 | 4684.267  | 741.73334 | 2668.0999    | 544.53687  | 3.795118         |                    |              |                      |              |              |

2

|                                                                                                                                                                                                                                                                                                                                                                                                                                                                                                                                                                                                                                                           |            |           |           |           |           |     |             |            |      |      |                                                                                                                                                                                                                                                                                                                                                                                                                                                                                                                                                                                                                                                           |           |           |           |           |           |     |             |            |      |      |                                                                                                                                                                                                                                                                                                                                                                                                                                                                                                                                                                                                                                                           |           |           |           |           |           |     |             |            |      |      |                                                                                                                                                                                                                                                                                                                                                                                                                                                                                                                                                                                                                                        |           |           |           |           |           |     |             |            |      |      |                                                                                                                                                                                                                                                                                                                                                                                                                                                                                                                                                                                                                                        |           |           |           |           |           |     |             |            |      |      |                                                                                                                                                                                                                                                                                                                                                                                                                                                                                                                                                                                                                                        |           |           |           |           |           |     |             |            |      |      |                                                                                                                                                                                                                                                                                                                                                                                                                                                                                                                                                                                                                                        |           |           |           |           |           |     |             |            |      |      |                                                                                                                                                                                                                                                                                                                                                                                                                                                                                                                                                                                                                                        |           |           |           |           |           |     |             |            |      |      |                                                                                                                                                                                                                                                                                                                                                                                                                                                                                                                                                                                                                                        |           |           |           |           |           |     |             |            |      |      |                                                                                                                                                                                                                                                                                                                                                                                                                                                                                                                                                                                                                                        |           |           |           |           |           |     |             |            |      |      |                                                                                                                                                                                                                                                                                                                                                                                                                                                                                                                                                                                                                                        |           |           |           |           |           |     |             |            |      |      |                                                                                                                                                                                                                                                                                                                                                                                                                                                                                                                                                                                                                                        |           |           |           |           |           |     |             |            |      |      |                                                                                                                                                                                                                                                                                                                                                                                                                                                                                                                                                                                                                                        |           |           |           |           |           |     |             |            |      |      |                                                                                                                                                                                                                                                                                                                                                                                                                                                                                                                                                                                                                                        |           |           |           |           |           |     |             |            |      |      |                                                                                                                                                                                                                                                                                                                                                                                                                                                                                                  |           |           |           |           |           |     |             |            |      |      |                                                                                                                                                                                                                                                                                                                                                                                                                                                                                                  |           |           |           |           |           |     |             |            |      |      |                                                                                                                                                                                                                                                                                                                                                                                                                                                                                                  |          |           |           |           |           |     |             |            |      |      |                                                                                                                                                                                                                                                                                                                                                                                                                                                                                                  |        |           |           |          |           |     |            |            |      |      |                                                                                                                                                                                                                                                                                                                                                                                                                                                                                                  |
|-----------------------------------------------------------------------------------------------------------------------------------------------------------------------------------------------------------------------------------------------------------------------------------------------------------------------------------------------------------------------------------------------------------------------------------------------------------------------------------------------------------------------------------------------------------------------------------------------------------------------------------------------------------|------------|-----------|-----------|-----------|-----------|-----|-------------|------------|------|------|-----------------------------------------------------------------------------------------------------------------------------------------------------------------------------------------------------------------------------------------------------------------------------------------------------------------------------------------------------------------------------------------------------------------------------------------------------------------------------------------------------------------------------------------------------------------------------------------------------------------------------------------------------------|-----------|-----------|-----------|-----------|-----------|-----|-------------|------------|------|------|-----------------------------------------------------------------------------------------------------------------------------------------------------------------------------------------------------------------------------------------------------------------------------------------------------------------------------------------------------------------------------------------------------------------------------------------------------------------------------------------------------------------------------------------------------------------------------------------------------------------------------------------------------------|-----------|-----------|-----------|-----------|-----------|-----|-------------|------------|------|------|----------------------------------------------------------------------------------------------------------------------------------------------------------------------------------------------------------------------------------------------------------------------------------------------------------------------------------------------------------------------------------------------------------------------------------------------------------------------------------------------------------------------------------------------------------------------------------------------------------------------------------------|-----------|-----------|-----------|-----------|-----------|-----|-------------|------------|------|------|----------------------------------------------------------------------------------------------------------------------------------------------------------------------------------------------------------------------------------------------------------------------------------------------------------------------------------------------------------------------------------------------------------------------------------------------------------------------------------------------------------------------------------------------------------------------------------------------------------------------------------------|-----------|-----------|-----------|-----------|-----------|-----|-------------|------------|------|------|----------------------------------------------------------------------------------------------------------------------------------------------------------------------------------------------------------------------------------------------------------------------------------------------------------------------------------------------------------------------------------------------------------------------------------------------------------------------------------------------------------------------------------------------------------------------------------------------------------------------------------------|-----------|-----------|-----------|-----------|-----------|-----|-------------|------------|------|------|----------------------------------------------------------------------------------------------------------------------------------------------------------------------------------------------------------------------------------------------------------------------------------------------------------------------------------------------------------------------------------------------------------------------------------------------------------------------------------------------------------------------------------------------------------------------------------------------------------------------------------------|-----------|-----------|-----------|-----------|-----------|-----|-------------|------------|------|------|----------------------------------------------------------------------------------------------------------------------------------------------------------------------------------------------------------------------------------------------------------------------------------------------------------------------------------------------------------------------------------------------------------------------------------------------------------------------------------------------------------------------------------------------------------------------------------------------------------------------------------------|-----------|-----------|-----------|-----------|-----------|-----|-------------|------------|------|------|----------------------------------------------------------------------------------------------------------------------------------------------------------------------------------------------------------------------------------------------------------------------------------------------------------------------------------------------------------------------------------------------------------------------------------------------------------------------------------------------------------------------------------------------------------------------------------------------------------------------------------------|-----------|-----------|-----------|-----------|-----------|-----|-------------|------------|------|------|----------------------------------------------------------------------------------------------------------------------------------------------------------------------------------------------------------------------------------------------------------------------------------------------------------------------------------------------------------------------------------------------------------------------------------------------------------------------------------------------------------------------------------------------------------------------------------------------------------------------------------------|-----------|-----------|-----------|-----------|-----------|-----|-------------|------------|------|------|----------------------------------------------------------------------------------------------------------------------------------------------------------------------------------------------------------------------------------------------------------------------------------------------------------------------------------------------------------------------------------------------------------------------------------------------------------------------------------------------------------------------------------------------------------------------------------------------------------------------------------------|-----------|-----------|-----------|-----------|-----------|-----|-------------|------------|------|------|----------------------------------------------------------------------------------------------------------------------------------------------------------------------------------------------------------------------------------------------------------------------------------------------------------------------------------------------------------------------------------------------------------------------------------------------------------------------------------------------------------------------------------------------------------------------------------------------------------------------------------------|-----------|-----------|-----------|-----------|-----------|-----|-------------|------------|------|------|----------------------------------------------------------------------------------------------------------------------------------------------------------------------------------------------------------------------------------------------------------------------------------------------------------------------------------------------------------------------------------------------------------------------------------------------------------------------------------------------------------------------------------------------------------------------------------------------------------------------------------------|-----------|-----------|-----------|-----------|-----------|-----|-------------|------------|------|------|----------------------------------------------------------------------------------------------------------------------------------------------------------------------------------------------------------------------------------------------------------------------------------------------------------------------------------------------------------------------------------------------------------------------------------------------------------------------------------------------------------------------------------------------------------------------------------------------------------------------------------------|-----------|-----------|-----------|-----------|-----------|-----|-------------|------------|------|------|--------------------------------------------------------------------------------------------------------------------------------------------------------------------------------------------------------------------------------------------------------------------------------------------------------------------------------------------------------------------------------------------------------------------------------------------------------------------------------------------------|-----------|-----------|-----------|-----------|-----------|-----|-------------|------------|------|------|--------------------------------------------------------------------------------------------------------------------------------------------------------------------------------------------------------------------------------------------------------------------------------------------------------------------------------------------------------------------------------------------------------------------------------------------------------------------------------------------------|-----------|-----------|-----------|-----------|-----------|-----|-------------|------------|------|------|--------------------------------------------------------------------------------------------------------------------------------------------------------------------------------------------------------------------------------------------------------------------------------------------------------------------------------------------------------------------------------------------------------------------------------------------------------------------------------------------------|----------|-----------|-----------|-----------|-----------|-----|-------------|------------|------|------|--------------------------------------------------------------------------------------------------------------------------------------------------------------------------------------------------------------------------------------------------------------------------------------------------------------------------------------------------------------------------------------------------------------------------------------------------------------------------------------------------|--------|-----------|-----------|----------|-----------|-----|------------|------------|------|------|--------------------------------------------------------------------------------------------------------------------------------------------------------------------------------------------------------------------------------------------------------------------------------------------------------------------------------------------------------------------------------------------------------------------------------------------------------------------------------------------------|
| gb BC024394.1 DB_XREF=gi:19354424 FEA=FLmRNA CNT=2007 TID=Mm.34570.2 TIER=FL+Slack STK=106 UG=Mm.34570.1 UG_GENE=Irfp3 DEF=Mus musculus, RNA polymerase 1, 116 kDa subunit, clone MGC 36184 IMAGE:4987975, mRNA, complete cds. /PROD=RNA polymerase 1, 116 kDa subunit FL-gb BC024394.1                                                                                                                                                                                                                                                                                                                                                                   | 1394.3667  | 266.72238 | 763.7     | 316.98685 | 2.6367848 | 3.0 | 0.07787033  | 0.28141257 | 0.55 | 1.83 |                                                                                                                                                                                                                                                                                                                                                                                                                                                                                                                                                                                                                                                           |           |           |           |           |           |     |             |            |      |      |                                                                                                                                                                                                                                                                                                                                                                                                                                                                                                                                                                                                                                                           |           |           |           |           |           |     |             |            |      |      |                                                                                                                                                                                                                                                                                                                                                                                                                                                                                                                                                                                                                                        |           |           |           |           |           |     |             |            |      |      |                                                                                                                                                                                                                                                                                                                                                                                                                                                                                                                                                                                                                                        |           |           |           |           |           |     |             |            |      |      |                                                                                                                                                                                                                                                                                                                                                                                                                                                                                                                                                                                                                                        |           |           |           |           |           |     |             |            |      |      |                                                                                                                                                                                                                                                                                                                                                                                                                                                                                                                                                                                                                                        |           |           |           |           |           |     |             |            |      |      |                                                                                                                                                                                                                                                                                                                                                                                                                                                                                                                                                                                                                                        |           |           |           |           |           |     |             |            |      |      |                                                                                                                                                                                                                                                                                                                                                                                                                                                                                                                                                                                                                                        |           |           |           |           |           |     |             |            |      |      |                                                                                                                                                                                                                                                                                                                                                                                                                                                                                                                                                                                                                                        |           |           |           |           |           |     |             |            |      |      |                                                                                                                                                                                                                                                                                                                                                                                                                                                                                                                                                                                                                                        |           |           |           |           |           |     |             |            |      |      |                                                                                                                                                                                                                                                                                                                                                                                                                                                                                                                                                                                                                                        |           |           |           |           |           |     |             |            |      |      |                                                                                                                                                                                                                                                                                                                                                                                                                                                                                                                                                                                                                                        |           |           |           |           |           |     |             |            |      |      |                                                                                                                                                                                                                                                                                                                                                                                                                                                                                                                                                                                                                                        |           |           |           |           |           |     |             |            |      |      |                                                                                                                                                                                                                                                                                                                                                                                                                                                                                                  |           |           |           |           |           |     |             |            |      |      |                                                                                                                                                                                                                                                                                                                                                                                                                                                                                                  |           |           |           |           |           |     |             |            |      |      |                                                                                                                                                                                                                                                                                                                                                                                                                                                                                                  |          |           |           |           |           |     |             |            |      |      |                                                                                                                                                                                                                                                                                                                                                                                                                                                                                                  |        |           |           |          |           |     |            |            |      |      |                                                                                                                                                                                                                                                                                                                                                                                                                                                                                                  |
| gb BC013486.1 DB_XREF=gi:15488676 FEA=FLmRNA CNT=1989 TID=Mm.41389.1 TIER=FL+Slack STK=141 UG=Mm.41389.1 LL=66277 UG_GENE=K15 DEF=Mus musculus, Kruppel-like factor 15, clone MGC:19125 IMAGE:4211067, mRNA, complete cds.                                                                                                                                                                                                                                                                                                                                                                                                                                | 164.1.1333 | 293.1515  | 993.6667  | 309.8631  | 2.6290479 | 3.0 | 0.07838921  | 0.28051043 | 0.61 | 1.65 |                                                                                                                                                                                                                                                                                                                                                                                                                                                                                                                                                                                                                                                           |           |           |           |           |           |     |             |            |      |      |                                                                                                                                                                                                                                                                                                                                                                                                                                                                                                                                                                                                                                                           |           |           |           |           |           |     |             |            |      |      |                                                                                                                                                                                                                                                                                                                                                                                                                                                                                                                                                                                                                                        |           |           |           |           |           |     |             |            |      |      |                                                                                                                                                                                                                                                                                                                                                                                                                                                                                                                                                                                                                                        |           |           |           |           |           |     |             |            |      |      |                                                                                                                                                                                                                                                                                                                                                                                                                                                                                                                                                                                                                                        |           |           |           |           |           |     |             |            |      |      |                                                                                                                                                                                                                                                                                                                                                                                                                                                                                                                                                                                                                                        |           |           |           |           |           |     |             |            |      |      |                                                                                                                                                                                                                                                                                                                                                                                                                                                                                                                                                                                                                                        |           |           |           |           |           |     |             |            |      |      |                                                                                                                                                                                                                                                                                                                                                                                                                                                                                                                                                                                                                                        |           |           |           |           |           |     |             |            |      |      |                                                                                                                                                                                                                                                                                                                                                                                                                                                                                                                                                                                                                                        |           |           |           |           |           |     |             |            |      |      |                                                                                                                                                                                                                                                                                                                                                                                                                                                                                                                                                                                                                                        |           |           |           |           |           |     |             |            |      |      |                                                                                                                                                                                                                                                                                                                                                                                                                                                                                                                                                                                                                                        |           |           |           |           |           |     |             |            |      |      |                                                                                                                                                                                                                                                                                                                                                                                                                                                                                                                                                                                                                                        |           |           |           |           |           |     |             |            |      |      |                                                                                                                                                                                                                                                                                                                                                                                                                                                                                                                                                                                                                                        |           |           |           |           |           |     |             |            |      |      |                                                                                                                                                                                                                                                                                                                                                                                                                                                                                                  |           |           |           |           |           |     |             |            |      |      |                                                                                                                                                                                                                                                                                                                                                                                                                                                                                                  |           |           |           |           |           |     |             |            |      |      |                                                                                                                                                                                                                                                                                                                                                                                                                                                                                                  |          |           |           |           |           |     |             |            |      |      |                                                                                                                                                                                                                                                                                                                                                                                                                                                                                                  |        |           |           |          |           |     |            |            |      |      |                                                                                                                                                                                                                                                                                                                                                                                                                                                                                                  |
| /PROD=Kruppel-like factor 15 FL-gb NM_023184.1 gb AF1317225.1 gb BC013486.1                                                                                                                                                                                                                                                                                                                                                                                                                                                                                                                                                                               |            |           |           |           |           |     |             |            |      |      |                                                                                                                                                                                                                                                                                                                                                                                                                                                                                                                                                                                                                                                           |           |           |           |           |           |     |             |            |      |      |                                                                                                                                                                                                                                                                                                                                                                                                                                                                                                                                                                                                                                                           |           |           |           |           |           |     |             |            |      |      |                                                                                                                                                                                                                                                                                                                                                                                                                                                                                                                                                                                                                                        |           |           |           |           |           |     |             |            |      |      |                                                                                                                                                                                                                                                                                                                                                                                                                                                                                                                                                                                                                                        |           |           |           |           |           |     |             |            |      |      |                                                                                                                                                                                                                                                                                                                                                                                                                                                                                                                                                                                                                                        |           |           |           |           |           |     |             |            |      |      |                                                                                                                                                                                                                                                                                                                                                                                                                                                                                                                                                                                                                                        |           |           |           |           |           |     |             |            |      |      |                                                                                                                                                                                                                                                                                                                                                                                                                                                                                                                                                                                                                                        |           |           |           |           |           |     |             |            |      |      |                                                                                                                                                                                                                                                                                                                                                                                                                                                                                                                                                                                                                                        |           |           |           |           |           |     |             |            |      |      |                                                                                                                                                                                                                                                                                                                                                                                                                                                                                                                                                                                                                                        |           |           |           |           |           |     |             |            |      |      |                                                                                                                                                                                                                                                                                                                                                                                                                                                                                                                                                                                                                                        |           |           |           |           |           |     |             |            |      |      |                                                                                                                                                                                                                                                                                                                                                                                                                                                                                                                                                                                                                                        |           |           |           |           |           |     |             |            |      |      |                                                                                                                                                                                                                                                                                                                                                                                                                                                                                                                                                                                                                                        |           |           |           |           |           |     |             |            |      |      |                                                                                                                                                                                                                                                                                                                                                                                                                                                                                                                                                                                                                                        |           |           |           |           |           |     |             |            |      |      |                                                                                                                                                                                                                                                                                                                                                                                                                                                                                                  |           |           |           |           |           |     |             |            |      |      |                                                                                                                                                                                                                                                                                                                                                                                                                                                                                                  |           |           |           |           |           |     |             |            |      |      |                                                                                                                                                                                                                                                                                                                                                                                                                                                                                                  |          |           |           |           |           |     |             |            |      |      |                                                                                                                                                                                                                                                                                                                                                                                                                                                                                                  |        |           |           |          |           |     |            |            |      |      |                                                                                                                                                                                                                                                                                                                                                                                                                                                                                                  |
| gb NM_009777.1 DB_XREF=gi:10671071 FEA=FLmRNA CNT=1487 TID=Mm.2570.1 TIER=FL+Slack STK=58                                                                                                                                                                                                                                                                                                                                                                                                                                                                                                                                                                 | 2006.4667  | 304.08218 | 1285.4332 | 365.01932 | 2.6287265 | 3.0 | 0.078410864 | 0.27786374 | 0.64 | 1.56 |                                                                                                                                                                                                                                                                                                                                                                                                                                                                                                                                                                                                                                                           |           |           |           |           |           |     |             |            |      |      |                                                                                                                                                                                                                                                                                                                                                                                                                                                                                                                                                                                                                                                           |           |           |           |           |           |     |             |            |      |      |                                                                                                                                                                                                                                                                                                                                                                                                                                                                                                                                                                                                                                        |           |           |           |           |           |     |             |            |      |      |                                                                                                                                                                                                                                                                                                                                                                                                                                                                                                                                                                                                                                        |           |           |           |           |           |     |             |            |      |      |                                                                                                                                                                                                                                                                                                                                                                                                                                                                                                                                                                                                                                        |           |           |           |           |           |     |             |            |      |      |                                                                                                                                                                                                                                                                                                                                                                                                                                                                                                                                                                                                                                        |           |           |           |           |           |     |             |            |      |      |                                                                                                                                                                                                                                                                                                                                                                                                                                                                                                                                                                                                                                        |           |           |           |           |           |     |             |            |      |      |                                                                                                                                                                                                                                                                                                                                                                                                                                                                                                                                                                                                                                        |           |           |           |           |           |     |             |            |      |      |                                                                                                                                                                                                                                                                                                                                                                                                                                                                                                                                                                                                                                        |           |           |           |           |           |     |             |            |      |      |                                                                                                                                                                                                                                                                                                                                                                                                                                                                                                                                                                                                                                        |           |           |           |           |           |     |             |            |      |      |                                                                                                                                                                                                                                                                                                                                                                                                                                                                                                                                                                                                                                        |           |           |           |           |           |     |             |            |      |      |                                                                                                                                                                                                                                                                                                                                                                                                                                                                                                                                                                                                                                        |           |           |           |           |           |     |             |            |      |      |                                                                                                                                                                                                                                                                                                                                                                                                                                                                                                                                                                                                                                        |           |           |           |           |           |     |             |            |      |      |                                                                                                                                                                                                                                                                                                                                                                                                                                                                                                  |           |           |           |           |           |     |             |            |      |      |                                                                                                                                                                                                                                                                                                                                                                                                                                                                                                  |           |           |           |           |           |     |             |            |      |      |                                                                                                                                                                                                                                                                                                                                                                                                                                                                                                  |          |           |           |           |           |     |             |            |      |      |                                                                                                                                                                                                                                                                                                                                                                                                                                                                                                  |        |           |           |          |           |     |            |            |      |      |                                                                                                                                                                                                                                                                                                                                                                                                                                                                                                  |
| UG=Mm.2570.1 LL=12260 DEF=Mus musculus complement component 1, q subcomponent, beta polypeptide (C1qb), mRNA. /PROD=complement component 1, q subcomponent, beta polypeptide (C1qb) FL-gb NM_009777.1                                                                                                                                                                                                                                                                                                                                                                                                                                                     |            |           |           |           |           |     |             |            |      |      |                                                                                                                                                                                                                                                                                                                                                                                                                                                                                                                                                                                                                                                           |           |           |           |           |           |     |             |            |      |      |                                                                                                                                                                                                                                                                                                                                                                                                                                                                                                                                                                                                                                                           |           |           |           |           |           |     |             |            |      |      |                                                                                                                                                                                                                                                                                                                                                                                                                                                                                                                                                                                                                                        |           |           |           |           |           |     |             |            |      |      |                                                                                                                                                                                                                                                                                                                                                                                                                                                                                                                                                                                                                                        |           |           |           |           |           |     |             |            |      |      |                                                                                                                                                                                                                                                                                                                                                                                                                                                                                                                                                                                                                                        |           |           |           |           |           |     |             |            |      |      |                                                                                                                                                                                                                                                                                                                                                                                                                                                                                                                                                                                                                                        |           |           |           |           |           |     |             |            |      |      |                                                                                                                                                                                                                                                                                                                                                                                                                                                                                                                                                                                                                                        |           |           |           |           |           |     |             |            |      |      |                                                                                                                                                                                                                                                                                                                                                                                                                                                                                                                                                                                                                                        |           |           |           |           |           |     |             |            |      |      |                                                                                                                                                                                                                                                                                                                                                                                                                                                                                                                                                                                                                                        |           |           |           |           |           |     |             |            |      |      |                                                                                                                                                                                                                                                                                                                                                                                                                                                                                                                                                                                                                                        |           |           |           |           |           |     |             |            |      |      |                                                                                                                                                                                                                                                                                                                                                                                                                                                                                                                                                                                                                                        |           |           |           |           |           |     |             |            |      |      |                                                                                                                                                                                                                                                                                                                                                                                                                                                                                                                                                                                                                                        |           |           |           |           |           |     |             |            |      |      |                                                                                                                                                                                                                                                                                                                                                                                                                                                                                                                                                                                                                                        |           |           |           |           |           |     |             |            |      |      |                                                                                                                                                                                                                                                                                                                                                                                                                                                                                                  |           |           |           |           |           |     |             |            |      |      |                                                                                                                                                                                                                                                                                                                                                                                                                                                                                                  |           |           |           |           |           |     |             |            |      |      |                                                                                                                                                                                                                                                                                                                                                                                                                                                                                                  |          |           |           |           |           |     |             |            |      |      |                                                                                                                                                                                                                                                                                                                                                                                                                                                                                                  |        |           |           |          |           |     |            |            |      |      |                                                                                                                                                                                                                                                                                                                                                                                                                                                                                                  |
| gb AF041858.1 DB_XREF=gi:3241986 FEA=mRNA CNT=17 TID=Mm.30717.5 TIER=ConsEnd STK=0 UG=Mm.30717.1 LL=20975 UG_GENE=Synp DEF=Mus musculus synaptobrevin 2 isoform delta mRNA, partial cds. /PROD=synaptobrevin 2 isoform delta                                                                                                                                                                                                                                                                                                                                                                                                                              | 608.3667   | 48.258926 | 377.56668 | 109.53727 | 3.3397484 | 2.0 | 0.07915579  | 0.27780637 | 0.62 | 1.61 |                                                                                                                                                                                                                                                                                                                                                                                                                                                                                                                                                                                                                                                           |           |           |           |           |           |     |             |            |      |      |                                                                                                                                                                                                                                                                                                                                                                                                                                                                                                                                                                                                                                                           |           |           |           |           |           |     |             |            |      |      |                                                                                                                                                                                                                                                                                                                                                                                                                                                                                                                                                                                                                                        |           |           |           |           |           |     |             |            |      |      |                                                                                                                                                                                                                                                                                                                                                                                                                                                                                                                                                                                                                                        |           |           |           |           |           |     |             |            |      |      |                                                                                                                                                                                                                                                                                                                                                                                                                                                                                                                                                                                                                                        |           |           |           |           |           |     |             |            |      |      |                                                                                                                                                                                                                                                                                                                                                                                                                                                                                                                                                                                                                                        |           |           |           |           |           |     |             |            |      |      |                                                                                                                                                                                                                                                                                                                                                                                                                                                                                                                                                                                                                                        |           |           |           |           |           |     |             |            |      |      |                                                                                                                                                                                                                                                                                                                                                                                                                                                                                                                                                                                                                                        |           |           |           |           |           |     |             |            |      |      |                                                                                                                                                                                                                                                                                                                                                                                                                                                                                                                                                                                                                                        |           |           |           |           |           |     |             |            |      |      |                                                                                                                                                                                                                                                                                                                                                                                                                                                                                                                                                                                                                                        |           |           |           |           |           |     |             |            |      |      |                                                                                                                                                                                                                                                                                                                                                                                                                                                                                                                                                                                                                                        |           |           |           |           |           |     |             |            |      |      |                                                                                                                                                                                                                                                                                                                                                                                                                                                                                                                                                                                                                                        |           |           |           |           |           |     |             |            |      |      |                                                                                                                                                                                                                                                                                                                                                                                                                                                                                                                                                                                                                                        |           |           |           |           |           |     |             |            |      |      |                                                                                                                                                                                                                                                                                                                                                                                                                                                                                                  |           |           |           |           |           |     |             |            |      |      |                                                                                                                                                                                                                                                                                                                                                                                                                                                                                                  |           |           |           |           |           |     |             |            |      |      |                                                                                                                                                                                                                                                                                                                                                                                                                                                                                                  |          |           |           |           |           |     |             |            |      |      |                                                                                                                                                                                                                                                                                                                                                                                                                                                                                                  |        |           |           |          |           |     |            |            |      |      |                                                                                                                                                                                                                                                                                                                                                                                                                                                                                                  |
| gb NM_023371.1 DB_XREF=gi:12863822 GEN=PinP1 FEA=FLmRNA CNT=1737 TID=Mm.7906.1 TIER=FL+Slack STK=110 UG=Mm.7906.1 LL=23988 DEF=Mus musculus protein (peptidyl-prolyl cistrans isomerase) NIMA-interacting 1 (Pin1), mRNA. /PROD=protein (peptidyl-prolyl cistrans isomerase)NIMA-interacting 1 FL-gb NM_023371.1                                                                                                                                                                                                                                                                                                                                          | 3336.7666  | 745.0641  | 1999.5333 | 480.16516 | 2.613035  | 3.0 | 0.07947676  | 0.27627635 | 0.6  | 1.67 |                                                                                                                                                                                                                                                                                                                                                                                                                                                                                                                                                                                                                                                           |           |           |           |           |           |     |             |            |      |      |                                                                                                                                                                                                                                                                                                                                                                                                                                                                                                                                                                                                                                                           |           |           |           |           |           |     |             |            |      |      |                                                                                                                                                                                                                                                                                                                                                                                                                                                                                                                                                                                                                                        |           |           |           |           |           |     |             |            |      |      |                                                                                                                                                                                                                                                                                                                                                                                                                                                                                                                                                                                                                                        |           |           |           |           |           |     |             |            |      |      |                                                                                                                                                                                                                                                                                                                                                                                                                                                                                                                                                                                                                                        |           |           |           |           |           |     |             |            |      |      |                                                                                                                                                                                                                                                                                                                                                                                                                                                                                                                                                                                                                                        |           |           |           |           |           |     |             |            |      |      |                                                                                                                                                                                                                                                                                                                                                                                                                                                                                                                                                                                                                                        |           |           |           |           |           |     |             |            |      |      |                                                                                                                                                                                                                                                                                                                                                                                                                                                                                                                                                                                                                                        |           |           |           |           |           |     |             |            |      |      |                                                                                                                                                                                                                                                                                                                                                                                                                                                                                                                                                                                                                                        |           |           |           |           |           |     |             |            |      |      |                                                                                                                                                                                                                                                                                                                                                                                                                                                                                                                                                                                                                                        |           |           |           |           |           |     |             |            |      |      |                                                                                                                                                                                                                                                                                                                                                                                                                                                                                                                                                                                                                                        |           |           |           |           |           |     |             |            |      |      |                                                                                                                                                                                                                                                                                                                                                                                                                                                                                                                                                                                                                                        |           |           |           |           |           |     |             |            |      |      |                                                                                                                                                                                                                                                                                                                                                                                                                                                                                                                                                                                                                                        |           |           |           |           |           |     |             |            |      |      |                                                                                                                                                                                                                                                                                                                                                                                                                                                                                                  |           |           |           |           |           |     |             |            |      |      |                                                                                                                                                                                                                                                                                                                                                                                                                                                                                                  |           |           |           |           |           |     |             |            |      |      |                                                                                                                                                                                                                                                                                                                                                                                                                                                                                                  |          |           |           |           |           |     |             |            |      |      |                                                                                                                                                                                                                                                                                                                                                                                                                                                                                                  |        |           |           |          |           |     |            |            |      |      |                                                                                                                                                                                                                                                                                                                                                                                                                                                                                                  |
| gb NM_008155.1 DB_XREF=gi:6680086 GEN=Sp11 FEA=FLmRNA CNT=26 TID=Mm.588.1 TIER=FL STK=2 UG=Mm.588.1 LL=14751 DEF=Mus musculus glucose phosphate isomerase 1 complex (Sp1), mRNA. /PROD=glucose phosphate isomerase 1 complex FL-gb MI4220.1 gb NM_008155.1                                                                                                                                                                                                                                                                                                                                                                                                | 6017.467   | 1636.3217 | 3145.5999 | 981.9437  | 2.6065686 | 3.0 | 0.07992121  | 0.27520037 | 0.52 | 1.91 |                                                                                                                                                                                                                                                                                                                                                                                                                                                                                                                                                                                                                                                           |           |           |           |           |           |     |             |            |      |      |                                                                                                                                                                                                                                                                                                                                                                                                                                                                                                                                                                                                                                                           |           |           |           |           |           |     |             |            |      |      |                                                                                                                                                                                                                                                                                                                                                                                                                                                                                                                                                                                                                                        |           |           |           |           |           |     |             |            |      |      |                                                                                                                                                                                                                                                                                                                                                                                                                                                                                                                                                                                                                                        |           |           |           |           |           |     |             |            |      |      |                                                                                                                                                                                                                                                                                                                                                                                                                                                                                                                                                                                                                                        |           |           |           |           |           |     |             |            |      |      |                                                                                                                                                                                                                                                                                                                                                                                                                                                                                                                                                                                                                                        |           |           |           |           |           |     |             |            |      |      |                                                                                                                                                                                                                                                                                                                                                                                                                                                                                                                                                                                                                                        |           |           |           |           |           |     |             |            |      |      |                                                                                                                                                                                                                                                                                                                                                                                                                                                                                                                                                                                                                                        |           |           |           |           |           |     |             |            |      |      |                                                                                                                                                                                                                                                                                                                                                                                                                                                                                                                                                                                                                                        |           |           |           |           |           |     |             |            |      |      |                                                                                                                                                                                                                                                                                                                                                                                                                                                                                                                                                                                                                                        |           |           |           |           |           |     |             |            |      |      |                                                                                                                                                                                                                                                                                                                                                                                                                                                                                                                                                                                                                                        |           |           |           |           |           |     |             |            |      |      |                                                                                                                                                                                                                                                                                                                                                                                                                                                                                                                                                                                                                                        |           |           |           |           |           |     |             |            |      |      |                                                                                                                                                                                                                                                                                                                                                                                                                                                                                                                                                                                                                                        |           |           |           |           |           |     |             |            |      |      |                                                                                                                                                                                                                                                                                                                                                                                                                                                                                                  |           |           |           |           |           |     |             |            |      |      |                                                                                                                                                                                                                                                                                                                                                                                                                                                                                                  |           |           |           |           |           |     |             |            |      |      |                                                                                                                                                                                                                                                                                                                                                                                                                                                                                                  |          |           |           |           |           |     |             |            |      |      |                                                                                                                                                                                                                                                                                                                                                                                                                                                                                                  |        |           |           |          |           |     |            |            |      |      |                                                                                                                                                                                                                                                                                                                                                                                                                                                                                                  |
| gb U48800.1 DB_XREF=gi:1234824 GEN=VEGF-B FEA=FLmRNA CNT=77 TID=Mm.15807.2 TIER=FL STK=1 UG=Mm.15807.1 LL=22340 DEF=Mus musculus vascular endothelial growth factor B precursor (VEGF-B) mRNA, complete cds. /PROD=vascular endothelial growth factor B precursor FL-gb NM_043837.1 gb U48800.1                                                                                                                                                                                                                                                                                                                                                           | 3644.2334  | 921.23413 | 1713.7333 | 417.65958 | 3.3057415 | 2.0 | 0.08060011  | 0.2749443  | 0.47 | 2.13 |                                                                                                                                                                                                                                                                                                                                                                                                                                                                                                                                                                                                                                                           |           |           |           |           |           |     |             |            |      |      |                                                                                                                                                                                                                                                                                                                                                                                                                                                                                                                                                                                                                                                           |           |           |           |           |           |     |             |            |      |      |                                                                                                                                                                                                                                                                                                                                                                                                                                                                                                                                                                                                                                        |           |           |           |           |           |     |             |            |      |      |                                                                                                                                                                                                                                                                                                                                                                                                                                                                                                                                                                                                                                        |           |           |           |           |           |     |             |            |      |      |                                                                                                                                                                                                                                                                                                                                                                                                                                                                                                                                                                                                                                        |           |           |           |           |           |     |             |            |      |      |                                                                                                                                                                                                                                                                                                                                                                                                                                                                                                                                                                                                                                        |           |           |           |           |           |     |             |            |      |      |                                                                                                                                                                                                                                                                                                                                                                                                                                                                                                                                                                                                                                        |           |           |           |           |           |     |             |            |      |      |                                                                                                                                                                                                                                                                                                                                                                                                                                                                                                                                                                                                                                        |           |           |           |           |           |     |             |            |      |      |                                                                                                                                                                                                                                                                                                                                                                                                                                                                                                                                                                                                                                        |           |           |           |           |           |     |             |            |      |      |                                                                                                                                                                                                                                                                                                                                                                                                                                                                                                                                                                                                                                        |           |           |           |           |           |     |             |            |      |      |                                                                                                                                                                                                                                                                                                                                                                                                                                                                                                                                                                                                                                        |           |           |           |           |           |     |             |            |      |      |                                                                                                                                                                                                                                                                                                                                                                                                                                                                                                                                                                                                                                        |           |           |           |           |           |     |             |            |      |      |                                                                                                                                                                                                                                                                                                                                                                                                                                                                                                                                                                                                                                        |           |           |           |           |           |     |             |            |      |      |                                                                                                                                                                                                                                                                                                                                                                                                                                                                                                  |           |           |           |           |           |     |             |            |      |      |                                                                                                                                                                                                                                                                                                                                                                                                                                                                                                  |           |           |           |           |           |     |             |            |      |      |                                                                                                                                                                                                                                                                                                                                                                                                                                                                                                  |          |           |           |           |           |     |             |            |      |      |                                                                                                                                                                                                                                                                                                                                                                                                                                                                                                  |        |           |           |          |           |     |            |            |      |      |                                                                                                                                                                                                                                                                                                                                                                                                                                                                                                  |
| gb NM_130811.1 DB_XREF=gi:18700010 GEN=MGC6685 FEA=FLmRNA CNT=43 TID=Mm.12267.1 TIER=FL STK=2 UG=Mm.12267.1 LL=177075 DEF=Mus musculus similar to poly(A)-binding protein, cytoplasmic 4 (inducible form) (MGC6685), mRNA. /PROD=similar to poly(A)-binding protein, cytoplasmic (inducible form) FL-gb NM_130811.1 gb BC003283.1                                                                                                                                                                                                                                                                                                                         | 2363.5667  | 555.67523 | 1319.0    | 424.0053  | 2.5884504 | 3.0 | 0.081182934 | 0.27436823 | 0.56 | 1.79 |                                                                                                                                                                                                                                                                                                                                                                                                                                                                                                                                                                                                                                                           |           |           |           |           |           |     |             |            |      |      |                                                                                                                                                                                                                                                                                                                                                                                                                                                                                                                                                                                                                                                           |           |           |           |           |           |     |             |            |      |      |                                                                                                                                                                                                                                                                                                                                                                                                                                                                                                                                                                                                                                        |           |           |           |           |           |     |             |            |      |      |                                                                                                                                                                                                                                                                                                                                                                                                                                                                                                                                                                                                                                        |           |           |           |           |           |     |             |            |      |      |                                                                                                                                                                                                                                                                                                                                                                                                                                                                                                                                                                                                                                        |           |           |           |           |           |     |             |            |      |      |                                                                                                                                                                                                                                                                                                                                                                                                                                                                                                                                                                                                                                        |           |           |           |           |           |     |             |            |      |      |                                                                                                                                                                                                                                                                                                                                                                                                                                                                                                                                                                                                                                        |           |           |           |           |           |     |             |            |      |      |                                                                                                                                                                                                                                                                                                                                                                                                                                                                                                                                                                                                                                        |           |           |           |           |           |     |             |            |      |      |                                                                                                                                                                                                                                                                                                                                                                                                                                                                                                                                                                                                                                        |           |           |           |           |           |     |             |            |      |      |                                                                                                                                                                                                                                                                                                                                                                                                                                                                                                                                                                                                                                        |           |           |           |           |           |     |             |            |      |      |                                                                                                                                                                                                                                                                                                                                                                                                                                                                                                                                                                                                                                        |           |           |           |           |           |     |             |            |      |      |                                                                                                                                                                                                                                                                                                                                                                                                                                                                                                                                                                                                                                        |           |           |           |           |           |     |             |            |      |      |                                                                                                                                                                                                                                                                                                                                                                                                                                                                                                                                                                                                                                        |           |           |           |           |           |     |             |            |      |      |                                                                                                                                                                                                                                                                                                                                                                                                                                                                                                  |           |           |           |           |           |     |             |            |      |      |                                                                                                                                                                                                                                                                                                                                                                                                                                                                                                  |           |           |           |           |           |     |             |            |      |      |                                                                                                                                                                                                                                                                                                                                                                                                                                                                                                  |          |           |           |           |           |     |             |            |      |      |                                                                                                                                                                                                                                                                                                                                                                                                                                                                                                  |        |           |           |          |           |     |            |            |      |      |                                                                                                                                                                                                                                                                                                                                                                                                                                                                                                  |
| gb NM_130864.1 DB_XREF=gi:18700003 GEN=PCAB2 FEA=FLmRNA CNT=1237 TID=Mm.205266.1 TIER=FL+Slack STK=602 UG=Mm.205266.1 LL=113866 DEF=Mus musculus acetyl-Coenzyme A acyltransferase (peroxisomal 3-oxoacyl-Coenzyme A thioesterase) (PCAB2), mRNA. /PROD=acetyl-Coenzyme A acyltransferase (peroxisomal 3-oxoacyl-Coenzyme A thioesterase) FL-gb NM_130864.1                                                                                                                                                                                                                                                                                               | 796.2      | 190.25824 | 459.66666 | 122.50037 | 2.5759327 | 3.0 | 0.08206902  | 0.27481827 | 0.58 | 1.73 |                                                                                                                                                                                                                                                                                                                                                                                                                                                                                                                                                                                                                                                           |           |           |           |           |           |     |             |            |      |      |                                                                                                                                                                                                                                                                                                                                                                                                                                                                                                                                                                                                                                                           |           |           |           |           |           |     |             |            |      |      |                                                                                                                                                                                                                                                                                                                                                                                                                                                                                                                                                                                                                                        |           |           |           |           |           |     |             |            |      |      |                                                                                                                                                                                                                                                                                                                                                                                                                                                                                                                                                                                                                                        |           |           |           |           |           |     |             |            |      |      |                                                                                                                                                                                                                                                                                                                                                                                                                                                                                                                                                                                                                                        |           |           |           |           |           |     |             |            |      |      |                                                                                                                                                                                                                                                                                                                                                                                                                                                                                                                                                                                                                                        |           |           |           |           |           |     |             |            |      |      |                                                                                                                                                                                                                                                                                                                                                                                                                                                                                                                                                                                                                                        |           |           |           |           |           |     |             |            |      |      |                                                                                                                                                                                                                                                                                                                                                                                                                                                                                                                                                                                                                                        |           |           |           |           |           |     |             |            |      |      |                                                                                                                                                                                                                                                                                                                                                                                                                                                                                                                                                                                                                                        |           |           |           |           |           |     |             |            |      |      |                                                                                                                                                                                                                                                                                                                                                                                                                                                                                                                                                                                                                                        |           |           |           |           |           |     |             |            |      |      |                                                                                                                                                                                                                                                                                                                                                                                                                                                                                                                                                                                                                                        |           |           |           |           |           |     |             |            |      |      |                                                                                                                                                                                                                                                                                                                                                                                                                                                                                                                                                                                                                                        |           |           |           |           |           |     |             |            |      |      |                                                                                                                                                                                                                                                                                                                                                                                                                                                                                                                                                                                                                                        |           |           |           |           |           |     |             |            |      |      |                                                                                                                                                                                                                                                                                                                                                                                                                                                                                                  |           |           |           |           |           |     |             |            |      |      |                                                                                                                                                                                                                                                                                                                                                                                                                                                                                                  |           |           |           |           |           |     |             |            |      |      |                                                                                                                                                                                                                                                                                                                                                                                                                                                                                                  |          |           |           |           |           |     |             |            |      |      |                                                                                                                                                                                                                                                                                                                                                                                                                                                                                                  |        |           |           |          |           |     |            |            |      |      |                                                                                                                                                                                                                                                                                                                                                                                                                                                                                                  |
| gb BC012400.1 gb BC026669.1                                                                                                                                                                                                                                                                                                                                                                                                                                                                                                                                                                                                                               |            |           |           |           |           |     |             |            |      |      |                                                                                                                                                                                                                                                                                                                                                                                                                                                                                                                                                                                                                                                           |           |           |           |           |           |     |             |            |      |      |                                                                                                                                                                                                                                                                                                                                                                                                                                                                                                                                                                                                                                                           |           |           |           |           |           |     |             |            |      |      |                                                                                                                                                                                                                                                                                                                                                                                                                                                                                                                                                                                                                                        |           |           |           |           |           |     |             |            |      |      |                                                                                                                                                                                                                                                                                                                                                                                                                                                                                                                                                                                                                                        |           |           |           |           |           |     |             |            |      |      |                                                                                                                                                                                                                                                                                                                                                                                                                                                                                                                                                                                                                                        |           |           |           |           |           |     |             |            |      |      |                                                                                                                                                                                                                                                                                                                                                                                                                                                                                                                                                                                                                                        |           |           |           |           |           |     |             |            |      |      |                                                                                                                                                                                                                                                                                                                                                                                                                                                                                                                                                                                                                                        |           |           |           |           |           |     |             |            |      |      |                                                                                                                                                                                                                                                                                                                                                                                                                                                                                                                                                                                                                                        |           |           |           |           |           |     |             |            |      |      |                                                                                                                                                                                                                                                                                                                                                                                                                                                                                                                                                                                                                                        |           |           |           |           |           |     |             |            |      |      |                                                                                                                                                                                                                                                                                                                                                                                                                                                                                                                                                                                                                                        |           |           |           |           |           |     |             |            |      |      |                                                                                                                                                                                                                                                                                                                                                                                                                                                                                                                                                                                                                                        |           |           |           |           |           |     |             |            |      |      |                                                                                                                                                                                                                                                                                                                                                                                                                                                                                                                                                                                                                                        |           |           |           |           |           |     |             |            |      |      |                                                                                                                                                                                                                                                                                                                                                                                                                                                                                                                                                                                                                                        |           |           |           |           |           |     |             |            |      |      |                                                                                                                                                                                                                                                                                                                                                                                                                                                                                                  |           |           |           |           |           |     |             |            |      |      |                                                                                                                                                                                                                                                                                                                                                                                                                                                                                                  |           |           |           |           |           |     |             |            |      |      |                                                                                                                                                                                                                                                                                                                                                                                                                                                                                                  |          |           |           |           |           |     |             |            |      |      |                                                                                                                                                                                                                                                                                                                                                                                                                                                                                                  |        |           |           |          |           |     |            |            |      |      |                                                                                                                                                                                                                                                                                                                                                                                                                                                                                                  |
| gb AK003239.1 DB_XREF=gi:12833782 FEA=FLmRNA CNT=199 TID=Mm.34244.1 TIER=Slack STK=14 UG=Mm.34244.1 LL=67458 UG_GENE=1200007D18Rk UG_TITLE=RIKEN cDNA 1200007D18 gene (DEF=Mus musculus 18 days embryo whole body cDNA, RIKEN full-length enriched library, clone:1110001K09 homolog to KIAA1181 PROTEIN (FRAGMENT)), full insert sequence. /FL-gb NM_026170.1 gb BC005516.1                                                                                                                                                                                                                                                                              | 510.6      | 123.16634 | 300.93335 | 69.6006   | 2.5669823 | 3.0 | 0.08270989  | 0.27444646 | 0.59 | 1.7  |                                                                                                                                                                                                                                                                                                                                                                                                                                                                                                                                                                                                                                                           |           |           |           |           |           |     |             |            |      |      |                                                                                                                                                                                                                                                                                                                                                                                                                                                                                                                                                                                                                                                           |           |           |           |           |           |     |             |            |      |      |                                                                                                                                                                                                                                                                                                                                                                                                                                                                                                                                                                                                                                        |           |           |           |           |           |     |             |            |      |      |                                                                                                                                                                                                                                                                                                                                                                                                                                                                                                                                                                                                                                        |           |           |           |           |           |     |             |            |      |      |                                                                                                                                                                                                                                                                                                                                                                                                                                                                                                                                                                                                                                        |           |           |           |           |           |     |             |            |      |      |                                                                                                                                                                                                                                                                                                                                                                                                                                                                                                                                                                                                                                        |           |           |           |           |           |     |             |            |      |      |                                                                                                                                                                                                                                                                                                                                                                                                                                                                                                                                                                                                                                        |           |           |           |           |           |     |             |            |      |      |                                                                                                                                                                                                                                                                                                                                                                                                                                                                                                                                                                                                                                        |           |           |           |           |           |     |             |            |      |      |                                                                                                                                                                                                                                                                                                                                                                                                                                                                                                                                                                                                                                        |           |           |           |           |           |     |             |            |      |      |                                                                                                                                                                                                                                                                                                                                                                                                                                                                                                                                                                                                                                        |           |           |           |           |           |     |             |            |      |      |                                                                                                                                                                                                                                                                                                                                                                                                                                                                                                                                                                                                                                        |           |           |           |           |           |     |             |            |      |      |                                                                                                                                                                                                                                                                                                                                                                                                                                                                                                                                                                                                                                        |           |           |           |           |           |     |             |            |      |      |                                                                                                                                                                                                                                                                                                                                                                                                                                                                                                                                                                                                                                        |           |           |           |           |           |     |             |            |      |      |                                                                                                                                                                                                                                                                                                                                                                                                                                                                                                  |           |           |           |           |           |     |             |            |      |      |                                                                                                                                                                                                                                                                                                                                                                                                                                                                                                  |           |           |           |           |           |     |             |            |      |      |                                                                                                                                                                                                                                                                                                                                                                                                                                                                                                  |          |           |           |           |           |     |             |            |      |      |                                                                                                                                                                                                                                                                                                                                                                                                                                                                                                  |        |           |           |          |           |     |            |            |      |      |                                                                                                                                                                                                                                                                                                                                                                                                                                                                                                  |
| gb NM_053082.1 DB_XREF=gi:16718364 GEN=Tm4d7 FEA=FLmRNA CNT=147 TID=Mm.195408.1 TIER=FL+Slack STK=105 UG=Mm.195498 LL=20524 DEF=Mus musculus transmembrane 4 superfamily member 7 (Tm4d7), mRNA. /PROD=transmembrane 4 superfamily member 7 FL-gb NM_053082.1 gb BC003482.1                                                                                                                                                                                                                                                                                                                                                                               | 1432.9668  | 371.01614 | 723.1333  | 83.90889  | 3.2321563 | 2.0 | 0.083857775 | 0.27574852 | 0.5  | 1.98 |                                                                                                                                                                                                                                                                                                                                                                                                                                                                                                                                                                                                                                                           |           |           |           |           |           |     |             |            |      |      |                                                                                                                                                                                                                                                                                                                                                                                                                                                                                                                                                                                                                                                           |           |           |           |           |           |     |             |            |      |      |                                                                                                                                                                                                                                                                                                                                                                                                                                                                                                                                                                                                                                        |           |           |           |           |           |     |             |            |      |      |                                                                                                                                                                                                                                                                                                                                                                                                                                                                                                                                                                                                                                        |           |           |           |           |           |     |             |            |      |      |                                                                                                                                                                                                                                                                                                                                                                                                                                                                                                                                                                                                                                        |           |           |           |           |           |     |             |            |      |      |                                                                                                                                                                                                                                                                                                                                                                                                                                                                                                                                                                                                                                        |           |           |           |           |           |     |             |            |      |      |                                                                                                                                                                                                                                                                                                                                                                                                                                                                                                                                                                                                                                        |           |           |           |           |           |     |             |            |      |      |                                                                                                                                                                                                                                                                                                                                                                                                                                                                                                                                                                                                                                        |           |           |           |           |           |     |             |            |      |      |                                                                                                                                                                                                                                                                                                                                                                                                                                                                                                                                                                                                                                        |           |           |           |           |           |     |             |            |      |      |                                                                                                                                                                                                                                                                                                                                                                                                                                                                                                                                                                                                                                        |           |           |           |           |           |     |             |            |      |      |                                                                                                                                                                                                                                                                                                                                                                                                                                                                                                                                                                                                                                        |           |           |           |           |           |     |             |            |      |      |                                                                                                                                                                                                                                                                                                                                                                                                                                                                                                                                                                                                                                        |           |           |           |           |           |     |             |            |      |      |                                                                                                                                                                                                                                                                                                                                                                                                                                                                                                                                                                                                                                        |           |           |           |           |           |     |             |            |      |      |                                                                                                                                                                                                                                                                                                                                                                                                                                                                                                  |           |           |           |           |           |     |             |            |      |      |                                                                                                                                                                                                                                                                                                                                                                                                                                                                                                  |           |           |           |           |           |     |             |            |      |      |                                                                                                                                                                                                                                                                                                                                                                                                                                                                                                  |          |           |           |           |           |     |             |            |      |      |                                                                                                                                                                                                                                                                                                                                                                                                                                                                                                  |        |           |           |          |           |     |            |            |      |      |                                                                                                                                                                                                                                                                                                                                                                                                                                                                                                  |
| gb NM_015816.1 DB_XREF=gi:7454381 FEA=FLmRNA CNT=133 TID=Mm.14585.1 TIER=FL+Slack STK=52 UG=Mm.14585.1 LL=50783 DEF=Mus musculus U6 snRNA-associated SM-like protein 4 (Lsm4-pending), mRNA. /PROD=U6 snRNA-associated SM-like protein 4 FL-gb NM_015816.1 gb BC026747.1                                                                                                                                                                                                                                                                                                                                                                                  | 2082.0667  | 419.71677 | 1322.8334 | 300.10544 | 2.5486553 | 3.0 | 0.08404149  | 0.27388522 | 0.64 | 1.57 |                                                                                                                                                                                                                                                                                                                                                                                                                                                                                                                                                                                                                                                           |           |           |           |           |           |     |             |            |      |      |                                                                                                                                                                                                                                                                                                                                                                                                                                                                                                                                                                                                                                                           |           |           |           |           |           |     |             |            |      |      |                                                                                                                                                                                                                                                                                                                                                                                                                                                                                                                                                                                                                                        |           |           |           |           |           |     |             |            |      |      |                                                                                                                                                                                                                                                                                                                                                                                                                                                                                                                                                                                                                                        |           |           |           |           |           |     |             |            |      |      |                                                                                                                                                                                                                                                                                                                                                                                                                                                                                                                                                                                                                                        |           |           |           |           |           |     |             |            |      |      |                                                                                                                                                                                                                                                                                                                                                                                                                                                                                                                                                                                                                                        |           |           |           |           |           |     |             |            |      |      |                                                                                                                                                                                                                                                                                                                                                                                                                                                                                                                                                                                                                                        |           |           |           |           |           |     |             |            |      |      |                                                                                                                                                                                                                                                                                                                                                                                                                                                                                                                                                                                                                                        |           |           |           |           |           |     |             |            |      |      |                                                                                                                                                                                                                                                                                                                                                                                                                                                                                                                                                                                                                                        |           |           |           |           |           |     |             |            |      |      |                                                                                                                                                                                                                                                                                                                                                                                                                                                                                                                                                                                                                                        |           |           |           |           |           |     |             |            |      |      |                                                                                                                                                                                                                                                                                                                                                                                                                                                                                                                                                                                                                                        |           |           |           |           |           |     |             |            |      |      |                                                                                                                                                                                                                                                                                                                                                                                                                                                                                                                                                                                                                                        |           |           |           |           |           |     |             |            |      |      |                                                                                                                                                                                                                                                                                                                                                                                                                                                                                                                                                                                                                                        |           |           |           |           |           |     |             |            |      |      |                                                                                                                                                                                                                                                                                                                                                                                                                                                                                                  |           |           |           |           |           |     |             |            |      |      |                                                                                                                                                                                                                                                                                                                                                                                                                                                                                                  |           |           |           |           |           |     |             |            |      |      |                                                                                                                                                                                                                                                                                                                                                                                                                                                                                                  |          |           |           |           |           |     |             |            |      |      |                                                                                                                                                                                                                                                                                                                                                                                                                                                                                                  |        |           |           |          |           |     |            |            |      |      |                                                                                                                                                                                                                                                                                                                                                                                                                                                                                                  |
| gb NM_009045.1 DB_XREF=gi:6677708 GEN=Raga FEA=FLmRNA CNT=10 TID=Mm.28170.1 TIER=FL+Slack STK=9 UG=Mm.28170.1 LL=19687 DEF=Mus musculus v-rel reticulendotheliosis viral oncogene homolog A, (avian) (Rela), mRNA. /PROD=avian reticulendotheliosis viral oncogene homolog A FL-gb NM_009045.1 gb BC01909.1                                                                                                                                                                                                                                                                                                                                               | 1960.0332  | 383.5544  | 1213.4333 | 334.97433 | 2.5393877 | 3.0 | 0.08472489  | 0.2736689  | 0.62 | 1.62 |                                                                                                                                                                                                                                                                                                                                                                                                                                                                                                                                                                                                                                                           |           |           |           |           |           |     |             |            |      |      |                                                                                                                                                                                                                                                                                                                                                                                                                                                                                                                                                                                                                                                           |           |           |           |           |           |     |             |            |      |      |                                                                                                                                                                                                                                                                                                                                                                                                                                                                                                                                                                                                                                        |           |           |           |           |           |     |             |            |      |      |                                                                                                                                                                                                                                                                                                                                                                                                                                                                                                                                                                                                                                        |           |           |           |           |           |     |             |            |      |      |                                                                                                                                                                                                                                                                                                                                                                                                                                                                                                                                                                                                                                        |           |           |           |           |           |     |             |            |      |      |                                                                                                                                                                                                                                                                                                                                                                                                                                                                                                                                                                                                                                        |           |           |           |           |           |     |             |            |      |      |                                                                                                                                                                                                                                                                                                                                                                                                                                                                                                                                                                                                                                        |           |           |           |           |           |     |             |            |      |      |                                                                                                                                                                                                                                                                                                                                                                                                                                                                                                                                                                                                                                        |           |           |           |           |           |     |             |            |      |      |                                                                                                                                                                                                                                                                                                                                                                                                                                                                                                                                                                                                                                        |           |           |           |           |           |     |             |            |      |      |                                                                                                                                                                                                                                                                                                                                                                                                                                                                                                                                                                                                                                        |           |           |           |           |           |     |             |            |      |      |                                                                                                                                                                                                                                                                                                                                                                                                                                                                                                                                                                                                                                        |           |           |           |           |           |     |             |            |      |      |                                                                                                                                                                                                                                                                                                                                                                                                                                                                                                                                                                                                                                        |           |           |           |           |           |     |             |            |      |      |                                                                                                                                                                                                                                                                                                                                                                                                                                                                                                                                                                                                                                        |           |           |           |           |           |     |             |            |      |      |                                                                                                                                                                                                                                                                                                                                                                                                                                                                                                  |           |           |           |           |           |     |             |            |      |      |                                                                                                                                                                                                                                                                                                                                                                                                                                                                                                  |           |           |           |           |           |     |             |            |      |      |                                                                                                                                                                                                                                                                                                                                                                                                                                                                                                  |          |           |           |           |           |     |             |            |      |      |                                                                                                                                                                                                                                                                                                                                                                                                                                                                                                  |        |           |           |          |           |     |            |            |      |      |                                                                                                                                                                                                                                                                                                                                                                                                                                                                                                  |
| gb NM_011125.1 DB_XREF=gi:6755111 GEN=Plp FEA=FLmRNA CNT=67 TID=Mm.8105.1 TIER=FL+Slack STK=32 UG=Mm.8105.1 LL=18830 DEF=Mus musculus phospholipid transfer protein (Plp), mRNA. /PROD=phospholipid transfer protein (Plp) FL-gb BC003782.1                                                                                                                                                                                                                                                                                                                                                                                                               | 2012.7001  | 384.84665 | 1234.1333 | 370.92523 | 2.5229409 | 3.0 | 0.08594584  | 0.27520546 | 0.61 | 1.63 |                                                                                                                                                                                                                                                                                                                                                                                                                                                                                                                                                                                                                                                           |           |           |           |           |           |     |             |            |      |      |                                                                                                                                                                                                                                                                                                                                                                                                                                                                                                                                                                                                                                                           |           |           |           |           |           |     |             |            |      |      |                                                                                                                                                                                                                                                                                                                                                                                                                                                                                                                                                                                                                                        |           |           |           |           |           |     |             |            |      |      |                                                                                                                                                                                                                                                                                                                                                                                                                                                                                                                                                                                                                                        |           |           |           |           |           |     |             |            |      |      |                                                                                                                                                                                                                                                                                                                                                                                                                                                                                                                                                                                                                                        |           |           |           |           |           |     |             |            |      |      |                                                                                                                                                                                                                                                                                                                                                                                                                                                                                                                                                                                                                                        |           |           |           |           |           |     |             |            |      |      |                                                                                                                                                                                                                                                                                                                                                                                                                                                                                                                                                                                                                                        |           |           |           |           |           |     |             |            |      |      |                                                                                                                                                                                                                                                                                                                                                                                                                                                                                                                                                                                                                                        |           |           |           |           |           |     |             |            |      |      |                                                                                                                                                                                                                                                                                                                                                                                                                                                                                                                                                                                                                                        |           |           |           |           |           |     |             |            |      |      |                                                                                                                                                                                                                                                                                                                                                                                                                                                                                                                                                                                                                                        |           |           |           |           |           |     |             |            |      |      |                                                                                                                                                                                                                                                                                                                                                                                                                                                                                                                                                                                                                                        |           |           |           |           |           |     |             |            |      |      |                                                                                                                                                                                                                                                                                                                                                                                                                                                                                                                                                                                                                                        |           |           |           |           |           |     |             |            |      |      |                                                                                                                                                                                                                                                                                                                                                                                                                                                                                                                                                                                                                                        |           |           |           |           |           |     |             |            |      |      |                                                                                                                                                                                                                                                                                                                                                                                                                                                                                                  |           |           |           |           |           |     |             |            |      |      |                                                                                                                                                                                                                                                                                                                                                                                                                                                                                                  |           |           |           |           |           |     |             |            |      |      |                                                                                                                                                                                                                                                                                                                                                                                                                                                                                                  |          |           |           |           |           |     |             |            |      |      |                                                                                                                                                                                                                                                                                                                                                                                                                                                                                                  |        |           |           |          |           |     |            |            |      |      |                                                                                                                                                                                                                                                                                                                                                                                                                                                                                                  |
| gb NM_008155.1 DB_XREF=gi:6680086 GEN=Sp11 FEA=FLmRNA CNT=26 TID=Mm.588.1 TIER=FL STK=2 UG=Mm.588.1 LL=14751 DEF=Mus musculus glucose phosphate isomerase 1 complex (Sp1), mRNA. /PROD=glucose phosphate isomerase 1 complex FL-gb MI4220.1 gb NM_008155.1                                                                                                                                                                                                                                                                                                                                                                                                | 8020.0     | 2118.5437 | 4423.6665 | 1272.875  | 2.5203187 | 3.0 | 0.08615266  | 0.27344105 | 0.55 | 1.81 |                                                                                                                                                                                                                                                                                                                                                                                                                                                                                                                                                                                                                                                           |           |           |           |           |           |     |             |            |      |      |                                                                                                                                                                                                                                                                                                                                                                                                                                                                                                                                                                                                                                                           |           |           |           |           |           |     |             |            |      |      |                                                                                                                                                                                                                                                                                                                                                                                                                                                                                                                                                                                                                                        |           |           |           |           |           |     |             |            |      |      |                                                                                                                                                                                                                                                                                                                                                                                                                                                                                                                                                                                                                                        |           |           |           |           |           |     |             |            |      |      |                                                                                                                                                                                                                                                                                                                                                                                                                                                                                                                                                                                                                                        |           |           |           |           |           |     |             |            |      |      |                                                                                                                                                                                                                                                                                                                                                                                                                                                                                                                                                                                                                                        |           |           |           |           |           |     |             |            |      |      |                                                                                                                                                                                                                                                                                                                                                                                                                                                                                                                                                                                                                                        |           |           |           |           |           |     |             |            |      |      |                                                                                                                                                                                                                                                                                                                                                                                                                                                                                                                                                                                                                                        |           |           |           |           |           |     |             |            |      |      |                                                                                                                                                                                                                                                                                                                                                                                                                                                                                                                                                                                                                                        |           |           |           |           |           |     |             |            |      |      |                                                                                                                                                                                                                                                                                                                                                                                                                                                                                                                                                                                                                                        |           |           |           |           |           |     |             |            |      |      |                                                                                                                                                                                                                                                                                                                                                                                                                                                                                                                                                                                                                                        |           |           |           |           |           |     |             |            |      |      |                                                                                                                                                                                                                                                                                                                                                                                                                                                                                                                                                                                                                                        |           |           |           |           |           |     |             |            |      |      |                                                                                                                                                                                                                                                                                                                                                                                                                                                                                                                                                                                                                                        |           |           |           |           |           |     |             |            |      |      |                                                                                                                                                                                                                                                                                                                                                                                                                                                                                                  |           |           |           |           |           |     |             |            |      |      |                                                                                                                                                                                                                                                                                                                                                                                                                                                                                                  |           |           |           |           |           |     |             |            |      |      |                                                                                                                                                                                                                                                                                                                                                                                                                                                                                                  |          |           |           |           |           |     |             |            |      |      |                                                                                                                                                                                                                                                                                                                                                                                                                                                                                                  |        |           |           |          |           |     |            |            |      |      |                                                                                                                                                                                                                                                                                                                                                                                                                                                                                                  |
| gb NM_025529.1 DB_XREF=gi:13384949 GEN=Z1310039H17Rk FEA=FLmRNA CNT=18 TID=Mm.44092.1 TIER=FL STK=2 UG=Mm.44092.1 LL=6837 DEF=Mus musculus RIKEN cDNA Z1310039H17 gene (Z1310039H17Rk), mRNA. /PROD=transmembrane cDNA Z1310039H17 FL-gb NM_025529.1                                                                                                                                                                                                                                                                                                                                                                                                      | 3700.1335  | 1125.2148 | 1606.6998 | 191.09187 | 3.1769488 | 2.0 | 0.08642728  | 0.27194792 | 0.43 | 2.3  |                                                                                                                                                                                                                                                                                                                                                                                                                                                                                                                                                                                                                                                           |           |           |           |           |           |     |             |            |      |      |                                                                                                                                                                                                                                                                                                                                                                                                                                                                                                                                                                                                                                                           |           |           |           |           |           |     |             |            |      |      |                                                                                                                                                                                                                                                                                                                                                                                                                                                                                                                                                                                                                                        |           |           |           |           |           |     |             |            |      |      |                                                                                                                                                                                                                                                                                                                                                                                                                                                                                                                                                                                                                                        |           |           |           |           |           |     |             |            |      |      |                                                                                                                                                                                                                                                                                                                                                                                                                                                                                                                                                                                                                                        |           |           |           |           |           |     |             |            |      |      |                                                                                                                                                                                                                                                                                                                                                                                                                                                                                                                                                                                                                                        |           |           |           |           |           |     |             |            |      |      |                                                                                                                                                                                                                                                                                                                                                                                                                                                                                                                                                                                                                                        |           |           |           |           |           |     |             |            |      |      |                                                                                                                                                                                                                                                                                                                                                                                                                                                                                                                                                                                                                                        |           |           |           |           |           |     |             |            |      |      |                                                                                                                                                                                                                                                                                                                                                                                                                                                                                                                                                                                                                                        |           |           |           |           |           |     |             |            |      |      |                                                                                                                                                                                                                                                                                                                                                                                                                                                                                                                                                                                                                                        |           |           |           |           |           |     |             |            |      |      |                                                                                                                                                                                                                                                                                                                                                                                                                                                                                                                                                                                                                                        |           |           |           |           |           |     |             |            |      |      |                                                                                                                                                                                                                                                                                                                                                                                                                                                                                                                                                                                                                                        |           |           |           |           |           |     |             |            |      |      |                                                                                                                                                                                                                                                                                                                                                                                                                                                                                                                                                                                                                                        |           |           |           |           |           |     |             |            |      |      |                                                                                                                                                                                                                                                                                                                                                                                                                                                                                                  |           |           |           |           |           |     |             |            |      |      |                                                                                                                                                                                                                                                                                                                                                                                                                                                                                                  |           |           |           |           |           |     |             |            |      |      |                                                                                                                                                                                                                                                                                                                                                                                                                                                                                                  |          |           |           |           |           |     |             |            |      |      |                                                                                                                                                                                                                                                                                                                                                                                                                                                                                                  |        |           |           |          |           |     |            |            |      |      |                                                                                                                                                                                                                                                                                                                                                                                                                                                                                                  |
| gb AF072307.1 DB_XREF=gi:6882347 GEN=Unc51.1 FEA=FLmRNA CNT=148 TID=Mm.34216.1 TIER=FL+Slack STK=85 UG=Mm.34216.1 LL=22241 DEF=Mus musculus UNC51.1 serine/threonine kinase (Unc51.1), mRNA, complete cds. /PROD=UNC51.1 serine/threonine kinase FL-gb AF072307.1 gb AF053756.1 gb NM_009469.1                                                                                                                                                                                                                                                                                                                                                            | 983.8667   | 138.9416  | 596.06665 | 228.08847 | 2.514983  | 3.0 | 0.08655745  | 0.27002966 | 0.61 | 1.65 |                                                                                                                                                                                                                                                                                                                                                                                                                                                                                                                                                                                                                                                           |           |           |           |           |           |     |             |            |      |      |                                                                                                                                                                                                                                                                                                                                                                                                                                                                                                                                                                                                                                                           |           |           |           |           |           |     |             |            |      |      |                                                                                                                                                                                                                                                                                                                                                                                                                                                                                                                                                                                                                                        |           |           |           |           |           |     |             |            |      |      |                                                                                                                                                                                                                                                                                                                                                                                                                                                                                                                                                                                                                                        |           |           |           |           |           |     |             |            |      |      |                                                                                                                                                                                                                                                                                                                                                                                                                                                                                                                                                                                                                                        |           |           |           |           |           |     |             |            |      |      |                                                                                                                                                                                                                                                                                                                                                                                                                                                                                                                                                                                                                                        |           |           |           |           |           |     |             |            |      |      |                                                                                                                                                                                                                                                                                                                                                                                                                                                                                                                                                                                                                                        |           |           |           |           |           |     |             |            |      |      |                                                                                                                                                                                                                                                                                                                                                                                                                                                                                                                                                                                                                                        |           |           |           |           |           |     |             |            |      |      |                                                                                                                                                                                                                                                                                                                                                                                                                                                                                                                                                                                                                                        |           |           |           |           |           |     |             |            |      |      |                                                                                                                                                                                                                                                                                                                                                                                                                                                                                                                                                                                                                                        |           |           |           |           |           |     |             |            |      |      |                                                                                                                                                                                                                                                                                                                                                                                                                                                                                                                                                                                                                                        |           |           |           |           |           |     |             |            |      |      |                                                                                                                                                                                                                                                                                                                                                                                                                                                                                                                                                                                                                                        |           |           |           |           |           |     |             |            |      |      |                                                                                                                                                                                                                                                                                                                                                                                                                                                                                                                                                                                                                                        |           |           |           |           |           |     |             |            |      |      |                                                                                                                                                                                                                                                                                                                                                                                                                                                                                                  |           |           |           |           |           |     |             |            |      |      |                                                                                                                                                                                                                                                                                                                                                                                                                                                                                                  |           |           |           |           |           |     |             |            |      |      |                                                                                                                                                                                                                                                                                                                                                                                                                                                                                                  |          |           |           |           |           |     |             |            |      |      |                                                                                                                                                                                                                                                                                                                                                                                                                                                                                                  |        |           |           |          |           |     |            |            |      |      |                                                                                                                                                                                                                                                                                                                                                                                                                                                                                                  |
| gb AB054000.1 DB_XREF=gi:14017772 GEN=Cg10671-like FEA=FLmRNA CNT=35 TID=Mm.36758.1 TIER=FL+Slack STK=15 UG=Mm.36758.1 LL=66880 DEF=Mus musculus Cg10671-like mRNA, complete cds. /PROD=Cg10671-like FL-gb AB054000.1                                                                                                                                                                                                                                                                                                                                                                                                                                     | 1886.9332  | 390.19482 | 1093.9    | 189.40694 | 3.1668425 | 2.0 | 0.086909845 | 0.2688313  | 0.58 | 1.72 |                                                                                                                                                                                                                                                                                                                                                                                                                                                                                                                                                                                                                                                           |           |           |           |           |           |     |             |            |      |      |                                                                                                                                                                                                                                                                                                                                                                                                                                                                                                                                                                                                                                                           |           |           |           |           |           |     |             |            |      |      |                                                                                                                                                                                                                                                                                                                                                                                                                                                                                                                                                                                                                                        |           |           |           |           |           |     |             |            |      |      |                                                                                                                                                                                                                                                                                                                                                                                                                                                                                                                                                                                                                                        |           |           |           |           |           |     |             |            |      |      |                                                                                                                                                                                                                                                                                                                                                                                                                                                                                                                                                                                                                                        |           |           |           |           |           |     |             |            |      |      |                                                                                                                                                                                                                                                                                                                                                                                                                                                                                                                                                                                                                                        |           |           |           |           |           |     |             |            |      |      |                                                                                                                                                                                                                                                                                                                                                                                                                                                                                                                                                                                                                                        |           |           |           |           |           |     |             |            |      |      |                                                                                                                                                                                                                                                                                                                                                                                                                                                                                                                                                                                                                                        |           |           |           |           |           |     |             |            |      |      |                                                                                                                                                                                                                                                                                                                                                                                                                                                                                                                                                                                                                                        |           |           |           |           |           |     |             |            |      |      |                                                                                                                                                                                                                                                                                                                                                                                                                                                                                                                                                                                                                                        |           |           |           |           |           |     |             |            |      |      |                                                                                                                                                                                                                                                                                                                                                                                                                                                                                                                                                                                                                                        |           |           |           |           |           |     |             |            |      |      |                                                                                                                                                                                                                                                                                                                                                                                                                                                                                                                                                                                                                                        |           |           |           |           |           |     |             |            |      |      |                                                                                                                                                                                                                                                                                                                                                                                                                                                                                                                                                                                                                                        |           |           |           |           |           |     |             |            |      |      |                                                                                                                                                                                                                                                                                                                                                                                                                                                                                                  |           |           |           |           |           |     |             |            |      |      |                                                                                                                                                                                                                                                                                                                                                                                                                                                                                                  |           |           |           |           |           |     |             |            |      |      |                                                                                                                                                                                                                                                                                                                                                                                                                                                                                                  |          |           |           |           |           |     |             |            |      |      |                                                                                                                                                                                                                                                                                                                                                                                                                                                                                                  |        |           |           |          |           |     |            |            |      |      |                                                                                                                                                                                                                                                                                                                                                                                                                                                                                                  |
| gb BC024621.1 DB_XREF=gi:19354257 FEA=FLmRNA CNT=208 TID=Mm.30064.1 TIER=FL+Slack STK=62 UG=Mm.30064.1 LL=56486 UG_GENE=Gabarp DEF=Mus musculus, GABA(A) receptor-associated protein, clone MGC 25654 IMAGE:4459651, mRNA, complete cds. /PROD=GABA(A) receptor-associated protein FL-gb NM_019749.1 gb BC002126.1 gb BC024621.1 gb AF161587.1                                                                                                                                                                                                                                                                                                            | 10245.833  | 2222.5093 | 5753.9663 | 1048.8822 | 3.165773  | 2.0 | 0.086961135 | 0.26672953 | 0.56 | 1.78 |                                                                                                                                                                                                                                                                                                                                                                                                                                                                                                                                                                                                                                                           |           |           |           |           |           |     |             |            |      |      |                                                                                                                                                                                                                                                                                                                                                                                                                                                                                                                                                                                                                                                           |           |           |           |           |           |     |             |            |      |      |                                                                                                                                                                                                                                                                                                                                                                                                                                                                                                                                                                                                                                        |           |           |           |           |           |     |             |            |      |      |                                                                                                                                                                                                                                                                                                                                                                                                                                                                                                                                                                                                                                        |           |           |           |           |           |     |             |            |      |      |                                                                                                                                                                                                                                                                                                                                                                                                                                                                                                                                                                                                                                        |           |           |           |           |           |     |             |            |      |      |                                                                                                                                                                                                                                                                                                                                                                                                                                                                                                                                                                                                                                        |           |           |           |           |           |     |             |            |      |      |                                                                                                                                                                                                                                                                                                                                                                                                                                                                                                                                                                                                                                        |           |           |           |           |           |     |             |            |      |      |                                                                                                                                                                                                                                                                                                                                                                                                                                                                                                                                                                                                                                        |           |           |           |           |           |     |             |            |      |      |                                                                                                                                                                                                                                                                                                                                                                                                                                                                                                                                                                                                                                        |           |           |           |           |           |     |             |            |      |      |                                                                                                                                                                                                                                                                                                                                                                                                                                                                                                                                                                                                                                        |           |           |           |           |           |     |             |            |      |      |                                                                                                                                                                                                                                                                                                                                                                                                                                                                                                                                                                                                                                        |           |           |           |           |           |     |             |            |      |      |                                                                                                                                                                                                                                                                                                                                                                                                                                                                                                                                                                                                                                        |           |           |           |           |           |     |             |            |      |      |                                                                                                                                                                                                                                                                                                                                                                                                                                                                                                                                                                                                                                        |           |           |           |           |           |     |             |            |      |      |                                                                                                                                                                                                                                                                                                                                                                                                                                                                                                  |           |           |           |           |           |     |             |            |      |      |                                                                                                                                                                                                                                                                                                                                                                                                                                                                                                  |           |           |           |           |           |     |             |            |      |      |                                                                                                                                                                                                                                                                                                                                                                                                                                                                                                  |          |           |           |           |           |     |             |            |      |      |                                                                                                                                                                                                                                                                                                                                                                                                                                                                                                  |        |           |           |          |           |     |            |            |      |      |                                                                                                                                                                                                                                                                                                                                                                                                                                                                                                  |
| gb NM_023041.1 DB_XREF=gi:12746415 GEN=Pp1 FEA=FLmRNA CNT=210 TID=Mm.144235.1 TIER=FL STK=1 UG=Mm.144235.1 LL=19298 DEF=Mus musculus peroxisomal fatty acyltransferase protein (Pp1), mRNA. /PROD=peroxisomal fatty acyltransferase protein FL-gb NM_023041.1 gb BC019767.1                                                                                                                                                                                                                                                                                                                                                                               | 883.8      | 254.4808  | 419.06665 | 37.01004  | 3.130145  | 2.0 | 0.0886949   | 0.26755074 | 0.47 | 2.11 | Mus musculus REF=MGC2599 DEF=Mus musculus glyceraldehyde-3-phosphate dehydrogenase mRNA, complete cds LEN=1228 C_5_..._3 represent transcript regions 5 prime, Middle, and 3 prime respectively                                                                                                                                                                                                                                                                                                                                                                                                                                                           | 38164.9   | 9613.984  | 22698.932 | 5409.2744 | 2.4283547 | 3.0 | 0.093467414 | 0.2796361  | 0.59 | 1.68 | gb NM_017393.1 DB_XREF=gi:8393155 GEN=Cp FEA=FLmRNA CNT=134 TID=Mm.15243.1 TIER=FL+Slack STK=78 UG=Mm.15243.1 LL=53895 DEF=Mus musculus caseinolytic protease, ATP-dependent, proteolytic subunit homolog (E. coli) (Cp), mRNA. /PROD=caseinolytic protease, ATP-dependent, proteolytic subunit homolog (E. coli) FL-gb NM_017393.1 gb BC001998.1 gb BC019420.1 DB_XREF=gi:18043845 FEA=FLmRNA CNT=96 TID=Mm.46654.1 TIER=FL+Slack STK=59 UG=Mm.46654.1 LL=19420 DEF=Mus musculus, Similar to chromosome 6 open reading frame 35, clone MGC:30293 IMAGE:5053733, mRNA, complete cds. /PROD=similar to chromosome 6 open reading frame 35 FL-gb BC019420.1 | 1815.1333 | 453.52466 | 927.93335 | 445.7683  | 2.416461  | 3.0 | 0.09446801  | 0.27807117 | 0.51 | 1.96 | gb NM_031888.1 DB_XREF=gi:1394194 GEN=Pp1G FEA=FLmRNA CNT=386 TID=Mm.1970.1 TIER=FL+Slack STK=206 UG=Mm.1970.1 LL=10045 DEF=Mus musculus protein phosphatase 1, catalytic subunit, alpha isoform (Pp1c), mRNA. /PROD=protein phosphatase 1, catalytic subunit, alpha isoform FL-gb U25809.1 gb BC001468.1 gb BC001864.1 DB_XREF=gi:1284269 FEA=FLmRNA CNT=29 TID=Mm.23836.1 TIER=Slack STK=23 UG=Mm.23836.1 LL=70231 UG_GENE=Cn2-pending UG_TITLE=RIKEN cDNA Z1310039H17 gene (DEF=Mus musculus ES cells cDNA, RIKEN full-length enriched library, clone:2410043M02.gtg) assembly stacking protein 2, full insert sequence.            | 537.10004 | 157.27226 | 241.5     | 70.8365   | 2.968276  | 2.0 | 0.0972279   | 0.28165224 | 0.45 | 2.22 | gb BC002073.1 DB_XREF=gi:12805224 FEA=FLmRNA CNT=1111 TID=Mm.137.1 TIER=FL+Slack STK=50 UG=Mm.137.1 LL=20005 UG_GENE=Soya6 DEF=Mus musculus, clone MGC 8215 IMAGE:3492808, mRNA, complete cds. /PROD=Unknown (protein for MGC 8215) FL-gb NM_009139.1 gb AF128192.1 gb AF128191.1 gb MS8004.1 gb BC002073.1 gb AF128190.1 gb AF128189.1 gb AF128188.1                                                                                                                                                                                                                                                                                  | 1573.6334 | 216.04079 | 988.26666 | 366.27304 | 2.384262  | 3.0 | 0.09724311  | 0.27947822 | 0.63 | 1.59 | gb NM_009519.1 DB_XREF=gi:6678588 GEN=Wr11 FEA=FLmRNA CNT=24 TID=Mm.22182.1 TIER=FL+Slack STK=10 UG=Mm.22182.1 LL=11141 DEF=Mus musculus wingless-related MMTV integration site 11 (Wr11), mRNA. /PROD=wingless-related MMTV integration site 11 FL-gb NM_009519.1                                                                                                                                                                                                                                                                                                                                                                     | 505.4     | 71.000206 | 316.5     | 117.53268 | 2.3827572 | 3.0 | 0.09737522  | 0.27767152 | 0.63 | 1.6  | gb BC026669.1 DB_XREF=gi:1234824 FEA=FLmRNA CNT=77 TID=Mm.15807.2 TIER=FL STK=1 UG=Mm.15807.1 LL=22340 DEF=Mus musculus vascular endothelial growth factor B precursor (VEGF-B) mRNA, complete cds. /PROD=vascular endothelial growth factor B precursor FL-gb NM_043837.1 gb U48800.1                                                                                                                                                                                                                                                                                                                                                 | 3644.2334 | 921.23413 | 1713.7333 | 417.65958 | 3.3057415 | 2.0 | 0.08060011  | 0.2749443  | 0.47 | 2.13 | gb AF151792 UG_GENE=Pp2b1A DEF=Mus musculus, protein phosphatase 2 (formerly 2A), regulatory subunit A (PR 65), alpha isoform, clone MGC:7086 IMAGE:3157293, mRNA, complete cds. /PROD=protein phosphatase 2 (formerly 2A), regulatory subunit A (PR 65), alpha isoform FL-gb NM_016891.1 gb BC006606.1 gb AB021743.1                                                                                                                                                                                                                                                                                                                  | 2269.7334 | 651.43805 | 1033.5333 | 312.80685 | 2.9629393 | 2.0 | 0.097528845 | 0.2759537  | 0.46 | 2.2  | gb AF302138.1 DB_XREF=gi:15420074 FEA=FLmRNA CNT=158 TID=Mm.22029.1 TIER=FL+Slack STK=86 UG=Mm.22029.1 LL=10222 UG_GENE=Hs7 DEF=Mus musculus Hs7-interacting protein kinase mRNAs, complete cds. /PROD=Hs7-interacting protein kinase FL-gb BC18463.1 gb AF302138.1 gb BC004756.1                                                                                                                                                                                                                                                                                                                                                      | 1104.3334 | 297.56613 | 577.73334 | 241.51155 | 2.3799613 | 3.0 | 0.097621255 | 0.27409044 | 0.52 | 1.91 | gb AK008049.1 DB_XREF=gi:12840262 GEN=Mg1 FEA=mRNA CNT=5 TID=Mm.194795.3 TIER=ConsEnd STK=0 UG=Mm.194795.3 LL=23945 UG_TITLE=monoglyceride lipase DEF=Mus musculus adult male testis cDNA, RIKEN full-length enriched library, clone:1700474K monoglyceride lipase, full insert sequence.                                                                                                                                                                                                                                                                                                                                              | 1528.3666 | 498.10037 | 664.73334 | 387.59006 | 2.3701098 | 3.0 | 0.0984942   | 0.27444304 | 0.43 | 2.3  | gb BC021405.1 DB_XREF=gi:13007473 FEA=FLmRNA CNT=557 TID=Mm.1034.1 TIER=FL+Slack STK=330 UG=Mm.1034.1 LL=51792 UG_GENE=Pp2b1A DEF=Mus musculus, protein phosphatase 2 (formerly 2A), regulatory subunit A (PR 65), alpha isoform, clone MGC:7086 IMAGE:3157293, mRNA, complete cds. /PROD=protein phosphatase 2 (formerly 2A), regulatory subunit A (PR 65), alpha isoform FL-gb NM_016891.1 gb BC006606.1 gb AB021743.1                                                                                                                                                                                                               | 1429.6333 | 272.46213 | 914.4666  | 261.58444 | 2.362404  | 3.0 | 0.099183634 | 0.27425778 | 0.64 | 1.56 | gb BM196939 DB_XREF=gi:17748959 DB_XREF=0304006.3 CLONE=0304006.3 FEA=mRNA CNT=57 TID=Mm.220848.1 TIER=Slack STK=16 UG=Mm.220848 UG_TITLE=Slack DEF=Mus musculus, similar to putative, clone MGC:5345087, mRNA, partial cds. /PROD=Slack FL-gb NM_0207247.1 gb AF128192.1 gb AF128191.1 gb MS8004.1 gb BC002073.1 gb AF128190.1 gb AF128189.1 gb AF128188.1                                                                                                                                                                                                                                                                            | 366.83334 | 48.94613  | 229.76666 | 88.11454  | 2.355309  | 3.0 | 0.09982363  | 0.27395207 | 0.63 | 1.6  | gb NM_023631.1 DB_XREF=gi:12072471 FEA=FLmRNA CNT=119 TID=Mm.21897.1 TIER=FL+Slack STK=30 UG=Mm.21897.1 LL=11923 UG_GENE=Cn2-pending UG_TITLE=RIKEN cDNA Z1310039H17 gene (DEF=Mus musculus ES cells cDNA, RIKEN full-length enriched library, clone:2410043M02.gtg) assembly stacking protein 2, full insert sequence.                                                                                                                                                                                                                                                                                                                | 687.3     | 287.4756  | 202.13335 | 12.589808 | 2.9203472 | 2.0 | 0.09997883  | 0.2723304  | 0.29 | 3.4  | gb BC003744.1 DB_XREF=gi:13277677 FEA=FLmRNA CNT=135 TID=Mm.3234.1 TIER=FL+Slack STK=52 UG=Mm.3234.1 LL=19060 UG_GENE=Pp2b DEF=Mus musculus, protein phosphatase 5, catalytic subunit, clone MGC:5847 IMAGE:3599302, mRNA, complete cds. /PROD=protein phosphatase 5, catalytic subunit FL-gb U25809.1 gb BC001468.1 gb BC001864.1 DB_XREF=gi:1284269 FEA=FLmRNA CNT=29 TID=Mm.23836.1 TIER=Slack STK=23 UG=Mm.23836.1 LL=70231 UG_GENE=Cn2-pending UG_TITLE=RIKEN cDNA Z1310039H17 gene (DEF=Mus musculus ES cells cDNA, RIKEN full-length enriched library, clone:2410043M02.gtg) assembly stacking protein 2, full insert sequence. | 1420.2334 | 425.87183 | 649.23334 | 171.36757 | 2.9095585 | 2.0 | 0.10061329  | 0.27202854 | 0.46 | 2.19 | gb NM_130880.1 DB_XREF=gi:18698997 GEN=Cdk9 FEA=FLmRNA CNT=119 TID=Mm.27557.1 TIER=FL+Slack STK=50 UG=Mm.27557.1 LL=107951 DEF=Mus musculus cyclin-dependent kinase 9 (CDC-related kinase) (Cdk9), mRNA. /PROD=cyclin-dependent kinase 9 FL-gb AF327431.1 gb BC003901.1 gb NM_130860.1                                                                                                                                                                                                           | 513.26666 | 108.13493 | 311.26666 | 103.22113 | 2.340426  | 3.0 | 0.1011825   | 0.271556   | 0.61 | 1.65 | gb NM_010742.1 DB_XREF=gi:7940177 GEN=Cdc37 FEA=FLmRNA CNT=193 TID=Mm.4117.1 TIER=FL+Slack STK=68 UG=Mm.4117.1 LL=12536 UG_GENE=Cdc37 DEF=Mus musculus cyclin division cycle 37 homolog (S. cerevisiae) (Cdc37), mRNA. /PROD=cyclin division cycle 37 homolog (S. cerevisiae) FL-gb U43076.1 gb NM_016742.1                                                                                                                                                                                      | 5240.6997 | 1181.1212 | 3308.3665 | 816.72766 | 2.3307126 | 3.0 | 0.10208148  | 0.2719689  | 0.63 | 1.58 | gb BC002148.1 DB_XREF=gi:12805356 FEA=FLmRNA CNT=59 TID=Mm.582.2 TIER=FL+Slack STK=49 UG=Mm.582.1 LL=11770 UG_GENE=fbp4 DEF=Mus musculus, clone MGC:7265 IMAGE:3484864, mRNA, complete cds. /PROD=Unknown (protein for MGC:7265) FL-gb BC002148.1                                                                                                                                                                                                                                                | 610.1333 | 54.303703 | 384.66666 | 124.90342 | 2.8673048 | 2.0 | 0.103153974 | 0.27283478 | 0.63 | 1.59 | gb NM_031260.1 DB_XREF=gi:13994126 FEA=Mov101 FEA=FLmRNA CNT=18 TID=Mm.102985.1 TIER=FL+Slack STK=11 UG=Mm.102985.1 LL=83456 DEF=Mus musculus Moloney leukemia virus 10-like 1 (Mov10), mRNA. /PROD=Moloney leukemia virus 10-like 1 FL-gb AF285587.1 gb AF340211.1 gb NM_031260.1                                                                                                                                                                                                               | 3885.3 | 658.83813 | 2512.8667 | 787.5243 | 2.3151417 | 3.0 | 0.10354287 | 0.27189314 | 0.65 | 1.55 | gb NM_019652.1 DB_XREF=gi:12025541 GEN=Anaf1 FEA=FLmRNA CNT=69 TID=Mm.41475.1 TIER=FL+Slack STK=26 UG=Mm.41475.1 LL=56495 DEF=Mus musculus ara (bacterial) anisole transporter, ATP-binding, homolog 1 (Anaf1), mRNA. /PROD=ara (bacterial) anisole transporter ATP-binding, homolog 1 FL-gb AF039405.2 gb NM_019652.1 gb BC016453.1 gb BC018430.1 gb NM_133777.1 DB_XREF=gi:19527003 GEN=BT2046SF12Rk FEA=FLmRNA CNT=180 TID=Mm.22491.1 TIER=FL+Slack STK=71 UG=Mm.22491.1 LL=77891 DEF=Mus mus |
| Mus musculus REF=MGC2599 DEF=Mus musculus glyceraldehyde-3-phosphate dehydrogenase mRNA, complete cds LEN=1228 C_5_..._3 represent transcript regions 5 prime, Middle, and 3 prime respectively                                                                                                                                                                                                                                                                                                                                                                                                                                                           | 38164.9    | 9613.984  | 22698.932 | 5409.2744 | 2.4283547 | 3.0 | 0.093467414 | 0.2796361  | 0.59 | 1.68 | gb NM_017393.1 DB_XREF=gi:8393155 GEN=Cp FEA=FLmRNA CNT=134 TID=Mm.15243.1 TIER=FL+Slack STK=78 UG=Mm.15243.1 LL=53895 DEF=Mus musculus caseinolytic protease, ATP-dependent, proteolytic subunit homolog (E. coli) (Cp), mRNA. /PROD=caseinolytic protease, ATP-dependent, proteolytic subunit homolog (E. coli) FL-gb NM_017393.1 gb BC001998.1 gb BC019420.1 DB_XREF=gi:18043845 FEA=FLmRNA CNT=96 TID=Mm.46654.1 TIER=FL+Slack STK=59 UG=Mm.46654.1 LL=19420 DEF=Mus musculus, Similar to chromosome 6 open reading frame 35, clone MGC:30293 IMAGE:5053733, mRNA, complete cds. /PROD=similar to chromosome 6 open reading frame 35 FL-gb BC019420.1 | 1815.1333 | 453.52466 | 927.93335 | 445.7683  | 2.416461  | 3.0 | 0.09446801  | 0.27807117 | 0.51 | 1.96 | gb NM_031888.1 DB_XREF=gi:1394194 GEN=Pp1G FEA=FLmRNA CNT=386 TID=Mm.1970.1 TIER=FL+Slack STK=206 UG=Mm.1970.1 LL=10045 DEF=Mus musculus protein phosphatase 1, catalytic subunit, alpha isoform (Pp1c), mRNA. /PROD=protein phosphatase 1, catalytic subunit, alpha isoform FL-gb U25809.1 gb BC001468.1 gb BC001864.1 DB_XREF=gi:1284269 FEA=FLmRNA CNT=29 TID=Mm.23836.1 TIER=Slack STK=23 UG=Mm.23836.1 LL=70231 UG_GENE=Cn2-pending UG_TITLE=RIKEN cDNA Z1310039H17 gene (DEF=Mus musculus ES cells cDNA, RIKEN full-length enriched library, clone:2410043M02.gtg) assembly stacking protein 2, full insert sequence.                               | 537.10004 | 157.27226 | 241.5     | 70.8365   | 2.968276  | 2.0 | 0.0972279   | 0.28165224 | 0.45 | 2.22 | gb BC002073.1 DB_XREF=gi:12805224 FEA=FLmRNA CNT=1111 TID=Mm.137.1 TIER=FL+Slack STK=50 UG=Mm.137.1 LL=20005 UG_GENE=Soya6 DEF=Mus musculus, clone MGC 8215 IMAGE:3492808, mRNA, complete cds. /PROD=Unknown (protein for MGC 8215) FL-gb NM_009139.1 gb AF128192.1 gb AF128191.1 gb MS8004.1 gb BC002073.1 gb AF128190.1 gb AF128189.1 gb AF128188.1                                                                                                                                                                                                                                                                                  | 1573.6334 | 216.04079 | 988.26666 | 366.27304 | 2.384262  | 3.0 | 0.09724311  | 0.27947822 | 0.63 | 1.59 | gb NM_009519.1 DB_XREF=gi:6678588 GEN=Wr11 FEA=FLmRNA CNT=24 TID=Mm.22182.1 TIER=FL+Slack STK=10 UG=Mm.22182.1 LL=11141 DEF=Mus musculus wingless-related MMTV integration site 11 (Wr11), mRNA. /PROD=wingless-related MMTV integration site 11 FL-gb NM_009519.1                                                                                                                                                                                                                                                                                                                                                                     | 505.4     | 71.000206 | 316.5     | 117.53268 | 2.3827572 | 3.0 | 0.09737522  | 0.27767152 | 0.63 | 1.6  | gb BC026669.1 DB_XREF=gi:1234824 FEA=FLmRNA CNT=77 TID=Mm.15807.2 TIER=FL STK=1 UG=Mm.15807.1 LL=22340 DEF=Mus musculus vascular endothelial growth factor B precursor (VEGF-B) mRNA, complete cds. /PROD=vascular endothelial growth factor B precursor FL-gb NM_043837.1 gb U48800.1                                                                                                                                                                                                                                                                                                                                                 | 3644.2334 | 921.23413 | 1713.7333 | 417.65958 | 3.3057415 | 2.0 | 0.08060011  | 0.2749443  | 0.47 | 2.13 | gb AF151792 UG_GENE=Pp2b1A DEF=Mus musculus, protein phosphatase 2 (formerly 2A), regulatory subunit A (PR 65), alpha isoform, clone MGC:7086 IMAGE:3157293, mRNA, complete cds. /PROD=protein phosphatase 2 (formerly 2A), regulatory subunit A (PR 65), alpha isoform FL-gb NM_016891.1 gb BC006606.1 gb AB021743.1                                                                                                                                                                                                                                                                                                                  | 2269.7334 | 651.43805 | 1033.5333 | 312.80685 | 2.9629393 | 2.0 | 0.097528845 | 0.2759537  | 0.46 | 2.2  | gb AF302138.1 DB_XREF=gi:15420074 FEA=FLmRNA CNT=158 TID=Mm.22029.1 TIER=FL+Slack STK=86 UG=Mm.22029.1 LL=10222 UG_GENE=Hs7 DEF=Mus musculus Hs7-interacting protein kinase mRNAs, complete cds. /PROD=Hs7-interacting protein kinase FL-gb BC18463.1 gb AF302138.1 gb BC004756.1                                                                                                                                                                                                                                                                                                                                                      | 1104.3334 | 297.56613 | 577.73334 | 241.51155 | 2.3799613 | 3.0 | 0.097621255 | 0.27409044 | 0.52 | 1.91 | gb AK008049.1 DB_XREF=gi:12840262 GEN=Mg1 FEA=mRNA CNT=5 TID=Mm.194795.3 TIER=ConsEnd STK=0 UG=Mm.194795.3 LL=23945 UG_TITLE=monoglyceride lipase DEF=Mus musculus adult male testis cDNA, RIKEN full-length enriched library, clone:1700474K monoglyceride lipase, full insert sequence.                                                                                                                                                                                                                                                                                                                                              | 1528.3666 | 498.10037 | 664.73334 | 387.59006 | 2.3701098 | 3.0 | 0.0984942   | 0.27444304 | 0.43 | 2.3  | gb BC021405.1 DB_XREF=gi:13007473 FEA=FLmRNA CNT=557 TID=Mm.1034.1 TIER=FL+Slack STK=330 UG=Mm.1034.1 LL=51792 UG_GENE=Pp2b1A DEF=Mus musculus, protein phosphatase 2 (formerly 2A), regulatory subunit A (PR 65), alpha isoform, clone MGC:7086 IMAGE:3157293, mRNA, complete cds. /PROD=protein phosphatase 2 (formerly 2A), regulatory subunit A (PR 65), alpha isoform FL-gb NM_016891.1 gb BC006606.1 gb AB021743.1                                                                                                                                                                                                               | 1429.6333 | 272.46213 | 914.4666  | 261.58444 | 2.362404  | 3.0 | 0.099183634 | 0.27425778 | 0.64 | 1.56 | gb BM196939 DB_XREF=gi:17748959 DB_XREF=0304006.3 CLONE=0304006.3 FEA=mRNA CNT=57 TID=Mm.220848.1 TIER=Slack STK=16 UG=Mm.220848 UG_TITLE=Slack DEF=Mus musculus, similar to putative, clone MGC:5345087, mRNA, partial cds. /PROD=Slack FL-gb NM_0207247.1 gb AF128192.1 gb AF128191.1 gb MS8004.1 gb BC002073.1 gb AF128190.1 gb AF128189.1 gb AF128188.1                                                                                                                                                                                                                                                                            | 366.83334 | 48.94613  | 229.76666 | 88.11454  | 2.355309  | 3.0 | 0.09982363  | 0.27395207 | 0.63 | 1.6  | gb NM_023631.1 DB_XREF=gi:12072471 FEA=FLmRNA CNT=119 TID=Mm.21897.1 TIER=FL+Slack STK=30 UG=Mm.21897.1 LL=11923 UG_GENE=Cn2-pending UG_TITLE=RIKEN cDNA Z1310039H17 gene (DEF=Mus musculus ES cells cDNA, RIKEN full-length enriched library, clone:2410043M02.gtg) assembly stacking protein 2, full insert sequence.                                                                                                                                                                                                                                                                                                                | 687.3     | 287.4756  | 202.13335 | 12.589808 | 2.9203472 | 2.0 | 0.09997883  | 0.2723304  | 0.29 | 3.4  | gb BC003744.1 DB_XREF=gi:13277677 FEA=FLmRNA CNT=135 TID=Mm.3234.1 TIER=FL+Slack STK=52 UG=Mm.3234.1 LL=19060 UG_GENE=Pp2b DEF=Mus musculus, protein phosphatase 5, catalytic subunit, clone MGC:5847 IMAGE:3599302, mRNA, complete cds. /PROD=protein phosphatase 5, catalytic subunit FL-gb U25809.1 gb BC001468.1 gb BC001864.1 DB_XREF=gi:1284269 FEA=FLmRNA CNT=29 TID=Mm.23836.1 TIER=Slack STK=23 UG=Mm.23836.1 LL=70231 UG_GENE=Cn2-pending UG_TITLE=RIKEN cDNA Z1310039H17 gene (DEF=Mus musculus ES cells cDNA, RIKEN full-length enriched library, clone:2410043M02.gtg) assembly stacking protein 2, full insert sequence. | 1420.2334 | 425.87183 | 649.23334 | 171.36757 | 2.9095585 | 2.0 | 0.10061329  | 0.27202854 | 0.46 | 2.19 | gb NM_130880.1 DB_XREF=gi:18698997 GEN=Cdk9 FEA=FLmRNA CNT=119 TID=Mm.27557.1 TIER=FL+Slack STK=50 UG=Mm.27557.1 LL=107951 DEF=Mus musculus cyclin-dependent kinase 9 (CDC-related kinase) (Cdk9), mRNA. /PROD=cyclin-dependent kinase 9 FL-gb AF327431.1 gb BC003901.1 gb NM_130860.1                                                                                                                                                                                                                                                                                                                                                 | 513.26666 | 108.13493 | 311.26666 | 103.22113 | 2.340426  | 3.0 | 0.1011825   | 0.271556   | 0.61 | 1.65 | gb NM_010742.1 DB_XREF=gi:7940177 GEN=Cdc37 FEA=FLmRNA CNT=193 TID=Mm.4117.1 TIER=FL+Slack STK=68 UG=Mm.4117.1 LL=12536 UG_GENE=Cdc37 DEF=Mus musculus cyclin division cycle 37 homolog (S. cerevisiae) (Cdc37), mRNA. /PROD=cyclin division cycle 37 homolog (S. cerevisiae) FL-gb U43076.1 gb NM_016742.1                                                                                                                                                                                      | 5240.6997 | 1181.1212 | 3308.3665 | 816.72766 | 2.3307126 | 3.0 | 0.10208148  | 0.2719689  | 0.63 | 1.58 | gb BC002148.1 DB_XREF=gi:12805356 FEA=FLmRNA CNT=59 TID=Mm.582.2 TIER=FL+Slack STK=49 UG=Mm.582.1 LL=11770 UG_GENE=fbp4 DEF=Mus musculus, clone MGC:7265 IMAGE:3484864, mRNA, complete cds. /PROD=Unknown (protein for MGC:7265) FL-gb BC002148.1                                                                                                                                                                                                                                                | 610.1333  | 54.303703 | 384.66666 | 124.90342 | 2.8673048 | 2.0 | 0.103153974 | 0.27283478 | 0.63 | 1.59 | gb NM_031260.1 DB_XREF=gi:13994126 FEA=Mov101 FEA=FLmRNA CNT=18 TID=Mm.102985.1 TIER=FL+Slack STK=11 UG=Mm.102985.1 LL=83456 DEF=Mus musculus Moloney leukemia virus 10-like 1 (Mov10), mRNA. /PROD=Moloney leukemia virus 10-like 1 FL-gb AF285587.1 gb AF340211.1 gb NM_031260.1                                                                                                                                                                                                               | 3885.3   | 658.83813 | 2512.8667 | 787.5243  | 2.3151417 | 3.0 | 0.10354287  | 0.27189314 | 0.65 | 1.55 | gb NM_019652.1 DB_XREF=gi:12025541 GEN=Anaf1 FEA=FLmRNA CNT=69 TID=Mm.41475.1 TIER=FL+Slack STK=26 UG=Mm.41475.1 LL=56495 DEF=Mus musculus ara (bacterial) anisole transporter, ATP-binding, homolog 1 (Anaf1), mRNA. /PROD=ara (bacterial) anisole transporter ATP-binding, homolog 1 FL-gb AF039405.2 gb NM_019652.1 gb BC016453.1 gb BC018430.1 gb NM_133777.1 DB_XREF=gi:19527003 GEN=BT2046SF12Rk FEA=FLmRNA CNT=180 TID=Mm.22491.1 TIER=FL+Slack STK=71 UG=Mm.22491.1 LL=77891 DEF=Mus mus |        |           |           |          |           |     |            |            |      |      |                                                                                                                                                                                                                                                                                                                                                                                                                                                                                                  |
| gb NM_017393.1 DB_XREF=gi:8393155 GEN=Cp FEA=FLmRNA CNT=134 TID=Mm.15243.1 TIER=FL+Slack STK=78 UG=Mm.15243.1 LL=53895 DEF=Mus musculus caseinolytic protease, ATP-dependent, proteolytic subunit homolog (E. coli) (Cp), mRNA. /PROD=caseinolytic protease, ATP-dependent, proteolytic subunit homolog (E. coli) FL-gb NM_017393.1 gb BC001998.1 gb BC019420.1 DB_XREF=gi:18043845 FEA=FLmRNA CNT=96 TID=Mm.46654.1 TIER=FL+Slack STK=59 UG=Mm.46654.1 LL=19420 DEF=Mus musculus, Similar to chromosome 6 open reading frame 35, clone MGC:30293 IMAGE:5053733, mRNA, complete cds. /PROD=similar to chromosome 6 open reading frame 35 FL-gb BC019420.1 | 1815.1333  | 453.52466 | 927.93335 | 445.7683  | 2.416461  | 3.0 | 0.09446801  | 0.27807117 | 0.51 | 1.96 | gb NM_031888.1 DB_XREF=gi:1394194 GEN=Pp1G FEA=FLmRNA CNT=386 TID=Mm.1970.1 TIER=FL+Slack STK=206 UG=Mm.1970.1 LL=10045 DEF=Mus musculus protein phosphatase 1, catalytic subunit, alpha isoform (Pp1c), mRNA. /PROD=protein phosphatase 1, catalytic subunit, alpha isoform FL-gb U25809.1 gb BC001468.1 gb BC001864.1 DB_XREF=gi:1284269 FEA=FLmRNA CNT=29 TID=Mm.23836.1 TIER=Slack STK=23 UG=Mm.23836.1 LL=70231 UG_GENE=Cn2-pending UG_TITLE=RIKEN cDNA Z1310039H17 gene (DEF=Mus musculus ES cells cDNA, RIKEN full-length enriched library, clone:2410043M02.gtg) assembly stacking protein 2, full insert sequence.                               | 537.10004 | 157.27226 | 241.5     | 70.8365   | 2.968276  | 2.0 | 0.0972279   | 0.28165224 | 0.45 | 2.22 | gb BC002073.1 DB_XREF=gi:12805224 FEA=FLmRNA CNT=1111 TID=Mm.137.1 TIER=FL+Slack STK=50 UG=Mm.137.1 LL=20005 UG_GENE=Soya6 DEF=Mus musculus, clone MGC 8215 IMAGE:3492808, mRNA, complete cds. /PROD=Unknown (protein for MGC 8215) FL-gb NM_009139.1 gb AF128192.1 gb AF128191.1 gb MS8004.1 gb BC002073.1 gb AF128190.1 gb AF128189.1 gb AF128188.1                                                                                                                                                                                                                                                                                                     | 1573.6334 | 216.04079 | 988.26666 | 366.27304 | 2.384262  | 3.0 | 0.09724311  | 0.27947822 | 0.63 | 1.59 | gb NM_009519.1 DB_XREF=gi:6678588 GEN=Wr11 FEA=FLmRNA CNT=24 TID=Mm.22182.1 TIER=FL+Slack STK=10 UG=Mm.22182.1 LL=11141 DEF=Mus musculus wingless-related MMTV integration site 11 (Wr11), mRNA. /PROD=wingless-related MMTV integration site 11 FL-gb NM_009519.1                                                                                                                                                                                                                                                                                                                                                                     | 505.4     | 71.000206 | 316.5     | 117.53268 | 2.3827572 | 3.0 | 0.09737522  | 0.27767152 | 0.63 | 1.6  | gb BC026669.1 DB_XREF=gi:1234824 FEA=FLmRNA CNT=77 TID=Mm.15807.2 TIER=FL STK=1 UG=Mm.15807.1 LL=22340 DEF=Mus musculus vascular endothelial growth factor B precursor (VEGF-B) mRNA, complete cds. /PROD=vascular endothelial growth factor B precursor FL-gb NM_043837.1 gb U48800.1                                                                                                                                                                                                                                                                                                                                                 | 3644.2334 | 921.23413 | 1713.7333 | 417.65958 | 3.3057415 | 2.0 | 0.08060011  | 0.2749443  | 0.47 | 2.13 | gb AF151792 UG_GENE=Pp2b1A DEF=Mus musculus, protein phosphatase 2 (formerly 2A), regulatory subunit A (PR 65), alpha isoform, clone MGC:7086 IMAGE:3157293, mRNA, complete cds. /PROD=protein phosphatase 2 (formerly 2A), regulatory subunit A (PR 65), alpha isoform FL-gb NM_016891.1 gb BC006606.1 gb AB021743.1                                                                                                                                                                                                                                                                                                                  | 2269.7334 | 651.43805 | 1033.5333 | 312.80685 | 2.9629393 | 2.0 | 0.097528845 | 0.2759537  | 0.46 | 2.2  | gb AF302138.1 DB_XREF=gi:15420074 FEA=FLmRNA CNT=158 TID=Mm.22029.1 TIER=FL+Slack STK=86 UG=Mm.22029.1 LL=10222 UG_GENE=Hs7 DEF=Mus musculus Hs7-interacting protein kinase mRNAs, complete cds. /PROD=Hs7-interacting protein kinase FL-gb BC18463.1 gb AF302138.1 gb BC004756.1                                                                                                                                                                                                                                                                                                                                                      | 1104.3334 | 297.56613 | 577.73334 | 241.51155 | 2.3799613 | 3.0 | 0.097621255 | 0.27409044 | 0.52 | 1.91 | gb AK008049.1 DB_XREF=gi:12840262 GEN=Mg1 FEA=mRNA CNT=5 TID=Mm.194795.3 TIER=ConsEnd STK=0 UG=Mm.194795.3 LL=23945 UG_TITLE=monoglyceride lipase DEF=Mus musculus adult male testis cDNA, RIKEN full-length enriched library, clone:1700474K monoglyceride lipase, full insert sequence.                                                                                                                                                                                                                                                                                                                                              | 1528.3666 | 498.10037 | 664.73334 | 387.59006 | 2.3701098 | 3.0 | 0.0984942   | 0.27444304 | 0.43 | 2.3  | gb BC021405.1 DB_XREF=gi:13007473 FEA=FLmRNA CNT=557 TID=Mm.1034.1 TIER=FL+Slack STK=330 UG=Mm.1034.1 LL=51792 UG_GENE=Pp2b1A DEF=Mus musculus, protein phosphatase 2 (formerly 2A), regulatory subunit A (PR 65), alpha isoform, clone MGC:7086 IMAGE:3157293, mRNA, complete cds. /PROD=protein phosphatase 2 (formerly 2A), regulatory subunit A (PR 65), alpha isoform FL-gb NM_016891.1 gb BC006606.1 gb AB021743.1                                                                                                                                                                                                               | 1429.6333 | 272.46213 | 914.4666  | 261.58444 | 2.362404  | 3.0 | 0.099183634 | 0.27425778 | 0.64 | 1.56 | gb BM196939 DB_XREF=gi:17748959 DB_XREF=0304006.3 CLONE=0304006.3 FEA=mRNA CNT=57 TID=Mm.220848.1 TIER=Slack STK=16 UG=Mm.220848 UG_TITLE=Slack DEF=Mus musculus, similar to putative, clone MGC:5345087, mRNA, partial cds. /PROD=Slack FL-gb NM_0207247.1 gb AF128192.1 gb AF128191.1 gb MS8004.1 gb BC002073.1 gb AF128190.1 gb AF128189.1 gb AF128188.1                                                                                                                                                                                                                                                                            | 366.83334 | 48.94613  | 229.76666 | 88.11454  | 2.355309  | 3.0 | 0.09982363  | 0.27395207 | 0.63 | 1.6  | gb NM_023631.1 DB_XREF=gi:12072471 FEA=FLmRNA CNT=119 TID=Mm.21897.1 TIER=FL+Slack STK=30 UG=Mm.21897.1 LL=11923 UG_GENE=Cn2-pending UG_TITLE=RIKEN cDNA Z1310039H17 gene (DEF=Mus musculus ES cells cDNA, RIKEN full-length enriched library, clone:2410043M02.gtg) assembly stacking protein 2, full insert sequence.                                                                                                                                                                                                                                                                                                                | 687.3     | 287.4756  | 202.13335 | 12.589808 | 2.9203472 | 2.0 | 0.09997883  | 0.2723304  | 0.29 | 3.4  | gb BC003744.1 DB_XREF=gi:13277677 FEA=FLmRNA CNT=135 TID=Mm.3234.1 TIER=FL+Slack STK=52 UG=Mm.3234.1 LL=19060 UG_GENE=Pp2b DEF=Mus musculus, protein phosphatase 5, catalytic subunit, clone MGC:5847 IMAGE:3599302, mRNA, complete cds. /PROD=protein phosphatase 5, catalytic subunit FL-gb U25809.1 gb BC001468.1 gb BC001864.1 DB_XREF=gi:1284269 FEA=FLmRNA CNT=29 TID=Mm.23836.1 TIER=Slack STK=23 UG=Mm.23836.1 LL=70231 UG_GENE=Cn2-pending UG_TITLE=RIKEN cDNA Z1310039H17 gene (DEF=Mus musculus ES cells cDNA, RIKEN full-length enriched library, clone:2410043M02.gtg) assembly stacking protein 2, full insert sequence. | 1420.2334 | 425.87183 | 649.23334 | 171.36757 | 2.9095585 | 2.0 | 0.10061329  | 0.27202854 | 0.46 | 2.19 | gb NM_130880.1 DB_XREF=gi:18698997 GEN=Cdk9 FEA=FLmRNA CNT=119 TID=Mm.27557.1 TIER=FL+Slack STK=50 UG=Mm.27557.1 LL=107951 DEF=Mus musculus cyclin-dependent kinase 9 (CDC-related kinase) (Cdk9), mRNA. /PROD=cyclin-dependent kinase 9 FL-gb AF327431.1 gb BC003901.1 gb NM_130860.1                                                                                                                                                                                                                                                                                                                                                 | 513.26666 | 108.13493 | 311.26666 | 103.22113 | 2.340426  | 3.0 | 0.1011825   | 0.271556   | 0.61 | 1.65 | gb NM_010742.1 DB_XREF=gi:7940177 GEN=Cdc37 FEA=FLmRNA CNT=193 TID=Mm.4117.1 TIER=FL+Slack STK=68 UG=Mm.4117.1 LL=12536 UG_GENE=Cdc37 DEF=Mus musculus cyclin division cycle 37 homolog (S. cerevisiae) (Cdc37), mRNA. /PROD=cyclin division cycle 37 homolog (S. cerevisiae) FL-gb U43076.1 gb NM_016742.1                                                                                                                                                                                                                                                                                                                            | 5240.6997 | 1181.1212 | 3308.3665 | 816.72766 | 2.3307126 | 3.0 | 0.10208148  | 0.2719689  | 0.63 | 1.58 | gb BC002148.1 DB_XREF=gi:12805356 FEA=FLmRNA CNT=59 TID=Mm.582.2 TIER=FL+Slack STK=49 UG=Mm.582.1 LL=11770 UG_GENE=fbp4 DEF=Mus musculus, clone MGC:7265 IMAGE:3484864, mRNA, complete cds. /PROD=Unknown (protein for MGC:7265) FL-gb BC002148.1                                                                                                                                                                                                                                                | 610.1333  | 54.303703 | 384.66666 | 124.90342 | 2.8673048 | 2.0 | 0.103153974 | 0.27283478 | 0.63 | 1.59 | gb NM_031260.1 DB_XREF=gi:13994126 FEA=Mov101 FEA=FLmRNA CNT=18 TID=Mm.102985.1 TIER=FL+Slack STK=11 UG=Mm.102985.1 LL=83456 DEF=Mus musculus Moloney leukemia virus 10-like 1 (Mov10), mRNA. /PROD=Moloney leukemia virus 10-like 1 FL-gb AF285587.1 gb AF340211.1 gb NM_031260.1                                                                                                                                                                                                               | 3885.3    | 658.83813 | 2512.8667 | 787.5243  | 2.3151417 | 3.0 | 0.10354287  | 0.27189314 | 0.65 | 1.55 | gb NM_019652.1 DB_XREF=gi:12025541 GEN=Anaf1 FEA=FLmRNA CNT=69 TID=Mm.41475.1 TIER=FL+Slack STK=26 UG=Mm.41475.1 LL=56495 DEF=Mus musculus ara (bacterial) anisole transporter, ATP-binding, homolog 1 (Anaf1), mRNA. /PROD=ara (bacterial) anisole transporter ATP-binding, homolog 1 FL-gb AF039405.2 gb NM_019652.1 gb BC016453.1 gb BC018430.1 gb NM_133777.1 DB_XREF=gi:19527003 GEN=BT2046SF12Rk FEA=FLmRNA CNT=180 TID=Mm.22491.1 TIER=FL+Slack STK=71 UG=Mm.22491.1 LL=77891 DEF=Mus mus |          |           |           |           |           |     |             |            |      |      |                                                                                                                                                                                                                                                                                                                                                                                                                                                                                                  |        |           |           |          |           |     |            |            |      |      |                                                                                                                                                                                                                                                                                                                                                                                                                                                                                                  |
| gb NM_031888.1 DB_XREF=gi:1394194 GEN=Pp1G FEA=FLmRNA CNT=386 TID=Mm.1970.1 TIER=FL+Slack STK=206 UG=Mm.1970.1 LL=10045 DEF=Mus musculus protein phosphatase 1, catalytic subunit, alpha isoform (Pp1c), mRNA. /PROD=protein phosphatase 1, catalytic subunit, alpha isoform FL-gb U25809.1 gb BC001468.1 gb BC001864.1 DB_XREF=gi:1284269 FEA=FLmRNA CNT=29 TID=Mm.23836.1 TIER=Slack STK=23 UG=Mm.23836.1 LL=70231 UG_GENE=Cn2-pending UG_TITLE=RIKEN cDNA Z1310039H17 gene (DEF=Mus musculus ES cells cDNA, RIKEN full-length enriched library, clone:2410043M02.gtg) assembly stacking protein 2, full insert sequence.                               | 537.10004  | 157.27226 | 241.5     | 70.8365   | 2.968276  | 2.0 | 0.0972279   | 0.28165224 | 0.45 | 2.22 | gb BC002073.1 DB_XREF=gi:12805224 FEA=FLmRNA CNT=1111 TID=Mm.137.1 TIER=FL+Slack STK=50 UG=Mm.137.1 LL=20005 UG_GENE=Soya6 DEF=Mus musculus, clone MGC 8215 IMAGE:3492808, mRNA, complete cds. /PROD=Unknown (protein for MGC 8215) FL-gb NM_009139.1 gb AF128192.1 gb AF128191.1 gb MS8004.1 gb BC002073.1 gb AF128190.1 gb AF128189.1 gb AF128188.1                                                                                                                                                                                                                                                                                                     | 1573.6334 | 216.04079 | 988.26666 | 366.27304 | 2.384262  | 3.0 | 0.09724311  | 0.27947822 | 0.63 | 1.59 | gb NM_009519.1 DB_XREF=gi:6678588 GEN=Wr11 FEA=FLmRNA CNT=24 TID=Mm.22182.1 TIER=FL+Slack STK=10 UG=Mm.22182.1 LL=11141 DEF=Mus musculus wingless-related MMTV integration site 11 (Wr11), mRNA. /PROD=wingless-related MMTV integration site 11 FL-gb NM_009519.1                                                                                                                                                                                                                                                                                                                                                                                        | 505.4     | 71.000206 | 316.5     | 117.53268 | 2.3827572 | 3.0 | 0.09737522  | 0.27767152 | 0.63 | 1.6  | gb BC026669.1 DB_XREF=gi:1234824 FEA=FLmRNA CNT=77 TID=Mm.15807.2 TIER=FL STK=1 UG=Mm.15807.1 LL=22340 DEF=Mus musculus vascular endothelial growth factor B precursor (VEGF-B) mRNA, complete cds. /PROD=vascular endothelial growth factor B precursor FL-gb NM_043837.1 gb U48800.1                                                                                                                                                                                                                                                                                                                                                 | 3644.2334 | 921.23413 | 1713.7333 | 417.65958 | 3.3057415 | 2.0 | 0.08060011  | 0.2749443  | 0.47 | 2.13 | gb AF151792 UG_GENE=Pp2b1A DEF=Mus musculus, protein phosphatase 2 (formerly 2A), regulatory subunit A (PR 65), alpha isoform, clone MGC:7086 IMAGE:3157293, mRNA, complete cds. /PROD=protein phosphatase 2 (formerly 2A), regulatory subunit A (PR 65), alpha isoform FL-gb NM_016891.1 gb BC006606.1 gb AB021743.1                                                                                                                                                                                                                                                                                                                  | 2269.7334 | 651.43805 | 1033.5333 | 312.80685 | 2.9629393 | 2.0 | 0.097528845 | 0.2759537  | 0.46 | 2.2  | gb AF302138.1 DB_XREF=gi:15420074 FEA=FLmRNA CNT=158 TID=Mm.22029.1 TIER=FL+Slack STK=86 UG=Mm.22029.1 LL=10222 UG_GENE=Hs7 DEF=Mus musculus Hs7-interacting protein kinase mRNAs, complete cds. /PROD=Hs7-interacting protein kinase FL-gb BC18463.1 gb AF302138.1 gb BC004756.1                                                                                                                                                                                                                                                                                                                                                      | 1104.3334 | 297.56613 | 577.73334 | 241.51155 | 2.3799613 | 3.0 | 0.097621255 | 0.27409044 | 0.52 | 1.91 | gb AK008049.1 DB_XREF=gi:12840262 GEN=Mg1 FEA=mRNA CNT=5 TID=Mm.194795.3 TIER=ConsEnd STK=0 UG=Mm.194795.3 LL=23945 UG_TITLE=monoglyceride lipase DEF=Mus musculus adult male testis cDNA, RIKEN full-length enriched library, clone:1700474K monoglyceride lipase, full insert sequence.                                                                                                                                                                                                                                                                                                                                              | 1528.3666 | 498.10037 | 664.73334 | 387.59006 | 2.3701098 | 3.0 | 0.0984942   | 0.27444304 | 0.43 | 2.3  | gb BC021405.1 DB_XREF=gi:13007473 FEA=FLmRNA CNT=557 TID=Mm.1034.1 TIER=FL+Slack STK=330 UG=Mm.1034.1 LL=51792 UG_GENE=Pp2b1A DEF=Mus musculus, protein phosphatase 2 (formerly 2A), regulatory subunit A (PR 65), alpha isoform, clone MGC:7086 IMAGE:3157293, mRNA, complete cds. /PROD=protein phosphatase 2 (formerly 2A), regulatory subunit A (PR 65), alpha isoform FL-gb NM_016891.1 gb BC006606.1 gb AB021743.1                                                                                                                                                                                                               | 1429.6333 | 272.46213 | 914.4666  | 261.58444 | 2.362404  | 3.0 | 0.099183634 | 0.27425778 | 0.64 | 1.56 | gb BM196939 DB_XREF=gi:17748959 DB_XREF=0304006.3 CLONE=0304006.3 FEA=mRNA CNT=57 TID=Mm.220848.1 TIER=Slack STK=16 UG=Mm.220848 UG_TITLE=Slack DEF=Mus musculus, similar to putative, clone MGC:5345087, mRNA, partial cds. /PROD=Slack FL-gb NM_0207247.1 gb AF128192.1 gb AF128191.1 gb MS8004.1 gb BC002073.1 gb AF128190.1 gb AF128189.1 gb AF128188.1                                                                                                                                                                                                                                                                            | 366.83334 | 48.94613  | 229.76666 | 88.11454  | 2.355309  | 3.0 | 0.09982363  | 0.27395207 | 0.63 | 1.6  | gb NM_023631.1 DB_XREF=gi:12072471 FEA=FLmRNA CNT=119 TID=Mm.21897.1 TIER=FL+Slack STK=30 UG=Mm.21897.1 LL=11923 UG_GENE=Cn2-pending UG_TITLE=RIKEN cDNA Z1310039H17 gene (DEF=Mus musculus ES cells cDNA, RIKEN full-length enriched library, clone:2410043M02.gtg) assembly stacking protein 2, full insert sequence.                                                                                                                                                                                                                                                                                                                | 687.3     | 287.4756  | 202.13335 | 12.589808 | 2.9203472 | 2.0 | 0.09997883  | 0.2723304  | 0.29 | 3.4  | gb BC003744.1 DB_XREF=gi:13277677 FEA=FLmRNA CNT=135 TID=Mm.3234.1 TIER=FL+Slack STK=52 UG=Mm.3234.1 LL=19060 UG_GENE=Pp2b DEF=Mus musculus, protein phosphatase 5, catalytic subunit, clone MGC:5847 IMAGE:3599302, mRNA, complete cds. /PROD=protein phosphatase 5, catalytic subunit FL-gb U25809.1 gb BC001468.1 gb BC001864.1 DB_XREF=gi:1284269 FEA=FLmRNA CNT=29 TID=Mm.23836.1 TIER=Slack STK=23 UG=Mm.23836.1 LL=70231 UG_GENE=Cn2-pending UG_TITLE=RIKEN cDNA Z1310039H17 gene (DEF=Mus musculus ES cells cDNA, RIKEN full-length enriched library, clone:2410043M02.gtg) assembly stacking protein 2, full insert sequence. | 1420.2334 | 425.87183 | 649.23334 | 171.36757 | 2.9095585 | 2.0 | 0.10061329  | 0.27202854 | 0.46 | 2.19 | gb NM_130880.1 DB_XREF=gi:18698997 GEN=Cdk9 FEA=FLmRNA CNT=119 TID=Mm.27557.1 TIER=FL+Slack STK=50 UG=Mm.27557.1 LL=107951 DEF=Mus musculus cyclin-dependent kinase 9 (CDC-related kinase) (Cdk9), mRNA. /PROD=cyclin-dependent kinase 9 FL-gb AF327431.1 gb BC003901.1 gb NM_130860.1                                                                                                                                                                                                                                                                                                                                                 | 513.26666 | 108.13493 | 311.26666 | 103.22113 | 2.340426  | 3.0 | 0.1011825   | 0.271556   | 0.61 | 1.65 | gb NM_010742.1 DB_XREF=gi:7940177 GEN=Cdc37 FEA=FLmRNA CNT=193 TID=Mm.4117.1 TIER=FL+Slack STK=68 UG=Mm.4117.1 LL=12536 UG_GENE=Cdc37 DEF=Mus musculus cyclin division cycle 37 homolog (S. cerevisiae) (Cdc37), mRNA. /PROD=cyclin division cycle 37 homolog (S. cerevisiae) FL-gb U43076.1 gb NM_016742.1                                                                                                                                                                                                                                                                                                                            | 5240.6997 | 1181.1212 | 3308.3665 | 816.72766 | 2.3307126 | 3.0 | 0.10208148  | 0.2719689  | 0.63 | 1.58 | gb BC002148.1 DB_XREF=gi:12805356 FEA=FLmRNA CNT=59 TID=Mm.582.2 TIER=FL+Slack STK=49 UG=Mm.582.1 LL=11770 UG_GENE=fbp4 DEF=Mus musculus, clone MGC:7265 IMAGE:3484864, mRNA, complete cds. /PROD=Unknown (protein for MGC:7265) FL-gb BC002148.1                                                                                                                                                                                                                                                                                                                                                                                      | 610.1333  | 54.303703 | 384.66666 | 124.90342 | 2.8673048 | 2.0 | 0.103153974 | 0.27283478 | 0.63 | 1.59 | gb NM_031260.1 DB_XREF=gi:13994126 FEA=Mov101 FEA=FLmRNA CNT=18 TID=Mm.102985.1 TIER=FL+Slack STK=11 UG=Mm.102985.1 LL=83456 DEF=Mus musculus Moloney leukemia virus 10-like 1 (Mov10), mRNA. /PROD=Moloney leukemia virus 10-like 1 FL-gb AF285587.1 gb AF340211.1 gb NM_031260.1                                                                                                                                                                                                               | 3885.3    | 658.83813 | 2512.8667 | 787.5243  | 2.3151417 | 3.0 | 0.10354287  | 0.27189314 | 0.65 | 1.55 | gb NM_019652.1 DB_XREF=gi:12025541 GEN=Anaf1 FEA=FLmRNA CNT=69 TID=Mm.41475.1 TIER=FL+Slack STK=26 UG=Mm.41475.1 LL=56495 DEF=Mus musculus ara (bacterial) anisole transporter, ATP-binding, homolog 1 (Anaf1), mRNA. /PROD=ara (bacterial) anisole transporter ATP-binding, homolog 1 FL-gb AF039405.2 gb NM_019652.1 gb BC016453.1 gb BC018430.1 gb NM_133777.1 DB_XREF=gi:19527003 GEN=BT2046SF12Rk FEA=FLmRNA CNT=180 TID=Mm.22491.1 TIER=FL+Slack STK=71 UG=Mm.22491.1 LL=77891 DEF=Mus mus |           |           |           |           |           |     |             |            |      |      |                                                                                                                                                                                                                                                                                                                                                                                                                                                                                                  |          |           |           |           |           |     |             |            |      |      |                                                                                                                                                                                                                                                                                                                                                                                                                                                                                                  |        |           |           |          |           |     |            |            |      |      |                                                                                                                                                                                                                                                                                                                                                                                                                                                                                                  |
| gb BC002073.1 DB_XREF=gi:12805224 FEA=FLmRNA CNT=1111 TID=Mm.137.1 TIER=FL+Slack STK=50 UG=Mm.137.1 LL=20005 UG_GENE=Soya6 DEF=Mus musculus, clone MGC 8215 IMAGE:3492808, mRNA, complete cds. /PROD=Unknown (protein for MGC 8215) FL-gb NM_009139.1 gb AF128192.1 gb AF128191.1 gb MS8004.1 gb BC002073.1 gb AF128190.1 gb AF128189.1 gb AF128188.1                                                                                                                                                                                                                                                                                                     | 1573.6334  | 216.04079 | 988.26666 | 366.27304 | 2.384262  | 3.0 | 0.09724311  | 0.27947822 | 0.63 | 1.59 | gb NM_009519.1 DB_XREF=gi:6678588 GEN=Wr11 FEA=FLmRNA CNT=24 TID=Mm.22182.1 TIER=FL+Slack STK=10 UG=Mm.22182.1 LL=11141 DEF=Mus musculus wingless-related MMTV integration site 11 (Wr11), mRNA. /PROD=wingless-related MMTV integration site 11 FL-gb NM_009519.1                                                                                                                                                                                                                                                                                                                                                                                        | 505.4     | 71.000206 | 316.5     | 117.53268 | 2.3827572 | 3.0 | 0.09737522  | 0.27767152 | 0.63 | 1.6  | gb BC026669.1 DB_XREF=gi:1234824 FEA=FLmRNA CNT=77 TID=Mm.15807.2 TIER=FL STK=1 UG=Mm.15807.1 LL=22340 DEF=Mus musculus vascular endothelial growth factor B precursor (VEGF-B) mRNA, complete cds. /PROD=vascular endothelial growth factor B precursor FL-gb NM_043837.1 gb U48800.1                                                                                                                                                                                                                                                                                                                                                                    | 3644.2334 | 921.23413 | 1713.7333 | 417.65958 | 3.3057415 | 2.0 | 0.08060011  | 0.2749443  | 0.47 | 2.13 | gb AF151792 UG_GENE=Pp2b1A DEF=Mus musculus, protein phosphatase 2 (formerly 2A), regulatory subunit A (PR 65), alpha isoform, clone MGC:7086 IMAGE:3157293, mRNA, complete cds. /PROD=protein phosphatase 2 (formerly 2A), regulatory subunit A (PR 65), alpha isoform FL-gb NM_016891.1 gb BC006606.1 gb AB021743.1                                                                                                                                                                                                                                                                                                                  | 2269.7334 | 651.43805 | 1033.5333 | 312.80685 | 2.9629393 | 2.0 | 0.097528845 | 0.2759537  | 0.46 | 2.2  | gb AF302138.1 DB_XREF=gi:15420074 FEA=FLmRNA CNT=158 TID=Mm.22029.1 TIER=FL+Slack STK=86 UG=Mm.22029.1 LL=10222 UG_GENE=Hs7 DEF=Mus musculus Hs7-interacting protein kinase mRNAs, complete cds. /PROD=Hs7-interacting protein kinase FL-gb BC18463.1 gb AF302138.1 gb BC004756.1                                                                                                                                                                                                                                                                                                                                                      | 1104.3334 | 297.56613 | 577.73334 | 241.51155 | 2.3799613 | 3.0 | 0.097621255 | 0.27409044 | 0.52 | 1.91 | gb AK008049.1 DB_XREF=gi:12840262 GEN=Mg1 FEA=mRNA CNT=5 TID=Mm.194795.3 TIER=ConsEnd STK=0 UG=Mm.194795.3 LL=23945 UG_TITLE=monoglyceride lipase DEF=Mus musculus adult male testis cDNA, RIKEN full-length enriched library, clone:1700474K monoglyceride lipase, full insert sequence.                                                                                                                                                                                                                                                                                                                                              | 1528.3666 | 498.10037 | 664.73334 | 387.59006 | 2.3701098 | 3.0 | 0.0984942   | 0.27444304 | 0.43 | 2.3  | gb BC021405.1 DB_XREF=gi:13007473 FEA=FLmRNA CNT=557 TID=Mm.1034.1 TIER=FL+Slack STK=330 UG=Mm.1034.1 LL=51792 UG_GENE=Pp2b1A DEF=Mus musculus, protein phosphatase 2 (formerly 2A), regulatory subunit A (PR 65), alpha isoform, clone MGC:7086 IMAGE:3157293, mRNA, complete cds. /PROD=protein phosphatase 2 (formerly 2A), regulatory subunit A (PR 65), alpha isoform FL-gb NM_016891.1 gb BC006606.1 gb AB021743.1                                                                                                                                                                                                               | 1429.6333 | 272.46213 | 914.4666  | 261.58444 | 2.362404  | 3.0 | 0.099183634 | 0.27425778 | 0.64 | 1.56 | gb BM196939 DB_XREF=gi:17748959 DB_XREF=0304006.3 CLONE=0304006.3 FEA=mRNA CNT=57 TID=Mm.220848.1 TIER=Slack STK=16 UG=Mm.220848 UG_TITLE=Slack DEF=Mus musculus, similar to putative, clone MGC:5345087, mRNA, partial cds. /PROD=Slack FL-gb NM_0207247.1 gb AF128192.1 gb AF128191.1 gb MS8004.1 gb BC002073.1 gb AF128190.1 gb AF128189.1 gb AF128188.1                                                                                                                                                                                                                                                                            | 366.83334 | 48.94613  | 229.76666 | 88.11454  | 2.355309  | 3.0 | 0.09982363  | 0.27395207 | 0.63 | 1.6  | gb NM_023631.1 DB_XREF=gi:12072471 FEA=FLmRNA CNT=119 TID=Mm.21897.1 TIER=FL+Slack STK=30 UG=Mm.21897.1 LL=11923 UG_GENE=Cn2-pending UG_TITLE=RIKEN cDNA Z1310039H17 gene (DEF=Mus musculus ES cells cDNA, RIKEN full-length enriched library, clone:2410043M02.gtg) assembly stacking protein 2, full insert sequence.                                                                                                                                                                                                                                                                                                                | 687.3     | 287.4756  | 202.13335 | 12.589808 | 2.9203472 | 2.0 | 0.09997883  | 0.2723304  | 0.29 | 3.4  | gb BC003744.1 DB_XREF=gi:13277677 FEA=FLmRNA CNT=135 TID=Mm.3234.1 TIER=FL+Slack STK=52 UG=Mm.3234.1 LL=19060 UG_GENE=Pp2b DEF=Mus musculus, protein phosphatase 5, catalytic subunit, clone MGC:5847 IMAGE:3599302, mRNA, complete cds. /PROD=protein phosphatase 5, catalytic subunit FL-gb U25809.1 gb BC001468.1 gb BC001864.1 DB_XREF=gi:1284269 FEA=FLmRNA CNT=29 TID=Mm.23836.1 TIER=Slack STK=23 UG=Mm.23836.1 LL=70231 UG_GENE=Cn2-pending UG_TITLE=RIKEN cDNA Z1310039H17 gene (DEF=Mus musculus ES cells cDNA, RIKEN full-length enriched library, clone:2410043M02.gtg) assembly stacking protein 2, full insert sequence. | 1420.2334 | 425.87183 | 649.23334 | 171.36757 | 2.9095585 | 2.0 | 0.10061329  | 0.27202854 | 0.46 | 2.19 | gb NM_130880.1 DB_XREF=gi:18698997 GEN=Cdk9 FEA=FLmRNA CNT=119 TID=Mm.27557.1 TIER=FL+Slack STK=50 UG=Mm.27557.1 LL=107951 DEF=Mus musculus cyclin-dependent kinase 9 (CDC-related kinase) (Cdk9), mRNA. /PROD=cyclin-dependent kinase 9 FL-gb AF327431.1 gb BC003901.1 gb NM_130860.1                                                                                                                                                                                                                                                                                                                                                 | 513.26666 | 108.13493 | 311.26666 | 103.22113 | 2.340426  | 3.0 | 0.1011825   | 0.271556   | 0.61 | 1.65 | gb NM_010742.1 DB_XREF=gi:7940177 GEN=Cdc37 FEA=FLmRNA CNT=193 TID=Mm.4117.1 TIER=FL+Slack STK=68 UG=Mm.4117.1 LL=12536 UG_GENE=Cdc37 DEF=Mus musculus cyclin division cycle 37 homolog (S. cerevisiae) (Cdc37), mRNA. /PROD=cyclin division cycle 37 homolog (S. cerevisiae) FL-gb U43076.1 gb NM_016742.1                                                                                                                                                                                                                                                                                                                            | 5240.6997 | 1181.1212 | 3308.3665 | 816.72766 | 2.3307126 | 3.0 | 0.10208148  | 0.2719689  | 0.63 | 1.58 | gb BC002148.1 DB_XREF=gi:12805356 FEA=FLmRNA CNT=59 TID=Mm.582.2 TIER=FL+Slack STK=49 UG=Mm.582.1 LL=11770 UG_GENE=fbp4 DEF=Mus musculus, clone MGC:7265 IMAGE:3484864, mRNA, complete cds. /PROD=Unknown (protein for MGC:7265) FL-gb BC002148.1                                                                                                                                                                                                                                                                                                                                                                                      | 610.1333  | 54.303703 | 384.66666 | 124.90342 | 2.8673048 | 2.0 | 0.103153974 | 0.27283478 | 0.63 | 1.59 | gb NM_031260.1 DB_XREF=gi:13994126 FEA=Mov101 FEA=FLmRNA CNT=18 TID=Mm.102985.1 TIER=FL+Slack STK=11 UG=Mm.102985.1 LL=83456 DEF=Mus musculus Moloney leukemia virus 10-like 1 (Mov10), mRNA. /PROD=Moloney leukemia virus 10-like 1 FL-gb AF285587.1 gb AF340211.1 gb NM_031260.1                                                                                                                                                                                                                                                                                                                                                     | 3885.3    | 658.83813 | 2512.8667 | 787.5243  | 2.3151417 | 3.0 | 0.10354287  | 0.27189314 | 0.65 | 1.55 | gb NM_019652.1 DB_XREF=gi:12025541 GEN=Anaf1 FEA=FLmRNA CNT=69 TID=Mm.41475.1 TIER=FL+Slack STK=26 UG=Mm.41475.1 LL=56495 DEF=Mus musculus ara (bacterial) anisole transporter, ATP-binding, homolog 1 (Anaf1), mRNA. /PROD=ara (bacterial) anisole transporter ATP-binding, homolog 1 FL-gb AF039405.2 gb NM_019652.1 gb BC016453.1 gb BC018430.1 gb NM_133777.1 DB_XREF=gi:19527003 GEN=BT2046SF12Rk FEA=FLmRNA CNT=180 TID=Mm.22491.1 TIER=FL+Slack STK=71 UG=Mm.22491.1 LL=77891 DEF=Mus mus |           |           |           |           |           |     |             |            |      |      |                                                                                                                                                                                                                                                                                                                                                                                                                                                                                                  |           |           |           |           |           |     |             |            |      |      |                                                                                                                                                                                                                                                                                                                                                                                                                                                                                                  |          |           |           |           |           |     |             |            |      |      |                                                                                                                                                                                                                                                                                                                                                                                                                                                                                                  |        |           |           |          |           |     |            |            |      |      |                                                                                                                                                                                                                                                                                                                                                                                                                                                                                                  |
| gb NM_009519.1 DB_XREF=gi:6678588 GEN=Wr11 FEA=FLmRNA CNT=24 TID=Mm.22182.1 TIER=FL+Slack STK=10 UG=Mm.22182.1 LL=11141 DEF=Mus musculus wingless-related MMTV integration site 11 (Wr11), mRNA. /PROD=wingless-related MMTV integration site 11 FL-gb NM_009519.1                                                                                                                                                                                                                                                                                                                                                                                        | 505.4      | 71.000206 | 316.5     | 117.53268 | 2.3827572 | 3.0 | 0.09737522  | 0.27767152 | 0.63 | 1.6  | gb BC026669.1 DB_XREF=gi:1234824 FEA=FLmRNA CNT=77 TID=Mm.15807.2 TIER=FL STK=1 UG=Mm.15807.1 LL=22340 DEF=Mus musculus vascular endothelial growth factor B precursor (VEGF-B) mRNA, complete cds. /PROD=vascular endothelial growth factor B precursor FL-gb NM_043837.1 gb U48800.1                                                                                                                                                                                                                                                                                                                                                                    | 3644.2334 | 921.23413 | 1713.7333 | 417.65958 | 3.3057415 | 2.0 | 0.08060011  | 0.2749443  | 0.47 | 2.13 | gb AF151792 UG_GENE=Pp2b1A DEF=Mus musculus, protein phosphatase 2 (formerly 2A), regulatory subunit A (PR 65), alpha isoform, clone MGC:7086 IMAGE:3157293, mRNA, complete cds. /PROD=protein phosphatase 2 (formerly 2A), regulatory subunit A (PR 65), alpha isoform FL-gb NM_016891.1 gb BC006606.1 gb AB021743.1                                                                                                                                                                                                                                                                                                                                     | 2269.7334 | 651.43805 | 1033.5333 | 312.80685 | 2.9629393 | 2.0 | 0.097528845 | 0.2759537  | 0.46 | 2.2  | gb AF302138.1 DB_XREF=gi:15420074 FEA=FLmRNA CNT=158 TID=Mm.22029.1 TIER=FL+Slack STK=86 UG=Mm.22029.1 LL=10222 UG_GENE=Hs7 DEF=Mus musculus Hs7-interacting protein kinase mRNAs, complete cds. /PROD=Hs7-interacting protein kinase FL-gb BC18463.1 gb AF302138.1 gb BC004756.1                                                                                                                                                                                                                                                                                                                                                      | 1104.3334 | 297.56613 | 577.73334 | 241.51155 | 2.3799613 | 3.0 | 0.097621255 | 0.27409044 | 0.52 | 1.91 | gb AK008049.1 DB_XREF=gi:12840262 GEN=Mg1 FEA=mRNA CNT=5 TID=Mm.194795.3 TIER=ConsEnd STK=0 UG=Mm.194795.3 LL=23945 UG_TITLE=monoglyceride lipase DEF=Mus musculus adult male testis cDNA, RIKEN full-length enriched library, clone:1700474K monoglyceride lipase, full insert sequence.                                                                                                                                                                                                                                                                                                                                              | 1528.3666 | 498.10037 | 664.73334 | 387.59006 | 2.3701098 | 3.0 | 0.0984942   | 0.27444304 | 0.43 | 2.3  | gb BC021405.1 DB_XREF=gi:13007473 FEA=FLmRNA CNT=557 TID=Mm.1034.1 TIER=FL+Slack STK=330 UG=Mm.1034.1 LL=51792 UG_GENE=Pp2b1A DEF=Mus musculus, protein phosphatase 2 (formerly 2A), regulatory subunit A (PR 65), alpha isoform, clone MGC:7086 IMAGE:3157293, mRNA, complete cds. /PROD=protein phosphatase 2 (formerly 2A), regulatory subunit A (PR 65), alpha isoform FL-gb NM_016891.1 gb BC006606.1 gb AB021743.1                                                                                                                                                                                                               | 1429.6333 | 272.46213 | 914.4666  | 261.58444 | 2.362404  | 3.0 | 0.099183634 | 0.27425778 | 0.64 | 1.56 | gb BM196939 DB_XREF=gi:17748959 DB_XREF=0304006.3 CLONE=0304006.3 FEA=mRNA CNT=57 TID=Mm.220848.1 TIER=Slack STK=16 UG=Mm.220848 UG_TITLE=Slack DEF=Mus musculus, similar to putative, clone MGC:5345087, mRNA, partial cds. /PROD=Slack FL-gb NM_0207247.1 gb AF128192.1 gb AF128191.1 gb MS8004.1 gb BC002073.1 gb AF128190.1 gb AF128189.1 gb AF128188.1                                                                                                                                                                                                                                                                            | 366.83334 | 48.94613  | 229.76666 | 88.11454  | 2.355309  | 3.0 | 0.09982363  | 0.27395207 | 0.63 | 1.6  | gb NM_023631.1 DB_XREF=gi:12072471 FEA=FLmRNA CNT=119 TID=Mm.21897.1 TIER=FL+Slack STK=30 UG=Mm.21897.1 LL=11923 UG_GENE=Cn2-pending UG_TITLE=RIKEN cDNA Z1310039H17 gene (DEF=Mus musculus ES cells cDNA, RIKEN full-length enriched library, clone:2410043M02.gtg) assembly stacking protein 2, full insert sequence.                                                                                                                                                                                                                                                                                                                | 687.3     | 287.4756  | 202.13335 | 12.589808 | 2.9203472 | 2.0 | 0.09997883  | 0.2723304  | 0.29 | 3.4  | gb BC003744.1 DB_XREF=gi:13277677 FEA=FLmRNA CNT=135 TID=Mm.3234.1 TIER=FL+Slack STK=52 UG=Mm.3234.1 LL=19060 UG_GENE=Pp2b DEF=Mus musculus, protein phosphatase 5, catalytic subunit, clone MGC:5847 IMAGE:3599302, mRNA, complete cds. /PROD=protein phosphatase 5, catalytic subunit FL-gb U25809.1 gb BC001468.1 gb BC001864.1 DB_XREF=gi:1284269 FEA=FLmRNA CNT=29 TID=Mm.23836.1 TIER=Slack STK=23 UG=Mm.23836.1 LL=70231 UG_GENE=Cn2-pending UG_TITLE=RIKEN cDNA Z1310039H17 gene (DEF=Mus musculus ES cells cDNA, RIKEN full-length enriched library, clone:2410043M02.gtg) assembly stacking protein 2, full insert sequence. | 1420.2334 | 425.87183 | 649.23334 | 171.36757 | 2.9095585 | 2.0 | 0.10061329  | 0.27202854 | 0.46 | 2.19 | gb NM_130880.1 DB_XREF=gi:18698997 GEN=Cdk9 FEA=FLmRNA CNT=119 TID=Mm.27557.1 TIER=FL+Slack STK=50 UG=Mm.27557.1 LL=107951 DEF=Mus musculus cyclin-dependent kinase 9 (CDC-related kinase) (Cdk9), mRNA. /PROD=cyclin-dependent kinase 9 FL-gb AF327431.1 gb BC003901.1 gb NM_130860.1                                                                                                                                                                                                                                                                                                                                                 | 513.26666 | 108.13493 | 311.26666 | 103.22113 | 2.340426  | 3.0 | 0.1011825   | 0.271556   | 0.61 | 1.65 | gb NM_010742.1 DB_XREF=gi:7940177 GEN=Cdc37 FEA=FLmRNA CNT=193 TID=Mm.4117.1 TIER=FL+Slack STK=68 UG=Mm.4117.1 LL=12536 UG_GENE=Cdc37 DEF=Mus musculus cyclin division cycle 37 homolog (S. cerevisiae) (Cdc37), mRNA. /PROD=cyclin division cycle 37 homolog (S. cerevisiae) FL-gb U43076.1 gb NM_016742.1                                                                                                                                                                                                                                                                                                                            | 5240.6997 | 1181.1212 | 3308.3665 | 816.72766 | 2.3307126 | 3.0 | 0.10208148  | 0.2719689  | 0.63 | 1.58 | gb BC002148.1 DB_XREF=gi:12805356 FEA=FLmRNA CNT=59 TID=Mm.582.2 TIER=FL+Slack STK=49 UG=Mm.582.1 LL=11770 UG_GENE=fbp4 DEF=Mus musculus, clone MGC:7265 IMAGE:3484864, mRNA, complete cds. /PROD=Unknown (protein for MGC:7265) FL-gb BC002148.1                                                                                                                                                                                                                                                                                                                                                                                      | 610.1333  | 54.303703 | 384.66666 | 124.90342 | 2.8673048 | 2.0 | 0.103153974 | 0.27283478 | 0.63 | 1.59 | gb NM_031260.1 DB_XREF=gi:13994126 FEA=Mov101 FEA=FLmRNA CNT=18 TID=Mm.102985.1 TIER=FL+Slack STK=11 UG=Mm.102985.1 LL=83456 DEF=Mus musculus Moloney leukemia virus 10-like 1 (Mov10), mRNA. /PROD=Moloney leukemia virus 10-like 1 FL-gb AF285587.1 gb AF340211.1 gb NM_031260.1                                                                                                                                                                                                                                                                                                                                                     | 3885.3    | 658.83813 | 2512.8667 | 787.5243  | 2.3151417 | 3.0 | 0.10354287  | 0.27189314 | 0.65 | 1.55 | gb NM_019652.1 DB_XREF=gi:12025541 GEN=Anaf1 FEA=FLmRNA CNT=69 TID=Mm.41475.1 TIER=FL+Slack STK=26 UG=Mm.41475.1 LL=56495 DEF=Mus musculus ara (bacterial) anisole transporter, ATP-binding, homolog 1 (Anaf1), mRNA. /PROD=ara (bacterial) anisole transporter ATP-binding, homolog 1 FL-gb AF039405.2 gb NM_019652.1 gb BC016453.1 gb BC018430.1 gb NM_133777.1 DB_XREF=gi:19527003 GEN=BT2046SF12Rk FEA=FLmRNA CNT=180 TID=Mm.22491.1 TIER=FL+Slack STK=71 UG=Mm.22491.1 LL=77891 DEF=Mus mus                                                                                                                                       |           |           |           |           |           |     |             |            |      |      |                                                                                                                                                                                                                                                                                                                                                                                                                                                                                                  |           |           |           |           |           |     |             |            |      |      |                                                                                                                                                                                                                                                                                                                                                                                                                                                                                                  |           |           |           |           |           |     |             |            |      |      |                                                                                                                                                                                                                                                                                                                                                                                                                                                                                                  |          |           |           |           |           |     |             |            |      |      |                                                                                                                                                                                                                                                                                                                                                                                                                                                                                                  |        |           |           |          |           |     |            |            |      |      |                                                                                                                                                                                                                                                                                                                                                                                                                                                                                                  |
| gb BC026669.1 DB_XREF=gi:1234824 FEA=FLmRNA CNT=77 TID=Mm.15807.2 TIER=FL STK=1 UG=Mm.15807.1 LL=22340 DEF=Mus musculus vascular endothelial growth factor B precursor (VEGF-B) mRNA, complete cds. /PROD=vascular endothelial growth factor B precursor FL-gb NM_043837.1 gb U48800.1                                                                                                                                                                                                                                                                                                                                                                    | 3644.2334  | 921.23413 | 1713.7333 | 417.65958 | 3.3057415 | 2.0 | 0.08060011  | 0.2749443  | 0.47 | 2.13 | gb AF151792 UG_GENE=Pp2b1A DEF=Mus musculus, protein phosphatase 2 (formerly 2A), regulatory subunit A (PR 65), alpha isoform, clone MGC:7086 IMAGE:3157293, mRNA, complete cds. /PROD=protein phosphatase 2 (formerly 2A), regulatory subunit A (PR 65), alpha isoform FL-gb NM_016891.1 gb BC006606.1 gb AB021743.1                                                                                                                                                                                                                                                                                                                                     | 2269.7334 | 651.43805 | 1033.5333 | 312.80685 | 2.9629393 | 2.0 | 0.097528845 | 0.2759537  | 0.46 | 2.2  | gb AF302138.1 DB_XREF=gi:15420074 FEA=FLmRNA CNT=158 TID=Mm.22029.1 TIER=FL+Slack STK=86 UG=Mm.22029.1 LL=10222 UG_GENE=Hs7 DEF=Mus musculus Hs7-interacting protein kinase mRNAs, complete cds. /PROD=Hs7-interacting protein kinase FL-gb BC18463.1 gb AF302138.1 gb BC004756.1                                                                                                                                                                                                                                                                                                                                                                         | 1104.3334 | 297.56613 | 577.73334 | 241.51155 | 2.3799613 | 3.0 | 0.097621255 | 0.27409044 | 0.52 | 1.91 | gb AK008049.1 DB_XREF=gi:12840262 GEN=Mg1 FEA=mRNA CNT=5 TID=Mm.194795.3 TIER=ConsEnd STK=0 UG=Mm.194795.3 LL=23945 UG_TITLE=monoglyceride lipase DEF=Mus musculus adult male testis cDNA, RIKEN full-length enriched library, clone:1700474K monoglyceride lipase, full insert sequence.                                                                                                                                                                                                                                                                                                                                              | 1528.3666 | 498.10037 | 664.73334 | 387.59006 | 2.3701098 | 3.0 | 0.0984942   | 0.27444304 | 0.43 | 2.3  | gb BC021405.1 DB_XREF=gi:13007473 FEA=FLmRNA CNT=557 TID=Mm.1034.1 TIER=FL+Slack STK=330 UG=Mm.1034.1 LL=51792 UG_GENE=Pp2b1A DEF=Mus musculus, protein phosphatase 2 (formerly 2A), regulatory subunit A (PR 65), alpha isoform, clone MGC:7086 IMAGE:3157293, mRNA, complete cds. /PROD=protein phosphatase 2 (formerly 2A), regulatory subunit A (PR 65), alpha isoform FL-gb NM_016891.1 gb BC006606.1 gb AB021743.1                                                                                                                                                                                                               | 1429.6333 | 272.46213 | 914.4666  | 261.58444 | 2.362404  | 3.0 | 0.099183634 | 0.27425778 | 0.64 | 1.56 | gb BM196939 DB_XREF=gi:17748959 DB_XREF=0304006.3 CLONE=0304006.3 FEA=mRNA CNT=57 TID=Mm.220848.1 TIER=Slack STK=16 UG=Mm.220848 UG_TITLE=Slack DEF=Mus musculus, similar to putative, clone MGC:5345087, mRNA, partial cds. /PROD=Slack FL-gb NM_0207247.1 gb AF128192.1 gb AF128191.1 gb MS8004.1 gb BC002073.1 gb AF128190.1 gb AF128189.1 gb AF128188.1                                                                                                                                                                                                                                                                            | 366.83334 | 48.94613  | 229.76666 | 88.11454  | 2.355309  | 3.0 | 0.09982363  | 0.27395207 | 0.63 | 1.6  | gb NM_023631.1 DB_XREF=gi:12072471 FEA=FLmRNA CNT=119 TID=Mm.21897.1 TIER=FL+Slack STK=30 UG=Mm.21897.1 LL=11923 UG_GENE=Cn2-pending UG_TITLE=RIKEN cDNA Z1310039H17 gene (DEF=Mus musculus ES cells cDNA, RIKEN full-length enriched library, clone:2410043M02.gtg) assembly stacking protein 2, full insert sequence.                                                                                                                                                                                                                                                                                                                | 687.3     | 287.4756  | 202.13335 | 12.589808 | 2.9203472 | 2.0 | 0.09997883  | 0.2723304  | 0.29 | 3.4  | gb BC003744.1 DB_XREF=gi:13277677 FEA=FLmRNA CNT=135 TID=Mm.3234.1 TIER=FL+Slack STK=52 UG=Mm.3234.1 LL=19060 UG_GENE=Pp2b DEF=Mus musculus, protein phosphatase 5, catalytic subunit, clone MGC:5847 IMAGE:3599302, mRNA, complete cds. /PROD=protein phosphatase 5, catalytic subunit FL-gb U25809.1 gb BC001468.1 gb BC001864.1 DB_XREF=gi:1284269 FEA=FLmRNA CNT=29 TID=Mm.23836.1 TIER=Slack STK=23 UG=Mm.23836.1 LL=70231 UG_GENE=Cn2-pending UG_TITLE=RIKEN cDNA Z1310039H17 gene (DEF=Mus musculus ES cells cDNA, RIKEN full-length enriched library, clone:2410043M02.gtg) assembly stacking protein 2, full insert sequence. | 1420.2334 | 425.87183 | 649.23334 | 171.36757 | 2.9095585 | 2.0 | 0.10061329  | 0.27202854 | 0.46 | 2.19 | gb NM_130880.1 DB_XREF=gi:18698997 GEN=Cdk9 FEA=FLmRNA CNT=119 TID=Mm.27557.1 TIER=FL+Slack STK=50 UG=Mm.27557.1 LL=107951 DEF=Mus musculus cyclin-dependent kinase 9 (CDC-related kinase) (Cdk9), mRNA. /PROD=cyclin-dependent kinase 9 FL-gb AF327431.1 gb BC003901.1 gb NM_130860.1                                                                                                                                                                                                                                                                                                                                                 | 513.26666 | 108.13493 | 311.26666 | 103.22113 | 2.340426  | 3.0 | 0.1011825   | 0.271556   | 0.61 | 1.65 | gb NM_010742.1 DB_XREF=gi:7940177 GEN=Cdc37 FEA=FLmRNA CNT=193 TID=Mm.4117.1 TIER=FL+Slack STK=68 UG=Mm.4117.1 LL=12536 UG_GENE=Cdc37 DEF=Mus musculus cyclin division cycle 37 homolog (S. cerevisiae) (Cdc37), mRNA. /PROD=cyclin division cycle 37 homolog (S. cerevisiae) FL-gb U43076.1 gb NM_016742.1                                                                                                                                                                                                                                                                                                                            | 5240.6997 | 1181.1212 | 3308.3665 | 816.72766 | 2.3307126 | 3.0 | 0.10208148  | 0.2719689  | 0.63 | 1.58 | gb BC002148.1 DB_XREF=gi:12805356 FEA=FLmRNA CNT=59 TID=Mm.582.2 TIER=FL+Slack STK=49 UG=Mm.582.1 LL=11770 UG_GENE=fbp4 DEF=Mus musculus, clone MGC:7265 IMAGE:3484864, mRNA, complete cds. /PROD=Unknown (protein for MGC:7265) FL-gb BC002148.1                                                                                                                                                                                                                                                                                                                                                                                      | 610.1333  | 54.303703 | 384.66666 | 124.90342 | 2.8673048 | 2.0 | 0.103153974 | 0.27283478 | 0.63 | 1.59 | gb NM_031260.1 DB_XREF=gi:13994126 FEA=Mov101 FEA=FLmRNA CNT=18 TID=Mm.102985.1 TIER=FL+Slack STK=11 UG=Mm.102985.1 LL=83456 DEF=Mus musculus Moloney leukemia virus 10-like 1 (Mov10), mRNA. /PROD=Moloney leukemia virus 10-like 1 FL-gb AF285587.1 gb AF340211.1 gb NM_031260.1                                                                                                                                                                                                                                                                                                                                                     | 3885.3    | 658.83813 | 2512.8667 | 787.5243  | 2.3151417 | 3.0 | 0.10354287  | 0.27189314 | 0.65 | 1.55 | gb NM_019652.1 DB_XREF=gi:12025541 GEN=Anaf1 FEA=FLmRNA CNT=69 TID=Mm.41475.1 TIER=FL+Slack STK=26 UG=Mm.41475.1 LL=56495 DEF=Mus musculus ara (bacterial) anisole transporter, ATP-binding, homolog 1 (Anaf1), mRNA. /PROD=ara (bacterial) anisole transporter ATP-binding, homolog 1 FL-gb AF039405.2 gb NM_019652.1 gb BC016453.1 gb BC018430.1 gb NM_133777.1 DB_XREF=gi:19527003 GEN=BT2046SF12Rk FEA=FLmRNA CNT=180 TID=Mm.22491.1 TIER=FL+Slack STK=71 UG=Mm.22491.1 LL=77891 DEF=Mus mus                                                                                                                                       |           |           |           |           |           |     |             |            |      |      |                                                                                                                                                                                                                                                                                                                                                                                                                                                                                                                                                                                                                                        |           |           |           |           |           |     |             |            |      |      |                                                                                                                                                                                                                                                                                                                                                                                                                                                                                                  |           |           |           |           |           |     |             |            |      |      |                                                                                                                                                                                                                                                                                                                                                                                                                                                                                                  |           |           |           |           |           |     |             |            |      |      |                                                                                                                                                                                                                                                                                                                                                                                                                                                                                                  |          |           |           |           |           |     |             |            |      |      |                                                                                                                                                                                                                                                                                                                                                                                                                                                                                                  |        |           |           |          |           |     |            |            |      |      |                                                                                                                                                                                                                                                                                                                                                                                                                                                                                                  |
| gb AF151792 UG_GENE=Pp2b1A DEF=Mus musculus, protein phosphatase 2 (formerly 2A), regulatory subunit A (PR 65), alpha isoform, clone MGC:7086 IMAGE:3157293, mRNA, complete cds. /PROD=protein phosphatase 2 (formerly 2A), regulatory subunit A (PR 65), alpha isoform FL-gb NM_016891.1 gb BC006606.1 gb AB021743.1                                                                                                                                                                                                                                                                                                                                     | 2269.7334  | 651.43805 | 1033.5333 | 312.80685 | 2.9629393 | 2.0 | 0.097528845 | 0.2759537  | 0.46 | 2.2  | gb AF302138.1 DB_XREF=gi:15420074 FEA=FLmRNA CNT=158 TID=Mm.22029.1 TIER=FL+Slack STK=86 UG=Mm.22029.1 LL=10222 UG_GENE=Hs7 DEF=Mus musculus Hs7-interacting protein kinase mRNAs, complete cds. /PROD=Hs7-interacting protein kinase FL-gb BC18463.1 gb AF302138.1 gb BC004756.1                                                                                                                                                                                                                                                                                                                                                                         | 1104.3334 | 297.56613 | 577.73334 | 241.51155 | 2.3799613 | 3.0 | 0.097621255 | 0.27409044 | 0.52 | 1.91 | gb AK008049.1 DB_XREF=gi:12840262 GEN=Mg1 FEA=mRNA CNT=5 TID=Mm.194795.3 TIER=ConsEnd STK=0 UG=Mm.194795.3 LL=23945 UG_TITLE=monoglyceride lipase DEF=Mus musculus adult male testis cDNA, RIKEN full-length enriched library, clone:1700474K monoglyceride lipase, full insert sequence.                                                                                                                                                                                                                                                                                                                                                                 | 1528.3666 | 498.10037 | 664.73334 | 387.59006 | 2.3701098 | 3.0 | 0.0984942   | 0.27444304 | 0.43 | 2.3  | gb BC021405.1 DB_XREF=gi:13007473 FEA=FLmRNA CNT=557 TID=Mm.1034.1 TIER=FL+Slack STK=330 UG=Mm.1034.1 LL=51792 UG_GENE=Pp2b1A DEF=Mus musculus, protein phosphatase 2 (formerly 2A), regulatory subunit A (PR 65), alpha isoform, clone MGC:7086 IMAGE:3157293, mRNA, complete cds. /PROD=protein phosphatase 2 (formerly 2A), regulatory subunit A (PR 65), alpha isoform FL-gb NM_016891.1 gb BC006606.1 gb AB021743.1                                                                                                                                                                                                               | 1429.6333 | 272.46213 | 914.4666  | 261.58444 | 2.362404  | 3.0 | 0.099183634 | 0.27425778 | 0.64 | 1.56 | gb BM196939 DB_XREF=gi:17748959 DB_XREF=0304006.3 CLONE=0304006.3 FEA=mRNA CNT=57 TID=Mm.220848.1 TIER=Slack STK=16 UG=Mm.220848 UG_TITLE=Slack DEF=Mus musculus, similar to putative, clone MGC:5345087, mRNA, partial cds. /PROD=Slack FL-gb NM_0207247.1 gb AF128192.1 gb AF128191.1 gb MS8004.1 gb BC002073.1 gb AF128190.1 gb AF128189.1 gb AF128188.1                                                                                                                                                                                                                                                                            | 366.83334 | 48.94613  | 229.76666 | 88.11454  | 2.355309  | 3.0 | 0.09982363  | 0.27395207 | 0.63 | 1.6  | gb NM_023631.1 DB_XREF=gi:12072471 FEA=FLmRNA CNT=119 TID=Mm.21897.1 TIER=FL+Slack STK=30 UG=Mm.21897.1 LL=11923 UG_GENE=Cn2-pending UG_TITLE=RIKEN cDNA Z1310039H17 gene (DEF=Mus musculus ES cells cDNA, RIKEN full-length enriched library, clone:2410043M02.gtg) assembly stacking protein 2, full insert sequence.                                                                                                                                                                                                                                                                                                                | 687.3     | 287.4756  | 202.13335 | 12.589808 | 2.9203472 | 2.0 | 0.09997883  | 0.2723304  | 0.29 | 3.4  | gb BC003744.1 DB_XREF=gi:13277677 FEA=FLmRNA CNT=135 TID=Mm.3234.1 TIER=FL+Slack STK=52 UG=Mm.3234.1 LL=19060 UG_GENE=Pp2b DEF=Mus musculus, protein phosphatase 5, catalytic subunit, clone MGC:5847 IMAGE:3599302, mRNA, complete cds. /PROD=protein phosphatase 5, catalytic subunit FL-gb U25809.1 gb BC001468.1 gb BC001864.1 DB_XREF=gi:1284269 FEA=FLmRNA CNT=29 TID=Mm.23836.1 TIER=Slack STK=23 UG=Mm.23836.1 LL=70231 UG_GENE=Cn2-pending UG_TITLE=RIKEN cDNA Z1310039H17 gene (DEF=Mus musculus ES cells cDNA, RIKEN full-length enriched library, clone:2410043M02.gtg) assembly stacking protein 2, full insert sequence. | 1420.2334 | 425.87183 | 649.23334 | 171.36757 | 2.9095585 | 2.0 | 0.10061329  | 0.27202854 | 0.46 | 2.19 | gb NM_130880.1 DB_XREF=gi:18698997 GEN=Cdk9 FEA=FLmRNA CNT=119 TID=Mm.27557.1 TIER=FL+Slack STK=50 UG=Mm.27557.1 LL=107951 DEF=Mus musculus cyclin-dependent kinase 9 (CDC-related kinase) (Cdk9), mRNA. /PROD=cyclin-dependent kinase 9 FL-gb AF327431.1 gb BC003901.1 gb NM_130860.1                                                                                                                                                                                                                                                                                                                                                 | 513.26666 | 108.13493 | 311.26666 | 103.22113 | 2.340426  | 3.0 | 0.1011825   | 0.271556   | 0.61 | 1.65 | gb NM_010742.1 DB_XREF=gi:7940177 GEN=Cdc37 FEA=FLmRNA CNT=193 TID=Mm.4117.1 TIER=FL+Slack STK=68 UG=Mm.4117.1 LL=12536 UG_GENE=Cdc37 DEF=Mus musculus cyclin division cycle 37 homolog (S. cerevisiae) (Cdc37), mRNA. /PROD=cyclin division cycle 37 homolog (S. cerevisiae) FL-gb U43076.1 gb NM_016742.1                                                                                                                                                                                                                                                                                                                            | 5240.6997 | 1181.1212 | 3308.3665 | 816.72766 | 2.3307126 | 3.0 | 0.10208148  | 0.2719689  | 0.63 | 1.58 | gb BC002148.1 DB_XREF=gi:12805356 FEA=FLmRNA CNT=59 TID=Mm.582.2 TIER=FL+Slack STK=49 UG=Mm.582.1 LL=11770 UG_GENE=fbp4 DEF=Mus musculus, clone MGC:7265 IMAGE:3484864, mRNA, complete cds. /PROD=Unknown (protein for MGC:7265) FL-gb BC002148.1                                                                                                                                                                                                                                                                                                                                                                                      | 610.1333  | 54.303703 | 384.66666 | 124.90342 | 2.8673048 | 2.0 | 0.103153974 | 0.27283478 | 0.63 | 1.59 | gb NM_031260.1 DB_XREF=gi:13994126 FEA=Mov101 FEA=FLmRNA CNT=18 TID=Mm.102985.1 TIER=FL+Slack STK=11 UG=Mm.102985.1 LL=83456 DEF=Mus musculus Moloney leukemia virus 10-like 1 (Mov10), mRNA. /PROD=Moloney leukemia virus 10-like 1 FL-gb AF285587.1 gb AF340211.1 gb NM_031260.1                                                                                                                                                                                                                                                                                                                                                     | 3885.3    | 658.83813 | 2512.8667 | 787.5243  | 2.3151417 | 3.0 | 0.10354287  | 0.27189314 | 0.65 | 1.55 | gb NM_019652.1 DB_XREF=gi:12025541 GEN=Anaf1 FEA=FLmRNA CNT=69 TID=Mm.41475.1 TIER=FL+Slack STK=26 UG=Mm.41475.1 LL=56495 DEF=Mus musculus ara (bacterial) anisole transporter, ATP-binding, homolog 1 (Anaf1), mRNA. /PROD=ara (bacterial) anisole transporter ATP-binding, homolog 1 FL-gb AF039405.2 gb NM_019652.1 gb BC016453.1 gb BC018430.1 gb NM_133777.1 DB_XREF=gi:19527003 GEN=BT2046SF12Rk FEA=FLmRNA CNT=180 TID=Mm.22491.1 TIER=FL+Slack STK=71 UG=Mm.22491.1 LL=77891 DEF=Mus mus                                                                                                                                       |           |           |           |           |           |     |             |            |      |      |                                                                                                                                                                                                                                                                                                                                                                                                                                                                                                                                                                                                                                        |           |           |           |           |           |     |             |            |      |      |                                                                                                                                                                                                                                                                                                                                                                                                                                                                                                                                                                                                                                        |           |           |           |           |           |     |             |            |      |      |                                                                                                                                                                                                                                                                                                                                                                                                                                                                                                  |           |           |           |           |           |     |             |            |      |      |                                                                                                                                                                                                                                                                                                                                                                                                                                                                                                  |           |           |           |           |           |     |             |            |      |      |                                                                                                                                                                                                                                                                                                                                                                                                                                                                                                  |          |           |           |           |           |     |             |            |      |      |                                                                                                                                                                                                                                                                                                                                                                                                                                                                                                  |        |           |           |          |           |     |            |            |      |      |                                                                                                                                                                                                                                                                                                                                                                                                                                                                                                  |
| gb AF302138.1 DB_XREF=gi:15420074 FEA=FLmRNA CNT=158 TID=Mm.22029.1 TIER=FL+Slack STK=86 UG=Mm.22029.1 LL=10222 UG_GENE=Hs7 DEF=Mus musculus Hs7-interacting protein kinase mRNAs, complete cds. /PROD=Hs7-interacting protein kinase FL-gb BC18463.1 gb AF302138.1 gb BC004756.1                                                                                                                                                                                                                                                                                                                                                                         | 1104.3334  | 297.56613 | 577.73334 | 241.51155 | 2.3799613 | 3.0 | 0.097621255 | 0.27409044 | 0.52 | 1.91 | gb AK008049.1 DB_XREF=gi:12840262 GEN=Mg1 FEA=mRNA CNT=5 TID=Mm.194795.3 TIER=ConsEnd STK=0 UG=Mm.194795.3 LL=23945 UG_TITLE=monoglyceride lipase DEF=Mus musculus adult male testis cDNA, RIKEN full-length enriched library, clone:1700474K monoglyceride lipase, full insert sequence.                                                                                                                                                                                                                                                                                                                                                                 | 1528.3666 | 498.10037 | 664.73334 | 387.59006 | 2.3701098 | 3.0 | 0.0984942   | 0.27444304 | 0.43 | 2.3  | gb BC021405.1 DB_XREF=gi:13007473 FEA=FLmRNA CNT=557 TID=Mm.1034.1 TIER=FL+Slack STK=330 UG=Mm.1034.1 LL=51792 UG_GENE=Pp2b1A DEF=Mus musculus, protein phosphatase 2 (formerly 2A), regulatory subunit A (PR 65), alpha isoform, clone MGC:7086 IMAGE:3157293, mRNA, complete cds. /PROD=protein phosphatase 2 (formerly 2A), regulatory subunit A (PR 65), alpha isoform FL-gb NM_016891.1 gb BC006606.1 gb AB021743.1                                                                                                                                                                                                                                  | 1429.6333 | 272.46213 | 914.4666  | 261.58444 | 2.362404  | 3.0 | 0.099183634 | 0.27425778 | 0.64 | 1.56 | gb BM196939 DB_XREF=gi:17748959 DB_XREF=0304006.3 CLONE=0304006.3 FEA=mRNA CNT=57 TID=Mm.220848.1 TIER=Slack STK=16 UG=Mm.220848 UG_TITLE=Slack DEF=Mus musculus, similar to putative, clone MGC:5345087, mRNA, partial cds. /PROD=Slack FL-gb NM_0207247.1 gb AF128192.1 gb AF128191.1 gb MS8004.1 gb BC002073.1 gb AF128190.1 gb AF128189.1 gb AF128188.1                                                                                                                                                                                                                                                                            | 366.83334 | 48.94613  | 229.76666 | 88.11454  | 2.355309  | 3.0 | 0.09982363  | 0.27395207 | 0.63 | 1.6  | gb NM_023631.1 DB_XREF=gi:12072471 FEA=FLmRNA CNT=119 TID=Mm.21897.1 TIER=FL+Slack STK=30 UG=Mm.21897.1 LL=11923 UG_GENE=Cn2-pending UG_TITLE=RIKEN cDNA Z1310039H17 gene (DEF=Mus musculus ES cells cDNA, RIKEN full-length enriched library, clone:2410043M02.gtg) assembly stacking protein 2, full insert sequence.                                                                                                                                                                                                                                                                                                                | 687.3     | 287.4756  | 202.13335 | 12.589808 | 2.9203472 | 2.0 | 0.09997883  | 0.2723304  | 0.29 | 3.4  | gb BC003744.1 DB_XREF=gi:13277677 FEA=FLmRNA CNT=135 TID=Mm.3234.1 TIER=FL+Slack STK=52 UG=Mm.3234.1 LL=19060 UG_GENE=Pp2b DEF=Mus musculus, protein phosphatase 5, catalytic subunit, clone MGC:5847 IMAGE:3599302, mRNA, complete cds. /PROD=protein phosphatase 5, catalytic subunit FL-gb U25809.1 gb BC001468.1 gb BC001864.1 DB_XREF=gi:1284269 FEA=FLmRNA CNT=29 TID=Mm.23836.1 TIER=Slack STK=23 UG=Mm.23836.1 LL=70231 UG_GENE=Cn2-pending UG_TITLE=RIKEN cDNA Z1310039H17 gene (DEF=Mus musculus ES cells cDNA, RIKEN full-length enriched library, clone:2410043M02.gtg) assembly stacking protein 2, full insert sequence. | 1420.2334 | 425.87183 | 649.23334 | 171.36757 | 2.9095585 | 2.0 | 0.10061329  | 0.27202854 | 0.46 | 2.19 | gb NM_130880.1 DB_XREF=gi:18698997 GEN=Cdk9 FEA=FLmRNA CNT=119 TID=Mm.27557.1 TIER=FL+Slack STK=50 UG=Mm.27557.1 LL=107951 DEF=Mus musculus cyclin-dependent kinase 9 (CDC-related kinase) (Cdk9), mRNA. /PROD=cyclin-dependent kinase 9 FL-gb AF327431.1 gb BC003901.1 gb NM_130860.1                                                                                                                                                                                                                                                                                                                                                 | 513.26666 | 108.13493 | 311.26666 | 103.22113 | 2.340426  | 3.0 | 0.1011825   | 0.271556   | 0.61 | 1.65 | gb NM_010742.1 DB_XREF=gi:7940177 GEN=Cdc37 FEA=FLmRNA CNT=193 TID=Mm.4117.1 TIER=FL+Slack STK=68 UG=Mm.4117.1 LL=12536 UG_GENE=Cdc37 DEF=Mus musculus cyclin division cycle 37 homolog (S. cerevisiae) (Cdc37), mRNA. /PROD=cyclin division cycle 37 homolog (S. cerevisiae) FL-gb U43076.1 gb NM_016742.1                                                                                                                                                                                                                                                                                                                            | 5240.6997 | 1181.1212 | 3308.3665 | 816.72766 | 2.3307126 | 3.0 | 0.10208148  | 0.2719689  | 0.63 | 1.58 | gb BC002148.1 DB_XREF=gi:12805356 FEA=FLmRNA CNT=59 TID=Mm.582.2 TIER=FL+Slack STK=49 UG=Mm.582.1 LL=11770 UG_GENE=fbp4 DEF=Mus musculus, clone MGC:7265 IMAGE:3484864, mRNA, complete cds. /PROD=Unknown (protein for MGC:7265) FL-gb BC002148.1                                                                                                                                                                                                                                                                                                                                                                                      | 610.1333  | 54.303703 | 384.66666 | 124.90342 | 2.8673048 | 2.0 | 0.103153974 | 0.27283478 | 0.63 | 1.59 | gb NM_031260.1 DB_XREF=gi:13994126 FEA=Mov101 FEA=FLmRNA CNT=18 TID=Mm.102985.1 TIER=FL+Slack STK=11 UG=Mm.102985.1 LL=83456 DEF=Mus musculus Moloney leukemia virus 10-like 1 (Mov10), mRNA. /PROD=Moloney leukemia virus 10-like 1 FL-gb AF285587.1 gb AF340211.1 gb NM_031260.1                                                                                                                                                                                                                                                                                                                                                     | 3885.3    | 658.83813 | 2512.8667 | 787.5243  | 2.3151417 | 3.0 | 0.10354287  | 0.27189314 | 0.65 | 1.55 | gb NM_019652.1 DB_XREF=gi:12025541 GEN=Anaf1 FEA=FLmRNA CNT=69 TID=Mm.41475.1 TIER=FL+Slack STK=26 UG=Mm.41475.1 LL=56495 DEF=Mus musculus ara (bacterial) anisole transporter, ATP-binding, homolog 1 (Anaf1), mRNA. /PROD=ara (bacterial) anisole transporter ATP-binding, homolog 1 FL-gb AF039405.2 gb NM_019652.1 gb BC016453.1 gb BC018430.1 gb NM_133777.1 DB_XREF=gi:19527003 GEN=BT2046SF12Rk FEA=FLmRNA CNT=180 TID=Mm.22491.1 TIER=FL+Slack STK=71 UG=Mm.22491.1 LL=77891 DEF=Mus mus                                                                                                                                       |           |           |           |           |           |     |             |            |      |      |                                                                                                                                                                                                                                                                                                                                                                                                                                                                                                                                                                                                                                        |           |           |           |           |           |     |             |            |      |      |                                                                                                                                                                                                                                                                                                                                                                                                                                                                                                                                                                                                                                        |           |           |           |           |           |     |             |            |      |      |                                                                                                                                                                                                                                                                                                                                                                                                                                                                                                                                                                                                                                        |           |           |           |           |           |     |             |            |      |      |                                                                                                                                                                                                                                                                                                                                                                                                                                                                                                  |           |           |           |           |           |     |             |            |      |      |                                                                                                                                                                                                                                                                                                                                                                                                                                                                                                  |           |           |           |           |           |     |             |            |      |      |                                                                                                                                                                                                                                                                                                                                                                                                                                                                                                  |          |           |           |           |           |     |             |            |      |      |                                                                                                                                                                                                                                                                                                                                                                                                                                                                                                  |        |           |           |          |           |     |            |            |      |      |                                                                                                                                                                                                                                                                                                                                                                                                                                                                                                  |
| gb AK008049.1 DB_XREF=gi:12840262 GEN=Mg1 FEA=mRNA CNT=5 TID=Mm.194795.3 TIER=ConsEnd STK=0 UG=Mm.194795.3 LL=23945 UG_TITLE=monoglyceride lipase DEF=Mus musculus adult male testis cDNA, RIKEN full-length enriched library, clone:1700474K monoglyceride lipase, full insert sequence.                                                                                                                                                                                                                                                                                                                                                                 | 1528.3666  | 498.10037 | 664.73334 | 387.59006 | 2.3701098 | 3.0 | 0.0984942   | 0.27444304 | 0.43 | 2.3  | gb BC021405.1 DB_XREF=gi:13007473 FEA=FLmRNA CNT=557 TID=Mm.1034.1 TIER=FL+Slack STK=330 UG=Mm.1034.1 LL=51792 UG_GENE=Pp2b1A DEF=Mus musculus, protein phosphatase 2 (formerly 2A), regulatory subunit A (PR 65), alpha isoform, clone MGC:7086 IMAGE:3157293, mRNA, complete cds. /PROD=protein phosphatase 2 (formerly 2A), regulatory subunit A (PR 65), alpha isoform FL-gb NM_016891.1 gb BC006606.1 gb AB021743.1                                                                                                                                                                                                                                  | 1429.6333 | 272.46213 | 914.4666  | 261.58444 | 2.362404  | 3.0 | 0.099183634 | 0.27425778 | 0.64 | 1.56 | gb BM196939 DB_XREF=gi:17748959 DB_XREF=0304006.3 CLONE=0304006.3 FEA=mRNA CNT=57 TID=Mm.220848.1 TIER=Slack STK=16 UG=Mm.220848 UG_TITLE=Slack DEF=Mus musculus, similar to putative, clone MGC:5345087, mRNA, partial cds. /PROD=Slack FL-gb NM_0207247.1 gb AF128192.1 gb AF128191.1 gb MS8004.1 gb BC002073.1 gb AF128190.1 gb AF128189.1 gb AF128188.1                                                                                                                                                                                                                                                                                               | 366.83334 | 48.94613  | 229.76666 | 88.11454  | 2.355309  | 3.0 | 0.09982363  | 0.27395207 | 0.63 | 1.6  | gb NM_023631.1 DB_XREF=gi:12072471 FEA=FLmRNA CNT=119 TID=Mm.21897.1 TIER=FL+Slack STK=30 UG=Mm.21897.1 LL=11923 UG_GENE=Cn2-pending UG_TITLE=RIKEN cDNA Z1310039H17 gene (DEF=Mus musculus ES cells cDNA, RIKEN full-length enriched library, clone:2410043M02.gtg) assembly stacking protein 2, full insert sequence.                                                                                                                                                                                                                                                                                                                | 687.3     | 287.4756  | 202.13335 | 12.589808 | 2.9203472 | 2.0 | 0.09997883  | 0.2723304  | 0.29 | 3.4  | gb BC003744.1 DB_XREF=gi:13277677 FEA=FLmRNA CNT=135 TID=Mm.3234.1 TIER=FL+Slack STK=52 UG=Mm.3234.1 LL=19060 UG_GENE=Pp2b DEF=Mus musculus, protein phosphatase 5, catalytic subunit, clone MGC:5847 IMAGE:3599302, mRNA, complete cds. /PROD=protein phosphatase 5, catalytic subunit FL-gb U25809.1 gb BC001468.1 gb BC001864.1 DB_XREF=gi:1284269 FEA=FLmRNA CNT=29 TID=Mm.23836.1 TIER=Slack STK=23 UG=Mm.23836.1 LL=70231 UG_GENE=Cn2-pending UG_TITLE=RIKEN cDNA Z1310039H17 gene (DEF=Mus musculus ES cells cDNA, RIKEN full-length enriched library, clone:2410043M02.gtg) assembly stacking protein 2, full insert sequence. | 1420.2334 | 425.87183 | 649.23334 | 171.36757 | 2.9095585 | 2.0 | 0.10061329  | 0.27202854 | 0.46 | 2.19 | gb NM_130880.1 DB_XREF=gi:18698997 GEN=Cdk9 FEA=FLmRNA CNT=119 TID=Mm.27557.1 TIER=FL+Slack STK=50 UG=Mm.27557.1 LL=107951 DEF=Mus musculus cyclin-dependent kinase 9 (CDC-related kinase) (Cdk9), mRNA. /PROD=cyclin-dependent kinase 9 FL-gb AF327431.1 gb BC003901.1 gb NM_130860.1                                                                                                                                                                                                                                                                                                                                                 | 513.26666 | 108.13493 | 311.26666 | 103.22113 | 2.340426  | 3.0 | 0.1011825   | 0.271556   | 0.61 | 1.65 | gb NM_010742.1 DB_XREF=gi:7940177 GEN=Cdc37 FEA=FLmRNA CNT=193 TID=Mm.4117.1 TIER=FL+Slack STK=68 UG=Mm.4117.1 LL=12536 UG_GENE=Cdc37 DEF=Mus musculus cyclin division cycle 37 homolog (S. cerevisiae) (Cdc37), mRNA. /PROD=cyclin division cycle 37 homolog (S. cerevisiae) FL-gb U43076.1 gb NM_016742.1                                                                                                                                                                                                                                                                                                                            | 5240.6997 | 1181.1212 | 3308.3665 | 816.72766 | 2.3307126 | 3.0 | 0.10208148  | 0.2719689  | 0.63 | 1.58 | gb BC002148.1 DB_XREF=gi:12805356 FEA=FLmRNA CNT=59 TID=Mm.582.2 TIER=FL+Slack STK=49 UG=Mm.582.1 LL=11770 UG_GENE=fbp4 DEF=Mus musculus, clone MGC:7265 IMAGE:3484864, mRNA, complete cds. /PROD=Unknown (protein for MGC:7265) FL-gb BC002148.1                                                                                                                                                                                                                                                                                                                                                                                      | 610.1333  | 54.303703 | 384.66666 | 124.90342 | 2.8673048 | 2.0 | 0.103153974 | 0.27283478 | 0.63 | 1.59 | gb NM_031260.1 DB_XREF=gi:13994126 FEA=Mov101 FEA=FLmRNA CNT=18 TID=Mm.102985.1 TIER=FL+Slack STK=11 UG=Mm.102985.1 LL=83456 DEF=Mus musculus Moloney leukemia virus 10-like 1 (Mov10), mRNA. /PROD=Moloney leukemia virus 10-like 1 FL-gb AF285587.1 gb AF340211.1 gb NM_031260.1                                                                                                                                                                                                                                                                                                                                                     | 3885.3    | 658.83813 | 2512.8667 | 787.5243  | 2.3151417 | 3.0 | 0.10354287  | 0.27189314 | 0.65 | 1.55 | gb NM_019652.1 DB_XREF=gi:12025541 GEN=Anaf1 FEA=FLmRNA CNT=69 TID=Mm.41475.1 TIER=FL+Slack STK=26 UG=Mm.41475.1 LL=56495 DEF=Mus musculus ara (bacterial) anisole transporter, ATP-binding, homolog 1 (Anaf1), mRNA. /PROD=ara (bacterial) anisole transporter ATP-binding, homolog 1 FL-gb AF039405.2 gb NM_019652.1 gb BC016453.1 gb BC018430.1 gb NM_133777.1 DB_XREF=gi:19527003 GEN=BT2046SF12Rk FEA=FLmRNA CNT=180 TID=Mm.22491.1 TIER=FL+Slack STK=71 UG=Mm.22491.1 LL=77891 DEF=Mus mus                                                                                                                                       |           |           |           |           |           |     |             |            |      |      |                                                                                                                                                                                                                                                                                                                                                                                                                                                                                                                                                                                                                                        |           |           |           |           |           |     |             |            |      |      |                                                                                                                                                                                                                                                                                                                                                                                                                                                                                                                                                                                                                                        |           |           |           |           |           |     |             |            |      |      |                                                                                                                                                                                                                                                                                                                                                                                                                                                                                                                                                                                                                                        |           |           |           |           |           |     |             |            |      |      |                                                                                                                                                                                                                                                                                                                                                                                                                                                                                                                                                                                                                                        |           |           |           |           |           |     |             |            |      |      |                                                                                                                                                                                                                                                                                                                                                                                                                                                                                                  |           |           |           |           |           |     |             |            |      |      |                                                                                                                                                                                                                                                                                                                                                                                                                                                                                                  |           |           |           |           |           |     |             |            |      |      |                                                                                                                                                                                                                                                                                                                                                                                                                                                                                                  |          |           |           |           |           |     |             |            |      |      |                                                                                                                                                                                                                                                                                                                                                                                                                                                                                                  |        |           |           |          |           |     |            |            |      |      |                                                                                                                                                                                                                                                                                                                                                                                                                                                                                                  |
| gb BC021405.1 DB_XREF=gi:13007473 FEA=FLmRNA CNT=557 TID=Mm.1034.1 TIER=FL+Slack STK=330 UG=Mm.1034.1 LL=51792 UG_GENE=Pp2b1A DEF=Mus musculus, protein phosphatase 2 (formerly 2A), regulatory subunit A (PR 65), alpha isoform, clone MGC:7086 IMAGE:3157293, mRNA, complete cds. /PROD=protein phosphatase 2 (formerly 2A), regulatory subunit A (PR 65), alpha isoform FL-gb NM_016891.1 gb BC006606.1 gb AB021743.1                                                                                                                                                                                                                                  | 1429.6333  | 272.46213 | 914.4666  | 261.58444 | 2.362404  | 3.0 | 0.099183634 | 0.27425778 | 0.64 | 1.56 | gb BM196939 DB_XREF=gi:17748959 DB_XREF=0304006.3 CLONE=0304006.3 FEA=mRNA CNT=57 TID=Mm.220848.1 TIER=Slack STK=16 UG=Mm.220848 UG_TITLE=Slack DEF=Mus musculus, similar to putative, clone MGC:5345087, mRNA, partial cds. /PROD=Slack FL-gb NM_0207247.1 gb AF128192.1 gb AF128191.1 gb MS8004.1 gb BC002073.1 gb AF128190.1 gb AF128189.1 gb AF128188.1                                                                                                                                                                                                                                                                                               | 366.83334 | 48.94613  | 229.76666 | 88.11454  | 2.355309  | 3.0 | 0.09982363  | 0.27395207 | 0.63 | 1.6  | gb NM_023631.1 DB_XREF=gi:12072471 FEA=FLmRNA CNT=119 TID=Mm.21897.1 TIER=FL+Slack STK=30 UG=Mm.21897.1 LL=11923 UG_GENE=Cn2-pending UG_TITLE=RIKEN cDNA Z1310039H17 gene (DEF=Mus musculus ES cells cDNA, RIKEN full-length enriched library, clone:2410043M02.gtg) assembly stacking protein 2, full insert sequence.                                                                                                                                                                                                                                                                                                                                   | 687.3     | 287.4756  | 202.13335 | 12.589808 | 2.9203472 | 2.0 | 0.09997883  | 0.2723304  | 0.29 | 3.4  | gb BC003744.1 DB_XREF=gi:13277677 FEA=FLmRNA CNT=135 TID=Mm.3234.1 TIER=FL+Slack STK=52 UG=Mm.3234.1 LL=19060 UG_GENE=Pp2b DEF=Mus musculus, protein phosphatase 5, catalytic subunit, clone MGC:5847 IMAGE:3599302, mRNA, complete cds. /PROD=protein phosphatase 5, catalytic subunit FL-gb U25809.1 gb BC001468.1 gb BC001864.1 DB_XREF=gi:1284269 FEA=FLmRNA CNT=29 TID=Mm.23836.1 TIER=Slack STK=23 UG=Mm.23836.1 LL=70231 UG_GENE=Cn2-pending UG_TITLE=RIKEN cDNA Z1310039H17 gene (DEF=Mus musculus ES cells cDNA, RIKEN full-length enriched library, clone:2410043M02.gtg) assembly stacking protein 2, full insert sequence. | 1420.2334 | 425.87183 | 649.23334 | 171.36757 | 2.9095585 | 2.0 | 0.10061329  | 0.27202854 | 0.46 | 2.19 | gb NM_130880.1 DB_XREF=gi:18698997 GEN=Cdk9 FEA=FLmRNA CNT=119 TID=Mm.27557.1 TIER=FL+Slack STK=50 UG=Mm.27557.1 LL=107951 DEF=Mus musculus cyclin-dependent kinase 9 (CDC-related kinase) (Cdk9), mRNA. /PROD=cyclin-dependent kinase 9 FL-gb AF327431.1 gb BC003901.1 gb NM_130860.1                                                                                                                                                                                                                                                                                                                                                 | 513.26666 | 108.13493 | 311.26666 | 103.22113 | 2.340426  | 3.0 | 0.1011825   | 0.271556   | 0.61 | 1.65 | gb NM_010742.1 DB_XREF=gi:7940177 GEN=Cdc37 FEA=FLmRNA CNT=193 TID=Mm.4117.1 TIER=FL+Slack STK=68 UG=Mm.4117.1 LL=12536 UG_GENE=Cdc37 DEF=Mus musculus cyclin division cycle 37 homolog (S. cerevisiae) (Cdc37), mRNA. /PROD=cyclin division cycle 37 homolog (S. cerevisiae) FL-gb U43076.1 gb NM_016742.1                                                                                                                                                                                                                                                                                                                            | 5240.6997 | 1181.1212 | 3308.3665 | 816.72766 | 2.3307126 | 3.0 | 0.10208148  | 0.2719689  | 0.63 | 1.58 | gb BC002148.1 DB_XREF=gi:12805356 FEA=FLmRNA CNT=59 TID=Mm.582.2 TIER=FL+Slack STK=49 UG=Mm.582.1 LL=11770 UG_GENE=fbp4 DEF=Mus musculus, clone MGC:7265 IMAGE:3484864, mRNA, complete cds. /PROD=Unknown (protein for MGC:7265) FL-gb BC002148.1                                                                                                                                                                                                                                                                                                                                                                                      | 610.1333  | 54.303703 | 384.66666 | 124.90342 | 2.8673048 | 2.0 | 0.103153974 | 0.27283478 | 0.63 | 1.59 | gb NM_031260.1 DB_XREF=gi:13994126 FEA=Mov101 FEA=FLmRNA CNT=18 TID=Mm.102985.1 TIER=FL+Slack STK=11 UG=Mm.102985.1 LL=83456 DEF=Mus musculus Moloney leukemia virus 10-like 1 (Mov10), mRNA. /PROD=Moloney leukemia virus 10-like 1 FL-gb AF285587.1 gb AF340211.1 gb NM_031260.1                                                                                                                                                                                                                                                                                                                                                     | 3885.3    | 658.83813 | 2512.8667 | 787.5243  | 2.3151417 | 3.0 | 0.10354287  | 0.27189314 | 0.65 | 1.55 | gb NM_019652.1 DB_XREF=gi:12025541 GEN=Anaf1 FEA=FLmRNA CNT=69 TID=Mm.41475.1 TIER=FL+Slack STK=26 UG=Mm.41475.1 LL=56495 DEF=Mus musculus ara (bacterial) anisole transporter, ATP-binding, homolog 1 (Anaf1), mRNA. /PROD=ara (bacterial) anisole transporter ATP-binding, homolog 1 FL-gb AF039405.2 gb NM_019652.1 gb BC016453.1 gb BC018430.1 gb NM_133777.1 DB_XREF=gi:19527003 GEN=BT2046SF12Rk FEA=FLmRNA CNT=180 TID=Mm.22491.1 TIER=FL+Slack STK=71 UG=Mm.22491.1 LL=77891 DEF=Mus mus                                                                                                                                       |           |           |           |           |           |     |             |            |      |      |                                                                                                                                                                                                                                                                                                                                                                                                                                                                                                                                                                                                                                        |           |           |           |           |           |     |             |            |      |      |                                                                                                                                                                                                                                                                                                                                                                                                                                                                                                                                                                                                                                        |           |           |           |           |           |     |             |            |      |      |                                                                                                                                                                                                                                                                                                                                                                                                                                                                                                                                                                                                                                        |           |           |           |           |           |     |             |            |      |      |                                                                                                                                                                                                                                                                                                                                                                                                                                                                                                                                                                                                                                        |           |           |           |           |           |     |             |            |      |      |                                                                                                                                                                                                                                                                                                                                                                                                                                                                                                                                                                                                                                        |           |           |           |           |           |     |             |            |      |      |                                                                                                                                                                                                                                                                                                                                                                                                                                                                                                  |           |           |           |           |           |     |             |            |      |      |                                                                                                                                                                                                                                                                                                                                                                                                                                                                                                  |           |           |           |           |           |     |             |            |      |      |                                                                                                                                                                                                                                                                                                                                                                                                                                                                                                  |          |           |           |           |           |     |             |            |      |      |                                                                                                                                                                                                                                                                                                                                                                                                                                                                                                  |        |           |           |          |           |     |            |            |      |      |                                                                                                                                                                                                                                                                                                                                                                                                                                                                                                  |
| gb BM196939 DB_XREF=gi:17748959 DB_XREF=0304006.3 CLONE=0304006.3 FEA=mRNA CNT=57 TID=Mm.220848.1 TIER=Slack STK=16 UG=Mm.220848 UG_TITLE=Slack DEF=Mus musculus, similar to putative, clone MGC:5345087, mRNA, partial cds. /PROD=Slack FL-gb NM_0207247.1 gb AF128192.1 gb AF128191.1 gb MS8004.1 gb BC002073.1 gb AF128190.1 gb AF128189.1 gb AF128188.1                                                                                                                                                                                                                                                                                               | 366.83334  | 48.94613  | 229.76666 | 88.11454  | 2.355309  | 3.0 | 0.09982363  | 0.27395207 | 0.63 | 1.6  | gb NM_023631.1 DB_XREF=gi:12072471 FEA=FLmRNA CNT=119 TID=Mm.21897.1 TIER=FL+Slack STK=30 UG=Mm.21897.1 LL=11923 UG_GENE=Cn2-pending UG_TITLE=RIKEN cDNA Z1310039H17 gene (DEF=Mus musculus ES cells cDNA, RIKEN full-length enriched library, clone:2410043M02.gtg) assembly stacking protein 2, full insert sequence.                                                                                                                                                                                                                                                                                                                                   | 687.3     | 287.4756  | 202.13335 | 12.589808 | 2.9203472 | 2.0 | 0.09997883  | 0.2723304  | 0.29 | 3.4  | gb BC003744.1 DB_XREF=gi:13277677 FEA=FLmRNA CNT=135 TID=Mm.3234.1 TIER=FL+Slack STK=52 UG=Mm.3234.1 LL=19060 UG_GENE=Pp2b DEF=Mus musculus, protein phosphatase 5, catalytic subunit, clone MGC:5847 IMAGE:3599302, mRNA, complete cds. /PROD=protein phosphatase 5, catalytic subunit FL-gb U25809.1 gb BC001468.1 gb BC001864.1 DB_XREF=gi:1284269 FEA=FLmRNA CNT=29 TID=Mm.23836.1 TIER=Slack STK=23 UG=Mm.23836.1 LL=70231 UG_GENE=Cn2-pending UG_TITLE=RIKEN cDNA Z1310039H17 gene (DEF=Mus musculus ES cells cDNA, RIKEN full-length enriched library, clone:2410043M02.gtg) assembly stacking protein 2, full insert sequence.                    | 1420.2334 | 425.87183 | 649.23334 | 171.36757 | 2.9095585 | 2.0 | 0.10061329  | 0.27202854 | 0.46 | 2.19 | gb NM_130880.1 DB_XREF=gi:18698997 GEN=Cdk9 FEA=FLmRNA CNT=119 TID=Mm.27557.1 TIER=FL+Slack STK=50 UG=Mm.27557.1 LL=107951 DEF=Mus musculus cyclin-dependent kinase 9 (CDC-related kinase) (Cdk9), mRNA. /PROD=cyclin-dependent kinase 9 FL-gb AF327431.1 gb BC003901.1 gb NM_130860.1                                                                                                                                                                                                                                                                                                                                                 | 513.26666 | 108.13493 | 311.26666 | 103.22113 | 2.340426  | 3.0 | 0.1011825   | 0.271556   | 0.61 | 1.65 | gb NM_010742.1 DB_XREF=gi:7940177 GEN=Cdc37 FEA=FLmRNA CNT=193 TID=Mm.4117.1 TIER=FL+Slack STK=68 UG=Mm.4117.1 LL=12536 UG_GENE=Cdc37 DEF=Mus musculus cyclin division cycle 37 homolog (S. cerevisiae) (Cdc37), mRNA. /PROD=cyclin division cycle 37 homolog (S. cerevisiae) FL-gb U43076.1 gb NM_016742.1                                                                                                                                                                                                                                                                                                                            | 5240.6997 | 1181.1212 | 3308.3665 | 816.72766 | 2.3307126 | 3.0 | 0.10208148  | 0.2719689  | 0.63 | 1.58 | gb BC002148.1 DB_XREF=gi:12805356 FEA=FLmRNA CNT=59 TID=Mm.582.2 TIER=FL+Slack STK=49 UG=Mm.582.1 LL=11770 UG_GENE=fbp4 DEF=Mus musculus, clone MGC:7265 IMAGE:3484864, mRNA, complete cds. /PROD=Unknown (protein for MGC:7265) FL-gb BC002148.1                                                                                                                                                                                                                                                                                                                                                                                      | 610.1333  | 54.303703 | 384.66666 | 124.90342 | 2.8673048 | 2.0 | 0.103153974 | 0.27283478 | 0.63 | 1.59 | gb NM_031260.1 DB_XREF=gi:13994126 FEA=Mov101 FEA=FLmRNA CNT=18 TID=Mm.102985.1 TIER=FL+Slack STK=11 UG=Mm.102985.1 LL=83456 DEF=Mus musculus Moloney leukemia virus 10-like 1 (Mov10), mRNA. /PROD=Moloney leukemia virus 10-like 1 FL-gb AF285587.1 gb AF340211.1 gb NM_031260.1                                                                                                                                                                                                                                                                                                                                                     | 3885.3    | 658.83813 | 2512.8667 | 787.5243  | 2.3151417 | 3.0 | 0.10354287  | 0.27189314 | 0.65 | 1.55 | gb NM_019652.1 DB_XREF=gi:12025541 GEN=Anaf1 FEA=FLmRNA CNT=69 TID=Mm.41475.1 TIER=FL+Slack STK=26 UG=Mm.41475.1 LL=56495 DEF=Mus musculus ara (bacterial) anisole transporter, ATP-binding, homolog 1 (Anaf1), mRNA. /PROD=ara (bacterial) anisole transporter ATP-binding, homolog 1 FL-gb AF039405.2 gb NM_019652.1 gb BC016453.1 gb BC018430.1 gb NM_133777.1 DB_XREF=gi:19527003 GEN=BT2046SF12Rk FEA=FLmRNA CNT=180 TID=Mm.22491.1 TIER=FL+Slack STK=71 UG=Mm.22491.1 LL=77891 DEF=Mus mus                                                                                                                                       |           |           |           |           |           |     |             |            |      |      |                                                                                                                                                                                                                                                                                                                                                                                                                                                                                                                                                                                                                                        |           |           |           |           |           |     |             |            |      |      |                                                                                                                                                                                                                                                                                                                                                                                                                                                                                                                                                                                                                                        |           |           |           |           |           |     |             |            |      |      |                                                                                                                                                                                                                                                                                                                                                                                                                                                                                                                                                                                                                                        |           |           |           |           |           |     |             |            |      |      |                                                                                                                                                                                                                                                                                                                                                                                                                                                                                                                                                                                                                                        |           |           |           |           |           |     |             |            |      |      |                                                                                                                                                                                                                                                                                                                                                                                                                                                                                                                                                                                                                                        |           |           |           |           |           |     |             |            |      |      |                                                                                                                                                                                                                                                                                                                                                                                                                                                                                                                                                                                                                                        |           |           |           |           |           |     |             |            |      |      |                                                                                                                                                                                                                                                                                                                                                                                                                                                                                                  |           |           |           |           |           |     |             |            |      |      |                                                                                                                                                                                                                                                                                                                                                                                                                                                                                                  |           |           |           |           |           |     |             |            |      |      |                                                                                                                                                                                                                                                                                                                                                                                                                                                                                                  |          |           |           |           |           |     |             |            |      |      |                                                                                                                                                                                                                                                                                                                                                                                                                                                                                                  |        |           |           |          |           |     |            |            |      |      |                                                                                                                                                                                                                                                                                                                                                                                                                                                                                                  |
| gb NM_023631.1 DB_XREF=gi:12072471 FEA=FLmRNA CNT=119 TID=Mm.21897.1 TIER=FL+Slack STK=30 UG=Mm.21897.1 LL=11923 UG_GENE=Cn2-pending UG_TITLE=RIKEN cDNA Z1310039H17 gene (DEF=Mus musculus ES cells cDNA, RIKEN full-length enriched library, clone:2410043M02.gtg) assembly stacking protein 2, full insert sequence.                                                                                                                                                                                                                                                                                                                                   | 687.3      | 287.4756  | 202.13335 | 12.589808 | 2.9203472 | 2.0 | 0.09997883  | 0.2723304  | 0.29 | 3.4  | gb BC003744.1 DB_XREF=gi:13277677 FEA=FLmRNA CNT=135 TID=Mm.3234.1 TIER=FL+Slack STK=52 UG=Mm.3234.1 LL=19060 UG_GENE=Pp2b DEF=Mus musculus, protein phosphatase 5, catalytic subunit, clone MGC:5847 IMAGE:3599302, mRNA, complete cds. /PROD=protein phosphatase 5, catalytic subunit FL-gb U25809.1 gb BC001468.1 gb BC001864.1 DB_XREF=gi:1284269 FEA=FLmRNA CNT=29 TID=Mm.23836.1 TIER=Slack STK=23 UG=Mm.23836.1 LL=70231 UG_GENE=Cn2-pending UG_TITLE=RIKEN cDNA Z1310039H17 gene (DEF=Mus musculus ES cells cDNA, RIKEN full-length enriched library, clone:2410043M02.gtg) assembly stacking protein 2, full insert sequence.                    | 1420.2334 | 425.87183 | 649.23334 | 171.36757 | 2.9095585 | 2.0 | 0.10061329  | 0.27202854 | 0.46 | 2.19 | gb NM_130880.1 DB_XREF=gi:18698997 GEN=Cdk9 FEA=FLmRNA CNT=119 TID=Mm.27557.1 TIER=FL+Slack STK=50 UG=Mm.27557.1 LL=107951 DEF=Mus musculus cyclin-dependent kinase 9 (CDC-related kinase) (Cdk9), mRNA. /PROD=cyclin-dependent kinase 9 FL-gb AF327431.1 gb BC003901.1 gb NM_130860.1                                                                                                                                                                                                                                                                                                                                                                    | 513.26666 | 108.13493 | 311.26666 | 103.22113 | 2.340426  | 3.0 | 0.1011825   | 0.271556   | 0.61 | 1.65 | gb NM_010742.1 DB_XREF=gi:7940177 GEN=Cdc37 FEA=FLmRNA CNT=193 TID=Mm.4117.1 TIER=FL+Slack STK=68 UG=Mm.4117.1 LL=12536 UG_GENE=Cdc37 DEF=Mus musculus cyclin division cycle 37 homolog (S. cerevisiae) (Cdc37), mRNA. /PROD=cyclin division cycle 37 homolog (S. cerevisiae) FL-gb U43076.1 gb NM_016742.1                                                                                                                                                                                                                                                                                                                            | 5240.6997 | 1181.1212 | 3308.3665 | 816.72766 | 2.3307126 | 3.0 | 0.10208148  | 0.2719689  | 0.63 | 1.58 | gb BC002148.1 DB_XREF=gi:12805356 FEA=FLmRNA CNT=59 TID=Mm.582.2 TIER=FL+Slack STK=49 UG=Mm.582.1 LL=11770 UG_GENE=fbp4 DEF=Mus musculus, clone MGC:7265 IMAGE:3484864, mRNA, complete cds. /PROD=Unknown (protein for MGC:7265) FL-gb BC002148.1                                                                                                                                                                                                                                                                                                                                                                                      | 610.1333  | 54.303703 | 384.66666 | 124.90342 | 2.8673048 | 2.0 | 0.103153974 | 0.27283478 | 0.63 | 1.59 | gb NM_031260.1 DB_XREF=gi:13994126 FEA=Mov101 FEA=FLmRNA CNT=18 TID=Mm.102985.1 TIER=FL+Slack STK=11 UG=Mm.102985.1 LL=83456 DEF=Mus musculus Moloney leukemia virus 10-like 1 (Mov10), mRNA. /PROD=Moloney leukemia virus 10-like 1 FL-gb AF285587.1 gb AF340211.1 gb NM_031260.1                                                                                                                                                                                                                                                                                                                                                     | 3885.3    | 658.83813 | 2512.8667 | 787.5243  | 2.3151417 | 3.0 | 0.10354287  | 0.27189314 | 0.65 | 1.55 | gb NM_019652.1 DB_XREF=gi:12025541 GEN=Anaf1 FEA=FLmRNA CNT=69 TID=Mm.41475.1 TIER=FL+Slack STK=26 UG=Mm.41475.1 LL=56495 DEF=Mus musculus ara (bacterial) anisole transporter, ATP-binding, homolog 1 (Anaf1), mRNA. /PROD=ara (bacterial) anisole transporter ATP-binding, homolog 1 FL-gb AF039405.2 gb NM_019652.1 gb BC016453.1 gb BC018430.1 gb NM_133777.1 DB_XREF=gi:19527003 GEN=BT2046SF12Rk FEA=FLmRNA CNT=180 TID=Mm.22491.1 TIER=FL+Slack STK=71 UG=Mm.22491.1 LL=77891 DEF=Mus mus                                                                                                                                       |           |           |           |           |           |     |             |            |      |      |                                                                                                                                                                                                                                                                                                                                                                                                                                                                                                                                                                                                                                        |           |           |           |           |           |     |             |            |      |      |                                                                                                                                                                                                                                                                                                                                                                                                                                                                                                                                                                                                                                        |           |           |           |           |           |     |             |            |      |      |                                                                                                                                                                                                                                                                                                                                                                                                                                                                                                                                                                                                                                        |           |           |           |           |           |     |             |            |      |      |                                                                                                                                                                                                                                                                                                                                                                                                                                                                                                                                                                                                                                        |           |           |           |           |           |     |             |            |      |      |                                                                                                                                                                                                                                                                                                                                                                                                                                                                                                                                                                                                                                        |           |           |           |           |           |     |             |            |      |      |                                                                                                                                                                                                                                                                                                                                                                                                                                                                                                                                                                                                                                        |           |           |           |           |           |     |             |            |      |      |                                                                                                                                                                                                                                                                                                                                                                                                                                                                                                                                                                                                                                        |           |           |           |           |           |     |             |            |      |      |                                                                                                                                                                                                                                                                                                                                                                                                                                                                                                  |           |           |           |           |           |     |             |            |      |      |                                                                                                                                                                                                                                                                                                                                                                                                                                                                                                  |           |           |           |           |           |     |             |            |      |      |                                                                                                                                                                                                                                                                                                                                                                                                                                                                                                  |          |           |           |           |           |     |             |            |      |      |                                                                                                                                                                                                                                                                                                                                                                                                                                                                                                  |        |           |           |          |           |     |            |            |      |      |                                                                                                                                                                                                                                                                                                                                                                                                                                                                                                  |
| gb BC003744.1 DB_XREF=gi:13277677 FEA=FLmRNA CNT=135 TID=Mm.3234.1 TIER=FL+Slack STK=52 UG=Mm.3234.1 LL=19060 UG_GENE=Pp2b DEF=Mus musculus, protein phosphatase 5, catalytic subunit, clone MGC:5847 IMAGE:3599302, mRNA, complete cds. /PROD=protein phosphatase 5, catalytic subunit FL-gb U25809.1 gb BC001468.1 gb BC001864.1 DB_XREF=gi:1284269 FEA=FLmRNA CNT=29 TID=Mm.23836.1 TIER=Slack STK=23 UG=Mm.23836.1 LL=70231 UG_GENE=Cn2-pending UG_TITLE=RIKEN cDNA Z1310039H17 gene (DEF=Mus musculus ES cells cDNA, RIKEN full-length enriched library, clone:2410043M02.gtg) assembly stacking protein 2, full insert sequence.                    | 1420.2334  | 425.87183 | 649.23334 | 171.36757 | 2.9095585 | 2.0 | 0.10061329  | 0.27202854 | 0.46 | 2.19 | gb NM_130880.1 DB_XREF=gi:18698997 GEN=Cdk9 FEA=FLmRNA CNT=119 TID=Mm.27557.1 TIER=FL+Slack STK=50 UG=Mm.27557.1 LL=107951 DEF=Mus musculus cyclin-dependent kinase 9 (CDC-related kinase) (Cdk9), mRNA. /PROD=cyclin-dependent kinase 9 FL-gb AF327431.1 gb BC003901.1 gb NM_130860.1                                                                                                                                                                                                                                                                                                                                                                    | 513.26666 | 108.13493 | 311.26666 | 103.22113 | 2.340426  | 3.0 | 0.1011825   | 0.271556   | 0.61 | 1.65 | gb NM_010742.1 DB_XREF=gi:7940177 GEN=Cdc37 FEA=FLmRNA CNT=193 TID=Mm.4117.1 TIER=FL+Slack STK=68 UG=Mm.4117.1 LL=12536 UG_GENE=Cdc37 DEF=Mus musculus cyclin division cycle 37 homolog (S. cerevisiae) (Cdc37), mRNA. /PROD=cyclin division cycle 37 homolog (S. cerevisiae) FL-gb U43076.1 gb NM_016742.1                                                                                                                                                                                                                                                                                                                                               | 5240.6997 | 1181.1212 | 3308.3665 | 816.72766 | 2.3307126 | 3.0 | 0.10208148  | 0.2719689  | 0.63 | 1.58 | gb BC002148.1 DB_XREF=gi:12805356 FEA=FLmRNA CNT=59 TID=Mm.582.2 TIER=FL+Slack STK=49 UG=Mm.582.1 LL=11770 UG_GENE=fbp4 DEF=Mus musculus, clone MGC:7265 IMAGE:3484864, mRNA, complete cds. /PROD=Unknown (protein for MGC:7265) FL-gb BC002148.1                                                                                                                                                                                                                                                                                                                                                                                      | 610.1333  | 54.303703 | 384.66666 | 124.90342 | 2.8673048 | 2.0 | 0.103153974 | 0.27283478 | 0.63 | 1.59 | gb NM_031260.1 DB_XREF=gi:13994126 FEA=Mov101 FEA=FLmRNA CNT=18 TID=Mm.102985.1 TIER=FL+Slack STK=11 UG=Mm.102985.1 LL=83456 DEF=Mus musculus Moloney leukemia virus 10-like 1 (Mov10), mRNA. /PROD=Moloney leukemia virus 10-like 1 FL-gb AF285587.1 gb AF340211.1 gb NM_031260.1                                                                                                                                                                                                                                                                                                                                                     | 3885.3    | 658.83813 | 2512.8667 | 787.5243  | 2.3151417 | 3.0 | 0.10354287  | 0.27189314 | 0.65 | 1.55 | gb NM_019652.1 DB_XREF=gi:12025541 GEN=Anaf1 FEA=FLmRNA CNT=69 TID=Mm.41475.1 TIER=FL+Slack STK=26 UG=Mm.41475.1 LL=56495 DEF=Mus musculus ara (bacterial) anisole transporter, ATP-binding, homolog 1 (Anaf1), mRNA. /PROD=ara (bacterial) anisole transporter ATP-binding, homolog 1 FL-gb AF039405.2 gb NM_019652.1 gb BC016453.1 gb BC018430.1 gb NM_133777.1 DB_XREF=gi:19527003 GEN=BT2046SF12Rk FEA=FLmRNA CNT=180 TID=Mm.22491.1 TIER=FL+Slack STK=71 UG=Mm.22491.1 LL=77891 DEF=Mus mus                                                                                                                                       |           |           |           |           |           |     |             |            |      |      |                                                                                                                                                                                                                                                                                                                                                                                                                                                                                                                                                                                                                                        |           |           |           |           |           |     |             |            |      |      |                                                                                                                                                                                                                                                                                                                                                                                                                                                                                                                                                                                                                                        |           |           |           |           |           |     |             |            |      |      |                                                                                                                                                                                                                                                                                                                                                                                                                                                                                                                                                                                                                                        |           |           |           |           |           |     |             |            |      |      |                                                                                                                                                                                                                                                                                                                                                                                                                                                                                                                                                                                                                                        |           |           |           |           |           |     |             |            |      |      |                                                                                                                                                                                                                                                                                                                                                                                                                                                                                                                                                                                                                                        |           |           |           |           |           |     |             |            |      |      |                                                                                                                                                                                                                                                                                                                                                                                                                                                                                                                                                                                                                                        |           |           |           |           |           |     |             |            |      |      |                                                                                                                                                                                                                                                                                                                                                                                                                                                                                                                                                                                                                                        |           |           |           |           |           |     |             |            |      |      |                                                                                                                                                                                                                                                                                                                                                                                                                                                                                                                                                                                                                                        |           |           |           |           |           |     |             |            |      |      |                                                                                                                                                                                                                                                                                                                                                                                                                                                                                                  |           |           |           |           |           |     |             |            |      |      |                                                                                                                                                                                                                                                                                                                                                                                                                                                                                                  |           |           |           |           |           |     |             |            |      |      |                                                                                                                                                                                                                                                                                                                                                                                                                                                                                                  |          |           |           |           |           |     |             |            |      |      |                                                                                                                                                                                                                                                                                                                                                                                                                                                                                                  |        |           |           |          |           |     |            |            |      |      |                                                                                                                                                                                                                                                                                                                                                                                                                                                                                                  |
| gb NM_130880.1 DB_XREF=gi:18698997 GEN=Cdk9 FEA=FLmRNA CNT=119 TID=Mm.27557.1 TIER=FL+Slack STK=50 UG=Mm.27557.1 LL=107951 DEF=Mus musculus cyclin-dependent kinase 9 (CDC-related kinase) (Cdk9), mRNA. /PROD=cyclin-dependent kinase 9 FL-gb AF327431.1 gb BC003901.1 gb NM_130860.1                                                                                                                                                                                                                                                                                                                                                                    | 513.26666  | 108.13493 | 311.26666 | 103.22113 | 2.340426  | 3.0 | 0.1011825   | 0.271556   | 0.61 | 1.65 | gb NM_010742.1 DB_XREF=gi:7940177 GEN=Cdc37 FEA=FLmRNA CNT=193 TID=Mm.4117.1 TIER=FL+Slack STK=68 UG=Mm.4117.1 LL=12536 UG_GENE=Cdc37 DEF=Mus musculus cyclin division cycle 37 homolog (S. cerevisiae) (Cdc37), mRNA. /PROD=cyclin division cycle 37 homolog (S. cerevisiae) FL-gb U43076.1 gb NM_016742.1                                                                                                                                                                                                                                                                                                                                               | 5240.6997 | 1181.1212 | 3308.3665 | 816.72766 | 2.3307126 | 3.0 | 0.10208148  | 0.2719689  | 0.63 | 1.58 | gb BC002148.1 DB_XREF=gi:12805356 FEA=FLmRNA CNT=59 TID=Mm.582.2 TIER=FL+Slack STK=49 UG=Mm.582.1 LL=11770 UG_GENE=fbp4 DEF=Mus musculus, clone MGC:7265 IMAGE:3484864, mRNA, complete cds. /PROD=Unknown (protein for MGC:7265) FL-gb BC002148.1                                                                                                                                                                                                                                                                                                                                                                                                         | 610.1333  | 54.303703 | 384.66666 | 124.90342 | 2.8673048 | 2.0 | 0.103153974 | 0.27283478 | 0.63 | 1.59 | gb NM_031260.1 DB_XREF=gi:13994126 FEA=Mov101 FEA=FLmRNA CNT=18 TID=Mm.102985.1 TIER=FL+Slack STK=11 UG=Mm.102985.1 LL=83456 DEF=Mus musculus Moloney leukemia virus 10-like 1 (Mov10), mRNA. /PROD=Moloney leukemia virus 10-like 1 FL-gb AF285587.1 gb AF340211.1 gb NM_031260.1                                                                                                                                                                                                                                                                                                                                                     | 3885.3    | 658.83813 | 2512.8667 | 787.5243  | 2.3151417 | 3.0 | 0.10354287  | 0.27189314 | 0.65 | 1.55 | gb NM_019652.1 DB_XREF=gi:12025541 GEN=Anaf1 FEA=FLmRNA CNT=69 TID=Mm.41475.1 TIER=FL+Slack STK=26 UG=Mm.41475.1 LL=56495 DEF=Mus musculus ara (bacterial) anisole transporter, ATP-binding, homolog 1 (Anaf1), mRNA. /PROD=ara (bacterial) anisole transporter ATP-binding, homolog 1 FL-gb AF039405.2 gb NM_019652.1 gb BC016453.1 gb BC018430.1 gb NM_133777.1 DB_XREF=gi:19527003 GEN=BT2046SF12Rk FEA=FLmRNA CNT=180 TID=Mm.22491.1 TIER=FL+Slack STK=71 UG=Mm.22491.1 LL=77891 DEF=Mus mus                                                                                                                                       |           |           |           |           |           |     |             |            |      |      |                                                                                                                                                                                                                                                                                                                                                                                                                                                                                                                                                                                                                                        |           |           |           |           |           |     |             |            |      |      |                                                                                                                                                                                                                                                                                                                                                                                                                                                                                                                                                                                                                                        |           |           |           |           |           |     |             |            |      |      |                                                                                                                                                                                                                                                                                                                                                                                                                                                                                                                                                                                                                                        |           |           |           |           |           |     |             |            |      |      |                                                                                                                                                                                                                                                                                                                                                                                                                                                                                                                                                                                                                                        |           |           |           |           |           |     |             |            |      |      |                                                                                                                                                                                                                                                                                                                                                                                                                                                                                                                                                                                                                                        |           |           |           |           |           |     |             |            |      |      |                                                                                                                                                                                                                                                                                                                                                                                                                                                                                                                                                                                                                                        |           |           |           |           |           |     |             |            |      |      |                                                                                                                                                                                                                                                                                                                                                                                                                                                                                                                                                                                                                                        |           |           |           |           |           |     |             |            |      |      |                                                                                                                                                                                                                                                                                                                                                                                                                                                                                                                                                                                                                                        |           |           |           |           |           |     |             |            |      |      |                                                                                                                                                                                                                                                                                                                                                                                                                                                                                                                                                                                                                                        |           |           |           |           |           |     |             |            |      |      |                                                                                                                                                                                                                                                                                                                                                                                                                                                                                                  |           |           |           |           |           |     |             |            |      |      |                                                                                                                                                                                                                                                                                                                                                                                                                                                                                                  |           |           |           |           |           |     |             |            |      |      |                                                                                                                                                                                                                                                                                                                                                                                                                                                                                                  |          |           |           |           |           |     |             |            |      |      |                                                                                                                                                                                                                                                                                                                                                                                                                                                                                                  |        |           |           |          |           |     |            |            |      |      |                                                                                                                                                                                                                                                                                                                                                                                                                                                                                                  |
| gb NM_010742.1 DB_XREF=gi:7940177 GEN=Cdc37 FEA=FLmRNA CNT=193 TID=Mm.4117.1 TIER=FL+Slack STK=68 UG=Mm.4117.1 LL=12536 UG_GENE=Cdc37 DEF=Mus musculus cyclin division cycle 37 homolog (S. cerevisiae) (Cdc37), mRNA. /PROD=cyclin division cycle 37 homolog (S. cerevisiae) FL-gb U43076.1 gb NM_016742.1                                                                                                                                                                                                                                                                                                                                               | 5240.6997  | 1181.1212 | 3308.3665 | 816.72766 | 2.3307126 | 3.0 | 0.10208148  | 0.2719689  | 0.63 | 1.58 | gb BC002148.1 DB_XREF=gi:12805356 FEA=FLmRNA CNT=59 TID=Mm.582.2 TIER=FL+Slack STK=49 UG=Mm.582.1 LL=11770 UG_GENE=fbp4 DEF=Mus musculus, clone MGC:7265 IMAGE:3484864, mRNA, complete cds. /PROD=Unknown (protein for MGC:7265) FL-gb BC002148.1                                                                                                                                                                                                                                                                                                                                                                                                         | 610.1333  | 54.303703 | 384.66666 | 124.90342 | 2.8673048 | 2.0 | 0.103153974 | 0.27283478 | 0.63 | 1.59 | gb NM_031260.1 DB_XREF=gi:13994126 FEA=Mov101 FEA=FLmRNA CNT=18 TID=Mm.102985.1 TIER=FL+Slack STK=11 UG=Mm.102985.1 LL=83456 DEF=Mus musculus Moloney leukemia virus 10-like 1 (Mov10), mRNA. /PROD=Moloney leukemia virus 10-like 1 FL-gb AF285587.1 gb AF340211.1 gb NM_031260.1                                                                                                                                                                                                                                                                                                                                                                        | 3885.3    | 658.83813 | 2512.8667 | 787.5243  | 2.3151417 | 3.0 | 0.10354287  | 0.27189314 | 0.65 | 1.55 | gb NM_019652.1 DB_XREF=gi:12025541 GEN=Anaf1 FEA=FLmRNA CNT=69 TID=Mm.41475.1 TIER=FL+Slack STK=26 UG=Mm.41475.1 LL=56495 DEF=Mus musculus ara (bacterial) anisole transporter, ATP-binding, homolog 1 (Anaf1), mRNA. /PROD=ara (bacterial) anisole transporter ATP-binding, homolog 1 FL-gb AF039405.2 gb NM_019652.1 gb BC016453.1 gb BC018430.1 gb NM_133777.1 DB_XREF=gi:19527003 GEN=BT2046SF12Rk FEA=FLmRNA CNT=180 TID=Mm.22491.1 TIER=FL+Slack STK=71 UG=Mm.22491.1 LL=77891 DEF=Mus mus                                                                                                                                       |           |           |           |           |           |     |             |            |      |      |                                                                                                                                                                                                                                                                                                                                                                                                                                                                                                                                                                                                                                        |           |           |           |           |           |     |             |            |      |      |                                                                                                                                                                                                                                                                                                                                                                                                                                                                                                                                                                                                                                        |           |           |           |           |           |     |             |            |      |      |                                                                                                                                                                                                                                                                                                                                                                                                                                                                                                                                                                                                                                        |           |           |           |           |           |     |             |            |      |      |                                                                                                                                                                                                                                                                                                                                                                                                                                                                                                                                                                                                                                        |           |           |           |           |           |     |             |            |      |      |                                                                                                                                                                                                                                                                                                                                                                                                                                                                                                                                                                                                                                        |           |           |           |           |           |     |             |            |      |      |                                                                                                                                                                                                                                                                                                                                                                                                                                                                                                                                                                                                                                        |           |           |           |           |           |     |             |            |      |      |                                                                                                                                                                                                                                                                                                                                                                                                                                                                                                                                                                                                                                        |           |           |           |           |           |     |             |            |      |      |                                                                                                                                                                                                                                                                                                                                                                                                                                                                                                                                                                                                                                        |           |           |           |           |           |     |             |            |      |      |                                                                                                                                                                                                                                                                                                                                                                                                                                                                                                                                                                                                                                        |           |           |           |           |           |     |             |            |      |      |                                                                                                                                                                                                                                                                                                                                                                                                                                                                                                                                                                                                                                        |           |           |           |           |           |     |             |            |      |      |                                                                                                                                                                                                                                                                                                                                                                                                                                                                                                  |           |           |           |           |           |     |             |            |      |      |                                                                                                                                                                                                                                                                                                                                                                                                                                                                                                  |           |           |           |           |           |     |             |            |      |      |                                                                                                                                                                                                                                                                                                                                                                                                                                                                                                  |          |           |           |           |           |     |             |            |      |      |                                                                                                                                                                                                                                                                                                                                                                                                                                                                                                  |        |           |           |          |           |     |            |            |      |      |                                                                                                                                                                                                                                                                                                                                                                                                                                                                                                  |
| gb BC002148.1 DB_XREF=gi:12805356 FEA=FLmRNA CNT=59 TID=Mm.582.2 TIER=FL+Slack STK=49 UG=Mm.582.1 LL=11770 UG_GENE=fbp4 DEF=Mus musculus, clone MGC:7265 IMAGE:3484864, mRNA, complete cds. /PROD=Unknown (protein for MGC:7265) FL-gb BC002148.1                                                                                                                                                                                                                                                                                                                                                                                                         | 610.1333   | 54.303703 | 384.66666 | 124.90342 | 2.8673048 | 2.0 | 0.103153974 | 0.27283478 | 0.63 | 1.59 | gb NM_031260.1 DB_XREF=gi:13994126 FEA=Mov101 FEA=FLmRNA CNT=18 TID=Mm.102985.1 TIER=FL+Slack STK=11 UG=Mm.102985.1 LL=83456 DEF=Mus musculus Moloney leukemia virus 10-like 1 (Mov10), mRNA. /PROD=Moloney leukemia virus 10-like 1 FL-gb AF285587.1 gb AF340211.1 gb NM_031260.1                                                                                                                                                                                                                                                                                                                                                                        | 3885.3    | 658.83813 | 2512.8667 | 787.5243  | 2.3151417 | 3.0 | 0.10354287  | 0.27189314 | 0.65 | 1.55 | gb NM_019652.1 DB_XREF=gi:12025541 GEN=Anaf1 FEA=FLmRNA CNT=69 TID=Mm.41475.1 TIER=FL+Slack STK=26 UG=Mm.41475.1 LL=56495 DEF=Mus musculus ara (bacterial) anisole transporter, ATP-binding, homolog 1 (Anaf1), mRNA. /PROD=ara (bacterial) anisole transporter ATP-binding, homolog 1 FL-gb AF039405.2 gb NM_019652.1 gb BC016453.1 gb BC018430.1 gb NM_133777.1 DB_XREF=gi:19527003 GEN=BT2046SF12Rk FEA=FLmRNA CNT=180 TID=Mm.22491.1 TIER=FL+Slack STK=71 UG=Mm.22491.1 LL=77891 DEF=Mus mus                                                                                                                                                          |           |           |           |           |           |     |             |            |      |      |                                                                                                                                                                                                                                                                                                                                                                                                                                                                                                                                                                                                                                        |           |           |           |           |           |     |             |            |      |      |                                                                                                                                                                                                                                                                                                                                                                                                                                                                                                                                                                                                                                        |           |           |           |           |           |     |             |            |      |      |                                                                                                                                                                                                                                                                                                                                                                                                                                                                                                                                                                                                                                        |           |           |           |           |           |     |             |            |      |      |                                                                                                                                                                                                                                                                                                                                                                                                                                                                                                                                                                                                                                        |           |           |           |           |           |     |             |            |      |      |                                                                                                                                                                                                                                                                                                                                                                                                                                                                                                                                                                                                                                        |           |           |           |           |           |     |             |            |      |      |                                                                                                                                                                                                                                                                                                                                                                                                                                                                                                                                                                                                                                        |           |           |           |           |           |     |             |            |      |      |                                                                                                                                                                                                                                                                                                                                                                                                                                                                                                                                                                                                                                        |           |           |           |           |           |     |             |            |      |      |                                                                                                                                                                                                                                                                                                                                                                                                                                                                                                                                                                                                                                        |           |           |           |           |           |     |             |            |      |      |                                                                                                                                                                                                                                                                                                                                                                                                                                                                                                                                                                                                                                        |           |           |           |           |           |     |             |            |      |      |                                                                                                                                                                                                                                                                                                                                                                                                                                                                                                                                                                                                                                        |           |           |           |           |           |     |             |            |      |      |                                                                                                                                                                                                                                                                                                                                                                                                                                                                                                                                                                                                                                        |           |           |           |           |           |     |             |            |      |      |                                                                                                                                                                                                                                                                                                                                                                                                                                                                                                  |           |           |           |           |           |     |             |            |      |      |                                                                                                                                                                                                                                                                                                                                                                                                                                                                                                  |           |           |           |           |           |     |             |            |      |      |                                                                                                                                                                                                                                                                                                                                                                                                                                                                                                  |          |           |           |           |           |     |             |            |      |      |                                                                                                                                                                                                                                                                                                                                                                                                                                                                                                  |        |           |           |          |           |     |            |            |      |      |                                                                                                                                                                                                                                                                                                                                                                                                                                                                                                  |
| gb NM_031260.1 DB_XREF=gi:13994126 FEA=Mov101 FEA=FLmRNA CNT=18 TID=Mm.102985.1 TIER=FL+Slack STK=11 UG=Mm.102985.1 LL=83456 DEF=Mus musculus Moloney leukemia virus 10-like 1 (Mov10), mRNA. /PROD=Moloney leukemia virus 10-like 1 FL-gb AF285587.1 gb AF340211.1 gb NM_031260.1                                                                                                                                                                                                                                                                                                                                                                        | 3885.3     | 658.83813 | 2512.8667 | 787.5243  | 2.3151417 | 3.0 | 0.10354287  | 0.27189314 | 0.65 | 1.55 | gb NM_019652.1 DB_XREF=gi:12025541 GEN=Anaf1 FEA=FLmRNA CNT=69 TID=Mm.41475.1 TIER=FL+Slack STK=26 UG=Mm.41475.1 LL=56495 DEF=Mus musculus ara (bacterial) anisole transporter, ATP-binding, homolog 1 (Anaf1), mRNA. /PROD=ara (bacterial) anisole transporter ATP-binding, homolog 1 FL-gb AF039405.2 gb NM_019652.1 gb BC016453.1 gb BC018430.1 gb NM_133777.1 DB_XREF=gi:19527003 GEN=BT2046SF12Rk FEA=FLmRNA CNT=180 TID=Mm.22491.1 TIER=FL+Slack STK=71 UG=Mm.22491.1 LL=77891 DEF=Mus mus                                                                                                                                                          |           |           |           |           |           |     |             |            |      |      |                                                                                                                                                                                                                                                                                                                                                                                                                                                                                                                                                                                                                                                           |           |           |           |           |           |     |             |            |      |      |                                                                                                                                                                                                                                                                                                                                                                                                                                                                                                                                                                                                                                        |           |           |           |           |           |     |             |            |      |      |                                                                                                                                                                                                                                                                                                                                                                                                                                                                                                                                                                                                                                        |           |           |           |           |           |     |             |            |      |      |                                                                                                                                                                                                                                                                                                                                                                                                                                                                                                                                                                                                                                        |           |           |           |           |           |     |             |            |      |      |                                                                                                                                                                                                                                                                                                                                                                                                                                                                                                                                                                                                                                        |           |           |           |           |           |     |             |            |      |      |                                                                                                                                                                                                                                                                                                                                                                                                                                                                                                                                                                                                                                        |           |           |           |           |           |     |             |            |      |      |                                                                                                                                                                                                                                                                                                                                                                                                                                                                                                                                                                                                                                        |           |           |           |           |           |     |             |            |      |      |                                                                                                                                                                                                                                                                                                                                                                                                                                                                                                                                                                                                                                        |           |           |           |           |           |     |             |            |      |      |                                                                                                                                                                                                                                                                                                                                                                                                                                                                                                                                                                                                                                        |           |           |           |           |           |     |             |            |      |      |                                                                                                                                                                                                                                                                                                                                                                                                                                                                                                                                                                                                                                        |           |           |           |           |           |     |             |            |      |      |                                                                                                                                                                                                                                                                                                                                                                                                                                                                                                                                                                                                                                        |           |           |           |           |           |     |             |            |      |      |                                                                                                                                                                                                                                                                                                                                                                                                                                                                                                                                                                                                                                        |           |           |           |           |           |     |             |            |      |      |                                                                                                                                                                                                                                                                                                                                                                                                                                                                                                  |           |           |           |           |           |     |             |            |      |      |                                                                                                                                                                                                                                                                                                                                                                                                                                                                                                  |           |           |           |           |           |     |             |            |      |      |                                                                                                                                                                                                                                                                                                                                                                                                                                                                                                  |          |           |           |           |           |     |             |            |      |      |                                                                                                                                                                                                                                                                                                                                                                                                                                                                                                  |        |           |           |          |           |     |            |            |      |      |                                                                                                                                                                                                                                                                                                                                                                                                                                                                                                  |
| gb NM_019652.1 DB_XREF=gi:12025541 GEN=Anaf1 FEA=FLmRNA CNT=69 TID=Mm.41475.1 TIER=FL+Slack STK=26 UG=Mm.41475.1 LL=56495 DEF=Mus musculus ara (bacterial) anisole transporter, ATP-binding, homolog 1 (Anaf1), mRNA. /PROD=ara (bacterial) anisole transporter ATP-binding, homolog 1 FL-gb AF039405.2 gb NM_019652.1 gb BC016453.1 gb BC018430.1 gb NM_133777.1 DB_XREF=gi:19527003 GEN=BT2046SF12Rk FEA=FLmRNA CNT=180 TID=Mm.22491.1 TIER=FL+Slack STK=71 UG=Mm.22491.1 LL=77891 DEF=Mus mus                                                                                                                                                          |            |           |           |           |           |     |             |            |      |      |                                                                                                                                                                                                                                                                                                                                                                                                                                                                                                                                                                                                                                                           |           |           |           |           |           |     |             |            |      |      |                                                                                                                                                                                                                                                                                                                                                                                                                                                                                                                                                                                                                                                           |           |           |           |           |           |     |             |            |      |      |                                                                                                                                                                                                                                                                                                                                                                                                                                                                                                                                                                                                                                        |           |           |           |           |           |     |             |            |      |      |                                                                                                                                                                                                                                                                                                                                                                                                                                                                                                                                                                                                                                        |           |           |           |           |           |     |             |            |      |      |                                                                                                                                                                                                                                                                                                                                                                                                                                                                                                                                                                                                                                        |           |           |           |           |           |     |             |            |      |      |                                                                                                                                                                                                                                                                                                                                                                                                                                                                                                                                                                                                                                        |           |           |           |           |           |     |             |            |      |      |                                                                                                                                                                                                                                                                                                                                                                                                                                                                                                                                                                                                                                        |           |           |           |           |           |     |             |            |      |      |                                                                                                                                                                                                                                                                                                                                                                                                                                                                                                                                                                                                                                        |           |           |           |           |           |     |             |            |      |      |                                                                                                                                                                                                                                                                                                                                                                                                                                                                                                                                                                                                                                        |           |           |           |           |           |     |             |            |      |      |                                                                                                                                                                                                                                                                                                                                                                                                                                                                                                                                                                                                                                        |           |           |           |           |           |     |             |            |      |      |                                                                                                                                                                                                                                                                                                                                                                                                                                                                                                                                                                                                                                        |           |           |           |           |           |     |             |            |      |      |                                                                                                                                                                                                                                                                                                                                                                                                                                                                                                                                                                                                                                        |           |           |           |           |           |     |             |            |      |      |                                                                                                                                                                                                                                                                                                                                                                                                                                                                                                                                                                                                                                        |           |           |           |           |           |     |             |            |      |      |                                                                                                                                                                                                                                                                                                                                                                                                                                                                                                  |           |           |           |           |           |     |             |            |      |      |                                                                                                                                                                                                                                                                                                                                                                                                                                                                                                  |           |           |           |           |           |     |             |            |      |      |                                                                                                                                                                                                                                                                                                                                                                                                                                                                                                  |          |           |           |           |           |     |             |            |      |      |                                                                                                                                                                                                                                                                                                                                                                                                                                                                                                  |        |           |           |          |           |     |            |            |      |      |                                                                                                                                                                                                                                                                                                                                                                                                                                                                                                  |



|                                                                                                                                                                                                                                                                                                                                                                                                                                                                                                                                                      |           |           |            |            |           |     |            |            |      |      |
|------------------------------------------------------------------------------------------------------------------------------------------------------------------------------------------------------------------------------------------------------------------------------------------------------------------------------------------------------------------------------------------------------------------------------------------------------------------------------------------------------------------------------------------------------|-----------|-----------|------------|------------|-----------|-----|------------|------------|------|------|
| gb:AK019396.1 /DB_XREF=gi:12859591 /FEA=mRNA /CNT=69 /TID=Mm.44226.2 /TIER=Stack /STK=39 /UG=Mm.44226 /LL=68066 /UG_GENE=3010027G13R/K /UG_TITLE=RIKEN cDNA 3010027G13 gene /DEF=Mus musculus 12 days embryo head cDNA, RIKEN full-length enriched library, clone 3010027G13.homolog to HYPOTHETICAL 38.5 KDA PROTEIN, full insert sequence.                                                                                                                                                                                                         | 1165.7667 | 342.06116 | 664.5      | 142.46161  | 2.3431087 | 2.0 | 0.14385577 | 0.2599374  | 0.57 | 1.75 |
| gb:NM_019722.1 /DB_XREF=gi:9878878 /GEN=Ariz /FEA=FLmRNA /CNT=74 /TID=Mm.21071.1 /TIER=FL+Stack /STK=39 /UG=Mm.21071 /LL=56327 /DEF=Mus musculus, Ariz-iboyastion-like 2 (Ariz), mRNA. /PROD=Ariz-iboyastion-like 2 (Ariz), cDNA, 019722.1 gb:AF143680                                                                                                                                                                                                                                                                                               | 1832.2001 | 534.95233 | 1139.4667  | 293.3553   | 1.9666193 | 3.0 | 0.14392015 | 0.2587727  | 0.62 | 1.61 |
| gb:NM_021443.1 /DB_XREF=gi:10846817 /GEN=ScybA /FEA=FLmRNA /CNT=15 /TID=Mm.42029.1 /TIER=FL+Stack /STK=7 /UG=Mm.42029 /LL=20307 /DEF=Mus musculus small inducible cytokine A8 (ScybA), mRNA. /PROD=small inducible cytokine A8 /FL=gb:AB023418.1 gb:NM_021443.1                                                                                                                                                                                                                                                                                      | 517.3     | 171.56436 | 271.66666  | 59.66963   | 2.3422065 | 2.0 | 0.14394383 | 0.25754657 | 0.53 | 1.9  |
| gb:NM_013602.1 /DB_XREF=gi:7305284 /GEN=MT /FEA=FLmRNA /CNT=145 /TID=Mm.219629.1 /TIER=FL+Stack /STK=36 /UG=Mm.219629 /LL=17448 /DEF=Mus musculus melanin-concentrating hormone 1 (M1), mRNA. /PROD=melanin-concentrating hormone 1 (M1), cDNA, 013602.1 gb:BCU26842.1 /DB_XREF=gi:20071854 /FEA=FLmRNA /CNT=89 /TID=Mm.20499.1 /TIER=FL+Stack /STK=49 /UG=Mm.20499 /DEF=Mus musculus, Similar to hypothetical protein FLJ20234, clone MGC:37525 IMAGE:4986113, mRNA, complete cds. /PROD=Similar to hypothetical protein FLJ20234 /FL=gb:BC026642.1 | 11612.833 | 3314.8948 | 7316.1665  | 1936.7217  | 1.9384388 | 3.0 | 0.14793773 | 0.26340133 | 0.63 | 1.59 |
| gb:U43884.1 /DB_XREF=gi:1247492 /GEN=IG1B /FEA=FLmRNA /CNT=3 /TID=Mm.444.2 /TIER=FL /STK=1 /UG=Mm.444 /LL=15901 /DEF=Mus musculus transcription factor IG1B (IG1B) mRNA, complete cds. /PROD=IG1B /FL=gb:U43884.1                                                                                                                                                                                                                                                                                                                                    | 1394.6    | 364.95178 | 889.7      | 273.0372   | 1.9186989 | 3.0 | 0.15083033 | 0.26595685 | 0.64 | 1.57 |
| gb:BC026751.1 /DB_XREF=gi:20071192 /FEA=FLmRNA /CNT=36 /TID=Mm.41486.1 /TIER=FL /STK=1 /UG=Mm.41486 /LL=70103 /UG_GENE=2700001K05R/K /DEF=Mus musculus, Similar to putative cyclin G1 interacting protein (FL=gb:BC026751.1) mRNA, complete cds. /PROD=Similar to putative cyclin G1 interacting protein (FL=gb:BC026751.1)                                                                                                                                                                                                                          | 1355.3667 | 312.11258 | 905.0999   | 262.02222  | 1.9137493 | 3.0 | 0.15156595 | 0.2659691  | 0.67 | 1.5  |
| gb:BC026751.1 /DB_XREF=gi:1933035 /FEA=FLmRNA /CNT=39 /TID=Mm.46628.2 /TIER=FL+Stack /STK=21 /UG=Mm.46628 /LL=22344 /UG_GENE=Vesf /DEF=Mus musculus, vascular endothelial zinc finger 1, clone MGC:29455 IMAGE:4159675, mRNA, complete cds. /PROD=vascular endothelial zinc finger 1 /FL=gb:BC024610.1                                                                                                                                                                                                                                               | 1260.9    | 340.7898  | 789.93335  | 122.7772   | 2.251978  | 2.0 | 0.15314065 | 0.26744658 | 0.63 | 1.6  |
| gb:AK01380.1 /DB_XREF=gi:12847432 /FEA=mRNA /CNT=64 /TID=Mm.142187.1 /TIER=Stack /STK=24 /UG=Mm.142187 /LL=89902 /UG_GENE=2610009E16R/K /UG_TITLE=RIKEN cDNA 2610009E16 gene /DEF=Mus musculus 10 days embryo whole body cDNA, RIKEN full-length enriched library, clone 2610009E16.homolog to PARATHYMOSIN (ZINC-BINDING 11.5 KDA PROTEIN), full insert sequence.                                                                                                                                                                                   | 3908.8    | 1215.2148 | 2384.5     | 673.47577  | 1.9002765 | 3.0 | 0.15358968 | 0.2669535  | 0.61 | 1.64 |
| gb:NM_009088.1 /DB_XREF=gi:6671792 /GEN=Rpo1.4 /FEA=FLmRNA /CNT=139 /TID=Mm.7387.1 /TIER=FL+Stack /STK=36 /UG=Mm.7387 /LL=20019 /DEF=Mus musculus RNA polymerase 1-4 (194 kDa subunit) (Rpo1.4), mRNA. /PROD=RNA polymerase 1-4 (194 kDa subunit) /FL=gb:NM_009088.1 gb:AF000938.1                                                                                                                                                                                                                                                                   | 442.7667  | 120.27112 | 271.9      | 99.23125   | 1.8980509 | 3.0 | 0.15392701 | 0.26627183 | 0.61 | 1.63 |
| gb:AK072897.1 /DB_XREF=gi:12840800 /GEN=Gapg1 /FEA=mRNA /CNT=2 /TID=Mm.2945.3 /TIER=ConsEnd /STK=1 /UG=Mm.2945 /LL=12345 /UG_TITLE=capping protein beta 1 /DEF=Mus musculus adult male testis cDNA, RIKEN full-length enriched library, clone 1700120C01.capping protein beta 1, full insert sequence.                                                                                                                                                                                                                                               | 3347.5    | 1118.8156 | 1890.4668  | 725.1011   | 1.892879  | 3.0 | 0.15471424 | 0.26637122 | 0.56 | 1.77 |
| gb:NM_017476.1 /DB_XREF=gi:8567377 /GEN=Nakap95-pending /FEA=FLmRNA /CNT=87 /TID=Mm.9590.1 /TIER=FL+Stack /STK=37 /UG=Mm.9590 /LL=54194 /DEF=Mus musculus neighbor of A-kinase anchoring protein 95 (Nakap95-pending), mRNA. /PROD=neighbor of A-kinase anchoring protein 95 (Nakap95-pending) /FL=gb:AB028921.1 /FL=gb:AB028921.1                                                                                                                                                                                                                   | 538.3333  | 148.90977 | 345.46664  | 20.051022  | 2.2232726 | 2.0 | 0.15623604 | 0.26772842 | 0.64 | 1.56 |
| gb:BC007140.1 /DB_XREF=gi:13938048 /FEA=FLmRNA /CNT=129 /TID=Mm.219663.2 /TIER=FL+Stack /STK=107 /UG=Mm.219663 /LL=14114 /UG_GENE=Fbln1 /DEF=Mus musculus, Similar to fibulin 1, clone MGC:6128 IMAGE:3495754, mRNA, complete cds. /PROD=Similar to fibulin 1 /FL=gb:BC007140.1                                                                                                                                                                                                                                                                      | 2261.4333 | 914.7857  | 1040.7667  | 275.78848  | 2.2128296 | 2.0 | 0.15738344 | 0.26843438 | 0.46 | 2.17 |
| gb:BE84258 /DB_XREF=gi:10856305 /DB_XREF=U01Mm.C0501bgd-c-01-U-31 /CLONE=U01Mm.C0501bgd-c-01-U /FEA=FLmRNA /CNT=16 /TID=Mm.22543.1 /TIER=Stack /STK=15 /UG=Mm.22543 /UG_TITLE=Mus musculus brain and reproductive organ-expressed protein (BrE) mRNA, complete cds /FL=gb:AF40752.1                                                                                                                                                                                                                                                                  | 915.3333  | 239.33093 | 607.63336  | 154.42604  | 1.8711394 | 3.0 | 0.15807502 | 0.2683559  | 0.66 | 1.51 |
| gb:NM_010312.1 /DB_XREF=gi:13937390 /GEN=Gnb2 /FEA=FLmRNA /CNT=367 /TID=Mm.30141.1 /TIER=FL+Stack /STK=141 /UG=Mm.30141 /LL=14693 /DEF=Mus musculus guanine nucleotide binding protein, beta 2 (Gnb2), mRNA. /PROD=guanine nucleotide-binding protein, beta-2subunit /FL=gb:U54560.1 gb:NM_010312.1                                                                                                                                                                                                                                                  | 1156.7001 | 482.16302 | 477.7333   | 227.77388  | 2.2053285 | 2.0 | 0.15821478 | 0.26735365 | 0.41 | 2.42 |
| gb:NM_011707.1 /DB_XREF=gi:13933353 /FEA=FLmRNA /CNT=47 /TID=Mm.34556.1 /TIER=FL+Stack /STK=16 /UG=Mm.34556 /LL=23831 /DEF=Mus musculus carbonic anhydrase 14 (Car14), mRNA. /PROD=carbonic anhydrase 14 /FL=gb:NM_011707.1 gb:AB005450.1                                                                                                                                                                                                                                                                                                            | 1273.2001 | 392.50107 | 750.2666   | 284.58118  | 1.8682411 | 3.0 | 0.15852948 | 0.26665094 | 0.59 | 1.7  |
| gb:AK040893.1 /DB_XREF=gi:12835132 /FEA=mRNA /CNT=542 /TID=Mm.29458.1 /TIER=Stack /STK=17 /UG=Mm.29458 /LL=68746 /UG_GENE=1110034G11R/K /UG_TITLE=RIKEN cDNA 1110034G11 gene /DEF=Mus musculus 18 days embryo whole body cDNA, RIKEN full-length enriched library, clone 1110034G11 related to CG12379 PROTEIN, full insert sequence.                                                                                                                                                                                                                | 2279.8    | 659.10315 | 1438.1333  | 63.327145  | 2.2016687 | 2.0 | 0.15862256 | 0.26558363 | 0.63 | 1.59 |
| gb:U18321.1 /DB_XREF=gi:1185384 /FEA=FLmRNA /CNT=80 /TID=Mm.4269.2 /TIER=FL+Stack /STK=55 /UG=Mm.4269 /LL=21413 /UG_GENE=Tcf4 /DEF=Mus musculus basic transcription factor MITF-2A mRNA, complete cds. /PROD=MITF-2A protein                                                                                                                                                                                                                                                                                                                         | 1709.9332 | 404.62988 | 1114.2999  | 333.23102  | 1.8674502 | 3.0 | 0.15865374 | 0.2644229  | 0.65 | 1.53 |
| gb:AK00892.1 /DB_XREF=gi:12842855 /FEA=mRNA /CNT=284 /TID=Mm.35719.1 /TIER=Stack /STK=41 /UG=Mm.35719 /LL=11552 /UG_GENE=1300004C11R/K /UG_TITLE=RIKEN cDNA 1300004C11 gene /DEF=Mus musculus adult male small intestine cDNA, RIKEN full-length enriched library, clone 2010319A12.homolog to THFIC2 SUBUNIT, full insert sequence.                                                                                                                                                                                                                 | 595.0     | 171.37785 | 374.63333  | 27.457663  | 2.1991158 | 2.0 | 0.15890788 | 0.2636426  | 0.63 | 1.59 |
| gb:AF252873.1 /DB_XREF=gi:7644395 /FEA=FLmRNA /CNT=73 /TID=Mm.30211.1 /TIER=FL /STK=5 /UG=Mm.30211 /LL=57286 /UG_GENE=Scyb14 /DEF=Mus musculus CXC chemokine MIP-2gamm precursor, mRNA, complete cds. /PROD=CXC chemokine MIP-2gamm precursor /FL=gb:AF192557.1 gb:NM_010568.1 gb:AF144754.1 gb:AF152377.1 gb:AF252873.1                                                                                                                                                                                                                             | 540.5     | 160.72278 | 317.30002  | 72.58843   | 2.1921403 | 2.0 | 0.15969104 | 0.2637431  | 0.59 | 1.7  |
| gb:AF332085.1 /DB_XREF=gi:14193736 /GEN=Rad21 /FEA=FLmRNA /CNT=282 /TID=Mm.182628.1 /TIER=FL+Stack /STK=2 /UG=Mm.182628 /LL=19357 /DEF=Mus musculus strain ISS Rad21 (Rad21) mRNA, complete cds. /PROD=Rad21 /FL=gb:AF332086.1 gb:AF332085.1                                                                                                                                                                                                                                                                                                         | 823.76666 | 335.08176 | 380.09998  | 241.96138  | 1.8592664 | 3.0 | 0.15994632 | 0.2629748  | 0.46 | 2.17 |
| gb:NM_009009.1 gb:D49429.1                                                                                                                                                                                                                                                                                                                                                                                                                                                                                                                           |           |           |            |            |           |     |            |            |      |      |
| gb:BC004826.1 /DB_XREF=gi:13435955 /FEA=FLmRNA /CNT=206 /TID=Mm.2079.1 /TIER=FL+Stack /STK=57 /UG=Mm.2079 /LL=30273 /UG_GENE=Syny2 /DEF=Mus musculus synaptogyrin 2, clone MGC:6483 IMAGE:2946657, mRNA, complete cds. /PROD=synaptogyrin 2 /FL=gb:AF394049.1 gb:BC004829.1 gb:AF151985.1 gb:NM_009304.1                                                                                                                                                                                                                                             | 1586.0668 | 384.5148  | 1058.5     | 310.58392  | 1.8486891 | 3.0 | 0.1616351  | 0.2645597  | 0.67 | 1.5  |
| gb:AK007572.1 /DB_XREF=gi:12841200 /FEA=mRNA /CNT=171 /TID=Mm.161667.1 /TIER=ConsEnd /STK=0 /UG=Mm.161667 /LL=89115 /UG_GENE=1810021D01R/K /UG_TITLE=RIKEN cDNA 1810021D01 gene /DEF=Mus musculus 10 day old day hatched cDNA, RIKEN full-length enriched library, clone 1810021D01.homolog to CDNA FLJ10479 FIS, CLONE NT2RP200120 (DC1) HYPOTHETICAL 39.8 KDA PROTEIN), full insert sequence.                                                                                                                                                      | 941.5667  | 57.336903 | 622.8334   | 247.26883  | 2.1749341 | 2.0 | 0.16164558 | 0.2633957  | 0.66 | 1.51 |
| gb:NM_026465.1 /DB_XREF=gi:13385959 /GEN=Atpgs2 /FEA=FLmRNA /CNT=334 /TID=Mm.10314.1 /TIER=FL+Stack /STK=154 /UG=Mm.10314 /LL=67942 /DEF=Mus musculus ATP synthase, H+ transporting, mitochondrial F0 complex, subunit c (subunit 9), isoform 2 (Atpgs2), mRNA. /PROD=ATP synthase, H+ transporting, mitochondrial F0 complex, subunit c (subunit 9), isoform 2 /FL=gb:NM_026468.1 gb:BC068913.1                                                                                                                                                     | 13885.966 | 3905.741  | 8379.966   | 1993.4896  | 2.1748064 | 3.0 | 0.16166022 | 0.2622488  | 0.6  | 1.66 |
| gb:BC019442.1 /DB_XREF=gi:18043191 /FEA=FLmRNA /CNT=127 /TID=Mm.185518.1 /TIER=FL+Stack /STK=87 /UG=Mm.185518 /DEF=Mus musculus, clone MGC:25803 IMAGE:4036849, mRNA, complete cds. /PROD=Unknown (protein for MGC:25803) /FL=gb:BC014795.1 gb:BC019442.1                                                                                                                                                                                                                                                                                            | 772.5     | 196.32268 | 505.13333  | 85.66692   | 2.1619692 | 2.0 | 0.16314003 | 0.26347837 | 0.65 | 1.53 |
| gb:NM_006713.1 /DB_XREF=gi:6079069 /GEN=Nos3 /FEA=FLmRNA /CNT=49 /TID=Mm.12637.1 /TIER=FL+Stack /STK=25 /UG=Mm.12637 /UG_GENE=181017 /DEF=Mus musculus nitric oxide synthase 3, endothelial cell (Nos3), mRNA. /PROD=nitric oxide synthase 3, endothelial cell /FL=gb:U53142.1 gb:NM_006713.1                                                                                                                                                                                                                                                        | 1535.2333 | 382.03305 | 1020.69995 | 303.48578  | 1.8265747 | 3.0 | 0.16523309 | 0.26568317 | 0.66 | 1.5  |
| gb:AC040695.1 /DB_XREF=gi:12836055 /FEA=mRNA /CNT=184 /TID=Mm.34763.1 /TIER=Stack /STK=111 /UG=Mm.34763 /LL=71732 /UG_GENE=1200011A11R/K /UG_TITLE=RIKEN cDNA 1200011A11 gene /DEF=Mus musculus adult male lung cDNA, RIKEN full-length enriched library, clone 1200011A11.homolog to VACUOLAR PROTEIN SORTING PROTEIN 11, full insert sequence.                                                                                                                                                                                                     | 578.6333  | 199.9345  | 324.93332  | 53.362926  | 2.123492  | 2.0 | 0.1676879  | 0.26844773 | 0.56 | 1.78 |
| gb:BC019836.1 /DB_XREF=gi:18043722 /FEA=FLmRNA /CNT=420 /TID=Mm.22248.2 /TIER=FL+Stack /STK=125 /UG=Mm.22248 /LL=16010 /UG_GENE=Igf2bp4 /DEF=Mus musculus, insulin-like growth factor binding protein 4, clone MGC:29917 IMAGE:5123738, mRNA, complete cds. /PROD=insulin-like growth factor binding protein 4 /FL=gb:BC019836.1                                                                                                                                                                                                                     | 5639.267  | 1676.5708 | 3555.6335  | 1113.3978  | 1.7931857 | 3.0 | 0.17084232 | 0.27230328 | 0.63 | 1.59 |
| gb:BC016699.1 /DB_XREF=gi:12836055 /FEA=mRNA /CNT=207 /TID=Mm.28492.1 /TIER=FL+Stack /STK=110 /UG=Mm.28492 /DEF=Mus musculus, clone MGC:6816 IMAGE:2648707, mRNA, complete cds. /PROD=Unknown (protein for MGC:6816) /FL=gb:BC016699.1                                                                                                                                                                                                                                                                                                               | 860.1333  | 288.7083  | 484.16666  | 115.139244 | 2.0950768 | 2.0 | 0.17115806 | 0.27162042 | 0.56 | 1.78 |
| gb:BC020255.1 /DB_XREF=gi:12805192 /FEA=FLmRNA /CNT=194 /TID=Mm.1506.1 /TIER=FL+Stack /STK=73 /UG=Mm.1508 /LL=12257 /UG_GENE=Grpr /DEF=Mus musculus, Similar to benzodiazepine receptor, peripheral, clone MGC:6086 IMAGE:3493196, mRNA, complete cds. /PROD=Similar to benzodiazepine receptor, peripheral /FL=gb:NM_009775.1 gb:L17306.1 gb:BC020255.1 gb:D21207.1                                                                                                                                                                                 | 1181.9333 | 402.33136 | 650.36664  | 178.55083  | 2.091686  | 2.0 | 0.17157866 | 0.27110913 | 0.55 | 1.82 |
| gb:NM_008281.2 /DB_XREF=gi:7949140 /GEN=Zfp143 /FEA=FLmRNA /CNT=51 /TID=Mm.10815.1 /TIER=FL+Stack /STK=29 /UG=Mm.10815 /LL=20841 /DEF=Mus musculus zinc finger protein 143 (Zfp143), mRNA. /PROD=zinc finger protein 143                                                                                                                                                                                                                                                                                                                             | 352.66666 | 124.71    | 200.73334  | 18.59068   | 2.087083  | 2.0 | 0.17215186 | 0.27084237 | 0.57 | 1.76 |
| gb:AF011758.2 gb:NM_009281.2                                                                                                                                                                                                                                                                                                                                                                                                                                                                                                                         |           |           |            |            |           |     |            |            |      |      |
| gb:NM_009612.1 /DB_XREF=gi:1012066 /GEN=Fxyd5 /FEA=FLmRNA /CNT=58 /TID=Mm.1870.1 /TIER=FL+Stack /STK=26 /UG=Mm.1870 /LL=18301 /DEF=Mus musculus FXYD domain-containing ion transport regulator 5 (Fxyd5), mRNA. /PROD=related to ion channel /FL=gb:U72680.1 gb:NM_008761.2                                                                                                                                                                                                                                                                          | 1579.3999 | 339.63223 | 955.8667   | 502.16968  | 1.7814642 | 3.0 | 0.17286329 | 0.27079442 | 0.61 | 1.65 |
| gb:NM_008940.1 /DB_XREF=gi:6679486 /GEN=Klk6 /FEA=FLmRNA /CNT=11 /TID=Mm.5193.2 /TIER=FL /STK=7 /UG=Mm.5193 /LL=16624 /DEF=Mus musculus kallikrein 6 (Klk6), mRNA. /PROD=protease, serine, 19 (neuropilin) /FL=gb:NM_008940.1                                                                                                                                                                                                                                                                                                                        | 514.4666  | 147.93588 | 316.46667  | 73.88783   | 2.0739162 | 2.0 | 0.173806   | 0.27110764 | 0.62 | 1.63 |
| gb:NM_008592.1 /DB_XREF=gi:6679834 /GEN=Foxc1 /FEA=FLmRNA /CNT=61 /TID=Mm.12948.1 /TIER=FL+Stack /STK=9 /UG=Mm.12949 /LL=17300 /DEF=Mus musculus forkhead box C1 (Foxc1), mRNA. /PROD=forkhead box C1 /FL=gb:AF045017.1                                                                                                                                                                                                                                                                                                                              | 284.06668 | 94.30697  | 169.09999  | 61.060375  | 1.7724156 | 3.0 | 0.17444223 | 0.27094218 | 0.6  | 1.68 |
| gb:NM_008592.1                                                                                                                                                                                                                                                                                                                                                                                                                                                                                                                                       |           |           |            |            |           |     |            |            |      |      |
| gb:NM_022602.1 /DB_XREF=gi:12863570 /GEN=Ndub2 /FEA=FLmRNA /CNT=13 /TID=Mm.29513.1 /TIER=FL /STK=0 /UG=Mm.29513 /LL=66416 /DEF=Mus musculus NADH dehydrogenase (ubiquinone) 1 alpha subcomplex, 7 (14.5KD, B14.5E) (Ndub2), mRNA. /PROD=NADH dehydrogenase (ubiquinone) 1 alpha subcomplex, 7 (14.5KD, B14.5E) /FL=gb:NM_023202.1                                                                                                                                                                                                                    | 12473.101 | 4055.233  | 7557.9     | 2600.8333  | 1.7671416 | 3.0 | 0.17537016 | 0.27122927 | 0.61 | 1.65 |
| gb:NM_007472.1 /DB_XREF=gi:6680709 /GEN=Aqp1 /FEA=FLmRNA /CNT=282 /TID=Mm.18825.1 /TIER=FL+Stack /STK=113 /UG=Mm.18825 /LL=11826 /DEF=Mus musculus aquaporin 1 (Aqp1), mRNA. /PROD=aquaporin 1 /FL=gb:NM_007472.1 gb:BC007125.1 gb:U02914.1                                                                                                                                                                                                                                                                                                          | 9189.899  | 2563.1602 | 5969.3003  | 1845.5371  | 1.7661334 | 3.0 | 0.17554818 | 0.270359   | 0.65 | 1.54 |
| gb:NM_007632.1 /DB_XREF=gi:8724312 /GEN=Ccn3 /FEA=FLmRNA /CNT=286 /TID=Mm.7417.1 /TIER=FL+Stack /STK=172 /UG=Mm.7417 /LL=12445 /DEF=Mus musculus cyclin D3 (Ccn3), mRNA. /PROD=cyclin D3 /FL=gb:BC004076.1 gb:NM_007632.1 gb:M86183.1 gb:BC005605.1                                                                                                                                                                                                                                                                                                  | 1193.2001 | 406.31543 | 681.76666  | 146.32567  | 2.051192  | 2.0 | 0.17671187 | 0.27100772 | 0.57 | 1.75 |
| gb:AK074262.1 /DB_XREF=gi:12851922 /FEA=mRNA /CNT=54 /TID=Mm.45020.1 /TIER=Stack /STK=47 /UG=Mm.45020 /LL=73224 /UG_GENE=3110080A02R/K /UG_TITLE=RIKEN cDNA 3110080A02 gene /DEF=Mus musculus 13 days embryo head cDNA, RIKEN full-length enriched library, clone 3110080A02.unclassified transcript, full insert sequence.                                                                                                                                                                                                                          | 483.83334 | 61.59841  | 314.56668  | 129.55139  | 2.0437663 | 2.0 | 0.17767572 | 0.27134576 | 0.65 | 1.54 |
| gb:NM_080837.1 /DB_XREF=gi:18250287 /GEN=Ii25 /FEA=FLmRNA /CNT=150 /TID=Mm.29925.1 /TIER=FL+Stack /STK=73 /UG=Mm.29925 /LL=28106 /DEF=Mus musculus interleukin 25 (Ii25), mRNA. /PROD=interleukin 25 /FL=gb:AY038184.1 gb:NM_080837.1                                                                                                                                                                                                                                                                                                                | 531.9666  | 172.19682 | 323.43335  | 40.16644   | 2.0427072 | 2.0 | 0.17781377 | 0.2704251  | 0.61 | 1.64 |
| gb:NM_025691.1 /DB_XREF=gi:13359595 /GEN=Mgsl3 /FEA=FLmRNA /CNT=210 /TID=Mm.28823.1 /TIER=FL+Stack /STK=96 /UG=Mm.28823 /LL=66447 /DEF=Mus musculus microsomal glutathione S-transferase 3 (Mgsl3), mRNA. /PROD=microsomal glutathione S-transferase 3 /FL=gb:NM_025691.1                                                                                                                                                                                                                                                                            | 5083.5    | 1483.3075 | 3071.2334  | 1323.4027  | 1.7533147 | 3.0 | 0.17782989 | 0.26932743 | 0.6  | 1.66 |
| gb:NM_007932.1 /DB_XREF=gi:6679648 /GEN=Eng /FEA=FLmRNA /CNT=113 /TID=Mm.4851.1 /TIER=FL+Stack /STK=50 /UG=Mm.4851 /LL=13605 /DEF=Mus musculus endothelial growth factor (Eng), mRNA. /PROD=englerin /FL=gb:NM_007932.1                                                                                                                                                                                                                                                                                                                              | 2786.6335 | 1294.6776 | 1264.8334  | 141.4751   | 2.0238533 | 2.0 | 0.18029575 | 0.27193367 | 0.45 | 2.2  |
| gb:NM_008898.1 /DB_XREF=gi:6679420 /GEN=Por /FEA=FLmRNA /CNT=175 /TID=Mm.3883.1 /TIER=FL+Stack /STK=63 /UG=Mm.3883 /LL=18984 /DEF=Mus musculus P450 (cytochrome) oxidoreductase (Por), mRNA. /PROD=P450 (cytochrome) oxidoreductase /FL=gb:D15751.1 gb:NM_008898.1                                                                                                                                                                                                                                                                                   | 721.4001  | 186.83733 | 446.43335  | 200.67395  | 1.7369798 | 3.0 | 0.18078685 | 0.27155226 | 0.62 | 1.62 |
| gb:NM_008322.1 /DB_XREF=gi:6680342 /GEN=Idh2 /FEA=FLmRNA /CNT=70 /TID=Mm.2966.1 /TIER=FL /STK=2 /UG=Mm.2966 /LL=18227 /DEF=Mus musculus isocitrate dehydrogenase 2 (NADP+), mitochondrial (Idh2), mRNA. /PROD=isocitrate dehydrogenase 2 (NADP+) /FL=gb:NM_008322.1 gb:U15167.1                                                                                                                                                                                                                                                                      | 11169.633 | 2583.2095 | 7453.2993  | 2658.36    | 1.736538  | 3.0 | 0.1808676  | 0.27056015 | 0.67 | 1.5  |
| gb:NM_1                                                                                                                                                                                                                                                                                                                                                                                                                                                                                                                                              |           |           |            |            |           |     |            |            |      |      |

[illegible]

[illegible]

|                                                                                                                                                                                                                                                                                                                                                                                                             |           |           |           |           |            |     |            |            |      |      |
|-------------------------------------------------------------------------------------------------------------------------------------------------------------------------------------------------------------------------------------------------------------------------------------------------------------------------------------------------------------------------------------------------------------|-----------|-----------|-----------|-----------|------------|-----|------------|------------|------|------|
| gb:LA2114.1 /DB_XREF=gi:18654373 /GEN=GDF10 /FEA=FLmRNA /CNT=85 /TID=Mm.40323.1 /TIER=FL+Stack /STK=85 /UG=Mm.40323 /DEF=Mus musculus growth/differentiation factor 10 (GDF10) mRNA, complete cds. /PROD=growth/differentiation factor 10 /FL=gb:LA2114.1                                                                                                                                                   | 339.76666 | 192.45802 | 215.83333 | 47.5599   | 1.0827825  | 2.0 | 0.39208058 | 0.40771914 | 0.64 | 1.57 |
| gb:NM_007657.1 /DB_XREF=gi:6680893 /GEN=Cd9 /FEA=FLmRNA /CNT=324 /TID=Mm.2956.1 /TIER=FL+Stack /STK=135 /UG=Mm.2956 /LL=12527 /DEF=Mus musculus CD9 antigen (Cd9), mRNA. /PROD=CD9 antigen /FL=gb:L08115.1 gb:NM_007657.1                                                                                                                                                                                   | 2590.3333 | 1327.7048 | 1686.2667 | 684.79297 | 1.0481877  | 2.0 | 0.40454426 | 0.41948482 | 0.65 | 1.54 |
| gb:AK004342.1 /DB_XREF=gi:12835491 /FEA=FLmRNA /CNT=37 /TID=Mm.178550.2 /TIER=Stack /STK=1919 /UG=Mm.178550 /LL=66478 /UG_GENE=2410020K10Rik /UG_TITLE=RIKEN cDNA 2410020K10 gene /DEF=Mus musculus 18 days embryo whole body cDNA, RIKEN full-length enriched library, clone:110061M03:homolog to T-CELL SURFACE GLYCOPROTEIN E2 PRECURSOR (E2 ANTIGEN) (CD99) (MC2 PROTEIN) (I2E7), full insert sequence. | 849.5334  | 656.2247  | 453.93335 | 76.852875 | 1.0370659  | 2.0 | 0.40864527 | 0.4225369  | 0.53 | 1.87 |
| gb:BC010564.1 /DB_XREF=gi:14714826 /FEA=FLmRNA /CNT=83 /TID=Mm.219659.1 /TIER=FL+Stack /STK=24 /UG=Mm.219659 /LL=15267 /UG_GENE=Hist2 /DEF=Mus musculus, H2A histone family, member O, clone MGC:5966 IMAGE:3582122, mRNA, complete cds. /PROD=H2A histone family, member O /FL=gb:NM_013549.1 gb:BC010564.1                                                                                                | 1537.0668 | 912.65375 | 992.8333  | 134.19629 | 1.0218685  | 2.0 | 0.41432413 | 0.42719862 | 0.65 | 1.55 |
| gb:BC019459.1 /DB_XREF=gi:15930030 /FEA=FLmRNA /CNT=83 /TID=Mm.18814.1 /TIER=FL+Stack /STK=10 /UG=Mm.18814 /LL=66898 /UG_GENE=1300006M19Rik /DEF=Mus musculus, RIKEN cDNA 1300006M19 gene, clone MGC:8269 IMAGE:3592632, mRNA, complete cds. /PROD=RIKEN cDNA 1300006M19 gene /FL=gb:BC015459.1                                                                                                             | 992.26666 | 1056.4161 | 371.96667 | 48.13329  | 1.015961   | 2.0 | 0.41655517 | 0.42828912 | 0.37 | 2.67 |
| gb:NM_010890.1 /DB_XREF=gi:13964148 /GEN=Nedd4a /FEA=FLmRNA /CNT=23 /TID=Mm.18553.1 /TIER=FL /STK=1 /UG=Mm.18553 /LL=17599 /DEF=Mus musculus neural precursor cell expressed, developmentally down-regulated gene 4a (Nedd4a), mRNA. /PROD=neural precursor cell expressed, developmentally down-regulated gene 4a /FL=gb:NM_010890.1                                                                       | 1768.7333 | 992.5988  | 1140.6    | 479.7904  | 0.98683304 | 2.0 | 0.42775115 | 0.4385651  | 0.64 | 1.55 |
| gb:BC019775.1 /DB_XREF=gi:18043802 /FEA=FLmRNA /CNT=156 /TID=Mm.214514.1 /TIER=FL+Stack /STK=98 /UG=Mm.214514 /LL=116847 /UG_GENE=Prep /DEF=Mus musculus, proline arginine-rich end leucine-rich repeat, clone MGC:25825 IMAGE:4165772, mRNA, complete cds. /PROD=proline arginine-rich end leucine-rich repeat /FL=gb:BC019775.1 gb:NM_054077.1                                                            | 3675.5667 | 1965.7422 | 2444.2334 | 1320.7708 | 0.90055424 | 3.0 | 0.4341985  | 0.44392845 | 0.66 | 1.5  |
| gb:AK000203.1 /DB_XREF=gi:12842246 /FEA=FLmRNA /CNT=83 /TID=Mm.18814.1 /TIER=Stack /STK=25 /UG=Mm.18814 /LL=66898 /UG_GENE=1300006M19Rik /UG_TITLE=RIKEN cDNA 1300006M19 gene /DEF=Mus musculus adult male small intestine cDNA, RIKEN full-length enriched library, clone:2010012D17:homolog to INSULIN RECEPTOR TYROSINE KINASE SUBSTRATE, full insert sequence. /FL=gb:BC015459.1                        | 2052.7    | 2641.6304 | 592.10004 | 181.3516  | 0.95542985 | 2.0 | 0.4401908  | 0.44879788 | 0.29 | 3.47 |
| gb:NM_013550.1 /DB_XREF=gi:7305140 /GEN=Hist4 /FEA=FLmRNA /CNT=9 /TID=Mm.193557.1 /TIER=FL /STK=1 /UG=Mm.193557 /LL=15269 /DEF=Mus musculus histone 4 protein (Hist4), mRNA. /PROD=histone 4 protein /FL=gb:NM_013550.1                                                                                                                                                                                     | 2056.1667 | 1616.3438 | 1194.2001 | 14.616449 | 0.9236334  | 2.0 | 0.45318398 | 0.4607581  | 0.58 | 1.72 |
| gb:AB010742.1 /DB_XREF=gi:3062840 /FEA=FLmRNA /CNT=27 /TID=Mm.6254.1 /TIER=FL /STK=3 /UG=Mm.6254 /LL=22229 /UG_GENE=Ucp3 /DEF=Mus musculus mRNA for UCP3, complete cds. /PROD=UCP3 /FL=gb:AB010742.1 gb:AF030164.1                                                                                                                                                                                          | 529.93335 | 380.70724 | 337.53336 | 105.21071 | 0.84371    | 2.0 | 0.4876572  | 0.4944302  | 0.64 | 1.57 |
| gb:NM_009464.1 gb:AB008216.1 gb:AF053352.1 gb:AF032902.1                                                                                                                                                                                                                                                                                                                                                    |           |           |           |           |            |     |            |            |      |      |
| gb:NM_017370.1 /DB_XREF=gi:3850218 /GEN=Hp /FEA=FLmRNA /CNT=154 /TID=Mm.26730.1 /TIER=FL+Stack /STK=33 /UG=Mm.26730 /LL=15439 /DEF=Mus musculus haptoglobin (Hp), mRNA. /PROD=haptoglobin /FL=gb:NM_017370.1 gb:M66827.1                                                                                                                                                                                    | 705.19995 | 506.99698 | 440.69998 | 253.31256 | 0.8083316  | 2.0 | 0.5037641  | 0.50934595 | 0.62 | 1.6  |
| gb:NM_010180.1 /DB_XREF=gi:6753821 /GEN=Fbinn1 /FEA=FLmRNA /CNT=91 /TID=Mm.219663.1 /TIER=FL+Stack /STK=41 /UG=Mm.219663 /LL=14114 /DEF=Mus musculus fibulin 1 (Fbinn1), mRNA. /PROD=fibulin 1 /FL=gb:NM_010180.1                                                                                                                                                                                           | 835.6333  | 728.61206 | 505.8666  | 168.10336 | 0.76385224 | 2.0 | 0.52476585 | 0.5291147  | 0.61 | 1.65 |
| gb:NM_009052.1 /DB_XREF=gi:6677720 /GEN=Reox3 /FEA=FLmRNA /CNT=77 /TID=Mm.14768.1 /TIER=FL+Stack /STK=56 /UG=Mm.14768 /LL=19716 /DEF=Mus musculus reduced expression 3 (Reo3), mRNA. /PROD=reduced expression 3 /FL=gb:AF051347.1                                                                                                                                                                           | 1297.2999 | 1452.1323 | 657.06665 | 84.7658   | 0.76234937 | 2.0 | 0.5254902  | 0.52838546 | 0.51 | 1.97 |
| gb:NM_009052.1 gb:AF097438.1                                                                                                                                                                                                                                                                                                                                                                                |           |           |           |           |            |     |            |            |      |      |
| gb:AK004564.1 /DB_XREF=gi:12835818 /FEA=mRNA /CNT=74 /TID=Mm.46346.1 /TIER=Stack /STK=30 /UG=Mm.46346 /LL=66866 /UG_GENE=1200003G01Rik /UG_TITLE=RIKEN cDNA 1200003G01 gene /DEF=Mus musculus adult male lung cDNA, RIKEN full-length enriched library, clone:1200003G01:NHL repeat containing protein, full insert sequence.                                                                               | 495.19998 | 386.70343 | 330.69998 | 64.495186 | 0.72675955 | 2.0 | 0.5429257  | 0.54441726 | 0.67 | 1.5  |
| gb:NM_050037.1 /DB_XREF=gi:16850086 /GEN=Scgb3a1 /FEA=FLmRNA /CNT=13 /TID=Mm.22802.1 /TIER=FL /STK=7 /UG=Mm.22802 /LL=68662 /DEF=Mus musculus secretoglobin, family 3A, member 1 (Scgb3a1), mRNA. /PROD=UGRP type A /FL=gb:NM_054037.1 gb:AF313456.1                                                                                                                                                        | 6362.733  | 6998.1064 | 3526.5332 | 5637.334  | 0.5466609  | 3.0 | 0.62264764 | 0.62264764 | 0.55 | 1.8  |
