# Supplementary material for: Protein Phosphatase 2A Improves Cardiac Functional Response to Ischemia and Sepsis
Source: MDPI journal article supplement (doi:10.3390/ijms23094688), 2022-04-23
Supplement: s1 [file s1]

**Supplementary Table S3.** Cardiac gene expression. A GeneChip Mouse Genome 430 2.0 Array (Affymetrix, Santa Clara, CA, United States) was used to analyze the basal mRNA expression in hearts from PP2A-TG (n=3) and WT (n=3) mice. For analysis, the TM4 application MeV was used (Saeed et al., 2003). Here, analysis was performed with genes that were expressed in both PP2A-TG and WT. First, data were adjusted by a variance filter (percent mode; value 50) and, secondly, analyzed by a t-Test (Welch approximation; alpha (overall threshold p-value): 0.05; P-values based on t-distribution).

| Gene descriptions                                                                                                                                                                                                                                                                                                                                                                                                                                                                                                                                                                                                                                                                                                                   | WT mean   | WT SD     | PP2A-TG mean | PP2A-TG SD | Absolute t value | Degrees of freedom | Adj p value | False discovery rate |
|-------------------------------------------------------------------------------------------------------------------------------------------------------------------------------------------------------------------------------------------------------------------------------------------------------------------------------------------------------------------------------------------------------------------------------------------------------------------------------------------------------------------------------------------------------------------------------------------------------------------------------------------------------------------------------------------------------------------------------------|-----------|-----------|--------------|------------|------------------|--------------------|-------------|----------------------|
| gb.NM_007981.1/DB_XREF=gi:6679738/GEN=Fac2/FEA=FLmRNA/CNT=147/ITD=Mm.28962.1/ТИER=FL+Stack/STK=45 /UG=Mm.28962/LL=14081/DEF=Mus musculus fatty acid Coenzyme A ligase, long chain 2 (Fac2), mRNA./PROD=fatty acid Coenzyme A ligase, long chain 2/FL-gb.NM_007981.1 gb.U15977.1                                                                                                                                                                                                                                                                                                                                                                                                                                                     | 3965.5664 | 415.30035 | 2066.2332    | 226.85002  | 6.9518514        | 3.0                | 0.006105606 | 2.7719452            |
| gb.AK005586.1/DB_XREF=gi:12834343/FEA=mRNA/CNT=119/ITD=Mm.20488.1/ТИER=Stack/STK=50/UG=Mm.20488/LL=76301 /UG_PRODE=111000806Rik/UG_TITLE=RIKEN cDNA111000806, clone J0454.1 gb.NM.007533.1 gb.L47333.1 gb.BC004804.1/DB_XREF=gi:19335929/FEA=FLmRNA/CNT=1277/ITD=Mm.104540.1/ТИER=FL+Stack/STK=115/UG=Mm.104540/LL=108124/UG_GENE=Napa/DEF=Mus musculus, RIKEN cDNA 1500039N14 gene, clone MGC:6399 IMAGE:358469, mRNA, complete cds./PROD=RIKEN cDNA 1500039N14 gene/FL-gb.NM_025898.1 gb.BC004804.1                                                                                                                                                                                                                               | 1412.2666 | 172.08234 | 591.0333     | 137.58932  | 6.455995         | 3.0                | 0.007538527 | 1.7112457            |
| gb.BC006688.1/DB_XREF=gi:13879379/FEA=FLmRNA/CNT=135/ITD=Mm.20396.1/ТИER=FL+Stack/STK=60/UG=Mm.20396/LL=12908 /UG_GENE=Crat/DEF=Mus musculus, Similar to carnitine acetyltransferase, clone MGC:6046 IMAGE:3499169, mRNA, complete cds./PROD=Similar to carnitine acetyltransferase/FL-gb.BC006688.1 gb.NM_007760.1                                                                                                                                                                                                                                                                                                                                                                                                                 | 4650.733  | 358.1267  | 2468.2334    | 466.95862  | 6.4237013        | 3.0                | 0.007646559 | 1.1571792            |
| gb.NM_007533.1/DB_XREF=gi:6671623/GEN=Bckdha/FEA=FLmRNA/CNT=211/ITD=Mm.25848.1/ТИER=FL+Stack/STK=76 /UG=Mm.25848/LL=12039/DEF=Mus musculus branched chain ketoadid dehydrogenase E1, alpha polypeptide (Bckdha), mRNA. (Parar)-branched chain ketoadid dehydrogenase E1, alpha polypeptide/FL-gb.BC003787.1 gb.NM_007533.1 gb.L47333.1 /UG_PRODE=111000806Rik/UG_TITLE=RIKEN cDNA111000806, clone J0454.1 gb.NM.007533.1 gb.L47333.1 gb.BC004804.1/DB_XREF=gi:19335929/FEA=FLmRNA/CNT=1277/ITD=Mm.104540.1/ТИER=FL+Stack/STK=115/UG=Mm.104540/LL=108124/UG_GENE=Napa/DEF=Mus musculus, RIKEN cDNA 1500039N14 gene, clone MGC:6399 IMAGE:358469, mRNA, complete cds./PROD=RIKEN cDNA 1500039N14 gene/FL-gb.NM_025898.1 gb.BC004804.1 | 2700.0334 | 286.70358 | 1546.7666    | 192.90247  | 5.780555         | 3.0                | 0.010295443 | 1.1685328            |
| gb.AB056479.1/DB_XREF=gi:15341205/FEA=FLmRNA/CNT=427/ITD=Mm.43822.1/ТИER=FL+Stack/STK=32/UG=Mm.43822/LL=12974 /UG_GENE=Cs/DEF=Mus musculus mRNA for citrate synthase, complete cds./PROD=citrate synthase/FL-gb.BC013554.1 gb.NM_026444.1 gb.AB056479.1                                                                                                                                                                                                                                                                                                                                                                                                                                                                             | 3668.7334 | 270.4928  | 2305.8333    | 327.08664  | 5.5616684        | 3.0                | 0.011467959 | 0.8677422            |
| gb.NM_008916.1/DB_XREF=gi:6679448/GEN=Pps/FEA=FLmRNA/CNT=174/ITD=Mm.1458.1/ТИER=FL+Stack/STK=115/UG=Mm.1458/LL=19062/DEF=Mus musculus putative phosphatase (Pps), mRNA./PROD=putative phosphatase/FL-gb.BC013554.1 gb.AF483522.1 gb.NM_008916.1 gb.U96724.1                                                                                                                                                                                                                                                                                                                                                                                                                                                                         | 1440.2001 | 142.18462 | 787.8        | 161.60974  | 5.2495723        | 3.0                | 0.013461299 | 0.8730614            |
| gb.NM_007968.1/DB_XREF=gi:66881272/GEN=Eef1a2/FEA=FLmRNA/CNT=64/ITD=Mm.2645.1/ТИER=FL+Stack/STK=31/UG=Mm.2645/LL=13628/DEF=Mus musculus eukaryotic translation elongation factor 1 alpha 2 (Eef1a2), mRNA./PROD=eukaryotic translation elongation factor 1 alpha2/FL-gb.L26479.1 gb.NM_007968.1 gb.BC018235.1                                                                                                                                                                                                                                                                                                                                                                                                                       | 17134.666 | 2077.833  | 9926.967     | 1596.6765  | 4.7641034        | 3.0                | 0.017563034 | 0.9967022            |
| gb.NM_029632.1/DB_XREF=gi:18390326/GEN=Ppp1r11/FEA=FLmRNA/CNT=146/ITD=Mm.46176.1/ТИER=FL+Stack/STK=58 /UG=Mm.46176/LL=76497/DEF=Mus musculus protein phosphatase 1, regulatory (inhibitor) subunit 11 (Ppp1r11), mRNA./PROD=protein phosphatase 1, regulatory (inhibitor) subunit 11/FL-gb.NM_029632.1                                                                                                                                                                                                                                                                                                                                                                                                                              | 3319.6667 | 170.52585 | 1640.5333    | 382.8957   | 6.9386435        | 2.0                | 0.020145172 | 1.0162121            |
| gb.BC018355.1/DB_XREF=gi:17390829/FEA=FLmRNA/CNT=80/ITD=Mm.23809.1/ТИER=FL+Stack/STK=2/UG=Mm.23809/LL=56748 /UG_GENE=Hirp5/DEF=Mus musculus, histone cell cycle regulation defective interacting protein 5, clone MGC:5675 IMAGE:3584656, mRNA, complete cds./PROD=histone cell cycle regulation defective interacting protein 5/FL-gb.NM_020045.1 gb.BC018355.1                                                                                                                                                                                                                                                                                                                                                                    | 3284.8333 | 224.78094 | 2328.8333    | 292.29797  | 4.490613         | 3.0                | 0.020605719 | 0.93549967           |
| gb.AK002443.1/DB_XREF=gi:12832431/FEA=FLmRNA/CNT=204/ITD=Mm.180189.1/ТИER=Stack/STK=57/UG=Mm.180189/LL=67800 /UG_GENE=Dygl2/UG_TITLE=dacylglycerol O-acyltransferase 2/DEF=Mus musculus adult male kidney cDNA, RIKEN full-length enriched library, clone 0610010B06, homolog to WUGSC.H_DJ0747618.5 PROTEIN (FRAGMENT), full insert sequence./FL-gb.AF384160.1 gb.NM_026384.1                                                                                                                                                                                                                                                                                                                                                      | 2753.4001 | 267.295   | 1639.7334    | 105.6523   | 6.7112303        | 2.0                | 0.021489117 | 0.88691443           |
| gb.NM_007476.1/DB_XREF=gi:6680715/GEN=Arf1/FEA=FLmRNA/CNT=64/ITD=Mm.6836.1/ТИER=FL/STK=2/UG=Mm.6836/LL=11840 /DEF=Mus musculus ADP-ribosylation factor 1 (Arf1), mRNA./PROD=ADP-ribosylation factor 1/FL-gb.D87898.1 gb.NM_007476.1 gb.BC027445.1/DB_XREF=gi:20071862/FEA=FLmRNA/CNT=79/ITD=Mm.153891.1/ТИER=FL+Stack/STK=28/UG=Mm.153891/LL=19245/UG_GENE=Pp4a3/DEF=Mus musculus, protein tyrosine phosphatase 4a3, clone MGC:36146 IMAGE:4482106, mRNA, complete cds./PROD=protein tyrosine phosphatase 4a3/FL-gb.NM_007476.1 gb.BC027445.1 gb.BC027445.1                                                                                                                                                                         | 3634.5999 | 385.0914  | 2027.2666    | 170.24298  | 6.6120944        | 2.0                | 0.022116944 | 0.77239174           |
| gb.BC017689.1/DB_XREF=gi:17389288/FEA=FLmRNA/CNT=148/ITD=Mm.19258.1/ТИER=FL+Stack/STK=47/UG=Mm.19258/LL=66951 /UG_GENE=2310028D0Rik/DEF=Mus musculus, Similar to tyrothroph embryonic factor, clone MGC:19233 IMAGE:4242534, mRNA, complete cds./PROD=Similar to tyrothroph embryonic factor/FL-gb.BC017689.1                                                                                                                                                                                                                                                                                                                                                                                                                       | 2227.3333 | 188.9985  | 1486.5       | 238.61961  | 4.2153683        | 3.0                | 0.024394894 | 0.79109156           |
| gb.AK005305.1/DB_XREF=gi:12833890/FEA=mRNA/CNT=51/ITD=Mm.46367.1/ТИER=Stack/STK=12/UG=Mm.46367/LL=68453 /UG_GENE=1110002J19Rik/UG_TITLE=RIKEN cDNA 1110002J19 gene/DEF=Mus musculus 18 days embryo whole body cDNA, RIKEN full-length enriched library, clone 1110002J19, unclassifiable, full insert sequence.                                                                                                                                                                                                                                                                                                                                                                                                                     | 5818.1997 | 927.7161  | 3272.6667    | 519.24005  | 4.1471405        | 3.0                | 0.025470959 | 0.770921             |
| gb.NM_011179.1/DB_XREF=gi:7242190/GEN=Psp/FEA=FLmRNA/CNT=332/ITD=Mm.3363.1/ТИER=FL/STK=1/UG=Mm.3363/LL=19159/DEF=Mus musculus Psp, clone MGC:5675 IMAGE:3584656, mRNA, complete cds./PROD=protein tyrosine phosphatase 4a3/FL-gb.NM_011179.1 gb.BC027445.1 gb.BC027445.1                                                                                                                                                                                                                                                                                                                                                                                                                                                            | 5425.933  | 628.29877 | 2125.7332    | 1085.7566  | 4.06974          | 3.0                | 0.026767017 | 0.75951415           |
| gb.BC024138.1/DB_XREF=gi:18892248/FEA=FLmRNA/CNT=267/ITD=Mm.22926.1/ТИER=FL+Stack/STK=1/UG=Mm.22926/LL=66698 /UG_GENE=231007L09Rik/DEF=Mus musculus, RIKEN cDNA 231007L09 gene, clone MGC:37973 IMAGE:5136320, mRNA, complete cds./PROD=RIKEN cDNA 231007L09 gene/FL-gb.BC024138.1                                                                                                                                                                                                                                                                                                                                                                                                                                                  | 1782.4    | 251.44804 | 1036.3667    | 201.14285  | 4.012932         | 3.0                | 0.027772743 | 0.7416956            |
| gb.AF422244.1/DB_XREF=gi:17026373/GEN=Mdp77/FEA=FLmRNA/CNT=35/ITD=Mm.33173.1/ТИER=FL/STK=4/UG=Mm.33173/LL=69508/DEF=Mus musculus muscle-derived protein MDP77 variant 1 (Mdp77) mRNA, complete cds./PROD=muscle-derived protein MDP77 variant 1/FL-gb.AF422244.1 gb.NM_138628.1 gb.AF422245.1                                                                                                                                                                                                                                                                                                                                                                                                                                       | 5097.6665 | 429.47256 | 3562.9666    | 519.5502   | 3.9434373        | 3.0                | 0.029070232 | 0.73321587           |
| gb.BC018355.1/DB_XREF=gi:17390829/FEA=FLmRNA/CNT=80/ITD=Mm.23809.1/ТИER=FL+Stack/STK=2/UG=Mm.23809/LL=56748 /UG_GENE=Hirp5/DEF=Mus musculus, histone cell cycle regulation defective interacting protein 5, clone MGC:5675 IMAGE:3584656, mRNA, complete cds./PROD=histone cell cycle regulation defective interacting protein 5/FL-gb.NM_020045.1 gb.BC018355.1                                                                                                                                                                                                                                                                                                                                                                    | 2181.5    | 125.08818 | 1068.4       | 314.64484  | 5.693912         | 2.0                | 0.029487085 | 0.70458615           |
| gb.AF206720.1/DB_XREF=gi:6636320/FEA=FLmRNA/CNT=130/ITD=Mm.38469.1/ТИER=FL+Stack/STK=83/UG=Mm.38469/LL=11785 /UG_GENE=Apb1/DEF=Mus musculus Fe65 mRNA, complete cds./PROD=Fe65/FL-gb.AF206720.1                                                                                                                                                                                                                                                                                                                                                                                                                                                                                                                                     | 1659.7334 | 267.31207 | 867.3        | 232.41673  | 3.8747864        | 3.0                | 0.030429503 | 0.69074976           |
| gb.BI408679.1/DB_XREF=gi:15169602/DB_XREF=602964304F1/CLONE=IMAGE:5119896/FEA=mRNA/CNT=61/ITD=Mm.29389.1/ТИER=Stack/STK=30/UG=Mm.29389/LL=51939/DEF=Mus musculus, Similar to KIA1075 protein, clone IMAGE:5095927, mRNA, partial cds                                                                                                                                                                                                                                                                                                                                                                                                                                                                                                | 1488.9    | 179.23257 | 810.2        | 246.92395  | 3.8527741        | 3.0                | 0.030882569 | 0.6676517            |
| gb.NM_009883.1/DB_XREF=gi:6753555/FEA=FLmRNA/CNT=522/ITD=Mm.2747.1/ТИER=FL+Stack/STK=193/UG=Mm.2747/LL=13083/DEF=Mus musculus Cdh23, cathepsin D (Cdh23), mRNA./PROD=cathepsin D/FL-gb.NM_009883.1                                                                                                                                                                                                                                                                                                                                                                                                                                                                                                                                  | 5454.1333 | 777.9049  | 3241.0332    | 625.04315  | 3.8412483        | 3.0                | 0.031123256 | 0.6422708            |
| gb.U82470.1/DB_XREF=gi:2690301/GEN=G32/FEA=FLmRNA/CNT=238/ITD=Mm.18916.1/ТИER=FL/STK=1/UG=Mm.18916/LL=14719/DEF=Mus musculus aspartate aminotransferase precursor (Got-2) mRNA, Got-2 a allele, complete cds; nuclear gene for mitochondrial product./PROD=aspartate aminotransferase precursor (Got-2) mRNA, Got-2 a allele, complete cds; nuclear gene for mitochondrial product./FL-gb.U82470.1 gb.UJ02622.1 gb.NM_010325.1                                                                                                                                                                                                                                                                                                      | 4684.267  | 741.73334 | 2668.0999    | 544.53687  | 3.795118         | 3.0                | 0.032111008 | 0.63384336           |
| gb.AK003207.1/DB_XREF=gi:12833731/FEA=mRNA/CNT=179/ITD=Mm.29998.1/ТИER=Stack/STK=95/UG=Mm.29998/LL=66853 /UG_GENE=0610039C2Rik/UG_TITLE=RIKEN cDNA 0610039C2 gene/DEF=Mus musculus 18 days embryo whole body cDNA, RIKEN full-length enriched library, clone 1110001C14, similar to HYPOTHETICAL 19.8 KDA PROTEIN (FRAGMENT), full insert sequence.                                                                                                                                                                                                                                                                                                                                                                                 | 4345.7    | 245.63489 | 2401.5999    | 592.12665  | 5.2527237        | 2.0                | 0.034385104 | 0.65045154           |
| gb.BC003447.1/DB_XREF=gi:13097416/FEA=FLmRNA/CNT=395/ITD=Mm.12758.1/ТИER=FL+Stack/STK=94/UG=Mm.12758/LL=14228 /UG_GENE=Fkbp4/DEF=Mus musculus, FK506 binding protein 4 (59 kDa), clone MGC:6528 IMAGE:2651490, mRNA, complete cds./PROD=FK506 binding protein 4 (59 kDa)/FL-gb.NM_010219.1 gb.BC003447.1                                                                                                                                                                                                                                                                                                                                                                                                                            | 1799.4    | 258.09253 | 969.4666     | 96.33808   | 5.217995         | 2.0                | 0.03482062  | 0.63234246           |
| gb.AJ007905.1/DB_XREF=gi:3336885/GEN=edr/FEA=mRNA/CNT=7/ITD=Mm.35829.2/ТИER=ConsEnd/STK=5/UG=Mm.35829/LL=170942/DEF=Mus musculus mRNA for erythroid differentiation regulator, partial./PROD=erythroid differentiation regulator                                                                                                                                                                                                                                                                                                                                                                                                                                                                                                    | 3188.2668 | 328.84497 | 2022.2999    | 441.76965  | 3.6670012        | 3.0                | 0.03507333  | 0.61243427           |
| gb.BC004613.1/DB_XREF=gi:13435485/FEA=FLmRNA/CNT=159/ITD=Mm.22597.1/ТИER=FL+Stack/STK=30/UG=Mm.22597/LL=69654 /UG_GENE=2310024E0Rik/DEF=Mus musculus, Similar to dynactin 2 (p50), clone MGC:6712 IMAGE:3585310, mRNA, complete cds./PROD=Similar to dynactin 2 (p50)/FL-gb.BC004613.1                                                                                                                                                                                                                                                                                                                                                                                                                                              | 3519.4336 | 404.615   | 2197.7       | 185.29951  | 5.144202         | 3.0                | 0.035773426 | 0.6015235            |
| gb.NM_023464.1/DB_XREF=gi:12963686/GEN=1110003H09Rik/FEA=FLmRNA/CNT=95/ITD=Mm.21444.1/ТИER=FL+Stack/STK=50/UG=Mm.21444/LL=68475/DEF=Mus musculus RIKEN cDNA 1110003H09 gene (1110003H09Rik), mRNA./PROD=RIKEN cDNA 1110003H09/FL-gb.NM_023464.1                                                                                                                                                                                                                                                                                                                                                                                                                                                                                     | 1704.7666 | 181.4112  | 1069.9333    | 244.86806  | 3.6081257        | 3.0                | 0.03655193  | 0.5926634            |
| gb.NM_011390.1/DB_XREF=gi:555533/GEN=Slc12a7/FEA=FLmRNA/CNT=91/ITD=Mm.24510.1/ТИER=FL+Stack/STK=27/UG=Mm.24510/LL=20499/DEF=Mus musculus solute carrier family 12, member 7 (Slc12a7), mRNA./PROD=solute carrier family 12, member 7/FL-gb.NM_011390.1 gb.AF087436.1                                                                                                                                                                                                                                                                                                                                                                                                                                                                | 2386.3    | 263.8338  | 1715.7999    | 187.08417  | 3.5906699        | 3.0                | 0.037005566 | 0.57932854           |
| gb.NM_024225.1/DB_XREF=gi:18034768/GEN=Snx5/FEA=FLmRNA/CNT=386/ITD=Mm.20847.1/ТИER=FL+Stack/STK=39/UG=Mm.20847/LL=69178/DEF=Mus musculus sorting nexin 5 (Snx5), mRNA./PROD=sorting nexin 5/FL-gb.NM_024225.1 gb.BC002242.1                                                                                                                                                                                                                                                                                                                                                                                                                                                                                                         | 1845.6333 | 502.8171  | 3112.2       | 355.3908   | 3.562837         | 3.0                | 0.037743855 | 0.57119036           |
| gb.BC011344.1/DB_XREF=gi:15030176/FEA=FLmRNA/CNT=135/ITD=Mm.22092.2/ТИER=FL+Stack/STK=83/UG=Mm.22092.1/LL=15467/UG_GENE=Erf2ak1/DEF=Mus musculus, clone MGC:5739 IMAGE:3481870, mRNA, complete cds./PROD=Unknown (protein for MGC:5739)/FL-gb.BC011344.1                                                                                                                                                                                                                                                                                                                                                                                                                                                                            | 1550.6333 | 267.75513 | 881.4333     | 195.2781   | 3.497545         | 3.0                | 0.039550956 | 0.5792301            |
| gb.BC027346.1/DB_XREF=gi:20071091/FEA=FLmRNA/CNT=82/ITD=Mm.11545.1/ТИER=FL+Stack/STK=51/UG=Mm.11545/DEF=Mus musculus, clone MGC:28292 IMAGE:4011421, mRNA, complete cds./PROD=Unknown (protein for MGC:28292)/FL-gb.BC027346.1                                                                                                                                                                                                                                                                                                                                                                                                                                                                                                      | 1823.9    | 194.57033 | 1146.9333    | 274.02765  | 3.4888892        | 3.0                | 0.039798737 | 0.5646446            |
| gb.AK010167.1/DB_XREF=gi:12845417/GEN=1cap/FEA=FLmRNA/CNT=567/ITD=Mm.10762.1/ТИER=FL+Stack/STK=40/UG=Mm.10762/LL=21393/UG_TITLE=1cap/DEF=Mus musculus adult male tongue cDNA, RIKEN full-length enriched library, clone 231007E03, 1cap, full insert sequence./FL-gb.NM_011540.1                                                                                                                                                                                                                                                                                                                                                                                                                                                    | 18152.068 | 2419.692  | 11988.667    | 1911.9014  | 3.4616609        | 3.0                | 0.040591177 | 0.5584362            |
| gb.BC003975.1/DB_XREF=gi:13278300/FEA=FLmRNA/CNT=232/ITD=Mm.29737.1/ТИER=FL+Stack/STK=79/UG=Mm.29737/DEF=Mus musculus, Similar to myeloid leukemia factor 2, clone MGC:7424 IMAGE:3488851, mRNA, complete cds./PROD=Similar to myeloid leukemia factor 2/FL-gb.BC003975.1                                                                                                                                                                                                                                                                                                                                                                                                                                                           | 2250.6666 | 502.99188 | 1128.7333    | 275.59164  | 3.3869345        | 3.0                | 0.042871576 | 0.5724616            |
| gb.NM_007383.1/DB_XREF=gi:6880619/GEN=Acads/FEA=FLmRNA/CNT=1137/ITD=Mm.18759.1/ТИER=FL+Stack/STK=35/UG=Mm.18759/DEF=Mus musculus acetyl-Coenzyme A dehydrogenase, short chain (Acads), mRNA./PROD=acetyl-Coenzyme A dehydrogenase, short chain/FL-gb.BC016259.1 gb.NM_007383.1 gb.L1163.1                                                                                                                                                                                                                                                                                                                                                                                                                                           | 2546.2332 | 583.8708  | 1251.8334    | 331.40588  | 3.3393998        | 3.0                | 0.044407293 | 0.576026             |
| gb.AY028963.1/DB_XREF=gi:19847823/FEA=FLmRNA/CNT=18/ITD=Mm.38250.1/ТИER=FL/STK=1/UG=Mm.38250/LL=56490 /UG_GENE=Zfp288/DEF=Mus musculus BTBPOZ zinc finger protein DPZF mRNA, complete cds./PROD=BTBPOZ zinc finger protein DPZF/FL-gb.AF165576.1 gb.NM_019778.1 gb.AY028963.1                                                                                                                                                                                                                                                                                                                                                                                                                                                       | 1758.9    | 300.57047 | 1063.5333    | 202.91864  | 3.3210924        | 3.0                | 0.04501735  | 0.5677188            |
| gb.BC003744.1/DB_XREF=gi:13277677/FEA=FLmRNA/CNT=135/ITD=Mm.3284.1/ТИER=FL+Stack/STK=52/UG=Mm.3284/LL=19060 /UG_GENE=Pyp5c/DEF=Mus musculus, protein phosphatase 5, catalytic subunit, clone MGC:5847 IMAGE:3590322, mRNA, complete cds./PROD=protein phosphatase 5, catalytic subunit/FL-gb.BC003744.1 gb.AF018262.1                                                                                                                                                                                                                                                                                                                                                                                                               | 1179.0    | 253.04428 | 629.6667     | 141.64098  | 3.2810674        | 3.0                | 0.046388563 | 0.5692002            |
| gb.NM_007876.1/DB_XREF=gi:6681216/GEN=Dpep1/FEA=FLmRNA/CNT=49/ITD=Mm.20388.1/ТИER=FL/STK=7/UG=Mm.20388/LL=13479/DEF=Mus musculus dipeptidase 1 (renal) (Dpep1), mRNA./PROD=dipeptidase 1 (renal)/FL-gb.NM_007876.1 gb.BC003492.1                                                                                                                                                                                                                                                                                                                                                                                                                                                                                                    | 2660.8667 | 501.4193  | 1360.6333    | 475.69363  | 3.25838          | 3.0                | 0.04718934  | 0.5637884            |
| gb.BC015263.1/DB_XREF=gi:15929639/FEA=FLmRNA/CNT=72/ITD=Mm.6522.1/ТИER=FL+Stack/STK=40/UG=Mm.6522/LL=121778/UG_GENE=Chnkr1/DEF=Mus musculus, chemokine orphan receptor 1, clone MGC:18378 IMAGE:4242244, mRNA, complete cds./PROD=chemokine orphan receptor 1/FL-gb.BC015263.1 gb.NM_007722.1 gb.AF00026.1                                                                                                                                                                                                                                                                                                                                                                                                                          | 3317.8333 | 177.26184 | 5048.1665    | 652.2934   | 4.433797         | 2.0                | 0.04728927  | 0.5504956            |
| Mus musculus REF=M32599/DEF=Mus mouse glyceraldehyde 3-phosphate dehydrogenase mRNA, complete cds./LEN=1228 (5_3_M_3 represent transcript regions 5 prime, Middle, and 3 prime respectively)                                                                                                                                                                                                                                                                                                                                                                                                                                                                                                                                        | 34215.402 | 7139.477  | 16254.234    | 6410.5503  | 3.2422204        | 3.0                | 0.0477704   | 0.54219407           |
| gb.BC025440.1/DB_XREF=gi:19343555/FEA=FLmRNA/CNT=93/ITD=Mm.22668.2/ТИER=FL+Stack/STK=21/UG=Mm.22668/LL=15356 /UG_GENE=Hmgcl/DEF=Mus musculus, 3-hydroxy-3-methylglutaryl-Coenzyme A lyase, clone MGC:29242 IMAGE:5049759, mRNA, complete cds./PROD=3-hydroxy-3-methylglutaryl-Coenzyme A lyase/FL-gb.BC025440.1                                                                                                                                                                                                                                                                                                                                                                                                                     | 2477.4    | 257.76486 | 1629.1998    | 373.01678  | 3.2401416        | 3.0                | 0.047845803 | 0.52980477           |
| gb.BC008273.1/DB_XREF=gi:14198433/FEA=FLmRNA/CNT=243/ITD=Mm.22514.1/ТИER=FL+Stack/STK=139/UG=Mm.22514/LL=183/UG_GENE=Chnkr1/DEF=Mus musculus, chemokine orphan receptor 1, clone MGC:6312 IMAGE:2811419, mRNA, complete cds./PROD=RIKEN cDNA 0610008F14 gene/FL-gb.BC008273.1                                                                                                                                                                                                                                                                                                                                                                                                                                                       | 8549.866  | 1705.65   | 4106.4336    | 406.7802   | 4.3891153        | 2.0                | 0.048188154 | 0.520891             |
| gb.NM_008733.1/DB_XREF=gi:8679123/GEN=Nrap/FEA=FLmRNA/CNT=12/ITD=Mm.8384.1/ТИER=FL/STK=2/UG=Mm.8384/LL=18175/DEF=Mus musculus nebulin-related anchoring protein (Nrap), mRNA./PROD=nebulin-related anchoring protein/FL-gb.NM_008733.1 gb.U76618.1                                                                                                                                                                                                                                                                                                                                                                                                                                                                                  | 4659.6    | 864.4257  | 2685.7666    | 622.2885   | 3.2097685        | 3.0                | 0.048964903 | 0.51697826           |

|                                                                                                                                                                                                                                                                                                                                                                    |           |           |           |           |           |     |             |            |
|--------------------------------------------------------------------------------------------------------------------------------------------------------------------------------------------------------------------------------------------------------------------------------------------------------------------------------------------------------------------|-----------|-----------|-----------|-----------|-----------|-----|-------------|------------|
| gb:AK012776.1 /DB_XREF=gi:12849742 /FEA=mRNA /CNT=22 /TID=Mm.154145.2 /TIER=ConsEnd /STK=6 /UG=Mm.154145 /LL=66376 /UG_GENE=2310011F05R1K /UG_TITLE=RIKEN cDNA 2310011F05 gene /DEF=Mus musculus, full 10, 11 days embryo whole body cDNA, RIKEN full-length enriched library, clone 2810011F05.2 Zinc finger, C2H2 type containing protein, full insert sequence. | 550.86664 | 266.142   | 1449.6334 | 410.57803 | 3.1815608 | 3.0 | 0.05003401  | 0.51625997 |
| gb:AF171315.1 /DB_XREF=gi:3389171 /GEN=U03670 /FEA=FlmRNA /CNT=115 /TID=Mm.38817 /TIER=FL*Stack /STK=9 /UG=Mm.3981 /LL=26893 /DEF=Mus musculus COP9 complex subunit 6 (COP9b) mRNA, complete cds. /PROD=COP9 complex subunit 6 /FL=gb:AF071315.1 gb:BC004466.1                                                                                                     | 4076.3333 | 382.2838  | 2798.6667 | 588.63916 | 3.1529322 | 3.0 | 0.05114939  | 0.5160405  |
| gb:NM_013562.1 /DB_XREF=gi:305178 /GEN=Ifitd1 /FEA=FlmRNA /CNT=225 /TID=Mm.168.1 /TIER=FL*Stack /STK=134 /UG=Mm.168 /LL=15982 /DEF=Mus musculus interferon-related developmental regulator 1 (Ifitd1), mRNA. /PROD=interferon-related developmental regulator 1 /FL=gb:NM_013562.1                                                                                 | 1775.8002 | 335.17688 | 2668.5    | 362.82657 | 3.1302788 | 3.0 | 0.052054286 | 0.5137532  |
| gb:NM_019502.1 /DB_XREF=gi:9507186 /GEN=Foxc1 /FEA=FlmRNA /CNT=70 /TID=Mm.4050.1 /TIER=FL*Stack /STK=33 /UG=Mm.4050 /LL=1566 /DEF=Mus musculus gut-enriched transcript 1 (Foxc1), mRNA. /PROD=fractured calsia expressed transcript 1 /FL=gb:NM_019502.1 gb:AF150103.1 gb:BC009158.1                                                                               | 1996.7001 | 257.0728  | 1280.0667 | 302.79193 | 3.1249733 | 3.0 | 0.052269127 | 0.50489753 |
| gb:NM_026252.1 /DB_XREF=gi:13385759 /GEN=493044 /D24Rik /FEA=FlmRNA /CNT=161 /TID=Mm.23178.1 /TIER=ConsEnd /STK=0 /UG=Mm.23178 /LL=67579 /DEF=Mus musculus RIKEN cDNA 493044/D24 gene (493044/D24Rik), mRNA. /PROD=RIKEN cDNA 493044/D24 /FL=gb:NM_026252.1                                                                                                        | 2246.3333 | 522.5565  | 3440.5332 | 407.56915 | 3.12117   | 3.0 | 0.052423827 | 0.495842   |
| gb:U20344.1 /DB_XREF=gi:912487 /FEA=FlmRNA /CNT=140 /TID=Mm.4325.1 /TIER=FL*Stack /STK=46 /UG=Mm.4325 /LL=16600 /UG_GENE=Klf4 /DEF=Mus musculus gut-enriched Kruppel-like factor GKLf mRNA, complete cds. /PROD=gut-enriched Kruppel-like factor /FL=gb:BC010301.1 gb:U20344.1 gb:U20344.1 gb:U20344.1 gb:NM_016937.1                                              | 2218.3    | 658.10254 | 3810.5332 | 593.3005  | 3.1124587 | 3.0 | 0.05278034  | 0.48902604 |
| gb:NM_01116.1 /DB_XREF=gi:1920789 /FEA=FlmRNA /CNT=246 /TID=Mm.104975.1 /TIER=FL*Stack /STK=90 /UG=Mm.104975 /LL=66001 /UG_GENE=1300012C15Rik /DEF=Mus musculus, RIKEN cDNA 1300012C15 gene, clone MGC:19018 IMAGE:4023354, mRNA, complete cds. /PROD=RIKEN cDNA 1300012C15 gene /FL=gb:NM_02836.1 gb:BC011116.1                                                   | 1721.4332 | 308.0201  | 978.2334  | 88.368774 | 4.017092  | 2.0 | 0.056745864 | 0.5152525  |
| gb:NM_016715.1 /DB_XREF=gi:7710051 /GEN=Islr /FEA=FlmRNA /CNT=43 /TID=Mm.35771.1 /TIER=FL*Stack /STK=30 /UG=Mm.35771 /LL=57914 /DEF=Mus musculus thymic stromal-derived lymphopoietin, receptor (Islr), mRNA. /PROD=thymic stromal-derived lymphopoietin, receptor /FL=gb:AF232936.1 gb:AB031333.1 gb:AB039945.1 gb:NM_016715.1                                    | 912.63336 | 302.9743  | 1570.6333 | 225.301   | 3.0185394 | 3.0 | 0.05682495  | 0.5058535  |
| gb:BC016280.1 /DB_XREF=gi:16740779 /FEA=FlmRNA /CNT=210 /TID=Mm.19055.1 /TIER=FL*Stack /STK=103 /UG=Mm.19055 /LL=18673 /UG_GENE=1110006E1 /DEF=Mus musculus, RIKEN cDNA 111006E1 gene, clone MGC:28902 IMAGE:4914167, mRNA, complete cds. /PROD=RIKEN cDNA 111006E1 gene /FL=gb:NM_008831.1                                                                        | 2465.0332 | 287.6765  | 1808.0668 | 243.65489 | 3.018338  | 3.0 | 0.056834035 | 0.49620482 |
| gb:NM_133734.1 /DB_XREF=gi:19528929 /GEN=0710008A13Rik /FEA=FlmRNA /CNT=134 /TID=Mm.11535.1 /TIER=FL*Stack /STK=76 /UG=Mm.11535 /LL=71700 /DEF=Mus musculus RIKEN cDNA 0710008A13 gene (0710008A13Rik), mRNA. /PROD=RIKEN cDNA 0710008A13 /FL=gb:NM_133734.1 gb:BC008545.1                                                                                         | 2924.9336 | 463.44464 | 1932.334  | 332.68933 | 3.0135894 | 3.0 | 0.057048753 | 0.4886818  |
| gb:BC019459.1 /DB_XREF=gi:1804385 /FEA=mRNA /CNT=128 /TID=Mm.31025.1 /TIER=Stack /STK=66 /UG=Mm.31025 /LL=76437 /UG_GENE=2310015K15Rik /UG_TITLE=RIKEN cDNA 2310015K15 gene /DEF=Mus musculus, Similar to RIKEN cDNA 2310015K15 gene, clone IMAGE:4035590, mRNA.                                                                                                   | 682.73334 | 297.8792  | 1340.9333 | 235.16748 | 3.003885  | 3.0 | 0.057490736 | 0.48334804 |
| gb:BC010586.1 /DB_XREF=gi:14714881 /FEA=FlmRNA /CNT=95 /TID=Mm.198238.1 /TIER=FL*Stack /STK=141 /UG=Mm.198239 /LL=66734 /UG_GENE=4922501H04Rik /DEF=Mus musculus, MAP1 light chain 3-like protein 1, clone MGC:6325 IMAGE:3256801, mRNA, complete cds. /PROD=MAP1 light chain 3-like protein 1 /FL=gb:BC010586.1                                                   | 8346.8    | 1826.1411 | 4220.5    | 181.96098 | 3.8944106 | 2.0 | 0.060056616 | 0.49574006 |
| gb:AB005361.1 /DB_XREF=gi:2317285 /FEA=FlmRNA /CNT=130 /TID=Mm.1008.1 /TIER=FL*Stack /STK=89 /UG=Mm.1008 /LL=19215 /UG_GENE=Pldgs /DEF=Mus musculus mRNA for prostaglandin D synthetase, complete cds. /PROD=prostaglandin D synthetase /FL=gb:AB005361.1                                                                                                          | 5255.2    | 1303.1003 | 2508.8    | 978.30804 | 2.9193041 | 3.0 | 0.06153079  | 0.4988389  |
| gb:NM_008831.1 /DB_XREF=gi:6672918 /GEN=Phb /FEA=FlmRNA /CNT=260 /TID=Mm.2355.1 /TIER=FL*Stack /STK=58 /UG=Mm.2355 /LL=18673 /UG_GENE=Prohibitin (Phb), mRNA. /PROD=prohibitin /FL=gb:NM_008831.1                                                                                                                                                                  | 6689.0664 | 1162.0282 | 4307.933  | 824.85596 | 2.894155  | 3.0 | 0.06280016  | 0.50019777 |
| gb:NM_013892.1 /DB_XREF=gi:7305570 /GEN=Itgag /FEA=FlmRNA /CNT=194 /TID=Mm.4292.1 /TIER=FL*Stack /STK=141 /UG=Mm.4292 /LL=21847 /DEF=Mus musculus TGFb inducible early growth response (Tieg), mRNA. /PROD=TGFb inducible early growth response /FL=gb:AF04088.1 gb:BC003316.1 gb:NM_013692.1 gb:AF049879.1                                                        | 528.2     | 266.4009  | 1155.1333 | 107.51492 | 3.7798882 | 3.0 | 0.06340678  | 0.49632204 |
| gb:BC010817.1 /DB_XREF=gi:14789892 /FEA=FlmRNA /CNT=138 /TID=Mm.3979.1 /TIER=FL*Stack /STK=25 /UG=Mm.3979 /DEF=Mus musculus, Similar to ubiquitin-like 4, clone MGC:19132 IMAGE:4215699, mRNA, complete cds. /PROD=Similar to ubiquitin-like 4 /FL=gb:BC010817.1                                                                                                   | 1884.5333 | 340.92563 | 1204.4667 | 226.77893 | 2.8767273 | 3.0 | 0.063699044 | 0.49015874 |
| gb:NM_00592.1 /DB_XREF=gi:14714874 /FEA=FlmRNA /CNT=119 /TID=Mm.29553.1 /TIER=FL*Stack /STK=53 /UG=Mm.29553 /LL=60071 /UG_GENE=0610025L15Rik /DEF=Mus musculus, RIKEN cDNA 0610025L15 gene, clone MGC:7048 IMAGE:3156338, mRNA, complete cds. /PROD=RIKEN cDNA 0610025L15 gene /FL=gb:BC010592.1 gb:AB049623.1 gb:NM_023154.1                                      | 1405.4667 | 213.8315  | 834.73334 | 270.21564 | 2.8687627 | 3.0 | 0.06411519  | 0.48513827 |
| gb:NM_007408.1 /DB_XREF=gi:6680849 /GEN=Adfp /FEA=FlmRNA /CNT=309 /TID=Mm.381.1 /TIER=FL*Stack /STK=92 /UG=Mm.381 /LL=1520 /DEF=Mus musculus adipose differentiation related protein (Adfp), mRNA. /PROD=adipose differentiation related protein /FL=gb:M93275.1 gb:NM_007408.1                                                                                    | 2498.2666 | 257.47202 | 1771.2334 | 357.4763  | 2.8584013 | 3.0 | 0.06466167  | 0.4812524  |
| gb:BI076714 /DB_XREF=gi:14515371 /DB_XREF=U0223810-3 /CLONE=U0223810 /FEA=mRNA /CNT=167 /TID=Mm.216195.1 /TIER=Stack /STK=18 /UG=Mm.216195 /UG_TITLE=Mus musculus mV330.1 retroelement mRNA sequence                                                                                                                                                               | 12693.434 | 2625.5188 | 6953.3003 | 530.13385 | 3.7118473 | 2.0 | 0.065527044 | 0.47982705 |
| gb:AK005326.1 /DB_XREF=gi:12834026 /FEA=mRNA /CNT=52 /TID=Mm.41330.1 /TIER=Stack /STK=17 /UG=Mm.41330 /LL=76291 /UG_GENE=1110003008Rik /UG_TITLE=RIKEN cDNA 1110003008 gene /DEF=Mus musculus 18 days embryo whole body cDNA, RIKEN full-length enriched library, clone:1110003008 hypothetical protein, full insert sequence.                                     | 1215.3334 | 282.99225 | 629.76666 | 51.017086 | 3.5270977 | 2.0 | 0.07182983  | 0.48672754 |
| gb:NM_016738.1 /DB_XREF=gi:7949126 /GEN=Rpl13 /FEA=FlmRNA /CNT=11 /TID=Mm.42578.1 /TIER=FL*STK=2 /UG=Mm.42578 /LL=19898 /DEF=Mus musculus ribosomal protein L13 (Rpl13), mRNA. /PROD=ribosomal protein L13 /FL=gb:U28917.1 gb:NM_016738.1                                                                                                                          | 19578.768 | 4562.7007 | 10923.566 | 3138.9824 | 2.7068903 | 3.0 | 0.07335706  | 0.48976624 |
| gb:NM_025570.1 /DB_XREF=gi:20270193 /GEN=Mrp20 /FEA=FlmRNA /CNT=181 /TID=Mm.23825.1 /TIER=FL*Stack /STK=128 /UG=Mm.23825 /LL=66448 /DEF=Mus musculus mitochondrial ribosomal protein L20 (Mrp20), mRNA. /PROD=mitochondrial ribosomal protein L20 /FL=gb:AB049645.1 gb:BC016591.1 gb:NM_025570.1                                                                   | 3240.5664 | 473.0782  | 2285.8    | 388.91672 | 2.700274  | 3.0 | 0.07376892  | 0.48537812 |
| gb:NM_133721.1 /DB_XREF=gi:19526903 /GEN=Iga9 /FEA=FlmRNA /CNT=110 /TID=Mm.23386.1 /TIER=FL*STK=2 /UG=Mm.23386 /LL=70107 /DEF=Mus musculus integrin alpha 9 (Iga9), mRNA. /PROD=integrin alpha 9 /FL=gb:NM_133721.1                                                                                                                                                | 1774.6666 | 433.60614 | 2705.9    | 413.57755 | 2.691753  | 3.0 | 0.074303575 | 0.48191175 |
| gb:AF168781.1 /DB_XREF=gi:12833287 /GEN=Dnpep /FEA=FlmRNA /CNT=197 /TID=Mm.24680.1 /TIER=FL*Stack /STK=123 /UG=Mm.24680 /LL=13437 /DEF=Mus musculus aspartyl aminopeptidase (Dnpep), mRNA. /PROD=aspartyl aminopeptidase /FL=gb:AF005051.1 gb:NM_016878.1                                                                                                          | 1693.6334 | 243.04478 | 1160.1666 | 242.70084 | 2.6901348 | 3.0 | 0.07440565  | 0.47577694 |
| gb:NM_053162.1 /DB_XREF=gi:16716448 /GEN=Mrp34 /FEA=FlmRNA /CNT=111 /TID=Mm.29489.1 /TIER=FL*Stack /STK=96 /UG=Mm.29489 /LL=94065 /DEF=Mus musculus mitochondrial ribosomal protein L34 (Mrp34), mRNA. /PROD=mitochondrial ribosomal protein L34 /FL=gb:NM_053162.1 gb:AB049653.1                                                                                  | 2390.8    | 640.9675  | 1195.1666 | 431.3994  | 2.6803503 | 3.0 | 0.07502657  | 0.47308424 |
| gb:BC003744.1 /DB_XREF=gi:13277677 /FEA=FlmRNA /CNT=135 /TID=Mm.3294.1 /TIER=FL*Stack /STK=52 /UG=Mm.3294 /LL=19080 /UG_GENE=Pp5c /DEF=Mus musculus, protein phosphatase 5, catalytic subunit, clone MGC:5847 IMAGE:3593022, mRNA, complete cds. /PROD=protein phosphatase 5, catalytic subunit /FL=gb:BC003744.1 gb:AF181862.1                                    | 974.39996 | 279.2426  | 455.9     | 185.42218 | 2.6792161 | 3.0 | 0.075098954 | 0.46705377 |
| gb:AF078667.1 /DB_XREF=gi:4322307 /FEA=FlmRNA /CNT=54 /TID=Mm.29030.2 /TIER=FL*STK=1 /UG=Mm.29030 /LL=20411 /UG_GENE=Sorts1 /DEF=Mus musculus ponsin-1 mRNA, complete cds. /PROD=ponsin-1 /FL=gb:AF078667.1                                                                                                                                                        | 4500.3335 | 454.3644  | 2470.4    | 926.83795 | 3.4062045 | 2.0 | 0.07643881  | 0.46896243 |
| gb:NM_019990.1 /DB_XREF=gi:9910481 /GEN=Sdcca28 /FEA=FlmRNA /CNT=125 /TID=Mm.28896.1 /TIER=FL*Stack /STK=29 /UG=Mm.28896 /LL=56018 /DEF=Mus musculus serologically defined colon cancer antigen 28 (Sdcca28), mRNA. /PROD=serologically defined colon cancer antigen 28 /FL=gb:AB031550.1 gb:NM_019990.1                                                           | 2981.7666 | 774.46027 | 1355.2666 | 307.86032 | 3.380319  | 3.0 | 0.0774809   | 0.4690177  |
| gb:NM_011875.1 /DB_XREF=gi:6755209 /GEN=Psm13 /FEA=FlmRNA /CNT=192 /TID=Mm.29760.1 /TIER=FL*Stack /STK=95 /UG=Mm.29760 /LL=29907 /DEF=Mus musculus proleukine (prosome, macrophage) 26S subunit, non-ATPase, 13 (Psm13), mRNA. /PROD=proleukine (prosome, macrophage) 26S subunit, non-ATPase, 13 (Psm13) /FL=gb:AF107838.1                                        | 1570.9667 | 226.58565 | 1053.6    | 253.27943 | 2.6368415 | 3.0 | 0.07786655  | 0.46515015 |
| gb:BC024394.1 /DB_XREF=gi:19354424 /FEA=FlmRNA /CNT=2007 /TID=Mm.34570.2 /TIER=FL*Stack /STK=108 /UG=Mm.34570 /LL=20018 /UG_GENE=Rpo1-3 /DEF=Mus musculus, RNA polymerase 1-3 (16 kDa subunit), clone MGC:36184 IMAGE:4987975, mRNA, complete cds. /PROD=RNA polymerase 1-3 (16 kDa subunit) /FL=gb:BC024394.1                                                     | 1394.3667 | 266.72238 | 763.7     | 316.98865 | 2.6367848 | 3.0 | 0.07787033  | 0.45913157 |
| gb:NM_007638.1 /DB_XREF=gi:8671703 /GEN=Ce7 /FEA=FlmRNA /CNT=513 /TID=Mm.914.1 /TIER=FL*Stack /STK=236 /UG=Mm.914 /LL=12468 /DEF=Mus musculus chaperonin subunit 7 (eta) (Cet7), mRNA. /PROD=chaperonin subunit 7 (eta) /FL=gb:BC008255.1 gb:U07638.1                                                                                                              | 2315.9333 | 46.717625 | 1610.0668 | 360.1172  | 3.3667843 | 2.0 | 0.07803395  | 0.4541976  |
| gb:BC013486.1 /DB_XREF=gi:15489676 /FEA=FlmRNA /CNT=189 /TID=Mm.41389.1 /TIER=FL*Stack /STK=141 /UG=Mm.41389 /LL=66277 /UG_GENE=Klf15 /DEF=Mus musculus, Kruppel-like factor 15, clone MGC:19125 IMAGE:421067, mRNA, complete cds. /PROD=Kruppel-like factor 15 /FL=gb:NM_023184.1 gb:AF317225.1 gb:BC013486.1                                                     | 1641.1333 | 293.1515  | 993.8667  | 309.8631  | 2.6290479 | 3.0 | 0.07838921  | 0.45048988 |
| gb:NM_009777.1 /DB_XREF=gi:6753219 /GEN=C1qb /FEA=FlmRNA /CNT=149 /TID=Mm.2570.1 /TIER=FL*Stack /STK=58 /UG=Mm.2570 /LL=12260 /DEF=Mus musculus complement component 1, q subcomponent, beta polypeptide (C1qb), mRNA. /PROD=complement component 1, q subcomponent, betapolypeptide /FL=gb:M22531.1 gb:M36293.1 gb:NM_009777.1                                    | 2006.4667 | 304.08218 | 1285.4332 | 365.01932 | 2.6287265 | 3.0 | 0.078410864 | 0.44498166 |
| gb:NM_023371.1 /DB_XREF=gi:12663652 /GEN=Pn1 /FEA=FlmRNA /CNT=173 /TID=Mm.7906.1 /TIER=FL*Stack /STK=110 /UG=Mm.7906 /LL=23988 /DEF=Mus musculus protein (peptidyl-prolyl cis-trans isomerase) NIMA-interacting 1 (Pn1), mRNA. /PROD=protein (peptidyl-prolyl cis-trans isomerase) NIMA-interacting 1 /FL=gb:NM_023371.1                                           | 3336.7666 | 475.0641  | 1999.5333 | 480.16516 | 2.613035  | 3.0 | 0.07947676  | 0.44546235 |
| gb:NM_008155.1 /DB_XREF=gi:6680066 /GEN=Gp1 /FEA=FlmRNA /CNT=26 /TID=Mm.589.1 /TIER=FL*Stack /STK=2 /UG=Mm.589 /LL=14751 /DEF=Mus musculus glucose phosphate isomerase 1 complex (Gp1), mRNA. /PROD=glucose phosphate isomerase 1 complex /FL=gb:M14220.1 gb:NM_008155.1                                                                                           | 6017.467  | 1636.3217 | 3145.5999 | 981.9437  | 2.6065686 | 3.0 | 0.07992121  | 0.4424906  |
| gb:U48800.1 /DB_XREF=gi:1234824 /GEN=VEGf-B /FEA=FlmRNA /CNT=7 /TID=Mm.15807.2 /TIER=FL*STK=1 /UG=Mm.15807 /LL=22340 /DEF=Mus musculus vascular endothelial growth factor B precursor (VEGF-B) mRNA, complete cds. /PROD=vascular endothelial growth factor B precursor /FL=gb:U48800.1 gb:U48800.1                                                                | 3644.2334 | 921.23413 | 1713.7333 | 417.65958 | 3.3057415 | 2.0 | 0.08060011  | 0.4408729  |
| gb:AK010811.1 /DB_XREF=gi:12848197 /GEN=Phb /FEA=FlmRNA /CNT=260 /TID=Mm.2355.1 /TIER=Stack /STK=55 /UG=Mm.2355 /LL=18673 /UG_TITLE=RIKEN cDNA 2310015K15 gene /DEF=Mus musculus, Similar to RIKEN cDNA 2310015K15 gene, clone:241003008 hypothetical protein, full insert sequence. /FL=gb:NM_008831.1                                                            | 3106.8665 | 494.61856 | 2189.1    | 362.6443  | 2.5918353 | 3.0 | 0.080945365 | 0.43749043 |
| gb:NM_130881.1 /DB_XREF=gi:18700019 /GEN=MGC6885 /FEA=FlmRNA /CNT=43 /TID=Mm.12267.1 /TIER=FL*STK=2 /UG=Mm.12267 /LL=170715 /DEF=Mus musculus similar to poly(A)-binding protein, cytoplasmic 4 (inducible form) (MGC6885), mRNA. /PROD=similar to poly(A)-binding protein, cytoplasmic4 (inducible form) /FL=gb:NM_130881.1 gb:BC003283.1                         | 2363.5667 | 555.67523 | 1319.0    | 424.0053  | 2.5884504 | 3.0 | 0.081182934 | 0.43361238 |
| gb:NM_033882.1 /DB_XREF=gi:16716364 /GEN=Itm67 /FEA=FlmRNA /CNT=174 /TID=Mm.195498.1 /TIER=FL*Stack /STK=105 /UG=Mm.195498 /LL=20524 /DEF=Mus musculus transmembrane 4 superfamily member 7 (Tms4f7), mRNA. /PROD=transmembrane 4 superfamily member 7 /FL=gb:NM_053082.1 gb:BC003482.1                                                                            | 1432.9668 | 371.01614 | 723.1333  | 83.90889  | 3.2321563 | 2.0 | 0.083857775 | 0.44269103 |
| gb:NM_015816.1 /DB_XREF=gi:7657316 /GEN=Lsm4-pending /FEA=FlmRNA /CNT=133 /TID=Mm.14585.1 /TIER=FL*Stack /STK=52 /UG=Mm.14585 /LL=50783 /DEF=Mus musculus U6 snRNA-associated SM-like protein 4 (Lsm4-pending), mRNA. /PROD=U6 snRNA-associated SM-like protein 4 /FL=gb:NM_015816.1 gb:BC026747.1                                                                 | 2082.0667 | 419.71677 | 1322.8334 | 300.10544 | 2.5486553 | 3.0 | 0.08404149  | 0.43856132 |
| gb:NM_007940.1 /DB_XREF=gi:6679664 /FEA=FlmRNA /CNT=154 /TID=Mm.15295.1 /TIER=FL*Stack /STK=66 /UG=Mm.15295 /LL=13850 /DEF=Mus musculus epoxide hydrolase 2, cytoplasmic (Ephx2), mRNA. /PROD=epoxide hydrolase 2, cytoplasmic /FL=gb:NM_007940.1 gb:BC001587.1                                                                                                    | 6488.4336 | 906.62756 | 4647.6    | 401.75757 | 3.2152436 | 2.0 | 0.08463317  | 0.43663022 |
| gb:NM_009045.1 /DB_XREF=gi:6877708 /GEN=Hga /FEA=FlmRNA /CNT=107 /TID=Mm.28170.1 /TIER=FL*Stack /STK=9 /UG=Mm.28170 /LL=19697 /DEF=Mus musculus v-rel reticuloendotheliosis viral oncogene homolog A (vian) (RelA), mRNA. /PROD=avian reticuloendotheliosis viral (v-ret) oncogene homolog A /FL=gb:NM_009045.1 gb:M1909.1                                         | 1960.0332 | 383.5544  | 1213.4333 | 334.97433 | 2.5393877 | 3.0 | 0.08472489  | 0.43219215 |
| gb:NM_019503.1 /DB_XREF=gi:9506704 /GEN=Foxp1 /FEA=FlmRNA /CNT=7 /TID=Mm.1491.1 /TIER=FL*Stack /STK=2 /UG=Mm.1491 /LL=56188 /DEF=Mus musculus FXYD domain-containing ion transport regulator 1 (Fxyd1), mRNA. /PROD=FXYD domain-containing ion transport regulator 1 /FL=gb:AF089734.1 gb:NM_019503.1                                                              | 14909.3   | 2605.9375 | 10422.3   | 1641.9779 | 2.5232031 | 3.0 | 0.0859348   | 0.43349335 |
| gb:NM_011125.1 /DB_XREF=gi:1455117 /FEA=FlmRNA /CNT=67 /TID=Mm.6105.1 /TIER=FL*Stack /STK=32 /UG=Mm.6105 /LL=18830 /DEF=Mus musculus phospholipid transfer protein (Pltp), mRNA. /PROD=phospholipid transfer protein /FL=gb:BC003782.1                                                                                                                             | 2012.7001 | 384.84665 | 1234.1333 | 370.92523 | 2.5229409 | 3.0 | 0.085954584 | 0.42882836 |

|                                                                                                                                                                                                                                                                                                                                                                 |           |           |           |           |           |     |             |            |
|-----------------------------------------------------------------------------------------------------------------------------------------------------------------------------------------------------------------------------------------------------------------------------------------------------------------------------------------------------------------|-----------|-----------|-----------|-----------|-----------|-----|-------------|------------|
| gb U081551.1 DB_XREF=gi 8580066 GEN=Gap1 FEA=FLmRNA CNT=26 TID=Mm.589.1 TIER=FL STK=2 UG=Mm.589 ILL=14751 DEF=Mus musculus glucose phosphate isomerase 1 complex (Gp1), mRNA, /PROD=glucose phosphate isomerase 1 complex /FL=gb M14220.1 gb.NM_008155.1                                                                                                        | 8020.0    | 2118.5437 | 4423.6665 | 1272.875  | 2.5203187 | 3.0 | 0.08615266  | 0.42514464 |
| gb NM_024223.1 DB_XREF=gi 13195845 GEN=U61002 U63R FEA=FLmRNA CNT=180 TID=Mm.133825.1 TIER=FL STK=gb U63R ILL=14751 UG=Mm.133825 ILL=6833 DEF=Mus musculus RIKEN cDNA 061001023 (U63R), mRNA, /PROD=RIKEN cDNA 061001023 /FL=gb.NM_024223.1 gb.BC002096.1 gb.BC002093.1                                                                                         | 24228.334 | 3708.0068 | 16887.434 | 3422.41   | 2.519776  | 3.0 | 0.08619372  | 0.42077363 |
| gb NM_025529.1 DB_XREF=gi 13398997 GEN=U61002 U63R FEA=FLmRNA CNT=180 TID=Mm.133825.1 TIER=FL STK=gb U63R ILL=14751 UG=Mm.133825 ILL=6833 DEF=Mus musculus RIKEN cDNA 2310039H17 (U63R), mRNA, /PROD=RIKEN cDNA 2310039H17 /FL=gb.NM_025529.1                                                                                                                   | 3700.1335 | 1125.2148 | 1606.6998 | 191.09187 | 3.1769488 | 2.0 | 0.08642728  | 0.41742536 |
| gb AB054000.1 DB_XREF=gi 14017172 GEN=Cg10671-like FEA=FLmRNA CNT=35 TID=Mm.38758.1 TIER=FL STK=gb U63R ILL=14751 UG=Mm.38758 ILL=6880 DEF=Mus musculus Cg10671-like (mRNA), complete cds. /PROD=Cg10671-like /FL=gb AB054000.1                                                                                                                                 | 1886.9332 | 390.19482 | 1093.9    | 189.40694 | 3.1668425 | 2.0 | 0.086909845 | 0.41533756 |
| gb BC024621.1 DB_XREF=gi 19354257 FEA=FLmRNA CNT=209 TID=Mm.30064.1 TIER=FL+Stk STK=62 UG=Mm.30064 ILL=56486 UG=CE-Gabru ILL=56486 DEF=Mus musculus Gabru (GABRA4) protein, complete cds. /PROD=GABRA4 protein, complete cds. /FL=gb BC024621.1 gb.BC002126.1 gb.BC024621.1 gb.AF161587.1                                                                       | 10245.833 | 2222.5093 | 5753.9663 | 1048.8822 | 3.165773  | 2.0 | 0.086961135 | 0.4112537  |
| gb AF250139.1 DB_XREF=gi 7644381 FEA=FLmRNA CNT=159 TID=Mm.21549.1 TIER=FL STK=gb U63R ILL=14751 UG=Mm.21549 ILL=80888 UG=GENE=Cryac DEF=Mus musculus small stress protein-like protein HSP22 mRNA, complete cds. /PROD=small stress protein-like protein HSP22 /FL=gb BC011219.1 gb.NM_030704.1 gb.AF250139.1 gb.AF273453.1                                    | 2011.4    | 564.6096  | 1067.7667 | 328.73923 | 2.501638  | 3.0 | 0.08758011  | 0.40991104 |
| gb NM_019414.1 DB_XREF=gi 9507076 GEN=Selensbp2 FEA=FLmRNA CNT=105 TID=Mm.196558.1 TIER=FL STK=gb U63R ILL=14751 UG=Mm.196558 ILL=20342 DEF=Mus musculus selenin binding protein 2 (Selensbp2), mRNA, /PROD=selenin binding protein 2 /FL=gb NM_019414.1 gb.BC024106.1 gb.BC024106.1                                                                            | 4026.9336 | 494.99008 | 2721.0667 | 759.7327  | 2.4944136 | 3.0 | 0.088139914 | 0.40832165 |
| gb NM_024741.1 DB_XREF=gi 19320214 GEN=Mpr23 FEA=FLmRNA CNT=543 TID=Mm.41910.1 TIER=FL STK=gb U63R ILL=14751 UG=Mm.41910 ILL=64656 DEF=Mus musculus mitochondrial ribosomal protein S23 (Mpr23), mRNA, /PROD=mitochondrial ribosomal protein S23 /FL=gb NM_024741.1                                                                                             | 2356.1335 | 299.46243 | 1698.9668 | 349.67368 | 2.4724076 | 3.0 | 0.08987236  | 0.41214195 |
| gb AK013135.1 DB_XREF=gi 12850309 FEA=mRNA CNT=121 TID=Mm.141864.1 TIER=Stk STK=79 UG=Mm.141864 ILL=75620 UG=GENE=2810422J05R UG_TITLE=RIKEN cDNA 2810422J05 (U63R), mRNA, complete cds. /PROD=RIKEN cDNA 2810422J05 (U63R), mRNA, complete cds. /FL=gb AK013135.1 gb.BC024106.1 gb.BC024106.1                                                                  | 1843.7001 | 200.65141 | 1282.5333 | 344.3946  | 2.4385602 | 3.0 | 0.09261915  | 0.42049095 |
| Mus musculus REF332599 DEF=Mouse glyceroldehyde 3-phosphate dehydrogenase mRNA, complete cds /LEN=1228 [2..5..M..3 represent transcripts 5 prime, Middle, and 3 prime respectively                                                                                                                                                                              | 38164.9   | 9613.984  | 22698.932 | 5409.2744 | 2.4283547 | 3.0 | 0.093467414 | 0.42014065 |
| gb NM_025554.1 DB_XREF=gi 13398997 GEN=U61002 U63R FEA=FLmRNA CNT=180 TID=Mm.133825.1 TIER=FL STK=gb U63R ILL=14751 UG=Mm.133825 ILL=6833 DEF=Mus musculus RIKEN cDNA 2310039H17 (U63R), mRNA, complete cds. /PROD=RIKEN cDNA 2310039H17 /FL=gb NM_025554.1 gb.BC002096.1 gb.BC002093.1                                                                         | 3954.4001 | 400.78058 | 2848.5667 | 680.5213  | 2.4252167 | 3.0 | 0.09373015  | 0.41719106 |
| gb NM_017393.1 DB_XREF=gi 8393155 GEN=Cp FEA=FLmRNA CNT=134 TID=Mm.15243.1 TIER=FL STK=gb U63R ILL=14751 UG=Mm.15243 ILL=53895 DEF=Mus musculus caseinolytic protease, ATP-dependent, proteolytic subunit homolog (E. coli) (Cp), mRNA, /PROD=caseinolytic protease, ATP-dependent, proteolytic subunit homolog (E. coli) (Cp) /FL=gb NM_017393.1 gb.BC001998.1 | 1832.3666 | 349.50354 | 1118.9667 | 371.0742  | 2.4240038 | 3.0 | 0.09383194  | 0.41358933 |
| gb BC019408.1 DB_XREF=gi 13398997 GEN=U61002 U63R FEA=FLmRNA CNT=180 TID=Mm.133825.1 TIER=FL STK=gb U63R ILL=14751 UG=Mm.133825 ILL=6833 DEF=Mus musculus RIKEN cDNA 2310039H17 (U63R), mRNA, complete cds. /PROD=RIKEN cDNA 2310039H17 /FL=gb BC019408.1 gb.BC002096.1 gb.BC002093.1                                                                           | 1815.1333 | 453.52466 | 927.93335 | 445.7683  | 2.416461  | 3.0 | 0.09446801  | 0.4123892  |
| gb NM_015493.1 DB_XREF=gi 8393155 GEN=Cp FEA=FLmRNA CNT=134 TID=Mm.15243.1 TIER=FL STK=gb U63R ILL=14751 UG=Mm.15243 ILL=53895 DEF=Mus musculus caseinolytic protease, ATP-dependent, proteolytic subunit homolog (E. coli) (Cp), mRNA, /PROD=caseinolytic protease, ATP-dependent, proteolytic subunit homolog (E. coli) (Cp) /FL=gb NM_015493.1 gb.BC001998.1 | 1815.1333 | 453.52466 | 927.93335 | 445.7683  | 2.416461  | 3.0 | 0.09446801  | 0.4123892  |
| gb NM_018681.1 DB_XREF=gi 13994194 GEN=Ppp1a FEA=FLmRNA CNT=386 TID=Mm.1970.1 TIER=FL+Stk STK=206 UG=Mm.1970 ILL=19045 DEF=Mus musculus protein phosphatase 1, catalytic subunit, alpha isoform (Ppp1a), mRNA, /PROD=protein phosphatase 1,                                                                                                                     | 5705.3667 | 1490.353  | 3345.9333 | 800.3353  | 2.4157786 | 3.0 | 0.09452581  | 0.40871158 |
| gb AK009753.1 DB_XREF=gi 12844759 FEA=mRNA CNT=8 TID=Mm.34838.1 TIER=ConsE STK=3 UG=Mm.34838 ILL=76463 UG=GENE=231022J05R UG_TITLE=RIKEN cDNA 231022J05 (U63R), mRNA, complete cds. /PROD=RIKEN cDNA 231022J05 (U63R), mRNA, complete cds. /FL=gb AK009753.1 gb.BC024106.1 gb.BC024106.1                                                                        | 2922.1003 | 540.96954 | 1978.4667 | 35.65691  | 3.0147402 | 2.0 | 0.09466275  | 0.40544236 |
| Mus musculus REF332599 DEF=Mouse glyceroldehyde 3-phosphate dehydrogenase mRNA, complete cds /LEN=1228 [2..5..M..3 represent transcripts 5 prime, Middle, and 3 prime respectively                                                                                                                                                                              | 38164.9   | 9613.984  | 22698.932 | 5409.2744 | 2.4283547 | 3.0 | 0.093467414 | 0.42014065 |
| gb NM_025554.1 DB_XREF=gi 13398997 GEN=U61002 U63R FEA=FLmRNA CNT=180 TID=Mm.133825.1 TIER=FL STK=gb U63R ILL=14751 UG=Mm.133825 ILL=6833 DEF=Mus musculus RIKEN cDNA 2310039H17 (U63R), mRNA, complete cds. /PROD=RIKEN cDNA 2310039H17 /FL=gb NM_025554.1 gb.BC002096.1 gb.BC002093.1                                                                         | 3954.4001 | 400.78058 | 2848.5667 | 680.5213  | 2.4252167 | 3.0 | 0.09373015  | 0.41719106 |
| gb NM_017393.1 DB_XREF=gi 8393155 GEN=Cp FEA=FLmRNA CNT=134 TID=Mm.15243.1 TIER=FL STK=gb U63R ILL=14751 UG=Mm.15243 ILL=53895 DEF=Mus musculus caseinolytic protease, ATP-dependent, proteolytic subunit homolog (E. coli) (Cp), mRNA, /PROD=caseinolytic protease, ATP-dependent, proteolytic subunit homolog (E. coli) (Cp) /FL=gb NM_017393.1 gb.BC001998.1 | 1832.3666 | 349.50354 | 1118.9667 | 371.0742  | 2.4240038 | 3.0 | 0.09383194  | 0.41358933 |
| gb BC019408.1 DB_XREF=gi 13398997 GEN=U61002 U63R FEA=FLmRNA CNT=180 TID=Mm.133825.1 TIER=FL STK=gb U63R ILL=14751 UG=Mm.133825 ILL=6833 DEF=Mus musculus RIKEN cDNA 2310039H17 (U63R), mRNA, complete cds. /PROD=RIKEN cDNA 2310039H17 /FL=gb BC019408.1 gb.BC002096.1 gb.BC002093.1                                                                           | 1815.1333 | 453.52466 | 927.93335 | 445.7683  | 2.416461  | 3.0 | 0.09446801  | 0.4123892  |
| gb NM_015493.1 DB_XREF=gi 8393155 GEN=Cp FEA=FLmRNA CNT=134 TID=Mm.15243.1 TIER=FL STK=gb U63R ILL=14751 UG=Mm.15243 ILL=53895 DEF=Mus musculus caseinolytic protease, ATP-dependent, proteolytic subunit homolog (E. coli) (Cp), mRNA, /PROD=caseinolytic protease, ATP-dependent, proteolytic subunit homolog (E. coli) (Cp) /FL=gb NM_015493.1 gb.BC001998.1 | 1815.1333 | 453.52466 | 927.93335 | 445.7683  | 2.416461  | 3.0 | 0.09446801  | 0.4123892  |
| gb NM_018681.1 DB_XREF=gi 13994194 GEN=Ppp1a FEA=FLmRNA CNT=386 TID=Mm.1970.1 TIER=FL+Stk STK=206 UG=Mm.1970 ILL=19045 DEF=Mus musculus protein phosphatase 1, catalytic subunit, alpha isoform (Ppp1a), mRNA, /PROD=protein phosphatase 1,                                                                                                                     | 5705.3667 | 1490.353  | 3345.9333 | 800.3353  | 2.4157786 | 3.0 | 0.09452581  | 0.40871158 |
| gb AK009753.1 DB_XREF=gi 12844759 FEA=mRNA CNT=8 TID=Mm.34838.1 TIER=ConsE STK=3 UG=Mm.34838 ILL=76463 UG=GENE=231022J05R UG_TITLE=RIKEN cDNA 231022J05 (U63R), mRNA, complete cds. /PROD=RIKEN cDNA 231022J05 (U63R), mRNA, complete cds. /FL=gb AK009753.1 gb.BC024106.1 gb.BC024106.1                                                                        | 2922.1003 | 540.96954 | 1978.4667 | 35.65691  | 3.0147402 | 2.0 | 0.09466275  | 0.40544236 |
| Mus musculus REF332599 DEF=Mouse glyceroldehyde 3-phosphate dehydrogenase mRNA, complete cds /LEN=1228 [2..5..M..3 represent transcripts 5 prime, Middle, and 3 prime respectively                                                                                                                                                                              | 38164.9   | 9613.984  | 22698.932 | 5409.2744 | 2.4283547 | 3.0 | 0.093467414 | 0.42014065 |
| gb NM_025554.1 DB_XREF=gi 13398997 GEN=U61002 U63R FEA=FLmRNA CNT=180 TID=Mm.133825.1 TIER=FL STK=gb U63R ILL=14751 UG=Mm.133825 ILL=6833 DEF=Mus musculus RIKEN cDNA 2310039H17 (U63R), mRNA, complete cds. /PROD=RIKEN cDNA 2310039H17 /FL=gb NM_025554.1 gb.BC002096.1 gb.BC002093.1                                                                         | 3954.4001 | 400.78058 | 2848.5667 | 680.5213  | 2.4252167 | 3.0 | 0.09373015  | 0.41719106 |
| gb NM_017393.1 DB_XREF=gi 8393155 GEN=Cp FEA=FLmRNA CNT=134 TID=Mm.15243.1 TIER=FL STK=gb U63R ILL=14751 UG=Mm.15243 ILL=53895 DEF=Mus musculus caseinolytic protease, ATP-dependent, proteolytic subunit homolog (E. coli) (Cp), mRNA, /PROD=caseinolytic protease, ATP-dependent, proteolytic subunit homolog (E. coli) (Cp) /FL=gb NM_017393.1 gb.BC001998.1 | 1832.3666 | 349.50354 | 1118.9667 | 371.0742  | 2.4240038 | 3.0 | 0.09383194  | 0.41358933 |
| gb BC019408.1 DB_XREF=gi 13398997 GEN=U61002 U63R FEA=FLmRNA CNT=180 TID=Mm.133825.1 TIER=FL STK=gb U63R ILL=14751 UG=Mm.133825 ILL=6833 DEF=Mus musculus RIKEN cDNA 2310039H17 (U63R), mRNA, complete cds. /PROD=RIKEN cDNA 2310039H17 /FL=gb BC019408.1 gb.BC002096.1 gb.BC002093.1                                                                           | 1815.1333 | 453.52466 | 927.93335 | 445.7683  | 2.416461  | 3.0 | 0.09446801  | 0.4123892  |
| gb NM_015493.1 DB_XREF=gi 8393155 GEN=Cp FEA=FLmRNA CNT=134 TID=Mm.15243.1 TIER=FL STK=gb U63R ILL=14751 UG=Mm.15243 ILL=53895 DEF=Mus musculus caseinolytic protease, ATP-dependent, proteolytic subunit homolog (E. coli) (Cp), mRNA, /PROD=caseinolytic protease, ATP-dependent, proteolytic subunit homolog (E. coli) (Cp) /FL=gb NM_015493.1 gb.BC001998.1 | 1815.1333 | 453.52466 | 927.93335 | 445.7683  | 2.416461  | 3.0 | 0.09446801  | 0.4123892  |
| gb NM_018681.1 DB_XREF=gi 13994194 GEN=Ppp1a FEA=FLmRNA CNT=386 TID=Mm.1970.1 TIER=FL+Stk STK=206 UG=Mm.1970 ILL=19045 DEF=Mus musculus protein phosphatase 1, catalytic subunit, alpha isoform (Ppp1a), mRNA, /PROD=protein phosphatase 1,                                                                                                                     | 5705.3667 | 1490.353  | 3345.9333 | 800.3353  | 2.4157786 | 3.0 | 0.09452581  | 0.40871158 |
| gb AK009753.1 DB_XREF=gi 12844759 FEA=mRNA CNT=8 TID=Mm.34838.1 TIER=ConsE STK=3 UG=Mm.34838 ILL=76463 UG=GENE=231022J05R UG_TITLE=RIKEN cDNA 231022J05 (U63R), mRNA, complete cds. /PROD=RIKEN cDNA 231022J05 (U63R), mRNA, complete cds. /FL=gb AK009753.1 gb.BC024106.1 gb.BC024106.1                                                                        | 2922.1003 | 540.96954 | 1978.4667 | 35.65691  | 3.0147402 | 2.0 | 0.09466275  | 0.40544236 |
| Mus musculus REF332599 DEF=Mouse glyceroldehyde 3-phosphate dehydrogenase mRNA, complete cds /LEN=1228 [2..5..M..3 represent transcripts 5 prime, Middle, and 3 prime respectively                                                                                                                                                                              | 38164.9   | 9613.984  | 22698.932 | 5409.2744 | 2.4283547 | 3.0 | 0.093467414 | 0.42014065 |
| gb NM_025554.1 DB_XREF=gi 13398997 GEN=U61002 U63R FEA=FLmRNA CNT=180 TID=Mm.133825.1 TIER=FL STK=gb U63R ILL=14751 UG=Mm.133825 ILL=6833 DEF=Mus musculus RIKEN cDNA 2310039H17 (U63R), mRNA, complete cds. /PROD=RIKEN cDNA 2310039H17 /FL=gb NM_025554.1 gb.BC002096.1 gb.BC002093.1                                                                         | 3954.4001 | 400.78058 | 2848.5667 | 680.5213  | 2.4252167 | 3.0 | 0.09373015  | 0.41719106 |
| gb NM_017393.1 DB_XREF=gi 8393155 GEN=Cp FEA=FLmRNA CNT=134 TID=Mm.15243.1 TIER=FL STK=gb U63R ILL=14751 UG=Mm.15243 ILL=53895 DEF=Mus musculus caseinolytic protease, ATP-dependent, proteolytic subunit homolog (E. coli) (Cp), mRNA, /PROD=caseinolytic protease, ATP-dependent, proteolytic subunit homolog (E. coli) (Cp) /FL=gb NM_017393.1 gb.BC001998.1 | 1832.3666 | 349.50354 | 1118.9667 | 371.0742  | 2.4240038 | 3.0 | 0.09383194  | 0.41358933 |
| gb BC019408.1 DB_XREF=gi 13398997 GEN=U61002 U63R FEA=FLmRNA CNT=180 TID=Mm.133825.1 TIER=FL STK=gb U63R ILL=14751 UG=Mm.133825 ILL=6833 DEF=Mus musculus RIKEN cDNA 2310039H17 (U63R), mRNA, complete cds. /PROD=RIKEN cDNA 2310039H17 /FL=gb BC019408.1 gb.BC002096.1 gb.BC002093.1                                                                           | 1815.1333 | 453.52466 | 927.93335 | 445.7683  | 2.416461  | 3.0 | 0.09446801  | 0.4123892  |
| gb NM_015493.1 DB_XREF=gi 8393155 GEN=Cp FEA=FLmRNA CNT=134 TID=Mm.15243.1 TIER=FL STK=gb U63R ILL=14751 UG=Mm.15243 ILL=53895 DEF=Mus musculus caseinolytic protease, ATP-dependent, proteolytic subunit homolog (E. coli) (Cp), mRNA, /PROD=caseinolytic protease, ATP-dependent, proteolytic subunit homolog (E. coli) (Cp) /FL=gb NM_015493.1 gb.BC001998.1 | 1815.1333 | 453.52466 | 927.93335 | 445.7683  | 2.416461  | 3.0 | 0.09446801  | 0.4123892  |
| gb NM_018681.1 DB_XREF=gi 13994194 GEN=Ppp1a FEA=FLmRNA CNT=386 TID=Mm.1970.1 TIER=FL+Stk STK=206 UG=Mm.1970 ILL=19045 DEF=Mus musculus protein phosphatase 1, catalytic subunit, alpha isoform (Ppp1a), mRNA, /PROD=protein phosphatase 1,                                                                                                                     | 5705.3667 | 1490.353  | 3345.9333 | 800.3353  | 2.4157786 | 3.0 | 0.09452581  | 0.40871158 |
| gb AK009753.1 DB_XREF=gi 12844759 FEA=mRNA CNT=8 TID=Mm.34838.1 TIER=ConsE STK=3 UG=Mm.34838 ILL=76463 UG=GENE=231022J05R UG_TITLE=RIKEN cDNA 231022J05 (U63R), mRNA, complete cds. /PROD=RIKEN cDNA 231022J05 (U63R), mRNA, complete cds. /FL=gb AK009753.1 gb.BC024106.1 gb.BC024106.1                                                                        | 2922.1003 | 540.96954 | 1978.4667 | 35.65691  | 3.0147402 | 2.0 | 0.09466275  | 0.40544236 |
| Mus musculus REF332599 DEF=Mouse glyceroldehyde 3-phosphate dehydrogenase mRNA, complete cds /LEN=1228 [2..5..M..3 represent transcripts 5 prime, Middle, and 3 prime respectively                                                                                                                                                                              | 38164.9   | 9613.984  | 22698.932 | 5409.2744 | 2.4283547 | 3.0 | 0.093467414 | 0.42014065 |
| gb NM_025554.1 DB_XREF=gi 13398997 GEN=U61002 U63R FEA=FLmRNA CNT=180 TID=Mm.133825.1 TIER=FL STK=gb U63R ILL=14751 UG=Mm.133825 ILL=6833 DEF=Mus musculus RIKEN cDNA 2310039H17 (U63R), mRNA, complete cds. /PROD=RIKEN cDNA 2310039H17 /FL=gb NM_025554.1 gb.BC002096.1 gb.BC002093.1                                                                         | 3954.4001 | 400.78058 | 2848.5667 | 680.5213  | 2.4252167 | 3.0 | 0.09373015  | 0.41719106 |
| gb NM_017393.1 DB_XREF=gi 8393155 GEN=Cp FEA=FLmRNA CNT=134 TID=Mm.15243.1 TIER=FL STK=gb U63R ILL=14751 UG=Mm.15243 ILL=53895 DEF=Mus musculus caseinolytic protease, ATP-dependent, proteolytic subunit homolog (E. coli) (Cp), mRNA, /PROD=caseinolytic protease, ATP-dependent, proteolytic subunit homolog (E. coli) (Cp) /FL=gb NM_017393.1 gb.BC001998.1 | 1832.3666 | 349.50354 | 1118.9667 | 371.0742  | 2.4240038 | 3.0 | 0.09383194  | 0.41358933 |
| gb BC019408.1 DB_XREF=gi 13398997 GEN=U61002 U63R FEA=FLmRNA CNT=180 TID=Mm.133825.1 TIER=FL STK=gb U63R ILL=14751 UG=Mm.133825 ILL=6833 DEF=Mus musculus RIKEN cDNA 2310039H17 (U63R), mRNA, complete cds. /PROD=RIKEN cDNA 2310039H17 /FL=gb BC019408.1 gb.BC002096.1 gb.BC002093.1                                                                           | 1815.1333 | 453.52466 | 927.93335 | 445.7683  | 2.416461  | 3.0 | 0.09446801  | 0.4123892  |
| gb NM_015493.1 DB_XREF=gi 8393155 GEN=Cp FEA=FLmRNA CNT=134 TID=Mm.15243.1 TIER=FL STK=gb U63R ILL=14751 UG=Mm.15243 ILL=53895 DEF=Mus musculus caseinolytic protease, ATP-dependent, proteolytic subunit homolog (E. coli) (Cp), mRNA, /PROD=caseinolytic protease, ATP-dependent, proteolytic subunit homolog (E. coli) (Cp) /FL=gb NM_015493.1 gb.BC001998.1 | 1815.1333 | 453.52466 | 927.93335 | 445.7683  | 2.416461  | 3.0 | 0.09446801  | 0.4123892  |
| gb NM_018681.1 DB_XREF=gi 13994194 GEN=Ppp1a FEA=FLmRNA CNT=386 TID=Mm.1970.1 TIER=FL+Stk STK=206 UG=Mm.1970 ILL=19045 DEF=Mus musculus protein phosphatase 1, catalytic subunit, alpha isoform (Ppp1a), mRNA, /PROD=protein phosphatase 1,                                                                                                                     | 5705.3667 | 1490.353  | 3345.9333 | 800.3353  | 2.4157786 | 3.0 | 0.09452581  | 0.40871158 |
| gb AK009753.1 DB_XREF=gi 12844759 FEA=mRNA CNT=8 TID=Mm.34838.1 TIER=ConsE STK=3 UG=Mm.34838 ILL=76463 UG=GENE=231022J05R UG_TITLE=RIKEN cDNA 231022J05 (U63R), mRNA, complete cds. /PROD=RIKEN cDNA 231022J05 (U63R), mRNA, complete cds. /FL=gb AK009753.1 gb.BC024106.1 gb.BC024106.1                                                                        | 2922.1003 | 540.96954 | 1978.4667 | 35.65691  | 3.0147402 | 2.0 | 0.09466275  | 0.40544236 |
| Mus musculus REF332599 DEF=Mouse glyceroldehyde 3-phosphate dehydrogenase mRNA, complete cds /LEN=1228 [2..5..M..3 represent transcripts 5 prime, Middle, and 3 prime respectively                                                                                                                                                                              | 38164.9   | 9613.984  | 22698.    |           |           |     |             |            |

|                                                                                                                                                                                                                                                                                                                                                                                                                                             |           |           |           |           |           |     |             |            |
|---------------------------------------------------------------------------------------------------------------------------------------------------------------------------------------------------------------------------------------------------------------------------------------------------------------------------------------------------------------------------------------------------------------------------------------------|-----------|-----------|-----------|-----------|-----------|-----|-------------|------------|
| gbNM_007964.1/DB_XREF=gi6679706/GEN=Ew5/FEA=FLmRNA/CNT=132/TID=Mm.35796.1/TIER=FL+Stack/STK=43<br>/UG=Mm.35796.1/DB_XREF=gi6679706/GEN=Ew5/FEA=FLmRNA/CNT=132/TID=Mm.35796.1/TIER=FL+Stack/STK=43<br>/FL-gb.U53586.1 gb-NM_007964.1                                                                                                                                                                                                         | 792.3667  | 377.52588 | 1390.3002 | 92.49189  | 2.6644602 | 2.0 | 0.11670841  | 0.38395375 |
| gbNM_010438.1/DB_XREF=gi8754205/GEN=HK1/FEA=FLmRNA/CNT=117/TID=Mm.196605.1/TIER=FL+Stack/STK=2/UG=Mm.196605<br>/FL-gb.U53586.1 gb-NM_010438.1                                                                                                                                                                                                                                                                                               | 1239.2334 | 485.96017 | 504.16666 | 328.2567  | 2.1710267 | 3.0 | 0.118341856 | 0.38652664 |
| gbBC001527.1/DB_XREF=gi13938071/FEA=FLmRNA/CNT=413/TID=Mm.27818.1/TIER=FL+Stack/STK=17/UG=Mm.27818.1/LL=13629<br>/UG_GENE=Eef2/DEF=Mus musculus, eukaryotic translation elongation factor 2, clone MGC:6761 IMAGE:3600352, mRNA, complete cds.<br>/PROD=eukaryotic translation elongation factor 2 /FL-gb.BC007152.1                                                                                                                        | 14758.233 | 2760.599  | 10545.767 | 1951.1    | 2.1583295 | 3.0 | 0.11976393  | 0.3883773  |
| gbNM_001572.1/DB_XREF=gi6671649/GEN=Ct1ga/FEA=FLmRNA/CNT=119/TID=Mm.370.1/TIER=FL+Stack/STK=46/UG=Mm.370<br>/LL=12259/DEF=Mus musculus complement component 1, q subcomponent, alpha polypeptide (C1qa), mRNA, /PROD=complement component 1, q subcomponent, alpha polypeptide /FL-gb.BC002686.1 gb-NM_001572.1                                                                                                                             | 1808.0332 | 915.5151  | 389.43335 | 199.11038 | 2.6225247 | 2.0 | 0.11982115  | 0.38580713 |
| gbBC0027166.1/DB_XREF=gi20073307/FEA=FLmRNA/CNT=223/TID=Mm.219670.1/TIER=Stack/STK=22/UG=Mm.219670/DEF=Mus<br>musculus, Similar to eukaryotic translation initiation factor 4 gamma, 1, clone IMAGE:4950789, mRNA, partial cds. /PROD=Similar to eukaryotic<br>translation initiation factor 4 gamma, 1                                                                                                                                     | 1914.3334 | 535.31134 | 1075.0    | 149.95964 | 2.6150708 | 2.0 | 0.120386615 | 0.38489804 |
| gbNM_033617.1/DB_XREF=gi15991794/GEN=AtP6v0b/FEA=FLmRNA/CNT=145/TID=Mm.3479.1/TIER=FL+Stack/STK=70<br>/UG=Mm.3479.1/LL=114143/DEF=Mus musculus ATPase, H+ transporting, lysosomal 21kDa, V0 subunit B (AtP6v0b), mRNA, /PROD=ATPase,<br>H+ transporting, lysosomal 21kDa, V0subunit B /FL-gb.NM_033617.1 gb-AB060654.1 gb-AF356006.1                                                                                                        | 2499.8333 | 531.6897  | 1691.5333 | 374.72598 | 2.1523097 | 2.0 | 0.12044529  | 0.38239273 |
| gbU25533.1/DB_XREF=gi1028496/GEN=TMP/FEA=FLmRNA/CNT=216/TID=Mm.30024.1/TIER=FL+Stack/STK=83/UG=Mm.30024<br>/LL=13730/DEF=Mus musculus tumor-associated membrane protein (TMP) mRNA, complete cds. /PROD=tumor-associated membrane protein<br>/FL-gb.U25533.1 gb-NM_010128.1                                                                                                                                                                 | 3414.7334 | 885.31415 | 5353.6997 | 1285.9819 | 2.1510766 | 3.0 | 0.120585434 | 0.3801791  |
| gbAK019319.1/DB_XREF=gi12859466/GEN=ApoE/FEA=mRNA/CNT=1/TID=Mm.138866.2/TIER=ConsEnd/STK=0/UG=Mm.138866<br>/LL=11816/UG_TITLE=apolipoprotein E /DEF=Mus musculus adult mice hippocampus cDNA, RIKEN full-length enriched library,<br>clone:2900019G12/apolipoprotein E, full insert sequence                                                                                                                                                | 15604.3   | 4270.9517 | 9267.634  | 2806.9692 | 2.147504  | 3.0 | 0.12099254  | 0.3788318  |
| gbNM_008512.1/DB_XREF=gi6678719/GEN=LtP1/FEA=FLmRNA/CNT=182/TID=Mm.7221.1/TIER=FL+Stack/STK=49/UG=Mm.7221<br>/LL=16971/DEF=Mus musculus low density lipoprotein receptor-related protein 1 (Lrp1), mRNA, /PROD=low density lipoprotein receptor-related<br>protein1 /FL-gb-AF36720.1 gb-NM_008512.1                                                                                                                                         | 2616.4001 | 712.1777  | 1542.8334 | 493.1368  | 2.1465883 | 3.0 | 0.12109717  | 0.37656245 |
| gb-NM_011918.1/DB_XREF=gi6756042/GEN=Ldb3/FEA=FLmRNA/CNT=97/TID=Mm.29733.1/TIER=FL+Stack/STK=71/UG=Mm.29733<br>/LL=24131/DEF=Mus musculus LIM domain binding 3 (Ldb3), mRNA, /PROD=LIM domain binding 3 /FL-gb.AF114379.2 gb-NM_011918.1                                                                                                                                                                                                    | 14779.5   | 2508.98   | 10855.767 | 719.2049  | 2.6038458 | 2.0 | 0.12124525  | 0.3744581  |
| gbNM_009208.1/DB_XREF=gi6678022/GEN=SC4a3/FEA=FLmRNA/CNT=45/TID=Mm.5053.1/TIER=FL+Stack/STK=23/UG=Mm.5053<br>/LL=20536/DEF=Mus musculus solute carrier family 4 (anion exchanger), member 3 (SC4a3), mRNA, /PROD=solute carrier family 4 (anion<br>exchanger) member 3 /FL-gb.M28383.1 gb-NM_009208.1                                                                                                                                       | 2166.0    | 661.7367  | 1131.3334 | 191.27336 | 2.601667  | 2.0 | 0.12141292  | 0.37244233 |
| gbAF225808.1/DB_XREF=gi6717123/DB_XREF=gi15991794/GEN=AtP6v0b/FEA=FLmRNA/CNT=145/TID=Mm.3479.1/TIER=FL+Stack/STK=70<br>/UG=Mm.3479.1/LL=114143/DEF=Mus musculus ATPase, H+ transporting, lysosomal 21kDa, V0 subunit B (AtP6v0b), mRNA, /PROD=ATPase,<br>H+ transporting, lysosomal 21kDa, V0subunit B /FL-gb.NM_033617.1 gb-AB060654.1 gb-AF356006.1                                                                                       | 2209.2    | 1237.3901 | 4263.6665 | 585.0482  | 2.599816  | 2.0 | 0.1215556   | 0.37037745 |
| gbNM_010240.1/DB_XREF=gi6753913/GEN=Fb1/FEA=FLmRNA/CNT=109/TID=Mm.7500.1/TIER=FL+Stack/STK=24/UG=Mm.7500<br>/LL=14325/DEF=Mus musculus ferritin light chain 1 (Fb1), mRNA, /PROD=ferritin light chain 1 /FL-gb.U04716.1 gb-NM_010240.1                                                                                                                                                                                                      | 5862.8335 | 943.54614 | 4308.5664 | 432.8185  | 2.5933146 | 2.0 | 0.122058645 | 0.36943084 |
| gbNM_019840.1/DB_XREF=gi14971094/FEA=FLmRNA/CNT=5/TID=Mm.2400.2/TIER=FL+Stack/STK=2/UG=Mm.2400.2/LL=14779<br>/UG_GENE=Gp4/DEF=Mus musculus phospholipid hydroperoxide glutathione peroxidase, mRNA, complete cds, alternatively spliced.<br>/PROD=phospholipid hydroperoxide glutathione peroxidase /FL-gb-AF24027.1                                                                                                                        | 23738.666 | 5152.416  | 15873.466 | 1223.0314 | 2.5725076 | 2.0 | 0.12368836  | 0.3718842  |
| gbBC006753.1/DB_XREF=gi13879545/FEA=FLmRNA/CNT=190/TID=Mm.3634.1/TIER=FL+Stack/STK=71/UG=Mm.3634/DEF=Mus<br>musculus, clone MGC:11670 IMAGE:3709076, mRNA, complete cds. /PROD=Unknown (protein for MGC:11670) /FL-gb.U028317.1<br>gb-BC006753.1                                                                                                                                                                                            | 1298.4333 | 74.20587  | 789.0334  | 335.8784  | 2.5650096 | 2.0 | 0.12428313  | 0.37121406 |
| gbNM_021538.1/DB_XREF=gi10946971/GEN=Cope/FEA=FLmRNA/CNT=222/TID=Mm.28668.1/TIER=FL+Stack/STK=93<br>/UG=Mm.28668.1/LL=59042/DEF=Mus musculus coatomer protein complex, subunit epsilon (Cope), mRNA, /PROD=coatomer protein complex,<br>subunit epsilon /FL-gb-AB033837.1 gb-BC009170.1 gb-NM_021538.1                                                                                                                                      | 2886.7668 | 464.41937 | 2023.2333 | 537.0535  | 2.1065724 | 3.0 | 0.12577623  | 0.3732184  |
| gbNM_009349.1/DB_XREF=gi10946971/GEN=Cope/FEA=FLmRNA/CNT=222/TID=Mm.28668.1/TIER=FL+Stack/STK=93/UG=Mm.299<br>/LL=1743/DEF=Mus musculus thioester S-methyltransferase (Tent), mRNA, /PROD=thioester S-methyltransferase /FL-gb.M88694.1<br>gb-NM_009349.1 gb-BC013518.1                                                                                                                                                                     | 3501.0999 | 800.25867 | 2259.0667 | 277.9903  | 2.539362  | 2.0 | 0.12634811  | 0.37248078 |
| gbAK003715.1/DB_XREF=gi12634551/GEN=D11Wsu686/FEA=mRNA/CNT=48/TID=Mm.24855.1/TIER=Stack/STK=29<br>/UG=Mm.24855.1/LL=28084/UG_TITLE=DNA segment, Chr 11, Wayne State University 68, expressed /DEF=Mus musculus 18 days embryo<br>whole body cDNA, RIKEN full-length enriched library, clone:1110014N10.DNA segment, Chr 11, Wayne State University 68, expressed, full<br>insert sequence                                                   | 2237.9    | 257.32095 | 1627.3334 | 434.5673  | 2.0939682 | 3.0 | 0.12729448  | 0.37284964 |
| gb-NM_009077.1/DB_XREF=gi6677770/GEN=Rpl18/FEA=FLmRNA/CNT=2/TID=Mm.41923.1/TIER=FL+Stack/STK=2/UG=Mm.41923<br>/LL=19899/DEF=Mus musculus ribosomal protein L18 (Rpl18), mRNA, /PROD=ribosomal protein L18 /FL-gb.NM_009077.1 gb-U04128.1                                                                                                                                                                                                    | 12883.8   | 2866.7754 | 8467.8    | 986.7063  | 2.5228121 | 2.0 | 0.12770614  | 0.3716576  |
| gbAK017523.1/DB_XREF=gi12658802/FEA=mRNA/CNT=39/TID=Mm.29092.2/TIER=ConsEnd/STK=1/UG=Mm.29092.2/LL=70510<br>/UG_GENE=5730408C10R1K/UG_TITLE=RIKEN cDNA 5730408C10 gene /DEF=Mus musculus 8 days embryo whole body cDNA, RIKEN full-<br>length enriched library, clone:5730408C10.C3HC4 type (RING finger) Zinc finger containing protein, full insert sequence                                                                              | 1612.5    | 484.06375 | 910.66675 | 328.9321  | 2.0770903 | 3.0 | 0.12936181  | 0.3740781  |
| gbNM_020255.1/DB_XREF=gi9937979/GEN=SGand1/FEA=FLmRNA/CNT=74/TID=Mm.29477.1/TIER=FL+Stack/STK=34<br>/UG=Mm.29477.1/LL=19018/DEF=Mus musculus SCAN domain-containing 1 (Scand1), mRNA, /PROD=paroxysmal proliferative activated<br>receptor, gamma, coactivator 1 /FL-gb-BC010724.1 gb-NM_020255.1 gb-AF106473.1 gb-AF220501.1                                                                                                               | 1806.9667 | 392.72913 | 1233.5    | 58.524418 | 2.5015333 | 2.0 | 0.1294824   | 0.37205702 |
| gb-NM_017379.1/DB_XREF=gi8394492/GEN=Tuba8/FEA=FLmRNA/CNT=31/TID=Mm.32884.1/TIER=FL+Stack/STK=9/UG=Mm.32884<br>/LL=53857/DEF=Mus musculus tubulin, alpha 8 (Tuba8), mRNA, /PROD=tubulin, alpha 8 /FL-gb-BC017631.1 gb-NM_017379.1                                                                                                                                                                                                           | 3518.2668 | 731.5148  | 2430.4001 | 541.90027 | 2.069757  | 2.0 | 0.13027246  | 0.37197295 |
| gbNM_008906.1/DB_XREF=gi6679436/GEN=Ppgb/FEA=FLmRNA/CNT=327/TID=Mm.7046.1/TIER=FL+Stack/STK=187/UG=Mm.7046<br>/LL=19025/DEF=Mus musculus protective protein for beta-galactosidase (Ppgb), mRNA, /PROD=protective protein for beta-galactosidase<br>/FL-gb-BC016534.1 gb-U056261.1 gb-NM_008906.1                                                                                                                                           | 3347.4336 | 684.5403  | 2355.2668 | 469.90833 | 2.069697  | 3.0 | 0.13027996  | 0.3696694  |
| gbBC025650.1/DB_XREF=gi10946971/GEN=Cope/FEA=FLmRNA/CNT=222/TID=Mm.28668.1/TIER=FL+Stack/STK=93/UG=Mm.299<br>/LL=1743/DEF=Mus musculus thioester S-methyltransferase (Tent), mRNA, /PROD=thioester S-methyltransferase /FL-gb.M88694.1<br>gb-NM_009349.1 gb-BC013518.1                                                                                                                                                                      | 6629.7007 | 1163.0481 | 4860.3335 | 919.62646 | 2.0669303 | 3.0 | 0.13062552  | 0.36834773 |
| gbNM_009149.1/DB_XREF=gi6677904/GEN=Sele/FEA=FLmRNA/CNT=216/TID=Mm.488.1/TIER=FL+Stack/STK=57/UG=Mm.488<br>/LL=20340/DEF=Mus musculus selectin, endothelial cell, ligand (Sele), mRNA, /PROD=selectin, endothelial cell, ligand /FL-gb-NM_009149.1<br>gb-BC021306.1                                                                                                                                                                         | 4186.1665 | 1061.3314 | 2741.0332 | 597.75024 | 2.054902  | 3.0 | 0.13214059  | 0.37031993 |
| gbAK003436.1/DB_XREF=gi12634106/GEN=Pn0b8/FEA=FLmRNA/CNT=285/TID=Mm.35812.1/TIER=FL+Stack/STK=17/UG=Mm.35812<br>/LL=57296/UG_TITLE=proteasome (prosome, macropain) 26S subunit, non-ATPase, 8 /DEF=Mus musculus 18 days embryo whole body<br>cDNA, RIKEN full-length enriched library, clone:1110004L21.proteasome (prosome, macropain) 26S subunit, non-ATPase, 8, full insert<br>sequence, /FL-gb-BC005717.1 gb-BC004075.1 gb-NM_026451.1 | 3733.7    | 823.347   | 2583.7334 | 512.53284 | 2.0537407 | 3.0 | 0.13228798  | 0.36845854 |
| gbBC028256.1/DB_XREF=gi2389524/FEA=mRNA/CNT=19/TID=Mm.45357.2/TIER=ConsEnd/STK=0/UG=Mm.45357.2/LL=59079<br>/UG_GENE=ErbB2ip/DEF=Mus musculus, Similar to erbB2 interacting protein, clone IMAGE:4988135, mRNA, partial cds. /PROD=Similar to<br>erbB2 interacting protein                                                                                                                                                                   | 1193.3667 | 589.4717  | 2155.9001 | 562.5233  | 2.0460775 | 3.0 | 0.1332654   | 0.36891764 |
| gbNM_008968.1/DB_XREF=gi6679534/GEN=Ppgis/FEA=FLmRNA/CNT=85/TID=Mm.2339.1/TIER=FL+Stack/STK=38/UG=Mm.2339<br>/LL=19223/DEF=Mus musculus prostaglandin I2 (prostaglandin) synthase (Pgis), mRNA, /PROD=prostaglandin I2 (prostaglandin) synthase<br>/FL-gb-AB001607.1 gb-NM_008968.1                                                                                                                                                         | 3961.1667 | 958.07043 | 2481.9668 | 417.30057 | 2.4517064 | 2.0 | 0.13377887  | 0.3680946  |
| gb-NM_008896.1/DB_XREF=gi6679416/GEN=Pon2/FEA=FLmRNA/CNT=70/TID=Mm.22681.1/TIER=FL+Stack/STK=27/UG=Mm.22681<br>/LL=18990/DEF=Mus musculus paraoxonase 2 (Pon2), mRNA, /PROD=paraoxonase 2 /FL-gb-L48514.1 gb-NM_008896.1                                                                                                                                                                                                                    | 1238.8    | 514.217   | 1998.3667 | 390.5902  | 2.0373657 | 3.0 | 0.13438699  | 0.36754033 |
| gbNM_025933.1/DB_XREF=gi13385425/GEN=2010110M21R1K/FEA=FLmRNA/CNT=99/TID=Mm.29353.1/TIER=FL+Stack/STK=31<br>/UG=Mm.29353.1/LL=67044/DEF=Mus musculus RIKEN cDNA 2010110M21 (2010110M21R1k), mRNA, /PROD=RIKEN cDNA<br>2010110M21 /FL-gb-NM_025933.1 gb-BC021471.1                                                                                                                                                                           | 9029.7    | 1679.2811 | 6378.6333 | 848.9092  | 2.440287  | 2.0 | 0.13479145  | 0.366439   |
| gb-BC013670.1/DB_XREF=gi15489119/FEA=FLmRNA/CNT=368/TID=Mm.30074.1/TIER=FL+Stack/STK=142/UG=Mm.30074/DEF=Mus<br>musculus, clone MGC:19042 IMAGE:4188988, mRNA, complete cds. /PROD=Unknown (protein for MGC:19042) /FL-gb-BC013670.1                                                                                                                                                                                                        | 9587.733  | 1456.2542 | 6396.4336 | 2294.6082 | 2.0338852 | 3.0 | 0.1348382   | 0.36438417 |
| gbNM_011892.1/DB_XREF=gi6755487/GEN=SGcg/FEA=FLmRNA/CNT=12/TID=Mm.7217.3/TIER=FL+Stack/STK=2/UG=Mm.7217/3<br>/LL=24053/DEF=Mus musculus sarcoglycan, gamma (35kD dystrophin-associated glycoprotein) (Sgog), mRNA, /PROD=sarcoglycan, gamma<br>(35kD dystrophin-associated glycoprotein) /FL-gb-NM_011892.1 gb-AB024922.1                                                                                                                   | 3929.0    | 206.34653 | 2650.0    | 888.793   | 2.4278996 | 2.0 | 0.13590199  | 0.36508584 |
| gbNM_008749.1/DB_XREF=gi6679157/GEN=Nucb/FEA=FLmRNA/CNT=332/TID=Mm.2283.1/TIER=FL+Stack/STK=64/UG=Mm.2283<br>/LL=8220/DEF=Mus musculus nucleobindin (Nucb), mRNA, /PROD=nucleobindin /FL-gb-NM_008749.1 gb-M58623.1                                                                                                                                                                                                                         | 2056.5332 | 457.68692 | 1335.7333 | 414.98807 | 2.020778  | 3.0 | 0.13655357  | 0.36467835 |
| gbBC024681.1/DB_XREF=gi10071462/FEA=FLmRNA/CNT=174/TID=Mm.2381.1/TIER=FL+Stack/STK=138/UG=Mm.2381<br>/DEF=Mus musculus, Similar to LGN protein, clone MGC:31563 IMAGE:4504055, mRNA, complete cds. /PROD=Similar to LGN protein<br>/FL-gb-BC024681.1                                                                                                                                                                                        | 1239.2333 | 239.45042 | 746.6333  | 348.11758 | 2.0193365 | 3.0 | 0.1367438   | 0.3630508  |
| gbBC021463.1/DB_XREF=gi18204796/FEA=FLmRNA/CNT=46/TID=Mm.29372.1/TIER=FL+Stack/STK=27/UG=Mm.29372/LL=67675<br>/UG_GENE=0610039D01R1K/DEF=Mus musculus, Similar to RIKEN cDNA 0610039D01 gene, clone MGC:29169 IMAGE:5053934, mRNA,<br>complete cds. /PROD=Similar to RIKEN cDNA 0610039D01 gene /FL-gb-BC021463.1                                                                                                                           | 2120.3    | 536.66815 | 1357.9    | 103.11544 | 2.4163818 | 2.0 | 0.13694601  | 0.36147377 |
| gbBC027021.1/DB_XREF=gi20071695/FEA=FLmRNA/CNT=11/TID=Mm.2857.1/TIER=FL+Stack/STK=38/UG=Mm.2857.1/LL=88463<br>/UG_GENE=111000611R1K/DEF=Mus musculus, RIKEN cDNA 111000611 gene, clone MGC:36524 IMAGE:5374870, mRNA, complete cds.<br>/PROD=RIKEN cDNA 111000611 gene /FL-gb-BC027021.1                                                                                                                                                    | 2301.3    | 584.0858  | 1471.8667 | 408.19916 | 2.0160584 | 3.0 | 0.13717754  | 0.35999194 |
| gb-NM_023133.1/DB_XREF=gi12963510/GEN=Rps19/FEA=FLmRNA/CNT=72/TID=Mm.103634.1/TIER=FL+Stack/STK=17<br>/UG=Mm.103634.1/LL=20085/DEF=Mus musculus ribosomal protein S19 (Rps19), mRNA, /PROD=ribosomal protein S19 /FL-gb-NM_023133.1                                                                                                                                                                                                         | 12766.899 | 2580.3882 | 8981.033  | 886.1002  | 2.4034498 | 2.0 | 0.13813154  | 0.36041218 |
| gbNM_023341.1/DB_XREF=gi12963648/GEN=4632432J1R1K/FEA=FLmRNA/CNT=129/TID=Mm.28337.1/TIER=FL+Stack/STK=58<br>/UG=Mm.28337.1/LL=67428/DEF=Mus musculus RIKEN cDNA 4632432J16 gene (4632432J16R1k), mRNA, /PROD=RIKEN cDNA<br>4632432J16 /FL-gb-NM_023341.1                                                                                                                                                                                    | 7496.6665 | 1431.8107 | 5438.7334 | 389.1163  | 2.402333  | 2.0 | 0.13823459  | 0.35862002 |
| gbBC006701.1/DB_XREF=gi13879559/FEA=FLmRNA/CNT=160/TID=Mm.24353.1/TIER=FL+Stack/STK=69/UG=Mm.24353.1/LL=56418<br>/UG_GENE=Yk6-pending /DEF=Mus musculus, prnylated SNARE protein, clone MGC:5770 IMAGE:3257673, mRNA, complete cds.<br>/PROD=prnylated SNARE protein /FL-gb-AF076956.1 gb-NM_019661.1 gb-BC006701.1                                                                                                                         | 1423.2999 | 314.74496 | 936.23334 | 278.5027  | 2.0073311 | 3.0 | 0.13834026  | 0.35685498 |
| gbBM24557.2/DB_XREF=gi17880842/DB_XREF=K0726D05.3/CLONE=K0726D05/FEA=mRNA/CNT=10/TID=Mm.204648.1<br>/TIER=ConsEnd/STK=7/UG=Mm.204648/UG_TITLE=Mus musculus adult male kidney cDNA, RIKEN full-length enriched library,<br>clone:0610010005 lymphocyte antigen 6 complex, locus E, full insert sequence                                                                                                                                      | 7878.033  | 2055.934  | 5033.4663 | 1347.9259 | 2.0044116 | 3.0 | 0.13877152  | 0.35594502 |
| gbBC025450.1/DB_XREF=gi1934374/FEA=mRNA/CNT=171/TID=Mm.24463.1/TIER=Stack/STK=124/UG=Mm.24463.1/LL=70049<br>/UG_GENE=261004482R1K/UG_TITLE=RIKEN cDNA 2610044822 gene /DEF=Mus musculus, clone IMAGE:5345597, mRNA,<br>complete cds. /PROD=Unknown (protein for MGC:19042) /FL-gb-BC013670.1                                                                                                                                                | 2023.8334 | 822.1557  | 3157.9336 | 534.31946 | 2.0033257 | 3.0 | 0.1388778   | 0.3542164  |
| gbBC00562.1/DB_XREF=gi13542843/FEA=FLmRNA/CNT=178/TID=Mm.29097.1/TIER=FL+Stack/STK=27/UG=Mm.29097<br>/LL=110829/UG_GENE=Lims1/DEF=Mus musculus, RIKEN cDNA 4921524A02 gene, clone MGC:11585 IMAGE:3711611, mRNA, complete<br>cds. /PROD=RIKEN cDNA 4921524A02 gene /FL-gb-NM_026148.1 gb-BC00562.1                                                                                                                                          | 3386.3333 | 739.64    | 2136.9666 | 790.78    | 1.9985387 | 3.0 | 0.13952343  | 0.35387507 |
| gbNM_007752.1/DB_XREF=gi6680996/GEN=Cp/FEA=FLmRNA/CNT=332/TID=Mm.13787.1/TIER=FL+Stack/STK=43/UG=Mm.13787<br>/LL=12870/DEF=Mus musculus ceruloplasmin (Cp), mRNA, /PROD=ceruloplasmin /FL-gb-U49430.1 gb-NM_007752.1                                                                                                                                                                                                                        | 4454.0    | 455.7452  | 2840.6335 | 1083.2803 | 2.3777456 | 2.0 | 0.14053063  | 0.35444948 |
| gb-NM_019966.1/DB_XREF=gi9910433/GEN=Mlycd/FEA=FLmRNA/CNT=83/TID=Mm.20260.1/TIER=FL+Stack/STK=3/UG=Mm.20260<br>/LL=56690/DEF=Mus musculus malonyl-CoA decarboxylase (Mlycd), mRNA, /PROD=malonyl-CoA decarboxylase /FL-gb-NM_019966.1                                                                                                                                                                                                       | 1357.1666 | 386.15103 | 839.89996 | 232.48802 | 1.9877075 | 2.0 | 0.14099741  | 0.353662   |
| gbBC027285.1/DB_XREF=gi20071022/FEA=FLmRNA/CNT=65/TID=Mm.175681.1/TIER=FL+Stack/STK=42/UG=Mm.175681<br>/LL=68713/UG_GENE=1110036C17R1K/DEF=Mus musculus, Similar to RIKEN cDNA 1110036C17 gene, clone MGC:27862<br>IMAGE:332212, mRNA, complete cds. /PROD=Similar to RIKEN cDNA 1110036C17 gene /FL-gb-BC027285.1                                                                                                                          | 1052.9667 | 369.74796 | 534.93335 | 259.89047 | 1.9853188 | 3.0 | 0.14132495  | 0.35253587 |
| gbAK019396.1/DB_XREF=gi12859581/FEA=mRNA/CNT=68/TID=Mm.44226.2/TIER=Stack/STK=38/UG=Mm.44226.2/LL=68066<br>/UG_GENE=3010027G13R1K/UG_TITLE=RIKEN cDNA 3010027G13 gene /DEF=Mus musculus 12 days embryo head cDNA, R                                                                                                                                                                                                                         |           |           |           |           |           |     |             |            |

|                                                                                                                                                                                                                                                                                                                                                                                       |           |           |           |           |           |     |            |            |
|---------------------------------------------------------------------------------------------------------------------------------------------------------------------------------------------------------------------------------------------------------------------------------------------------------------------------------------------------------------------------------------|-----------|-----------|-----------|-----------|-----------|-----|------------|------------|
| gbNM_016763.1/DB_XREF=gi:7949046/GEN=Hsd17b10/FEA=FLmRNA/CNT=195/7/ID=Mm.6994.1/7/IER=FL+Stack/STK=101/UG=Mm.6994/LL=15108/DEF=Mus musculus hydroxysteroid (17-beta) dehydrogenase 10 (Hsd17b10), mRNA, /PROD=hydroxysteroid (17-beta) dehydrogenase 10 /FL=gb:AF233585.1 gb:NM_016763.1 gb:UgNM_013620.1                                                                             | 7606.8335 | 1108.047  | 5424.6333 | 1571.2577 | 1.9658613 | 3.0 | 0.14402652 | 0.35344887 |
| gbNM_009739.1/DB_XREF=gi:7331587/GEN=Hsd17b10/FEA=FLmRNA/CNT=129/7/ID=Mm.8903.1/7/IER=FL+Stack/STK=88/UG=Mm.8903/LL=12041/DEF=Mus musculus branched chain ketoacid dehydrogenase kinase (Bckdk), mRNA, /PROD=branched chain keto acid dehydrogenase kinase /FL=gb:AF043070.1 gb:NM_009739.1                                                                                           | 1531.5    | 364.39032 | 1027.8334 | 89.51983  | 2.3249393 | 2.0 | 0.14564368 | 0.35549587 |
| gbNM_030561.1/DB_XREF=gi:13385411/GEN=BC004004/FEA=FLmRNA/CNT=146/7/ID=Mm.25308.1/7/IER=FL+Stack/STK=78/UG=Mm.25308/LL=80748/DEF=Mus musculus hypothetical protein, MGC:7550 (BC004004), mRNA, /PROD=hypothetical protein MGC7550 /FL=gb:BC004004.1 gb:NM_030561.1                                                                                                                    | 7795.6333 | 1556.6836 | 5527.3667 | 672.38983 | 2.3169024 | 2.0 | 0.14644434 | 0.35553867 |
| gbNM_013602.7/DB_XREF=gi:7305284/GEN=MIT/FEA=FLmRNA/CNT=145/7/ID=Mm.219629.1/7/IER=FL+Stack/STK=36/UG=Mm.219629/LL=17748/DEF=Mus musculus mitogen-activated protein kinase 1 (Mit1), mRNA, /PROD=mitogen-activated protein kinase 1 /FL=gb:U03620.1                                                                                                                                   | 11612.833 | 3314.8948 | 7316.1665 | 1936.7217 | 1.9384388 | 3.0 | 0.14793773 | 0.35725388 |
| gbU13884.1/DB_XREF=gi:124782/GEN=Hsd17b10/FEA=FLmRNA/CNT=37/ID=Mm.444.2/7/IER=FL+Stack/STK=1/UG=Mm.444/LL=15901/DEF=Mus musculus transcription factor IIdB (IIdB), mRNA, complete cds, /PROD=IIdB /FL=gb:U43884.1                                                                                                                                                                     | 1394.6    | 364.95178 | 889.7     | 273.0372  | 1.9186989 | 3.0 | 0.15083033 | 0.36231202 |
| gbBC026751.1/DB_XREF=gi:20071192/FEA=FLmRNA/CNT=36/7/ID=Mm.41486.1/7/IER=FL+Stack/STK=1/UG=Mm.41486/LL=70103/UG_GENE=2700001K05Rf/DEF=Mus musculus, Similar to putative cyclin G1 interacting protein, clone MGC:3153902, mRNA, complete cds, /PROD=Similar to putative cyclin G1 interacting protein /FL=gb:BC026751.1                                                               | 1355.3667 | 312.11258 | 905.0999  | 262.02222 | 1.9137493 | 3.0 | 0.15156595 | 0.36216286 |
| gbBC025071.1/DB_XREF=gi:19264072/FEA=FLmRNA/CNT=132/7/ID=Mm.2875.2/7/IER=FL+Stack/STK=58/UG=Mm.2875/LL=66855/UG_GENE=1100001J13Rf/DEF=Mus musculus, Similar to RIKEN cDNA 1100001J13 gene, clone MGC:36794 IMAGE:3498003, mRNA, complete cds, /PROD=Similar to RIKEN cDNA 1100001J13 gene /FL=gb:BC025071.1                                                                           | 2475.1667 | 329.6616  | 1750.5    | 568.4756  | 1.9100156 | 3.0 | 0.15212366 | 0.36159238 |
| gbNM_024227.1/DB_XREF=gi:13195649/GEN=1110015G04Rf/FEA=FLmRNA/CNT=160/7/ID=Mm.27332.1/7/IER=FL+Stack/STK=102/UG=Mm.27332/LL=68611/DEF=Mus musculus RIKEN cDNA 1110015G04 gene (1110015G04Rf), mRNA, /PROD=RIKEN cDNA 1110015G04 /FL=gb:NM_024227.1 gb:BC002293.1 gb:BC005797.1                                                                                                        | 4231.767  | 809.5277  | 3110.2998 | 290.3462  | 2.2585943 | 2.0 | 0.15243916 | 0.3604551  |
| gbBC024610.1/DB_XREF=gi:19354311/FEA=FLmRNA/CNT=39/7/ID=Mm.46628.2/7/IER=FL+Stack/STK=21/UG=Mm.46628/LL=22344/UG_GENE=Vedf1/DEF=Mus musculus, vascular endothelial zinc finger 1, clone MGC:28455 IMAGE:4159675, mRNA, complete cds, /PROD=vascular endothelial zinc finger 1 /FL=gb:BC024610.1                                                                                       | 1260.9    | 340.7898  | 789.93335 | 122.7772  | 2.251978  | 2.0 | 0.15314065 | 0.3602376  |
| gbAK011360.1/DB_XREF=gi:12847432/FEA=mRNA/CNT=64/7/ID=Mm.142187.1/7/IER=Stack/STK=24/UG=Mm.142187/LL=69202/UG_GENE=2610009E16Rf/UG_TITLE=RIKEN cDNA 2610009E16 gene/DEF=Mus musculus 10 days embryo whole body cDNA, RIKEN full-length enriched library, clone:2610009E16.homolog to PARATHYMOXIN (ZINC-BINDING 11.5 KDA PROTEIN), full insert sequence.                              | 3908.8    | 1215.2148 | 2384.5    | 673.47577 | 1.9002765 | 3.0 | 0.15358968 | 0.35943154 |
| gbAK007208.1/DB_XREF=gi:12840620/GEN=Cappb1/FEA=mRNA/CNT=27/7/ID=Mm.2945.3/7/IER=ConsEnd/STK=1/UG=Mm.2945/LL=12345/UG_TITLE=capping protein beta 1 /DEF=Mus musculus adult male testis cDNA, RIKEN full-length enriched library, clone:1700120C01.capping protein beta 1, full insert sequence.                                                                                       | 3347.5    | 1118.8156 | 1890.4668 | 725.1011  | 1.892879  | 3.0 | 0.15471424 | 0.36020648 |
| gbBC026137.1/DB_XREF=gi:20071192/FEA=FLmRNA/CNT=36/7/ID=Mm.2875.2/7/IER=FL+Stack/STK=58/UG=Mm.2875/LL=66855/UG_GENE=2700001K05Rf/DEF=Mus musculus, Similar to putative cyclin G1 interacting protein, clone MGC:3153902, mRNA, complete cds, /PROD=Unknown (protein for MGC:41260)                                                                                                    | 2423.5    | 500.8672  | 1659.0332 | 496.18042 | 1.8780776 | 3.0 | 0.15699328 | 0.36364773 |
| gbBC007140.1/DB_XREF=gi:1938048/FEA=FLmRNA/CNT=129/7/ID=Mm.219663.2/7/IER=FL+Stack/STK=107/UG=Mm.219663/LL=14114/UG_GENE=Fbln1/DEF=Mus musculus, Similar to fibulin 1, clone MGC:6128 IMAGE:3495754, mRNA, complete cds, /PROD=Similar to fibulin 1 /FL=gb:BC007140.1                                                                                                                 | 2261.4333 | 914.7857  | 1040.7667 | 275.78848 | 2.2128296 | 2.0 | 0.15738344 | 0.3627009  |
| gbNM_019932.1/DB_XREF=gi:9910485/GEN=PH4/FEA=FLmRNA/CNT=47/7/ID=Mm.23905.1/7/IER=FL+Stack/STK=28/UG=Mm.23905/LL=56744/DEF=Mus musculus platelet factor 4 (PF4), mRNA, /PROD=platelet factor 4 /FL=gb:AB01491.2 gb:NM_019932.1                                                                                                                                                         | 3736.8665 | 923.7606  | 2606.4666 | 488.46692 | 1.8736765 | 3.0 | 0.15767846 | 0.36154556 |
| gbNM_010312.1/DB_XREF=gi:13337390/GEN=Gnb2/FEA=FLmRNA/CNT=387/7/ID=Mm.30141.1/7/IER=FL+Stack/STK=141/UG=Mm.30141/LL=14693/DEF=Mus musculus guanine nucleotide binding protein, beta 2 (Gnb2), mRNA, /PROD=guanine nucleotide-binding protein, beta-2subunit /FL=gb:U34960.1 gb:NM_010312.1                                                                                            | 1156.7001 | 482.16302 | 477.7333  | 227.77388 | 2.2053285 | 2.0 | 0.15821478 | 0.3609523  |
| gbNM_011797.1/DB_XREF=gi:8753263/GEN=Car14/FEA=FLmRNA/CNT=541/7/ID=Mm.34556.1/7/IER=FL+Stack/STK=16/UG=Mm.34556/LL=123831/DEF=Mus musculus carbonic anhydrase 14 (Car14), mRNA, /PROD=carbonic anhydrase 14 /FL=gb:NM_011797.1 gb:AB005450.1                                                                                                                                          | 1273.2001 | 392.50107 | 750.2666  | 284.58118 | 1.8682411 | 3.0 | 0.15852948 | 0.3598619  |
| gbNM_008081.1/DB_XREF=gi:12835132/FEA=mRNA/CNT=542/7/ID=Mm.29458.1/7/IER=Stack/STK=17/UG=Mm.29458/LL=68748/UG_GENE=1110034G11Rf/UG_TITLE=RIKEN cDNA 1110034G11 gene/DEF=Mus musculus 18 days embryo whole body cDNA, RIKEN full-length enriched library, clone:1110034G11.related to CG12379 PROTEIN, full insert sequence.                                                           | 2279.8    | 659.10315 | 1438.1333 | 63.327145 | 2.2016687 | 2.0 | 0.15862256 | 0.3582818  |
| gbU16321.1/DB_XREF=gi:1185384/FEA=FLmRNA/CNT=80/7/ID=Mm.4269.2/7/IER=FL+Stack/STK=55/UG=Mm.4269/LL=21413/UG_GENE=Tcf4/DEF=Mus musculus basic transcription factor MITF-2A mRNA, complete cds, /PROD=MITF-2A protein /FL=gb:U16321.1 gb:BC014293.1                                                                                                                                     | 1709.9332 | 440.62988 | 1114.2999 | 333.23102 | 1.8675402 | 3.0 | 0.15865374 | 0.3565782  |
| gbAF332085.1/DB_XREF=gi:14193736/GEN=Rad21/FEA=FLmRNA/CNT=282/7/ID=Mm.182628.1/7/IER=FL+Stack/STK=2/UG=Mm.182628/LL=18597/DEF=Mus musculus strain ISS Rad21 (Rad21), mRNA, complete cds, /PROD=Rad21 /FL=gb:AF332086.1 gb:AF332085.1                                                                                                                                                  | 823.76666 | 335.08176 | 380.09998 | 241.96138 | 1.8592664 | 3.0 | 0.15994632 | 0.35771248 |
| gbNM_133739.1/DB_XREF=gi:19526937/GEN=2310075C12Rf/FEA=FLmRNA/CNT=150/7/ID=Mm.148516.1/7/IER=FL+Stack/STK=52/UG=Mm.148516/LL=71929/DEF=Mus musculus RIKEN cDNA 2310075C12 gene (2310075C12Rf), mRNA, /PROD=RIKEN cDNA 2310075C12 /FL=gb:NM_133739.1                                                                                                                                   | 797.3333  | 489.41528 | 1390.7999 | 263.78073 | 1.8488518 | 3.0 | 0.16160896 | 0.35965917 |
| gbBC004829.1/DB_XREF=gi:13435995/FEA=FLmRNA/CNT=206/7/ID=Mm.2079.1/7/IER=FL+Stack/STK=57/UG=Mm.2079/LL=20973/UG_GENE=Syngr2/DEF=Mus musculus, synaptogyrin 2, clone MGC:6483 IMAGE:2646657, mRNA, complete cds, /PROD=synaptogyrin 2 /FL=gb:AF364049.1 gb:BC004829.1 gb:AF11985.1 gb:NM_009304.1                                                                                      | 1566.0868 | 384.5148  | 1058.5    | 310.58392 | 1.8486891 | 3.0 | 0.1616351  | 0.3579626  |
| gbNM_026468.1/DB_XREF=gi:13385699/GEN=Atf7/FEA=FLmRNA/CNT=334/7/ID=Mm.10314.1/7/IER=FL+Stack/STK=154/UG=Mm.10314/LL=67942/DEF=Mus musculus ATP synthase, H+ transporting, mitochondrial F0 complex, subunit c (subunit 9), isoform 2 (Atf5g2), mRNA, /PROD=ATP synthase, H+ transporting, mitochondrial F0 complex, subunit c (subunit 9), isoform 2 /FL=gb:NM_026468.1 gb:BC006813.1 | 13885.966 | 3905.741  | 8379.966  | 1993.4896 | 2.1748064 | 2.0 | 0.16166022 | 0.3562803  |
| gbNM_019719.1/DB_XREF=gi:9789906/GEN=Stub1/FEA=FLmRNA/CNT=166/7/ID=Mm.29000.1/7/IER=FL+Stack/STK=80/UG=Mm.29000/LL=56424/DEF=Mus musculus STP1 homology and U-Box containing protein 1 (Stub1), mRNA, /PROD=STP1 homology and U-Box containing protein 1 /FL=gb:NM_019719.1 gb:AF129086.1                                                                                             | 4352.6333 | 730.2896  | 3130.9333 | 883.24316 | 1.8463746 | 3.0 | 0.16200738 | 0.35532054 |
| gbBC026760.1/DB_XREF=gi:20071192/FEA=FLmRNA/CNT=36/7/ID=Mm.2875.2/7/IER=FL+Stack/STK=58/UG=Mm.2875/LL=66855/UG_GENE=Myfn1/DEF=Mus musculus, clone MGC:25573 IMAGE:3990090, mRNA, complete cds, /PROD=Unknown (protein for MGC:25573) /FL=gb:BC026760.1                                                                                                                                | 10349.899 | 2328.1802 | 7504.567  | 1345.0183 | 1.8329034 | 3.0 | 0.16419399 | 0.35838494 |
| gbNM_010347.1/DB_XREF=gi:8679089/GEN=Nos3/FEA=FLmRNA/CNT=49/7/ID=Mm.12837.1/7/IER=FL+Stack/STK=25/UG=Mm.12837/LL=18127/DEF=Mus musculus nitric oxide synthase 3, endothelial cell (Nos3), mRNA, /PROD=nitric oxide synthase 3, endothelial cell /FL=gb:U53142.1 gb:NM_008713.1                                                                                                        | 1535.2333 | 382.03305 | 1020.6995 | 303.48578 | 1.8265747 | 3.0 | 0.16523309 | 0.3589274  |
| gbNM_010347.1/DB_XREF=gi:8679089/GEN=Nos3/FEA=FLmRNA/CNT=49/7/ID=Mm.12837.1/7/IER=FL+Stack/STK=25/UG=Mm.12837/LL=18127/DEF=Mus musculus nitric oxide synthase 3, endothelial cell (Nos3), mRNA, /PROD=nitric oxide synthase 3, endothelial cell /FL=gb:U53142.1 gb:NM_008713.1                                                                                                        | 1535.2333 | 382.03305 | 1020.6995 | 303.48578 | 1.8265747 | 3.0 | 0.16523309 | 0.3589274  |
| gbNM_010347.1/DB_XREF=gi:8679089/GEN=Nos3/FEA=FLmRNA/CNT=49/7/ID=Mm.12837.1/7/IER=FL+Stack/STK=25/UG=Mm.12837/LL=18127/DEF=Mus musculus nitric oxide synthase 3, endothelial cell (Nos3), mRNA, /PROD=nitric oxide synthase 3, endothelial cell /FL=gb:U53142.1 gb:NM_008713.1                                                                                                        | 1535.2333 | 382.03305 | 1020.6995 | 303.48578 | 1.8265747 | 3.0 | 0.16523309 | 0.3589274  |
| gbNM_010347.1/DB_XREF=gi:8679089/GEN=Nos3/FEA=FLmRNA/CNT=49/7/ID=Mm.12837.1/7/IER=FL+Stack/STK=25/UG=Mm.12837/LL=18127/DEF=Mus musculus nitric oxide synthase 3, endothelial cell (Nos3), mRNA, /PROD=nitric oxide synthase 3, endothelial cell /FL=gb:U53142.1 gb:NM_008713.1                                                                                                        | 1535.2333 | 382.03305 | 1020.6995 | 303.48578 | 1.8265747 | 3.0 | 0.16523309 | 0.3589274  |
| gbNM_010347.1/DB_XREF=gi:8679089/GEN=Nos3/FEA=FLmRNA/CNT=49/7/ID=Mm.12837.1/7/IER=FL+Stack/STK=25/UG=Mm.12837/LL=18127/DEF=Mus musculus nitric oxide synthase 3, endothelial cell (Nos3), mRNA, /PROD=nitric oxide synthase 3, endothelial cell /FL=gb:U53142.1 gb:NM_008713.1                                                                                                        | 1535.2333 | 382.03305 | 1020.6995 | 303.48578 | 1.8265747 | 3.0 | 0.16523309 | 0.3589274  |
| gbNM_010347.1/DB_XREF=gi:8679089/GEN=Nos3/FEA=FLmRNA/CNT=49/7/ID=Mm.12837.1/7/IER=FL+Stack/STK=25/UG=Mm.12837/LL=18127/DEF=Mus musculus nitric oxide synthase 3, endothelial cell (Nos3), mRNA, /PROD=nitric oxide synthase 3, endothelial cell /FL=gb:U53142.1 gb:NM_008713.1                                                                                                        | 1535.2333 | 382.03305 | 1020.6995 | 303.48578 | 1.8265747 | 3.0 | 0.16523309 | 0.3589274  |
| gbNM_010347.1/DB_XREF=gi:8679089/GEN=Nos3/FEA=FLmRNA/CNT=49/7/ID=Mm.12837.1/7/IER=FL+Stack/STK=25/UG=Mm.12837/LL=18127/DEF=Mus musculus nitric oxide synthase 3, endothelial cell (Nos3), mRNA, /PROD=nitric oxide synthase 3, endothelial cell /FL=gb:U53142.1 gb:NM_008713.1                                                                                                        | 1535.2333 | 382.03305 | 1020.6995 | 303.48578 | 1.8265747 | 3.0 | 0.16523309 | 0.3589274  |
| gbNM_010347.1/DB_XREF=gi:8679089/GEN=Nos3/FEA=FLmRNA/CNT=49/7/ID=Mm.12837.1/7/IER=FL+Stack/STK=25/UG=Mm.12837/LL=18127/DEF=Mus musculus nitric oxide synthase 3, endothelial cell (Nos3), mRNA, /PROD=nitric oxide synthase 3, endothelial cell /FL=gb:U53142.1 gb:NM_008713.1                                                                                                        | 1535.2333 | 382.03305 | 1020.6995 | 303.48578 | 1.8265747 | 3.0 | 0.16523309 | 0.3589274  |
| gbNM_010347.1/DB_XREF=gi:8679089/GEN=Nos3/FEA=FLmRNA/CNT=49/7/ID=Mm.12837.1/7/IER=FL+Stack/STK=25/UG=Mm.12837/LL=18127/DEF=Mus musculus nitric oxide synthase 3, endothelial cell (Nos3), mRNA, /PROD=nitric oxide synthase 3, endothelial cell /FL=gb:U53142.1 gb:NM_008713.1                                                                                                        | 1535.2333 | 382.03305 | 1020.6995 | 303.48578 | 1.8265747 | 3.0 | 0.16523309 | 0.3589274  |
| gbNM_010347.1/DB_XREF=gi:8679089/GEN=Nos3/FEA=FLmRNA/CNT=49/7/ID=Mm.12837.1/7/IER=FL+Stack/STK=25/UG=Mm.12837/LL=18127/DEF=Mus musculus nitric oxide synthase 3, endothelial cell (Nos3), mRNA, /PROD=nitric oxide synthase 3, endothelial cell /FL=gb:U53142.1 gb:NM_008713.1                                                                                                        | 1535.2333 | 382.03305 | 1020.6995 | 303.48578 | 1.8265747 | 3.0 | 0.16523309 | 0.3589274  |
| gbNM_010347.1/DB_XREF=gi:8679089/GEN=Nos3/FEA=FLmRNA/CNT=49/7/ID=Mm.12837.1/7/IER=FL+Stack/STK=25/UG=Mm.12837/LL=18127/DEF=Mus musculus nitric oxide synthase 3, endothelial cell (Nos3), mRNA, /PROD=nitric oxide synthase 3, endothelial cell /FL=gb:U53142.1 gb:NM_008713.1                                                                                                        | 1535.2333 | 382.03305 | 1020.6995 | 303.48578 | 1.8265747 | 3.0 | 0.16523309 | 0.3589274  |
| gbNM_010347.1/DB_XREF=gi:8679089/GEN=Nos3/FEA=FLmRNA/CNT=49/7/ID=Mm.12837.1/7/IER=FL+Stack/STK=25/UG=Mm.12837/LL=18127/DEF=Mus musculus nitric oxide synthase 3, endothelial cell (Nos3), mRNA, /PROD=nitric oxide synthase 3, endothelial cell /FL=gb:U53142.1 gb:NM_008713.1                                                                                                        | 1535.2333 | 382.03305 | 1020.6995 | 303.48578 | 1.8265747 | 3.0 | 0.16523309 | 0.3589274  |
| gbNM_010347.1/DB_XREF=gi:8679089/GEN=Nos3/FEA=FLmRNA/CNT=49/7/ID=Mm.12837.1/7/IER=FL+Stack/STK=25/UG=Mm.12837/LL=18127/DEF=Mus musculus nitric oxide synthase 3, endothelial cell (Nos3), mRNA, /PROD=nitric oxide synthase 3, endothelial cell /FL=gb:U53142.1 gb:NM_008713.1                                                                                                        | 1535.2333 | 382.03305 | 1020.6995 | 303.48578 | 1.8265747 | 3.0 | 0.16523309 | 0.3589274  |
| gbNM_010347.1/DB_XREF=gi:8679089/GEN=Nos3/FEA=FLmRNA/CNT=49/7/ID=Mm.12837.1/7/IER=FL+Stack/STK=25/UG=Mm.12837/LL=18127/DEF=Mus musculus nitric oxide synthase 3, endothelial cell (Nos3), mRNA, /PROD=nitric oxide synthase 3, endothelial cell /FL=gb:U53142.1 gb:NM_008713.1                                                                                                        | 1535.2333 | 382.03305 | 1020.6995 | 303.48578 | 1.8265747 | 3.0 | 0.16523309 | 0.3589274  |
| gbNM_010347.1/DB_XREF=gi:8679089/GEN=Nos3/FEA=FLmRNA/CNT=49/7/ID=Mm.12837.1/7/IER=FL+Stack/STK=25/UG=Mm.12837/LL=18127/DEF=Mus musculus nitric oxide synthase 3, endothelial cell (Nos3), mRNA, /PROD=nitric oxide synthase 3, endothelial cell /FL=gb:U53142.1 gb:NM_008713.1                                                                                                        | 1535.2333 | 382.03305 | 1020.6995 | 303.48578 | 1.8265747 | 3.0 | 0.16523309 | 0.3589274  |
| gbNM_010347.1/DB_XREF=gi:8679089/GEN=Nos3/FEA=FLmRNA/CNT=49/7/ID=Mm.12837.1/7/IER=FL+Stack/STK=25/UG=Mm.12837/LL=18127/DEF=Mus musculus nitric oxide synthase 3, endothelial cell (Nos3), mRNA, /PROD=nitric oxide synthase 3, endothelial cell /FL=gb:U53142.1 gb:NM_008713.1                                                                                                        | 1535.2333 | 382.03305 | 1020.6995 | 303.48578 | 1.8265747 | 3.0 | 0.16523309 | 0.3589274  |
| gbNM_010347.1/DB_XREF=gi:8679089/GEN=Nos3/FEA=FLmRNA/CNT=49/7/ID=Mm.12837.1/7/IER=FL+Stack/STK=25/UG=Mm.12837/LL=18127/DEF=Mus musculus nitric oxide synthase 3, endothelial cell (Nos3), mRNA, /PROD=nitric oxide synthase 3, endothelial cell /FL=gb:U53142.1 gb:NM_008713.1                                                                                                        | 1535.2333 | 382.03305 | 1020.6995 | 303.48578 | 1.8265747 | 3.0 | 0.16523309 | 0.3589274  |
| gbNM_010347.1/DB_XREF=gi:8679089/GEN=Nos3/FEA=FLmRNA/CNT=49/7/ID=Mm.12837.1/7/IER=FL+Stack/STK=25/UG=Mm.12837/LL=18127/DEF=Mus musculus nitric oxide synthase 3, endothelial cell (Nos3), mRNA, /PROD=nitric oxide synthase 3, endothelial cell /FL=gb:U53142.1 gb:NM_008713.1                                                                                                        | 1535.2333 | 382.03305 | 1020.6995 | 303.48578 | 1.8265747 | 3.0 | 0.16523309 | 0.3589274  |
| gbNM_010347.1/DB_XREF=gi:8679089/GEN=Nos3/FEA=FLmRNA/CNT=49/7/ID=Mm.12837.1/7/IER=FL+Stack/STK=25/UG=Mm.12837/LL=18127/DEF=Mus musculus nitric oxide synthase 3, endothelial cell (Nos3), mRNA, /PROD=nitric oxide synthase 3, endothelial cell /FL=gb:U53142.1 gb:NM_008713.1                                                                                                        | 1535.2333 | 382.03305 | 1020.6995 | 303.48578 | 1.8265747 | 3.0 | 0.16523309 | 0.3589274  |
| gbNM_010347.1/DB_XREF=gi:8679089/GEN=Nos3/FEA=FLmRNA/CNT=49/7/ID=Mm.12837.1/7/IER=FL+Stack/STK=25/UG=Mm.12837/LL=18127/DEF=Mus musculus nitric oxide synthase 3, endothelial cell (Nos3), mRNA, /PROD=nitric oxide synthase 3, endothelial cell /FL=gb:U53142.1 gb:NM_008713.1                                                                                                        | 1535.2333 | 382.03305 | 1020.6995 | 303.48578 | 1.8265747 | 3.0 | 0.16523309 | 0.3589274  |
| gbNM_010347.1/DB_XREF=gi:8679089/GEN=Nos3/FEA=FLmRNA/CNT=49/7/ID=Mm.12837.1/7/IER=FL+Stack/STK=25/UG=Mm.12837/LL=18127/DEF=Mus musculus nitric oxide synthase 3, endothelial cell (Nos3), mRNA, /PROD=nitric oxide synthase 3, endothelial cell /FL=gb:U53142.1 gb:NM_008713.1                                                                                                        | 1535.2333 | 382.03305 | 1020.6995 | 303.48578 | 1.8265747 | 3.0 | 0.16523309 | 0.3589274  |
| gbNM_010347.1/DB_XREF=gi:8679089/GEN=Nos3/FEA=FLmRNA/CNT=49/7/ID=Mm.12837.1/7/IER=FL+Stack/STK=25/UG=Mm.12837/LL=18127/DEF=Mus musculus nitric oxide synthase 3, endothelial cell (Nos3), mRNA, /PROD=nit                                                                                                                                                                             |           |           |           |           |           |     |            |            |

[illegible]

|                                                                                                                                                                                                                                                                                                                                                                                                                               |           |           |           |           |           |     |            |            |
|-------------------------------------------------------------------------------------------------------------------------------------------------------------------------------------------------------------------------------------------------------------------------------------------------------------------------------------------------------------------------------------------------------------------------------|-----------|-----------|-----------|-----------|-----------|-----|------------|------------|
| gbNM_011072.1/DB_XREF=gi 8755039/ GEN=Prl1/FEA=FLmRNA/CNT=168/7/ID=Mm.2647.1/7/IER=FL+Stack/STK=26/UG=Mm.2647/LL=18643/DEF=Mus musculus profilin 1 (Prl1), mRNA, /PROD=profilin 1 /FL=gb:BC002080.1 gbNM_011072.1                                                                                                                                                                                                             | 1880.2666 | 486.36215 | 1148.6666 | 624.1759  | 1.6013907 | 3.0 | 0.20760737 | 0.33782706 |
| gbBC019131.1/DB_XREF=gi 7512319/FEA=FLmRNA/CNT=897/ID=Mm.7694.1/7/IER=FL+Stack/STK=38/UG=Mm.7694/LL=68864/LL=13894/DEF=Mus musculus, clone MGC-29165 IMAGE 5036749, mRNA, complete cds. /PROD=Unknown (protein for MGC-29165) /FL=gb:BC019131.1                                                                                                                                                                               | 1780.6666 | 942.588   | 2963.0667 | 868.2394  | 1.5980754 | 3.0 | 0.20831712 | 0.33777133 |
| gbNM_025650.1/DB_XREF=gi 13385111/GEN=07/1008090R/FEA=FLmRNA/CNT=200/7/ID=Mm.43162.1/7/IER=FL+Stack/STK=100/UG=Mm.43162/LL=66594/DEF=Mus musculus RIKEN cDNA 071008090R (071008090R), mRNA, /PROD=RIKEN cDNA 071008090R /FL=gbNM_025650.1                                                                                                                                                                                     | 17802.533 | 6000.5195 | 10966.7   | 2426.666  | 1.8292425 | 2.0 | 0.20886318 | 0.33745155 |
| gbNM_023119.1/DB_XREF=gi 12963490/GEN=Eno1/FEA=FLmRNA/CNT=270/7/ID=Mm.90587.1/7/IER=FL+Stack/STK=14/UG=Mm.90587/LL=13806/DEF=Mus musculus enolase 1, alpha non-neuron (Eno1), mRNA, /PROD=enolase 1, alpha non-neuron (FL=gb:BC024844.1 gbNM_023119.1) /FL=gb:BC024844.1 gbNM_023119.1                                                                                                                                        | 6644.033  | 2078.6033 | 4233.8335 | 1600.5298 | 1.5912825 | 3.0 | 0.20977983 | 0.33773065 |
| gbBC016534.1/DB_XREF=gi 16741429/FEA=FLmRNA/CNT=237/ID=Mm.144899.2/7/IER=FL+Stack/STK=8/UG=Mm.144899.2/LL=56409/UG_GENE=Nud3/DEF=Mus musculus, nudix (nucleotide diphosphate linked moiety X)-type motif 3, clone MGC-28998 IMAGE 2615904, mRNA, complete cds. /PROD=nudix (nucleotide diphosphate linked moiety X)-type motif 3 /FL=gb:BC016534.1                                                                            | 4924.8003 | 1210.6158 | 3560.6335 | 466.26718 | 1.8213212 | 3.0 | 0.21015003 | 0.33713117 |
| gbNM_007751.1/DB_XREF=gi 6880994/GEN=Cox8b/FEA=FLmRNA/CNT=27/7/ID=Mm.3841.1/7/IER=FL+Stack/STK=18/UG=Mm.3841/LL=12869/DEF=Mus musculus cytochrome c oxidase, subunit VIIIb (Cox8b), mRNA, /PROD=cytochrome c oxidase, subunit VIIIb /FL=gb:U15541.1 gbNM_007751.1                                                                                                                                                             | 30768.635 | 9435.1045 | 20126.934 | 3702.992  | 1.8185111 | 2.0 | 0.21060908 | 0.33667788 |
| gbAJ002587.1/DB_XREF=gi 2598561/FEA=mRNA/CNT=14/7/ID=Mm.918.2/7/IER=ConsEnd/STK=0/UG=Mm.918/LL=14828/UG_GENE=Hspas/DEF=Mus musculus mRNA for Hsp, /PROD=Hsp                                                                                                                                                                                                                                                                   | 3538.3337 | 1849.5023 | 5593.8667 | 464.41464 | 1.8179885 | 2.0 | 0.2106946  | 0.3356328  |
| gbNM_017608.1/DB_XREF=gi 7949157/FEA=FLmRNA/CNT=113/7/ID=Mm.12914.1/7/IER=FL+Stack/STK=54/UG=Mm.12914/LL=53376/DEF=Mus musculus ubiquitin specific protease 2 (Usp2), mRNA, /PROD=ubiquitin-specific protease 2 /FL=gbNM_016808.1 gbNM_017608.1                                                                                                                                                                               | 3728.6335 | 542.1459  | 2686.4001 | 1003.7924 | 1.5823406 | 3.0 | 0.21172279 | 0.33609143 |
| gbNM_007899.1/DB_XREF=gi 6681256/GEN=Ecm1/FEA=FLmRNA/CNT=126/7/ID=Mm.3433.1/7/IER=FL+Stack/STK=53/UG=Mm.3433/LL=13601/DEF=Mus musculus extracellular matrix protein 1 (Ecm1), mRNA, /PROD=extracellular matrix protein 1 /FL=gbNM_007899.1 gb133416.1                                                                                                                                                                         | 2801.5664 | 1210.8658 | 1481.3999 | 358.34644 | 1.8107661 | 2.0 | 0.21188116 | 0.3351709  |
| gbAK002681.1/DB_XREF=gi 12832810/FEA=mRNA/CNT=777/ID=Mm.27395.1/7/IER=Stack/STK=34/UG=Mm.27395/LL=76263/UG_GENE=061002519R/UG_TITLE=RIKEN cDNA 061002519 gene /DEF=Mus musculus adult male kidney cDNA, RIKEN full-length enriched library, clone 061002519 homolog to GLUTATHIONE S-TRANSFERASE, MITOCHONDRIAL (EC 2.5.1.18) (GST 13-13) (GLUTATHIONE S-TRANSFERASE SUBUNIT 13) (GST CLASS-KAPPA) (HDCMD47P), full insert... | 3342.1003 | 954.06024 | 2284.0    | 660.2486  | 1.5795715 | 3.0 | 0.21232854 | 0.33471236 |
| gbNM_053122.1/DB_XREF=gi 1674620/GEN=Imp2/DEF=Mus musculus inner mitochondrial membrane peptidase 2-like (S. cerevisiae) (Imp2), mRNA, /PROD=inner mitochondrial membrane peptidase 2-like (S. cerevisiae) /FL=gb:AF359564.1 gbNM_053122.1                                                                                                                                                                                    | 1377.0668 | 475.85724 | 873.3333  | 85.10619  | 1.8048774 | 3.0 | 0.21285515 | 0.33438143 |
| gbBM235840/DB_XREF=gi 7871110/DB_XREF=gi K04260C63/CLONE=K04260C6/FEA=mRNA/CNT=147/7/ID=Mm.159813.1/7/IER=Stack/STK=11/UG=Mm.159813.1/UG_GENE=Usp2/DEF=Mus musculus, clone IMAGE 5102112, mRNA, partial cds.                                                                                                                                                                                                                  | 1349.6    | 955.2317  | 2434.4333 | 712.7231  | 1.5765651 | 3.0 | 0.21298838 | 0.33343697 |
| gbAK018713.1/DB_XREF=gi 12858581/GEN=Cyba/FEA=mRNA/CNT=17/ID=Mm.448.2/7/IER=ConsEnd/STK=0/UG=Mm.448/UG_GENE=Nud3/DEF=Mus musculus, nudix (nucleotide diphosphate linked moiety X)-type motif 3, clone MGC-28998 IMAGE 2615904, mRNA, complete cds. /PROD=nudix (nucleotide diphosphate linked moiety X)-type motif 3 /FL=gb:BC016534.1                                                                                        | 1930.9332 | 586.1127  | 1270.2334 | 430.65775 | 1.5734007 | 3.0 | 0.21368538 | 0.33337855 |
| gbNM_011722.1/DB_XREF=gi 8756008/GEN=Dnab6/FEA=FLmRNA/CNT=129/7/ID=Mm.90496.1/7/IER=FL+Stack/STK=85/UG=Mm.90496/LL=22428/DEF=Mus musculus dynactin 6 (Dnab6), mRNA, /PROD=dynactin 6 /FL=gb:AF124788.1 gbNM_011722.1                                                                                                                                                                                                          | 1629.3002 | 83.222305 | 1194.2333 | 410.49402 | 1.7991323 | 2.0 | 0.21381108 | 0.3324323  |
| gbAF10796.1/DB_XREF=gi 12857270/GEN=Dnab6/FEA=FLmRNA/CNT=129/7/ID=Mm.90496.1/7/IER=FL+Stack/STK=85/UG=Mm.90496/LL=22428/DEF=Mus musculus dynactin 6 (Dnab6), mRNA, /PROD=dynactin 6 /FL=gb:AF124788.1 gbNM_011722.1                                                                                                                                                                                                           | 1629.3002 | 83.222305 | 1194.2333 | 410.49402 | 1.7991323 | 2.0 | 0.21381108 | 0.3324323  |
| gbNM_017622.1/DB_XREF=gi 12857270/GEN=Dnab6/FEA=FLmRNA/CNT=129/7/ID=Mm.90496.1/7/IER=FL+Stack/STK=85/UG=Mm.90496/LL=22428/DEF=Mus musculus dynactin 6 (Dnab6), mRNA, /PROD=dynactin 6 /FL=gb:AF124788.1 gbNM_011722.1                                                                                                                                                                                                         | 1629.3002 | 83.222305 | 1194.2333 | 410.49402 | 1.7991323 | 2.0 | 0.21381108 | 0.3324323  |
| gbNM_025650.1/DB_XREF=gi 13384929/GEN=2310008M10R/FEA=FLmRNA/CNT=192/7/ID=Mm.3811.1/7/IER=FL+Stack/STK=21/UG=Mm.3811/LL=66357/DEF=Mus musculus RIKEN cDNA 2310008M10 (2310008M10R), mRNA, /PROD=RIKEN cDNA 2310008M10 /FL=gb:BC021935.1 gbNM_025650.1                                                                                                                                                                         | 1907.1666 | 421.60797 | 1362.2667 | 432.72708 | 1.5621666 | 3.0 | 0.21618043 | 0.33382964 |
| gbNM_007931.1/DB_XREF=gi 6679546/GEN=Eno3/FEA=FLmRNA/CNT=217/ID=Mm.4449.1/7/IER=FL+Stack/STK=2/UG=Mm.4449/LL=13806/DEF=Mus musculus enolase 3, alpha non-neuron (Eno3), mRNA, /PROD=enolase 3, alpha non-neuron (FL=gb:BC024844.1 gbNM_007931.1) /FL=gb:BC024844.1 gbNM_007931.1                                                                                                                                              | 2059.8667 | 481.12747 | 1506.5333 | 383.07217 | 1.5583705 | 3.0 | 0.21703082 | 0.33400676 |
| gbBC025821.1/DB_XREF=gi 20070721/FEA=FLmRNA/CNT=85/ID=Mm.87433.1/7/IER=FL+Stack/STK=33/UG=Mm.87433/LL=16649/UG_GENE=Kpnal/DEF=Mus musculus, karyopherin (importin) alpha 4, clone MGC-19244 IMAGE 3672708, mRNA, complete cds. /PROD=karyopherin (importin) alpha 4 /FL=gb:AF020771.1 gbNM_008467.1 gbBC025821.1                                                                                                              | 4096.9004 | 875.8401  | 6336.9    | 2006.1893 | 1.7723727 | 2.0 | 0.21833913 | 0.33488503 |
| gbNM_011722.1/DB_XREF=gi 12857270/GEN=Dnab6/FEA=FLmRNA/CNT=129/7/ID=Mm.90496.1/7/IER=FL+Stack/STK=85/UG=Mm.90496/LL=22428/DEF=Mus musculus dynactin 6 (Dnab6), mRNA, /PROD=dynactin 6 /FL=gb:AF124788.1 gbNM_011722.1                                                                                                                                                                                                         | 1629.3002 | 83.222305 | 1194.2333 | 410.49402 | 1.7991323 | 2.0 | 0.21381108 | 0.3324323  |
| gbNM_017622.1/DB_XREF=gi 12857270/GEN=Dnab6/FEA=FLmRNA/CNT=129/7/ID=Mm.90496.1/7/IER=FL+Stack/STK=85/UG=Mm.90496/LL=22428/DEF=Mus musculus dynactin 6 (Dnab6), mRNA, /PROD=dynactin 6 /FL=gb:AF124788.1 gbNM_011722.1                                                                                                                                                                                                         | 1629.3002 | 83.222305 | 1194.2333 | 410.49402 | 1.7991323 | 2.0 | 0.21381108 | 0.3324323  |
| gbNM_025650.1/DB_XREF=gi 13384929/GEN=2310008M10R/FEA=FLmRNA/CNT=192/7/ID=Mm.3811.1/7/IER=FL+Stack/STK=21/UG=Mm.3811/LL=66357/DEF=Mus musculus RIKEN cDNA 2310008M10 (2310008M10R), mRNA, /PROD=RIKEN cDNA 2310008M10 /FL=gb:BC021935.1 gbNM_025650.1                                                                                                                                                                         | 1907.1666 | 421.60797 | 1362.2667 | 432.72708 | 1.5621666 | 3.0 | 0.21618043 | 0.33382964 |
| gbNM_007931.1/DB_XREF=gi 6679546/GEN=Eno3/FEA=FLmRNA/CNT=217/ID=Mm.4449.1/7/IER=FL+Stack/STK=2/UG=Mm.4449/LL=13806/DEF=Mus musculus enolase 3, alpha non-neuron (Eno3), mRNA, /PROD=enolase 3, alpha non-neuron (FL=gb:BC024844.1 gbNM_007931.1) /FL=gb:BC024844.1 gbNM_007931.1                                                                                                                                              | 2059.8667 | 481.12747 | 1506.5333 | 383.07217 | 1.5583705 | 3.0 | 0.21703082 | 0.33400676 |
| gbBC025821.1/DB_XREF=gi 20070721/FEA=FLmRNA/CNT=85/ID=Mm.87433.1/7/IER=FL+Stack/STK=33/UG=Mm.87433/LL=16649/UG_GENE=Kpnal/DEF=Mus musculus, karyopherin (importin) alpha 4, clone MGC-19244 IMAGE 3672708, mRNA, complete cds. /PROD=karyopherin (importin) alpha 4 /FL=gb:AF020771.1 gbNM_008467.1 gbBC025821.1                                                                                                              | 4096.9004 | 875.8401  | 6336.9    | 2006.1893 | 1.7723727 | 2.0 | 0.21833913 | 0.33488503 |
| gbNM_011722.1/DB_XREF=gi 12857270/GEN=Dnab6/FEA=FLmRNA/CNT=129/7/ID=Mm.90496.1/7/IER=FL+Stack/STK=85/UG=Mm.90496/LL=22428/DEF=Mus musculus dynactin 6 (Dnab6), mRNA, /PROD=dynactin 6 /FL=gb:AF124788.1 gbNM_011722.1                                                                                                                                                                                                         | 1629.3002 | 83.222305 | 1194.2333 | 410.49402 | 1.7991323 | 2.0 | 0.21381108 | 0.3324323  |
| gbNM_017622.1/DB_XREF=gi 12857270/GEN=Dnab6/FEA=FLmRNA/CNT=129/7/ID=Mm.90496.1/7/IER=FL+Stack/STK=85/UG=Mm.90496/LL=22428/DEF=Mus musculus dynactin 6 (Dnab6), mRNA, /PROD=dynactin 6 /FL=gb:AF124788.1 gbNM_011722.1                                                                                                                                                                                                         | 1629.3002 | 83.222305 | 1194.2333 | 410.49402 | 1.7991323 | 2.0 | 0.21381108 | 0.3324323  |
| gbNM_025650.1/DB_XREF=gi 13384929/GEN=2310008M10R/FEA=FLmRNA/CNT=192/7/ID=Mm.3811.1/7/IER=FL+Stack/STK=21/UG=Mm.3811/LL=66357/DEF=Mus musculus RIKEN cDNA 2310008M10 (2310008M10R), mRNA, /PROD=RIKEN cDNA 2310008M10 /FL=gb:BC021935.1 gbNM_025650.1                                                                                                                                                                         | 1907.1666 | 421.60797 | 1362.2667 | 432.72708 | 1.5621666 | 3.0 | 0.21618043 | 0.33382964 |
| gbNM_007931.1/DB_XREF=gi 6679546/GEN=Eno3/FEA=FLmRNA/CNT=217/ID=Mm.4449.1/7/IER=FL+Stack/STK=2/UG=Mm.4449/LL=13806/DEF=Mus musculus enolase 3, alpha non-neuron (Eno3), mRNA, /PROD=enolase 3, alpha non-neuron (FL=gb:BC024844.1 gbNM_007931.1) /FL=gb:BC024844.1 gbNM_007931.1                                                                                                                                              | 2059.8667 | 481.12747 | 1506.5333 | 383.07217 | 1.5583705 | 3.0 | 0.21703082 | 0.33400676 |
| gbBC025821.1/DB_XREF=gi 20070721/FEA=FLmRNA/CNT=85/ID=Mm.87433.1/7/IER=FL+Stack/STK=33/UG=Mm.87433/LL=16649/UG_GENE=Kpnal/DEF=Mus musculus, karyopherin (importin) alpha 4, clone MGC-19244 IMAGE 3672708, mRNA, complete cds. /PROD=karyopherin (importin) alpha 4 /FL=gb:AF020771.1 gbNM_008467.1 gbBC025821.1                                                                                                              | 4096.9004 | 875.8401  | 6336.9    | 2006.1893 | 1.7723727 | 2.0 | 0.21833913 | 0.33488503 |
| gbNM_011722.1/DB_XREF=gi 12857270/GEN=Dnab6/FEA=FLmRNA/CNT=129/7/ID=Mm.90496.1/7/IER=FL+Stack/STK=85/UG=Mm.90496/LL=22428/DEF=Mus musculus dynactin 6 (Dnab6), mRNA, /PROD=dynactin 6 /FL=gb:AF124788.1 gbNM_011722.1                                                                                                                                                                                                         | 1629.3002 | 83.222305 | 1194.2333 | 410.49402 | 1.7991323 | 2.0 | 0.21381108 | 0.3324323  |
| gbNM_017622.1/DB_XREF=gi 12857270/GEN=Dnab6/FEA=FLmRNA/CNT=129/7/ID=Mm.90496.1/7/IER=FL+Stack/STK=85/UG=Mm.90496/LL=22428/DEF=Mus musculus dynactin 6 (Dnab6), mRNA, /PROD=dynactin 6 /FL=gb:AF124788.1 gbNM_011722.1                                                                                                                                                                                                         | 1629.3002 | 83.222305 | 1194.2333 | 410.49402 | 1.7991323 | 2.0 | 0.21381108 | 0.3324323  |
| gbNM_025650.1/DB_XREF=gi 13384929/GEN=2310008M10R/FEA=FLmRNA/CNT=192/7/ID=Mm.3811.1/7/IER=FL+Stack/STK=21/UG=Mm.3811/LL=66357/DEF=Mus musculus RIKEN cDNA 2310008M10 (2310008M10R), mRNA, /PROD=RIKEN cDNA 2310008M10 /FL=gb:BC021935.1 gbNM_025650.1                                                                                                                                                                         | 1907.1666 | 421.60797 | 1362.2667 | 432.72708 | 1.5621666 | 3.0 | 0.21618043 | 0.33382964 |
| gbNM_007931.1/DB_XREF=gi 6679546/GEN=Eno3/FEA=FLmRNA/CNT=217/ID=Mm.4449.1/7/IER=FL+Stack/STK=2/UG=Mm.4449/LL=13806/DEF=Mus musculus enolase 3, alpha non-neuron (Eno3), mRNA, /PROD=enolase 3, alpha non-neuron (FL=gb:BC024844.1 gbNM_007931.1) /FL=gb:BC024844.1 gbNM_007931.1                                                                                                                                              | 2059.8667 | 481.12747 | 1506.5333 | 383.07217 | 1.5583705 | 3.0 | 0.21703082 | 0.33400676 |
| gbBC025821.1/DB_XREF=gi 20070721/FEA=FLmRNA/CNT=85/ID=Mm.87433.1/7/IER=FL+Stack/STK=33/UG=Mm.87433/LL=16649/UG_GENE=Kpnal/DEF=Mus musculus, karyopherin (importin) alpha 4, clone MGC-19244 IMAGE 3672708, mRNA, complete cds. /PROD=karyopherin (importin) alpha 4 /FL=gb:AF020771.1 gbNM_008467.1 gbBC025821.1                                                                                                              | 4096.9004 | 875.8401  | 6336.9    | 2006.1893 | 1.7723727 | 2.0 | 0.21833913 | 0.33488503 |
| gbNM_011722.1/DB_XREF=gi 12857270/GEN=Dnab6/FEA=FLmRNA/CNT=129/7/ID=Mm.90496.1/7/IER=FL+Stack/STK=85/UG=Mm.90496/LL=22428/DEF=Mus musculus dynactin 6 (Dnab6), mRNA, /PROD=dynactin 6 /FL=gb:AF124788.1 gbNM_011722.1                                                                                                                                                                                                         | 1629.3002 | 83.222305 | 1194.2333 | 410.49402 | 1.7991323 | 2.0 | 0.21381108 | 0.3324323  |
| gbNM_017622.1/DB_XREF=gi 12857270/GEN=Dnab6/FEA=FLmRNA/CNT=129/7/ID=Mm.90496.1/7/IER=FL+Stack/STK=85/UG=Mm.90496/LL=22428/DEF=Mus musculus dynactin 6 (Dnab6), mRNA, /PROD=dynactin 6 /FL=gb:AF124788.1 gbNM_011722.1                                                                                                                                                                                                         | 1629.3002 | 83.222305 | 1194.2333 | 410.49402 | 1.7991323 | 2.0 | 0.21381108 | 0.3324323  |
| gbNM_025650.1/DB_XREF=gi 13384929/GEN=2310008M10R/FEA=FLmRNA/CNT=192/7/ID=Mm.3811.1/7/IER=FL+Stack/STK=21/UG=Mm.3811/LL=66357/DEF=Mus musculus RIKEN cDNA 2310008M10 (2310008M10R), mRNA, /PROD=RIKEN cDNA 2310008M10 /FL=gb:BC021935.1 gbNM_025650.1                                                                                                                                                                         | 1907.1666 | 421.60797 | 1362.2667 | 432.72708 | 1.5621666 | 3.0 | 0.21618043 | 0.33382964 |
| gbNM_007931.1/DB_XREF=gi 6679546/GEN=Eno3/FEA=FLmRNA/CNT=217/ID=Mm.4449.1/7/IER=FL+Stack/STK=2/UG=Mm.4449/LL=13806/DEF=Mus musculus enolase 3, alpha non-neuron (Eno3), mRNA, /PROD=enolase 3, alpha non-neuron (FL=gb:BC024844.1 gbNM_007931.1) /FL=gb:BC024844.1 gbNM_007931.1                                                                                                                                              | 2059.8667 | 481.12747 | 1506.5333 | 383.07217 | 1.5583705 | 3.0 | 0.21703082 | 0.33400676 |
| gbBC025821.1/DB_XREF=gi 20070721/FEA=FLmRNA/CNT=85/ID=Mm.87433.1/7/IER=FL+Stack/STK=33/UG=Mm.87433/LL=16649/UG_GENE=Kpnal/DEF=Mus musculus, karyopherin (importin) alpha 4, clone MGC-19244 IMAGE 3672708, mRNA, complete cds. /PROD=karyopherin (importin) alpha 4 /FL=gb:AF020771.1 gbNM_008467.1 gbBC025821.1                                                                                                              | 4096.9004 | 875.8401  | 6336.9    | 2006.1893 | 1.7723727 | 2.0 | 0.21833913 | 0.33488503 |
| gbNM_011722.1/DB_XREF=gi 12857270/GEN=Dnab6/FEA=FLmRNA/CNT=129/7/ID=Mm.90496.1/7/IER=FL+Stack/STK=85/UG=Mm.90496/LL=22428/DEF=Mus musculus dynactin 6 (Dnab6), mRNA, /PROD=dynactin 6 /FL=gb:AF124788.1 gbNM_011722.1                                                                                                                                                                                                         | 1629.3002 | 83.222305 | 1194.2333 | 410.49402 | 1.7991323 | 2.0 | 0.21381108 | 0.3324323  |
| gbNM_017622.1/DB_XREF=gi 12857270/GEN=Dnab6/FEA=FLmRNA/CNT=129/7/ID=Mm.90496.1/7/IER=FL+Stack/STK=85/UG=Mm.90496/LL=22428/DEF=Mus musculus dynactin 6 (Dnab6), mRNA, /PROD=dynactin 6 /FL=gb:AF124788.1 gbNM_011722.1                                                                                                                                                                                                         | 1629.3002 | 83.222305 | 1194.2333 | 410.49402 | 1.7991323 | 2.0 | 0.21381108 | 0.3324323  |
| gbNM_025650.1/DB_XREF=gi 13384929/GEN=2310008M10R/FEA=FLmRNA/CNT=192/7/ID=Mm.3811.1/7/IER=FL+Stack/STK=21/UG=Mm.3811/LL=66357/DEF=Mus musculus RIKEN cDNA 2310008M10 (2310008M10R), mRNA, /PROD=RIKEN cDNA 2310008M10 /FL=gb:BC021935.1 gbNM_025650.1                                                                                                                                                                         | 1907.1666 | 421.60797 | 1362.2667 | 432.72708 | 1.5621666 | 3.0 | 0.21618043 | 0.33382964 |
| gbNM_007931.1/DB_XREF=gi 6679546/GEN=Eno3/FEA=FLmRNA/CNT=217/ID=Mm.4449.1/7/IER=FL+Stack/STK=2/UG=Mm.4449/LL=13806/DEF=Mus musculus enolase 3, alpha non-neuron (Eno3), mRNA, /PROD=enolase 3, alpha non-neuron (FL=gb:BC024844.1 gbNM_007931.1) /FL=gb:BC024844.1 gbNM_007931.1                                                                                                                                              | 2059.8667 | 481.12747 | 1506.5333 | 383.07217 | 1.5583705 | 3.0 | 0.21703082 | 0.33400676 |
| gbBC025821.1/DB_XREF=gi 20070721/FEA=FLmRNA/CNT=85/ID=Mm.87433.1/7/IER=FL+Stack/STK=33/UG=Mm.87433/LL=16649/UG_GENE=Kpnal/DEF=Mus musculus, karyopherin (importin) alpha 4, clone MGC-19244 IMAGE 3672708, mRNA, complete cds. /PROD=karyopherin (importin) alpha 4 /FL=gb:AF020771.1 gbNM_008467.1 gbBC025821.1                                                                                                              | 4096.9004 | 875.8401  | 6336.9    | 2006.1893 | 1.7723727 | 2.0 | 0.21833913 | 0.33488503 |
| gbNM_011722.1/DB_XREF=gi 12857270/GEN=Dnab6/FEA=FLmRNA/CNT=129/7/ID=Mm.90496.1/7/IER=FL+Stack/STK=85/UG=Mm.90496/LL=22428/DEF=Mus musculus dynactin 6 (Dnab6), mRNA, /PROD=dynactin 6 /FL=gb:AF124788.1 gbNM_011722.1                                                                                                                                                                                                         | 1629.3002 | 83.222305 | 1194.2333 | 410.49402 | 1.799132  |     |            |            |

|                                                                                                                                                                                                                                                                                                                                                                |           |           |           |           |            |     |            |            |
|----------------------------------------------------------------------------------------------------------------------------------------------------------------------------------------------------------------------------------------------------------------------------------------------------------------------------------------------------------------|-----------|-----------|-----------|-----------|------------|-----|------------|------------|
| gb:NM_024243.1/DB_XREF=gi:1885906/GEN=0610006A03Rik/FEA=FLmRNA/CNT=204/7/ID=Mm.21580.1/7/IER=FL+Stack/STK=126/UG=Mm.21580/LL=17665/DEF=Mus musculus RIKEN cDNA 0610006A03 gene (0610006A03Rik), mRNA, /PROD=RIKEN cDNA 0610006A03/FL=gb:NM_024243.1 gb:BC003235.1                                                                                              | 2050.0999 | 373.57025 | 1488.3667 | 560.70416 | 1.4440475  | 3.0 | 0.24444532 | 0.34042385 |
| gb:NM_012248.1/DB_XREF=gi:12481/DEF=Mouse cytoplasmic beta-actin mRNA/IENT=1109(_5_,_M_,_3 represent transcript regions 5 prime, Middle, and 3 prime respectively)                                                                                                                                                                                             | 7098.533  | 3205.232  | 3795.8333 | 1436.3824 | 1.6286589  | 2.0 | 0.24493289 | 0.34005973 |
| gb:AK006418.1/DB_XREF=gi:12839509/FEA=mRNA/CNT=9/7/ID=Mm.139700.2/7/IER=ConsEnd/STK=7/UG=Mm.139700/LL=76171/UG_GENE=6330544805Rik/UG_TITLE=RIKEN cDNA 6330544805 gene /DEF=Mus musculus adult male testis cDNA, RIKEN full-length enriched library, clone:170027H16:homolog to ARF-LIKE 2 BINDING PROTEIN BART1 (BINDER OF ARL TWO), full insert sequence.     | 1334.9333 | 456.44818 | 879.5999  | 167.46419 | 1.6220952  | 2.0 | 0.24624552 | 0.34083983 |
| gb:CT6322.1/DB_XREF=gi:2516652/DB_XREF=ct6322/CLONE=J000811/FEA=FLmRNA/CNT=215/7/ID=Mm.22632.1/7/IER=Stack/STK=91/UG=Mm.14601/LL=14863/DEF=Mus musculus, Similar to transgelin 2, clone MGC:6300 IMAGE:2654361, mRNA, complete cds /FL=gb:BC009076.1 gb:AF149291.1                                                                                             | 1422.2999 | 547.77124 | 888.6667  | 163.41887 | 1.6169243  | 2.0 | 0.247286   | 0.34123966 |
| gb:AK012780.1/DB_XREF=gi:12849748/FEA=mRNA/CNT=10/7/ID=Mm.1980.2/7/IER=ConsEnd/STK=6/UG=Mm.1980/LL=69253/UG_GENE=Hspb2/UG_TITLE=heat shock 27kD protein 2/DEF=Mus musculus 10, 11 days embryo whole body cDNA, RIKEN full-length enriched library, clone:2810021G24:homolog to HEAT-SHOCK PROTEIN, BETA-2 (DMPK-BINDING PROTEIN) (MKBP), full insert sequence. | 1949.6333 | 717.2411  | 1206.8    | 345.3317  | 1.6162702  | 2.0 | 0.24741803 | 0.34038723 |
| gb:NM_008163.1/DB_XREF=gi:6680120/GEN=Gsm2z/FEA=FLmRNA/CNT=135/7/ID=Mm.14601.1/7/IER=FL+Stack/STK=91/UG=Mm.14601/LL=14863/DEF=Mus musculus glutathione S-transferase, mu 2 (Gsm2), mRNA, /PROD=glutathione S-transferase, mu 2 /FL=gb:J04696.1 gb:NM_008163.1                                                                                                  | 2698.0    | 388.65005 | 1897.5333 | 767.24585 | 1.6120245  | 2.0 | 0.24827717 | 0.34053728 |
| gb:NM_010798.1/DB_XREF=gi:54895/GEN=MF/FEA=FLmRNA/CNT=216/7/ID=Mm.2326.1/7/IER=FL+Stack/STK=96/UG=Mm.2326/LL=17319/DEF=Mus musculus macrophage migration inhibitory factor (Mif), mRNA, /PROD=macrophage migration inhibitory factor /FL=gb:NM_010798.1 gb:1.0613.1 gb:BC024895.1                                                                              | 5992.4336 | 1752.3951 | 4222.6333 | 1240.7228 | 1.4276481  | 3.0 | 0.24868712 | 0.34007215 |
| gb:NM_019391.1/DB_XREF=gi:1225263/GEN=Lsp1/FEA=FLmRNA/CNT=562/7/ID=Mm.2183.1/7/IER=FL+Stack/STK=37/UG=Mm.2183/LL=16985/DEF=Mus musculus lymphocyte specific 1 (Lsp1), mRNA, /PROD=lymphocyte specific 1 /FL=gb:NM_019391.1 gb:M90316.1 gb:BC003796.1                                                                                                           | 1213.8667 | 345.4198  | 850.1667  | 274.75565 | 1.4272609  | 3.0 | 0.24878806 | 0.33918855 |
| gb:NM_00744.1/DB_XREF=gi:8680981/GEN=Camt/FEA=FLmRNA/CNT=84/7/ID=Mm.35853.1/7/IER=FL+Stack/STK=19/UG=Mm.35853/LL=12846/DEF=Mus musculus catechol-O-methyltransferase (Comt), mRNA, /PROD=catechol-O-methyltransferase /FL=gb:AF076156.1 gb:NM_00744.1 gb:BC010402.1                                                                                            | 6855.0996 | 1962.6735 | 4987.967  | 434.9332  | 1.60871    | 2.0 | 0.24895056 | 0.33839387 |
| gb:NM_138749.1/DB_XREF=gi:20270280/GEN=P16nb2/FEA=FLmRNA/CNT=197/7/ID=Mm.28780.1/7/IER=FL+Stack/STK=74/UG=Mm.28780/LL=140570/DEF=Mus musculus plxin B2 (P16nb2), mRNA, /PROD=plxin B2 /FL=gb:NM_138749.1 gb:BC007481.1 gb:BC003293.1                                                                                                                           | 1338.4667 | 664.8858  | 697.9333  | 183.63422 | 1.6083946  | 2.0 | 0.24901477 | 0.33747074 |
| gb:NM_003694.1/DB_XREF=gi:13507625/GEN=Ifitm3i/FEA=FLmRNA/CNT=102/7/ID=Mm.14747.1/7/IER=FL+Stack/STK=44/UG=Mm.14747/LL=140878/DEF=Mus musculus interferon induced transmembrane protein 3-like (Ifitm3), mRNA, /PROD=interferon induced transmembrane protein, like /FL=gb:BC002160.1 gb:BC002102.1 gb:AY082486.1 gb:NM_003694.1                               | 7020.6    | 2221.2522 | 4749.467  | 1641.2349 | 1.4243245  | 3.0 | 0.249555   | 0.33719635 |
| gb:BC025117.1/DB_XREF=gi:19264026/FEA=FLmRNA/CNT=85/7/ID=Mm.21793.1/7/IER=FL+Stack/STK=13/UG=Mm.21793/LL=66363/UG_GENE=2310005G07Rik/DEF=Mus musculus, RIKEN cDNA 2310005G07 gene, clone MGC:35747 IMAGE:3984181, mRNA, complete cds, /PROD=RIKEN cDNA 2310005G07 gene /FL=gb:NM_025514.1 gb:BC025117.1                                                        | 2440.0667 | 653.6071  | 1782.5668 | 282.57137 | 1.5993049  | 2.0 | 0.25087416 | 0.3379729  |
| gb:BC027196.1/DB_XREF=gi:20071133/FEA=FLmRNA/CNT=203/7/ID=Mm.34411.1/7/IER=FL+Stack/STK=128/UG=Mm.34411/DEF=Mus musculus, Similar to pyruvate dehydrogenase kinase, isoenzyme 1, clone MGC:28719 IMAGE:4458562, mRNA, complete cds, /PROD=Similar to pyruvate dehydrogenase kinase, isoenzyme 1 /FL=gb:BC027196.1                                              | 1481.2001 | 424.4901  | 269.0334  | 1182.8103 | 1.5958194  | 2.0 | 0.25159192 | 0.3379371  |
| gb:BC013496.1/DB_XREF=gi:15488700/FEA=mRNA/CNT=2/7/ID=Mm.10477.19/7/IER=ConsEnd/STK=0/UG=Mm.10477/LL=16114/UG_GENE=Ilgk-V28/DEF=Mus musculus, clone IMAGE:4219618, mRNA, partial cds, /PROD=Unknown (protein for IMAGE:4219618)                                                                                                                                | 2536.7    | 1346.0999 | 5748.767  | 3229.9329 | 1.5899211  | 2.0 | 0.2528125  | 0.33857486 |
| gb:NM_013670.1/DB_XREF=gi:3055508/GEN=Snripn/FEA=FLmRNA/CNT=253/7/ID=Mm.43721.1/7/IER=FL+Stack/STK=178/UG=Mm.43721/LL=20646/DEF=Mus musculus small nuclear ribonucleoprotein N (Snripn), mRNA, /PROD=small nuclear ribonucleoprotein N /FL=gb:BC024880.1 gb:NM_013670.1 gb:BC019589.1                                                                          | 4073.7668 | 1357.4027 | 2778.2334 | 400.39764 | 1.5855645  | 2.0 | 0.25371894 | 0.3387894  |
| gb:NM_013771.1/DB_XREF=gi:349863/FEA=FLmRNA/CNT=98/7/ID=Mm.821.1/7/IER=FL+Stack/STK=47/UG=Mm.821/LL=57086/UG_GENE=5210005G07Rik/DEF=Mus musculus, RIKEN cDNA 5210005G07 gene, clone MGC:6298 IMAGE:2651704, mRNA, complete cds, /PROD=Unknown (protein for MGC:6298) /FL=gb:AF230356.1 gb:BC013771.1 gb:NM_021336.1                                            | 1188.9333 | 656.97046 | 1902.2999 | 693.9675  | 1.4081479  | 3.0 | 0.2538262  | 0.3379387  |
| gb:NM_008816.1/DB_XREF=gi:8679272/GEN=Pecam/FEA=FLmRNA/CNT=15/7/ID=Mm.2822.1/7/IER=FL/STK=2/UG=Mm.2822/LL=18613/DEF=Mus musculus plateletendothelial cell adhesion molecule (Pecam), mRNA, /PROD=plateletendothelial cell adhesion molecule /FL=gb:NM_008816.1 gb:U06039.1                                                                                     | 1024.2666 | 261.8756  | 663.30005 | 358.61865 | 1.407957   | 3.0 | 0.2538771  | 0.33701816 |
| gb:BC004096.1/DB_XREF=gi:13278617/FEA=FLmRNA/CNT=7/7/ID=Mm.167102.2/7/IER=FL/STK=1/UG=Mm.16710/LL=16211/UG_GENE=Impnb/DEF=Mus musculus, clone MGC:8315 IMAGE:3594201, mRNA, complete cds, /PROD=Unknown (protein for MGC:8315) /FL=gb:BC004096.1                                                                                                               | 2197.7332 | 580.041   | 3536.7668 | 1344.1012 | 1.5842928  | 2.0 | 0.2539843  | 0.33617747 |
| gb:AF205078.1/DB_XREF=gi:9828172/FEA=mRNA/CNT=116/7/ID=Mm.29933.1/7/IER=Stack/STK=76/UG=Mm.29933/LL=72333/UG_GENE=2410003B18Rik/DEF=Mus musculus strain Swiss WebsterNIH actin-associated protein palladin mRNA, partial cds, /PROD=actin-associated protein palladin                                                                                          | 2120.3    | 569.42145 | 1508.4332 | 496.02515 | 1.4033719  | 3.0 | 0.25510228 | 0.33667567 |
| gb:NM_026612.1/DB_XREF=gi:13386095/GEN=1810011001Rik/FEA=FLmRNA/CNT=92/7/ID=Mm.29415.1/7/IER=FL+Stack/STK=67/UG=Mm.29415/LL=68198/DEF=Mus musculus RIKEN cDNA 1810011001 gene (1810011001Rik), mRNA, /PROD=RIKEN cDNA 1810011001/FL=gb:BC013510.1 gb:NM_026612.1                                                                                               | 15384.167 | 4013.6558 | 11335.101 | 1932.8859 | 1.5742899  | 2.0 | 0.25608414 | 0.33699188 |
| gb:NM_011141.1/DB_XREF=gi:1285991/FEA=FLmRNA/CNT=211/7/ID=Mm.41928.1/7/IER=Stack/STK=55/UG=Mm.41928/LL=17992/UG_GENE=Ndufa4/DEF=Mus musculus, NADH dehydrogenase (ubiquinone) 1 alpha subcomplex, 4, clone MGC:7218 IMAGE:3483026, mRNA, complete cds, /PROD=NADH dehydrogenase (ubiquinone) 1 alpha subcomplex, 4 /FL=gb:BC011141.1                           | 20005.533 | 6725.475  | 13639.532 | 1986.9003 | 1.5722948  | 2.0 | 0.2565056  | 0.33657095 |
| gb:NM_011793.1/DB_XREF=gi:8753177/GEN=Bcrp1-pending/FEA=FLmRNA/CNT=167/7/ID=Mm.7508.1/7/IER=FL/STK=2/UG=Mm.7508/LL=23825/DEF=Mus musculus breakpoint cluster region protein 1 (Bcrp1-pending), mRNA, /PROD=breakpoint cluster region protein 1 /FL=gb:NM_011793.1 gb:AB025349.1                                                                                | 1859.2999 | 494.08163 | 1304.1666 | 480.25177 | 1.3954734  | 3.0 | 0.25722775 | 0.33654583 |
| gb:NM_025706.1/DB_XREF=gi:13385163/GEN=4432405K22Rik/FEA=FLmRNA/CNT=232/7/ID=Mm.2252.1/7/IER=FL+Stack/STK=137/UG=Mm.2252/LL=166887/DEF=Mus musculus RIKEN cDNA 4432405K22 gene (4432405K22Rik), mRNA, /PROD=RIKEN cDNA 4432405K22/FL=gb:BC020760.1 gb:NM_025706.1                                                                                              | 2074.0334 | 925.5119  | 3127.4668 | 926.4323  | 1.3933324  | 3.0 | 0.25780717 | 0.33633462 |
| gb:AK004661.1/DB_XREF=gi:1285991/FEA=FLmRNA/CNT=211/7/ID=Mm.22179.1/7/IER=Stack/STK=28/UG=Mm.22179/LL=67456/UG_GENE=1200009B18Rik/UG_TITLE=RIKEN cDNA 1200009B18 gene /DEF=Mus musculus adult male lung cDNA, RIKEN full-length enriched library, clone:1200009B18:homolog to CDA14, full insert sequence. /FL=gb:BC006895.1 gb:BC018188.1 gb:BC026558.1       | 963.0     | 467.03268 | 1549.3334 | 564.1123  | 1.3867055  | 3.0 | 0.25960946 | 0.33771545 |
| gb:BC023060.1/DB_XREF=gi:18606201/FEA=mRNA/CNT=19/7/ID=Mm.44176.1/7/IER=Stack/STK=17/UG=Mm.44176/DEF=Mus musculus, Similar to EGF-containing fibulin-like extracellular matrix protein 1 /FL=gb:BC023060.1                                                                                                                                                     | 1247.9333 | 767.05914 | 1964.3334 | 217.40591 | 1.5563558  | 2.0 | 0.25990483 | 0.3371337  |
| gb:NM_026533.1/DB_XREF=gi:13386033/GEN=Rps13/FEA=FLmRNA/CNT=343/7/ID=Mm.14798.1/7/IER=FL+Stack/STK=170/UG=Mm.14798/LL=168052/DEF=Mus musculus ribosomal protein S13 (Rps13), mRNA, /PROD=ribosomal protein S13 /FL=gb:NM_026533.1 gb:BC011192.1                                                                                                                | 17834.967 | 5539.1167 | 12845.399 | 941.7359  | 1.538138   | 2.0 | 0.26386073 | 0.34128997 |
| gb:NM_013670.1/DB_XREF=gi:3055508/GEN=Snripn/FEA=FLmRNA/CNT=253/7/ID=Mm.43721.1/7/IER=FL+Stack/STK=178/UG=Mm.43721/LL=20646/DEF=Mus musculus small nuclear ribonucleoprotein N (Snripn), mRNA, /PROD=small nuclear ribonucleoprotein N /FL=gb:BC024880.1 gb:NM_013670.1 gb:BC019589.1                                                                          | 3676.5    | 1964.3711 | 1895.9    | 476.49503 | 1.5257676  | 2.0 | 0.26659068 | 0.34384137 |
| gb:AK005096.1/DB_XREF=gi:12836790/FEA=mRNA/CNT=38/7/ID=Mm.44075.1/7/IER=Stack/STK=22/UG=Mm.44075/LL=70364/UG_GENE=150000103Rik/UG_TITLE=RIKEN cDNA 150000103 gene /DEF=Mus musculus adult male cerebellum cDNA, RIKEN full-length enriched library, clone:15000103:homolog to CDNA1/FL22362 FIS, CLONE HRC0854, full insert sequence.                          | 1331.4    | 363.54633 | 911.39996 | 398.89136 | 1.34789    | 2.0 | 0.2704402  | 0.34781826 |
| gb:NM_011793.1/DB_XREF=gi:8753177/GEN=Bcrp1-pending/FEA=FLmRNA/CNT=167/7/ID=Mm.7508.1/7/IER=FL/STK=2/UG=Mm.7508/LL=23825/DEF=Mus musculus breakpoint cluster region protein 1 (Bcrp1-pending), mRNA, /PROD=breakpoint cluster region protein 1 /FL=gb:NM_011793.1 gb:AB025349.1                                                                                | 1313.1333 | 341.6223  | 867.7     | 460.86154 | 1.348688   | 2.0 | 0.27130315 | 0.34794244 |
| gb:NM_022318.1/DB_XREF=gi:11612496/GEN=Pop2-pending/FEA=FLmRNA/CNT=49/7/ID=Mm.23890.1/7/IER=FL+Stack/STK=36/UG=Mm.23890/LL=64082/DEF=Mus musculus popeye 2 (Pop2-pending), mRNA, /PROD=popeye 2 /FL=gb:AF204175.1 gb:NM_022318.1                                                                                                                               | 7395.8667 | 2724.9272 | 4811.0    | 1195.4429 | 1.504601   | 2.0 | 0.2713454  | 0.3470164  |
| gb:BC025501.1/DB_XREF=gi:1285991/FEA=FLmRNA/CNT=211/7/ID=Mm.10091.2/7/IER=FL+Stack/STK=74/UG=Mm.10091/LL=18769/UG_GENE=Pkg/DEF=Mus musculus, protein kinase inhibitor, gamma, clone MGC:36052 IMAGE:5006826, mRNA, complete cds, /PROD=protein kinase inhibitor, gamma /FL=gb:BC026550.1                                                                       | 4608.9336 | 575.2312  | 3331.2    | 1355.7172 | 1.5027447  | 2.0 | 0.2717675  | 0.3465799  |
| gb:NM_031176.1/DB_XREF=gi:13928671/GEN=Tnxb/FEA=FLmRNA/CNT=413/7/ID=Mm.183266.1/7/IER=FL/STK=2/UG=Mm.183266/LL=81877/DEF=Mus musculus tenascin XB (Tnxb), mRNA, /PROD=tenascin XB /FL=gb:NM_031176.1                                                                                                                                                           | 1731.1666 | 907.9988  | 932.7     | 486.432   | 1.342591   | 3.0 | 0.27195567 | 0.34584838 |
| gb:NM_007750.1/DB_XREF=gi:6680992/GEN=Cox8a/FEA=FLmRNA/CNT=189/7/ID=Mm.14022.1/7/IER=FL+Stack/STK=125/UG=Mm.14022/LL=12688/DEF=Mus musculus cytochrome c oxidase, subunit VIIIa (Cox8a), mRNA, /PROD=cytochrome c oxidase, subunit VIIIa /FL=gb:U37721.1 gb:NM_007750.1                                                                                        | 2268.0    | 424.9446  | 1662.5    | 663.0841  | 1.3316449  | 3.0 | 0.2751148  | 0.3488886  |
| gb:NM_009982.1/DB_XREF=gi:6753553/GEN=Ctsc/FEA=FLmRNA/CNT=280/7/ID=Mm.684.1/7/IER=FL+Stack/STK=93/UG=Mm.684/LL=13032/DEF=Mus musculus cathepsin C (Ctsc), mRNA, /PROD=cathepsin C /FL=gb:U74683.3 gb:NM_009982.1 gb:U89269.1                                                                                                                                   | 4534.1333 | 1361.0074 | 3302.5999 | 532.1105  | 1.4596839  | 2.0 | 0.28179538 | 0.3563652  |
| gb:BC002090.1/DB_XREF=gi:12805254/FEA=FLmRNA/CNT=31/7/ID=Mm.27128.1/7/IER=FL/STK=2/UG=Mm.27128/LL=86556/UG_GENE=2310074H19Rik/DEF=Mus musculus, Similar to DR1-associated protein 1 (negative cofactor 2 alpha), clone MGC:6341 IMAGE:3481839, mRNA, complete cds, /PROD=Similar to DR1-associated protein 1 (negative cofactor 2 alpha) /FL=gb:BC002090.1     | 3833.4668 | 1725.8673 | 2366.5999 | 262.58167 | 1.40553742 | 2.0 | 0.28282443 | 0.35667303 |
| gb:BC027290.1/DB_XREF=gi:20070999/FEA=FLmRNA/CNT=23/7/ID=Mm.48232.1/7/IER=FL+Stack/STK=14/UG=Mm.48232/LL=8888/UG_GENE=B430311C09Rik/DEF=Mus musculus, RIKEN cDNA B430311C09 gene, clone MGC:27734 IMAGE:2647023, mRNA, complete cds, /PROD=RIKEN cDNA B430311C09 gene /FL=gb:BC027290.1                                                                        | 1301.5    | 433.59323 | 899.60004 | 206.88048 | 1.448966   | 2.0 | 0.28436327 | 0.35762027 |
| gb:BC024398.1/DB_XREF=gi:19353453/FEA=FLmRNA/CNT=102/7/ID=Mm.10586.1/7/IER=FL+Stack/STK=33/UG=Mm.10586/LL=71966/UG_GENE=2410003M04Rik/DEF=Mus musculus, RIKEN cDNA 2410003M04 gene, clone MGC:36234 IMAGE:5003001, mRNA, complete cds, /PROD=RIKEN cDNA 2410003M04 gene /FL=gb:BC013469.1 gb:BC024398.1                                                        | 1527.3666 | 475.4801  | 1109.0333 | 157.3033  | 1.4467617  | 2.0 | 0.28498503 | 0.3572993  |
| gb:BC020068.1/DB_XREF=gi:18043363/FEA=FLmRNA/CNT=31/7/ID=Mm.172352.1/7/IER=FL/STK=6/UG=Mm.172352/DEF=Mus musculus, Similar to RIKEN cDNA 953053H05 gene, clone MGC:28371 IMAGE:4020866, mRNA, complete cds, /PROD=Similar to RIKEN cDNA 953053H05 gene /FL=gb:BC020068.1                                                                                       | 610.4333  | 222.68494 | 1039.9    | 463.5047  | 1.4465678  | 2.0 | 0.28494188 | 0.35637358 |
| gb:NM_022976.1/DB_XREF=gi:1818334/GEN=Lrg-pending/FEA=FLmRNA/CNT=132/7/ID=Mm.176946.1/7/IER=FL+Stack/STK=49/UG=Mm.176946/LL=76905/DEF=Mus musculus leucine-rich alpha-2-glycoprotein (Lrg-pending), mRNA, /PROD=leucine-rich alpha-2-glycoprotein /FL=gb:AF403429.1 gb:AB055885.1 gb:NM_022976.1                                                               | 990.1667  | 377.34503 | 612.86664 | 335.041   | 1.2950386  | 3.0 | 0.2859639  | 0.35666925 |
| gb:BC010331.1/DB_XREF=gi:16307568/FEA=FLmRNA/CNT=140/7/ID=Mm.6586.1/7/IER=FL+Stack/STK=86/UG=Mm.6586/DEF=Mus musculus, clone MGC:6299 IMAGE:2654341, mRNA, complete cds, /PROD=Unknown (protein for MGC:6299) /FL=gb:BC010331.1 gb:AF071546.1                                                                                                                  | 1688.6666 | 570.3714  | 1201.7999 | 318.48758 | 1.2908622  | 3.0 | 0.28722993 | 0.3572668  |
| gb:NM_007750.1/DB_XREF=gi:6680992/GEN=Cox8a/FEA=FLmRNA/CNT=189/7/ID=Mm.14022.1/7/IER=FL+Stack/STK=125/UG=Mm.14022/LL=12688/DEF=Mus musculus cytochrome c oxidase, subunit VIIIa (Cox8a), mRNA, /PROD=cytochrome c oxidase, subunit VIIIa /FL=gb:U37721.1 gb:NM_007750.1                                                                                        | 2348.0667 | 582.6127  | 1683.4332 | 680.7008  | 1.2848178  | 2.0 | 0.28907257 | 0.35857636 |
| gb:AK007959.1/DB_XREF=gi:12841843/GEN=Kif3/FEA=mRNA/CNT=9/7/ID=Mm.28787.2/7/IER=Stack/STK=31/UG=Mm.28787/LL=16599/UG_TITLE=Kruppel-like factor 3 (basic) /DEF=Mus musculus 10 day old male pancreas cDNA, RIKEN full-length enriched library, clone:1810073A04:Kruppel-like factor 3 (basic), full insert sequence.                                            | 1284.3334 | 330.9694  | 894.1333  | 409.0531  | 1.2844399  | 3.0 | 0.2891882  | 0.35774237 |
| gb:AK01872.1/DB_XREF=gi:12858675/FEA=mRNA/CNT=90/7/ID=Mm.45683.1/7/IER=Stack/STK=34/UG=Mm.45683/LL=78304/UG_GENE=1500034E06Rik/UG_TITLE=RIKEN cDNA 1500034E06 gene /DEF=Mus musculus adult male cerebellum cDNA, RIKEN full-length enriched library, clone:1500034E06:Sm protein containing protein, full insert sequence.                                     | 6024.7993 | 1744.9688 | 4426.1    | 861.1195  | 1.4230223  | 2.0 | 0.2907013  | 0.35863695 |
| gb:AK017291.1/DB_XREF=gi:1285421/FEA=FLmRNA/CNT=52/7/ID=Mm.23242.1/7/IER=Stack/STK=27/UG=Mm.23242/LL=17408/UG_GENE=5430405D02Rik/UG_TITLE=RIKEN cDNA 5430405D02 gene /DEF=Mus musculus 6 days neonate head cDNA, RIKEN full-length enriched library, clone:5430405D02:unclassified transcript, full insert sequence.                                           | 851.36664 | 128.27292 | 1371.7666 | 598.14606 | 1.4156123  | 2.0 | 0.29254377 | 0.35993192 |
| gb:BC005547.1/DB_XREF=gi:13542679/FEA=FLmRNA/CNT=515/7/ID=Mm.21840.1/7/IER=FL+Stack/STK=279/UG=Mm.21840/LL=68222/UG_GENE=4930542G03Rik/DEF=Mus musculus, clone MGC:6713 IMAGE:3585500, mRNA, complete cds, /PROD=Unknown (protein for MGC:6713) /FL=gb:BC022919.1 gb:BC005547.1                                                                                | 7940.133  | 2849.038  | 5353.1    | 1400.036  | 1.4115437  | 2.0 |            |            |

|                                                                                                                                                                                                                                                                                                                                                                                                          |           |           |           |           |           |     |            |            |
|----------------------------------------------------------------------------------------------------------------------------------------------------------------------------------------------------------------------------------------------------------------------------------------------------------------------------------------------------------------------------------------------------------|-----------|-----------|-----------|-----------|-----------|-----|------------|------------|
| gb NM_003033.1 DB_XREF=gi 6880308 GEN=Hspc1 FEA=FLmRNA CNT=27 TID=Mm.197601.1 TIER=FL+Stack STK=32<br>/UG=Mm.197601.1 DB_XREF=gi 15528 DEF=Mus musculus heat shock 10 kDa protein 1 (chaperonin 10) (Hspc1), mRNA, /PROD=heat shock 10 kDa<br>protein 1 (chaperonin 10) /FL=gb NM_003033.1 gb U06599.1 gb BC024385.1                                                                                     | 2460.5999 | 742.7351  | 1814.6666 | 298.21667 | 1.3978438 | 2.0 | 0.2970214  | 0.36249384 |
| gb NM_010050.1 DB_XREF=gi 5753637 GEN=U062 FEA=FLmRNA CNT=27 TID=Mm.21389.1 TIER=FL+Stack STK=16 UG=Mm.21389<br>/LL=13371 DEF=Mus musculus deiodinase, iodothyronine, type 1 (Dio2), mRNA, /PROD=deiodinase, iodothyronine, type 1 /FL=gb AF177196.1<br>gb NM_010050.1 gb AF093137.1 gb AF096875.1                                                                                                       | 400.40002 | 116.28194 | 767.9666  | 442.2855  | 1.3921314 | 2.0 | 0.2984789  | 0.36329603 |
| gb NM_010907.1 DB_XREF=gi 5754339 GEN=NR1Kb3 FEA=FLmRNA CNT=183 TID=Mm.8884.1 TIER=FL+Stack STK=97 UG=Mm.8884<br>/LL=168 DEF=Mus musculus nuclear factor of kappa light chain gene enhancer in B-cells inhibitor, alpha (Nfkbia), mRNA, /PROD=nuclear<br>factor of kappa light chain gene enhancer in B-cells inhibitor, alpha (Nfkbia) /FL=gb NM_010907.1 gb U36277.1                                   | 2398.0999 | 1137.4896 | 1406.9668 | 523.849   | 1.3708122 | 2.0 | 0.30399716 | 0.3690233  |
| gb BC008166.1 DB_XREF=gi 14198212 FEA=FLmRNA CNT=157 TID=Mm.186.1 TIER=FL+Stack STK=47 UG=Mm.186 LL=76281<br>/UG_GENE=130001 C24Rik DEF=Mus musculus, RIKEN cDNA 130001 C24 gene MGC:7169 IMAGE:3257323, mRNA, complete<br>cds, /PROD=RIKEN cDNA 130001 C24 gene /FL=gb BC008166.1                                                                                                                       | 2138.5667 | 693.2226  | 1549.7666 | 272.3373  | 1.3692713 | 2.0 | 0.30440086 | 0.36852798 |
| gb BC021383.1 DB_XREF=gi 16204067 FEA=FLmRNA CNT=181 TID=Mm.22682.1 TIER=FL+Stack STK=93 UG=Mm.22682<br>/LL=117150 UG_GENE=Pp5k2c DEF=Mus musculus, phosphatidylinositol-4-phosphate 5-kinase, type I, gamma, clone MGC:29371<br>/UG_GENE=130001 C24Rik DEF=Mus musculus, complete cds, /PROD=phosphatidylinositol-4-phosphate 5-kinase, type I, gamma /FL=gb AB054591.1 gb BC021383.1<br>gb NM_054097.1 | 1285.8334 | 300.57645 | 910.33344 | 432.14334 | 1.2355403 | 3.0 | 0.30456167 | 0.36774203 |
| gb NM_009161.1 DB_XREF=gi 6671922 GEN=Scga FEA=FLmRNA CNT=357 TID=Mm.18709.1 TIER=FL+Stack STK=21 UG=Mm.18709<br>/LL=20391 DEF=Mus musculus, serine hydroxymethyl transferase 1 (soluble), clone MGC:14007 IMAGE:4160579, mRNA, complete<br>cds, /PROD=serine hydroxymethyl transferase 1 (soluble) /FL=gb AB024920.1 gb AF019564.1 gb NM_009161.1                                                       | 2397.4001 | 819.89575 | 1718.4    | 267.866   | 1.3634822 | 2.0 | 0.30592343 | 0.36840647 |
| gb AF28255.1 DB_XREF=gi 9652249 GEN=Dsg1 FEA=FLmRNA CNT=119 TID=Mm.56.1 TIER=FL+Stack STK=1 UG=Mm.56 LL=54720<br>/DEF=Mus musculus Down syndrome candidate region 1 protein (Dscr1) mRNA, complete cds, /PROD=Down syndrome candidate region 1<br>protein /FL=gb AF28255.1 gb AF32789.1 gb U04956.1                                                                                                      | 870.0999  | 438.59137 | 487.6     | 314.48032 | 1.2275844 | 3.0 | 0.30714175 | 0.3688951  |
| gb NM_080555.1 DB_XREF=gi 18017589 GEN=Pap2b FEA=FLmRNA CNT=81 TID=Mm.29124.1 TIER=FL+Stack STK=32<br>/UG=Mm.29124 LL=67916 DEF=Mus musculus phosphatidic acid phosphatase type 2B (Pap2b), mRNA, /PROD=phosphatidic acid<br>phosphatase type 2B /FL=gb NM_080555.1 gb BC005558.1                                                                                                                        | 2908.0999 | 967.49896 | 2102.5999 | 605.9832  | 1.2221063 | 3.0 | 0.3089313  | 0.37006545 |
| gb BC026055.1 DB_XREF=gi 19913455 FEA=FLmRNA CNT=113 TID=Mm.3379.2 TIER=FL+Stack STK=4 UG=Mm.3379 LL=20425<br>/UG_GENE=Shnrt1 DEF=Mus musculus, serine hydroxymethyl transferase 1 (soluble), clone MGC:14007 IMAGE:4160579, mRNA, complete<br>cds, /PROD=serine hydroxymethyl transferase 1 (soluble) /FL=gb AF237702.1 gb BC026055.1                                                                   | 459.9     | 176.8502  | 1045.8334 | 731.91003 | 1.3478124 | 2.0 | 0.31009194 | 0.37047827 |
| gb NM_010907.1 DB_XREF=gi 5754339 GEN=NR1Kb3 FEA=FLmRNA CNT=183 TID=Mm.8884.1 TIER=FL+Stack STK=97 UG=Mm.8884<br>/LL=168 DEF=Mus musculus nuclear factor of kappa light chain gene enhancer in B-cells inhibitor, alpha (Nfkbia), mRNA, /PROD=nuclear<br>factor of kappa light chain gene enhancer in B-cells inhibitor, alpha (Nfkbia) /FL=gb NM_010907.1 gb U36277.1                                   | 2398.0999 | 1137.4896 | 1406.9668 | 523.849   | 1.3708122 | 2.0 | 0.30399716 | 0.3690233  |
| gb NM_080555.1 DB_XREF=gi 18017589 GEN=Pap2b FEA=FLmRNA CNT=81 TID=Mm.29124.1 TIER=FL+Stack STK=32<br>/UG=Mm.29124 LL=67916 DEF=Mus musculus phosphatidic acid phosphatase type 2B (Pap2b), mRNA, /PROD=phosphatidic acid<br>phosphatase type 2B /FL=gb NM_080555.1 gb BC005558.1                                                                                                                        | 2908.0999 | 967.49896 | 2102.5999 | 605.9832  | 1.2221063 | 3.0 | 0.3089313  | 0.37006545 |
| gb BC026055.1 DB_XREF=gi 19913455 FEA=FLmRNA CNT=113 TID=Mm.3379.2 TIER=FL+Stack STK=4 UG=Mm.3379 LL=20425<br>/UG_GENE=Shnrt1 DEF=Mus musculus, serine hydroxymethyl transferase 1 (soluble), clone MGC:14007 IMAGE:4160579, mRNA, complete<br>cds, /PROD=serine hydroxymethyl transferase 1 (soluble) /FL=gb AF237702.1 gb BC026055.1                                                                   | 459.9     | 176.8502  | 1045.8334 | 731.91003 | 1.3478124 | 2.0 | 0.31009194 | 0.37047827 |
| gb NM_010907.1 DB_XREF=gi 5754339 GEN=NR1Kb3 FEA=FLmRNA CNT=183 TID=Mm.8884.1 TIER=FL+Stack STK=97 UG=Mm.8884<br>/LL=168 DEF=Mus musculus nuclear factor of kappa light chain gene enhancer in B-cells inhibitor, alpha (Nfkbia), mRNA, /PROD=nuclear<br>factor of kappa light chain gene enhancer in B-cells inhibitor, alpha (Nfkbia) /FL=gb NM_010907.1 gb U36277.1                                   | 2398.0999 | 1137.4896 | 1406.9668 | 523.849   | 1.3708122 | 2.0 | 0.30399716 | 0.3690233  |
| gb NM_080555.1 DB_XREF=gi 18017589 GEN=Pap2b FEA=FLmRNA CNT=81 TID=Mm.29124.1 TIER=FL+Stack STK=32<br>/UG=Mm.29124 LL=67916 DEF=Mus musculus phosphatidic acid phosphatase type 2B (Pap2b), mRNA, /PROD=phosphatidic acid<br>phosphatase type 2B /FL=gb NM_080555.1 gb BC005558.1                                                                                                                        | 2908.0999 | 967.49896 | 2102.5999 | 605.9832  | 1.2221063 | 3.0 | 0.3089313  | 0.37006545 |
| gb BC026055.1 DB_XREF=gi 19913455 FEA=FLmRNA CNT=113 TID=Mm.3379.2 TIER=FL+Stack STK=4 UG=Mm.3379 LL=20425<br>/UG_GENE=Shnrt1 DEF=Mus musculus, serine hydroxymethyl transferase 1 (soluble), clone MGC:14007 IMAGE:4160579, mRNA, complete<br>cds, /PROD=serine hydroxymethyl transferase 1 (soluble) /FL=gb AF237702.1 gb BC026055.1                                                                   | 459.9     | 176.8502  | 1045.8334 | 731.91003 | 1.3478124 | 2.0 | 0.31009194 | 0.37047827 |
| gb NM_010907.1 DB_XREF=gi 5754339 GEN=NR1Kb3 FEA=FLmRNA CNT=183 TID=Mm.8884.1 TIER=FL+Stack STK=97 UG=Mm.8884<br>/LL=168 DEF=Mus musculus nuclear factor of kappa light chain gene enhancer in B-cells inhibitor, alpha (Nfkbia), mRNA, /PROD=nuclear<br>factor of kappa light chain gene enhancer in B-cells inhibitor, alpha (Nfkbia) /FL=gb NM_010907.1 gb U36277.1                                   | 2398.0999 | 1137.4896 | 1406.9668 | 523.849   | 1.3708122 | 2.0 | 0.30399716 | 0.3690233  |
| gb NM_080555.1 DB_XREF=gi 18017589 GEN=Pap2b FEA=FLmRNA CNT=81 TID=Mm.29124.1 TIER=FL+Stack STK=32<br>/UG=Mm.29124 LL=67916 DEF=Mus musculus phosphatidic acid phosphatase type 2B (Pap2b), mRNA, /PROD=phosphatidic acid<br>phosphatase type 2B /FL=gb NM_080555.1 gb BC005558.1                                                                                                                        | 2908.0999 | 967.49896 | 2102.5999 | 605.9832  | 1.2221063 | 3.0 | 0.3089313  | 0.37006545 |
| gb BC026055.1 DB_XREF=gi 19913455 FEA=FLmRNA CNT=113 TID=Mm.3379.2 TIER=FL+Stack STK=4 UG=Mm.3379 LL=20425<br>/UG_GENE=Shnrt1 DEF=Mus musculus, serine hydroxymethyl transferase 1 (soluble), clone MGC:14007 IMAGE:4160579, mRNA, complete<br>cds, /PROD=serine hydroxymethyl transferase 1 (soluble) /FL=gb AF237702.1 gb BC026055.1                                                                   | 459.9     | 176.8502  | 1045.8334 | 731.91003 | 1.3478124 | 2.0 | 0.31009194 | 0.37047827 |
| gb NM_010907.1 DB_XREF=gi 5754339 GEN=NR1Kb3 FEA=FLmRNA CNT=183 TID=Mm.8884.1 TIER=FL+Stack STK=97 UG=Mm.8884<br>/LL=168 DEF=Mus musculus nuclear factor of kappa light chain gene enhancer in B-cells inhibitor, alpha (Nfkbia), mRNA, /PROD=nuclear<br>factor of kappa light chain gene enhancer in B-cells inhibitor, alpha (Nfkbia) /FL=gb NM_010907.1 gb U36277.1                                   | 2398.0999 | 1137.4896 | 1406.9668 | 523.849   | 1.3708122 | 2.0 | 0.30399716 | 0.3690233  |
| gb NM_080555.1 DB_XREF=gi 18017589 GEN=Pap2b FEA=FLmRNA CNT=81 TID=Mm.29124.1 TIER=FL+Stack STK=32<br>/UG=Mm.29124 LL=67916 DEF=Mus musculus phosphatidic acid phosphatase type 2B (Pap2b), mRNA, /PROD=phosphatidic acid<br>phosphatase type 2B /FL=gb NM_080555.1 gb BC005558.1                                                                                                                        | 2908.0999 | 967.49896 | 2102.5999 | 605.9832  | 1.2221063 | 3.0 | 0.3089313  | 0.37006545 |
| gb BC026055.1 DB_XREF=gi 19913455 FEA=FLmRNA CNT=113 TID=Mm.3379.2 TIER=FL+Stack STK=4 UG=Mm.3379 LL=20425<br>/UG_GENE=Shnrt1 DEF=Mus musculus, serine hydroxymethyl transferase 1 (soluble), clone MGC:14007 IMAGE:4160579, mRNA, complete<br>cds, /PROD=serine hydroxymethyl transferase 1 (soluble) /FL=gb AF237702.1 gb BC026055.1                                                                   | 459.9     | 176.8502  | 1045.8334 | 731.91003 | 1.3478124 | 2.0 | 0.31009194 | 0.37047827 |
| gb NM_010907.1 DB_XREF=gi 5754339 GEN=NR1Kb3 FEA=FLmRNA CNT=183 TID=Mm.8884.1 TIER=FL+Stack STK=97 UG=Mm.8884<br>/LL=168 DEF=Mus musculus nuclear factor of kappa light chain gene enhancer in B-cells inhibitor, alpha (Nfkbia), mRNA, /PROD=nuclear<br>factor of kappa light chain gene enhancer in B-cells inhibitor, alpha (Nfkbia) /FL=gb NM_010907.1 gb U36277.1                                   | 2398.0999 | 1137.4896 | 1406.9668 | 523.849   | 1.3708122 | 2.0 | 0.30399716 | 0.3690233  |
| gb NM_080555.1 DB_XREF=gi 18017589 GEN=Pap2b FEA=FLmRNA CNT=81 TID=Mm.29124.1 TIER=FL+Stack STK=32<br>/UG=Mm.29124 LL=67916 DEF=Mus musculus phosphatidic acid phosphatase type 2B (Pap2b), mRNA, /PROD=phosphatidic acid<br>phosphatase type 2B /FL=gb NM_080555.1 gb BC005558.1                                                                                                                        | 2908.0999 | 967.49896 | 2102.5999 | 605.9832  | 1.2221063 | 3.0 | 0.3089313  | 0.37006545 |
| gb BC026055.1 DB_XREF=gi 19913455 FEA=FLmRNA CNT=113 TID=Mm.3379.2 TIER=FL+Stack STK=4 UG=Mm.3379 LL=20425<br>/UG_GENE=Shnrt1 DEF=Mus musculus, serine hydroxymethyl transferase 1 (soluble), clone MGC:14007 IMAGE:4160579, mRNA, complete<br>cds, /PROD=serine hydroxymethyl transferase 1 (soluble) /FL=gb AF237702.1 gb BC026055.1                                                                   | 459.9     | 176.8502  | 1045.8334 | 731.91003 | 1.3478124 | 2.0 | 0.31009194 | 0.37047827 |
| gb NM_010907.1 DB_XREF=gi 5754339 GEN=NR1Kb3 FEA=FLmRNA CNT=183 TID=Mm.8884.1 TIER=FL+Stack STK=97 UG=Mm.8884<br>/LL=168 DEF=Mus musculus nuclear factor of kappa light chain gene enhancer in B-cells inhibitor, alpha (Nfkbia), mRNA, /PROD=nuclear<br>factor of kappa light chain gene enhancer in B-cells inhibitor, alpha (Nfkbia) /FL=gb NM_010907.1 gb U36277.1                                   | 2398.0999 | 1137.4896 | 1406.9668 | 523.849   | 1.3708122 | 2.0 | 0.30399716 | 0.3690233  |
| gb NM_080555.1 DB_XREF=gi 18017589 GEN=Pap2b FEA=FLmRNA CNT=81 TID=Mm.29124.1 TIER=FL+Stack STK=32<br>/UG=Mm.29124 LL=67916 DEF=Mus musculus phosphatidic acid phosphatase type 2B (Pap2b), mRNA, /PROD=phosphatidic acid<br>phosphatase type 2B /FL=gb NM_080555.1 gb BC005558.1                                                                                                                        | 2908.0999 | 967.49896 | 2102.5999 | 605.9832  | 1.2221063 | 3.0 | 0.3089313  | 0.37006545 |
| gb BC026055.1 DB_XREF=gi 19913455 FEA=FLmRNA CNT=113 TID=Mm.3379.2 TIER=FL+Stack STK=4 UG=Mm.3379 LL=20425<br>/UG_GENE=Shnrt1 DEF=Mus musculus, serine hydroxymethyl transferase 1 (soluble), clone MGC:14007 IMAGE:4160579, mRNA, complete<br>cds, /PROD=serine hydroxymethyl transferase 1 (soluble) /FL=gb AF237702.1 gb BC026055.1                                                                   | 459.9     | 176.8502  | 1045.8334 | 731.91003 | 1.3478124 | 2.0 | 0.31009194 | 0.37047827 |
| gb NM_010907.1 DB_XREF=gi 5754339 GEN=NR1Kb3 FEA=FLmRNA CNT=183 TID=Mm.8884.1 TIER=FL+Stack STK=97 UG=Mm.8884<br>/LL=168 DEF=Mus musculus nuclear factor of kappa light chain gene enhancer in B-cells inhibitor, alpha (Nfkbia), mRNA, /PROD=nuclear<br>factor of kappa light chain gene enhancer in B-cells inhibitor, alpha (Nfkbia) /FL=gb NM_010907.1 gb U36277.1                                   | 2398.0999 | 1137.4896 | 1406.9668 | 523.849   | 1.3708122 | 2.0 | 0.30399716 | 0.3690233  |
| gb NM_080555.1 DB_XREF=gi 18017589 GEN=Pap2b FEA=FLmRNA CNT=81 TID=Mm.29124.1 TIER=FL+Stack STK=32<br>/UG=Mm.29124 LL=67916 DEF=Mus musculus phosphatidic acid phosphatase type 2B (Pap2b), mRNA, /PROD=phosphatidic acid<br>phosphatase type 2B /FL=gb NM_080555.1 gb BC005558.1                                                                                                                        | 2908.0999 | 967.49896 | 2102.5999 | 605.9832  | 1.2221063 | 3.0 | 0.3089313  | 0.37006545 |
| gb BC026055.1 DB_XREF=gi 19913455 FEA=FLmRNA CNT=113 TID=Mm.3379.2 TIER=FL+Stack STK=4 UG=Mm.3379 LL=20425<br>/UG_GENE=Shnrt1 DEF=Mus musculus, serine hydroxymethyl transferase 1 (soluble), clone MGC:14007 IMAGE:4160579, mRNA, complete<br>cds, /PROD=serine hydroxymethyl transferase 1 (soluble) /FL=gb AF237702.1 gb BC026055.1                                                                   | 459.9     | 176.8502  | 1045.8334 | 731.91003 | 1.3478124 | 2.0 | 0.31009194 | 0.37047827 |
| gb NM_010907.1 DB_XREF=gi 5754339 GEN=NR1Kb3 FEA=FLmRNA CNT=183 TID=Mm.8884.1 TIER=FL+Stack STK=97 UG=Mm.8884<br>/LL=168 DEF=Mus musculus nuclear factor of kappa light chain gene enhancer in B-cells inhibitor, alpha (Nfkbia), mRNA, /PROD=nuclear<br>factor of kappa light chain gene enhancer in B-cells inhibitor, alpha (Nfkbia) /FL=gb NM_010907.1 gb U36277.1                                   | 2398.0999 | 1137.4896 | 1406.9668 | 523.849   | 1.3708122 | 2.0 | 0.30399716 | 0.3690233  |
| gb NM_080555.1 DB_XREF=gi 18017589 GEN=Pap2b FEA=FLmRNA CNT=81 TID=Mm.29124.1 TIER=FL+Stack STK=32<br>/UG=Mm.29124 LL=67916 DEF=Mus musculus phosphatidic acid phosphatase type 2B (Pap2b), mRNA, /PROD=phosphatidic acid<br>phosphatase type 2B /FL=gb NM_080555.1 gb BC005558.1                                                                                                                        | 2908.0999 | 967.49896 | 2102.5999 | 605.9832  | 1.2221063 | 3.0 | 0.3089313  | 0.37006545 |
| gb BC026055.1 DB_XREF=gi 19913455 FEA=FLmRNA CNT=113 TID=Mm.3379.2 TIER=FL+Stack STK=4 UG=Mm.3379 LL=20425<br>/UG_GENE=Shnrt1 DEF=Mus musculus, serine hydroxymethyl transferase 1 (soluble), clone MGC:14007 IMAGE:4160579, mRNA, complete<br>cds, /PROD=serine hydroxymethyl transferase 1 (soluble) /FL=gb AF237702.1 gb BC026055.1                                                                   | 459.9     | 176.8502  | 1045.8334 | 731.91003 | 1.3478124 | 2.0 | 0.31009194 | 0.37047827 |
| gb NM_010907.1 DB_XREF=gi 5754339 GEN=NR1Kb3 FEA=FLmRNA CNT=183 TID=Mm.8884.1 TIER=FL+Stack STK=97 UG=Mm.8884<br>/LL=168 DEF=Mus musculus nuclear factor of kappa light chain gene enhancer in B-cells inhibitor, alpha (Nfkbia), mRNA, /PROD=nuclear<br>factor of kappa light chain gene enhancer in B-cells inhibitor, alpha (Nfkbia) /FL=gb NM_010907.1 gb U36277.1                                   | 2398.0999 | 1137.4896 | 1406.9668 | 523.849   | 1.3708122 | 2.0 | 0.30399716 | 0.3690233  |
| gb NM_080555.1 DB_XREF=gi 18017589 GEN=Pap2b FEA=FLmRNA CNT=81 TID=Mm.29124.1 TIER=FL+Stack STK=32<br>/UG=Mm.29124 LL=67916 DEF=Mus musculus phosphatidic acid phosphatase type 2B (Pap2b), mRNA, /PROD=phosphatidic acid<br>phosphatase type 2B /FL=gb NM_080555.1 gb BC005558.1                                                                                                                        | 2908.0999 | 967.49896 | 2102.5999 | 605.9832  | 1.2221063 | 3.0 | 0.3089313  | 0.37006545 |
| gb BC026055.1 DB_XREF=gi 19913455 FEA=FLmRNA CNT=113 TID=Mm.3379.2 TIER=FL+Stack STK=4 UG=Mm.3379 LL=20425<br>/UG_GENE=Shnrt1 DEF=Mus musculus, serine hydroxymethyl transferase 1 (soluble), clone MGC:14007 IMAGE:4160579, mRNA, complete<br>cds, /PROD=serine hydroxymethyl transferase 1 (soluble) /FL=gb AF237702.1 gb BC026055.1                                                                   | 459.9     | 176.8502  | 1045.8334 | 731.91003 | 1.3478124 | 2.0 | 0.31009194 | 0.37047827 |
| gb NM_010907.1 DB_XREF=gi 5754339 GEN=NR1Kb3 FEA=FLmRNA CNT=183 TID=Mm.8884.1 TIER=FL+Stack STK=97 UG=Mm.8884<br>/LL=168 DEF=Mus musculus nuclear factor of kappa light chain gene enhancer in B-cells inhibitor, alpha (Nfkbia), mRNA, /PROD=nuclear<br>factor of kappa light chain gene enhancer in B-cells inhibitor, alpha (Nfkbia) /FL=gb NM_010907.1 gb U36277.1                                   | 2398.0999 | 1137.4896 | 1406.9668 | 523.849   | 1.3708122 | 2.0 | 0.30399716 | 0.3690233  |
| gb NM_080555.1 DB_XREF=gi 18017589 GEN=Pap2b FEA=FLmRNA CNT=81 TID=Mm.29124.1 TIER=FL+Stack STK=32<br>/UG=Mm.29124 LL=67916 DEF=Mus musculus phosphatidic acid phosphatase type 2B (Pap2b), mRNA, /PROD=phosphatidic acid<br>phosphatase type 2B /FL=gb NM_080555.1 gb BC005558.1                                                                                                                        | 2908.0999 | 967.49896 | 2102.5999 | 605.9832  | 1.2221063 | 3.0 | 0.3089313  | 0.37006545 |
| gb BC026055.1 DB_XREF=gi 19913455 FEA=FLmRNA CNT=113 TID=Mm.3379.2 TIER=FL+Stack STK=4 UG=Mm.3379 LL=20425<br>/UG_GENE=Shnrt1 DEF=Mus musculus, serine hydroxymethyl transferase 1 (soluble), clone MGC:14007 IMAGE:4160579, mRNA, complete<br>cds, /PROD=serine hydroxymethyl transferase 1 (soluble) /FL=gb AF237702.1 gb BC026055.1                                                                   | 459.9     | 176.8502  | 1045.8334 | 731.91003 | 1.3478124 | 2.0 | 0.31009194 | 0.37047827 |
| gb NM_010907.1 DB_XREF=gi 5754339 GEN=NR1Kb3 FEA=FLmRNA CNT=183 TID=Mm.8884.1 TIER=FL+Stack STK=97 UG=Mm.8884<br>/LL=168 DEF=Mus musculus nuclear factor of kappa light chain gene enhancer in B-cells inhibitor, alpha (Nfkbia), mRNA, /PROD=nuclear<br>factor of kappa light chain gene enhancer in B-cells inhibitor, alpha (Nfkbia) /FL=gb NM_010907.1 gb U36277.1                                   | 2398.0999 | 1137.4896 | 1406.9668 | 523.849   | 1.3708122 | 2.0 | 0.30399716 | 0.3690233  |
| gb NM_080555.1 DB_XREF=gi 18017589 GEN=Pap2b FEA=FLmRNA CNT=81 TID=Mm.29124.1 TIER=FL+Stack STK=32<br>/UG=Mm.29124 LL=67916 DEF=Mus musculus phosphatidic acid phosphatase type 2B (Pap2b), mRNA, /PROD=phosphatidic acid<br>phosphatase type 2B /FL=gb NM_080555.1 gb BC005558.1                                                                                                                        | 2908.0999 | 967.49896 | 2102.5999 | 605.9832  | 1.2221063 | 3.0 | 0.3089313  | 0.37006545 |
| gb BC026055.1 DB_XREF=gi 19913455 FEA=FLmRNA CNT=113 TID=Mm.3379.2 TIER=FL+Stack STK=4 UG=Mm.3379 LL=20425<br>/UG_GENE=Shnrt1 DEF=Mus musculus, serine hydroxymethyl transferase 1 (soluble), clone MGC:14007 IMAGE:4160579, mRNA, complete<br>cds, /PROD=serine hydroxymethyl transferase 1 (soluble) /FL=gb AF237702.1 gb BC026055.1                                                                   | 459.9     | 176.8502  | 1045.8334 | 731.91003 | 1.3478124 | 2.0 | 0.31009194 | 0.37047827 |
| gb NM_010907.1 DB_XREF=gi 5754339 GEN=NR1Kb3 FEA=FLmRNA CNT=183 TID=Mm.8884.1 TIER=FL+Stack STK=97 UG=Mm.8884<br>/LL=168 DEF=Mus musculus nuclear factor of kappa light chain gene enhancer in B-cells inhibitor, alpha (Nfkbia), mRNA, /PROD=nuclear<br>factor of kappa light chain gene enhancer in B-cells inhibitor, alpha (Nfkbia) /FL=gb NM_010907.1 gb U36277.1                                   | 2398.0999 | 1137.4896 | 1406.9668 | 523.849   | 1.3708122 | 2.0 | 0.30399716 | 0.3690233  |
| gb NM_080555.1 DB_XREF=gi                                                                                                                                                                                                                                                                                                                                                                                |           |           |           |           |           |     |            |            |

|                                                                                                                                                                                                                                                                                                                                                                                                                                                                                                                                                               |            |           |           |           |            |     |            |            |
|---------------------------------------------------------------------------------------------------------------------------------------------------------------------------------------------------------------------------------------------------------------------------------------------------------------------------------------------------------------------------------------------------------------------------------------------------------------------------------------------------------------------------------------------------------------|------------|-----------|-----------|-----------|------------|-----|------------|------------|
| gb:NM_007657.1/DB_XREF=gi:6680893/GEN=Cd9/FEA=FLmRNA/CNT=324/TID=Mm.2956.1/TIER=FL+Stack/STK=135/UG=Mm.2956/LL=12527/DEF=Mus musculus CD9 antigen (Cd9), mRNA, /PROD=CD9 antigen /FL=gb:L08115.1 gb:NM_007657.1                                                                                                                                                                                                                                                                                                                                               | 2590.3333  | 1327.7048 | 1686.2667 | 684.79297 | 1.0481877  | 2.0 | 0.40454426 | 0.43938538 |
| gb:NM_009870.7/DB_XREF=gi:6753379/GEN=CDk4/FEA=FLmRNA/CNT=239/TID=Mm.6839.1/TIER=FL+Stack/STK=122/UG=Mm.6839/LL=1267/DEF=Mus musculus cyclin-dependent kinase 4 (Cd4), mRNA, /PROD=cyclin-dependent kinase 4 /FL=gb:L01640.1 gb:NM_009870.1                                                                                                                                                                                                                                                                                                                   | 993.26666  | 444.49567 | 694.5334  | 217.49274 | 1.0456059  | 2.0 | 0.40549216 | 0.43936384 |
| gb:AK004342.1/DB_XREF=gi:12635491/FEA=mRNA/CNT=37/TID=Mm.178550.2/TIER=Stack/STK=19/UG=Mm.178550/LL=66478/UG_GENE=2410026K10Rik/UG_TITLE=RIKEN cDNA 2410026K10 gene /DEF=Mus musculus 18 days embryo whole body cDNA, RIKEN full-length enriched library, clone:1110061M03.homolog to T-CELL SURFACE GLYCOPROTEIN E2 PRECURSOR (E2 ANTIGEN) (CD99) (MIC2 PROTEIN) (I2E7), full insert sequence.                                                                                                                                                               | 849.5334   | 656.2247  | 453.93335 | 76.852875 | 1.0370659  | 2.0 | 0.40864527 | 0.44172606 |
| gb:BC025654.1/DB_XREF=gi:19343912/FEA=FLmRNA/CNT=105/TID=Mm.25602.1/TIER=FL+Stack/STK=80/UG=Mm.25602/DEF=Mus musculus, Similar to DKFZP586L151 protein, clone MGC:35286 IMAGE:5342879, mRNA, complete cds, /PROD=Similar to DKFZP586L151 protein /FL=gb:BC025654.1                                                                                                                                                                                                                                                                                            | 1097.0668  | 515.759   | 756.93335 | 245.942   | 1.0310311  | 2.0 | 0.41088986 | 0.44309738 |
| gb:NM_019521.1/DB_XREF=gi:9506714/GEN=Gas6/FEA=FLmRNA/CNT=147/TID=Mm.3982.1/TIER=FL+Stack/STK=46/UG=Mm.3982/LL=14456/DEF=Mus musculus growth arrest specific 6 (Gas6), mRNA, /PROD=growth arrest specific 6 /FL=gb:BC005444.1 gb:NM_019521.1 gb:BC010584.1/DB_XREF=gi:14714826/FEA=FLmRNA/CNT=83/TID=Mm.219659.1/TIER=FL+Stack/STK=24/UG=Mm.219659/LL=15267/UG_GENE=Hst2/DEF=Mus musculus, H2A histone family, member O, clone MGC:5956 IMAGE:3582122, mRNA, complete cds.                                                                                    | 1537.0668  | 912.65375 | 992.8333  | 134.19629 | 1.0218685  | 2.0 | 0.41432413 | 0.44468832 |
| gb:BC015439.1/DB_XREF=gi:15830030/FEA=FLmRNA/CNT=83/TID=Mm.18814.1/TIER=FL+Stack/STK=10/UG=Mm.18814/LL=66898/UG_GENE=1300006M19Rik/DEF=Mus musculus, RIKEN cDNA 1300006M19 gene, clone MGC:8269 IMAGE:3592632, mRNA, complete cds, /PROD=RIKEN cDNA 1300006M19 gene /FL=gb:BC015439.1                                                                                                                                                                                                                                                                         | 992.26666  | 1056.4161 | 371.96667 | 48.13329  | 1.015961   | 2.0 | 0.41655517 | 0.4460284  |
| gb:NM_008788.1/DB_XREF=gi:6679220/GEN=Poolce/FEA=FLmRNA/CNT=152/TID=Mm.18808.1/TIER=FL+Stack/STK=74/UG=Mm.18808/LL=18542/DEF=Mus musculus procollagen C-proteinase enhancer protein (Poolce), mRNA, /PROD=procollagen C-proteinase enhancer protein /FL=gb:NM_008788.1                                                                                                                                                                                                                                                                                        | 3300.6667  | 1719.5554 | 2233.6333 | 697.6866  | 0.99593264 | 2.0 | 0.42421845 | 0.4531651  |
| gb:NM_007826.1/DB_XREF=gi:12841627/FEA=mRNA/CNT=37/TID=Mm.157783.14/TIER=Stack/STK=27/UG=Mm.157783/LL=104911/UG_GENE=AIB93585/UG_TITLE=expressed sequence AIB93585 /DEF=Mus musculus, 10 day old male pancreas cDNA, RIKEN full-length enriched library, clone:1810048H17.immunoglobulin heavy chain, (J558 family), full insert sequence.                                                                                                                                                                                                                    | 536.60004  | 343.23163 | 1281.9667 | 1260.6519 | 0.98811466 | 2.0 | 0.42725167 | 0.45533392 |
| gb:NM_010890.1/DB_XREF=gi:13994148/GEN=Nedd3a4/FEA=FLmRNA/CNT=23/TID=Mm.16553.1/TIER=FL/STK=17/UG=Mm.16553/LL=17999/DEF=Mus musculus neural precursor cell expressed, developmentally down-regulated gene 4a (Nedd4), mRNA, /PROD=neural precursor cell expressed, developmentally down-regulated gene 4a /FL=gb:NM_010890.1                                                                                                                                                                                                                                  | 1768.7333  | 992.5988  | 1140.6    | 479.7904  | 0.98683304 | 2.0 | 0.42775115 | 0.45479864 |
| gb:BC025131.1/DB_XREF=gi:19264044/FEA=FLmRNA/CNT=81/TID=Mm.41931.1/TIER=FL+Stack/STK=23/UG=Mm.41931/LL=50530/UG_GENE=Mtaps-pending /DEF=Mus musculus, Similar to microfibrillar associated protein 5, clone MGC:35969 IMAGE:3982519, mRNA, complete cds, /PROD=Similar to microfibrillar associated protein 5 /FL=gb:AF180805.1 gb:NM_015776.1 gb:BC025131.1                                                                                                                                                                                                  | 4995.033   | 2107.182  | 3669.4668 | 1422.718  | 0.9030253  | 3.0 | 0.43307415 | 0.45938239 |
| gb:NM_013472.1/DB_XREF=gi:7304890/GEN=Anxa6/FEA=FLmRNA/CNT=413/TID=Mm.22619.1/TIER=FL+Stack/STK=233/UG=Mm.22619/LL=11749/DEF=Mus musculus annexin A6 (Anxa6), mRNA, /PROD=annexin A6 /FL=gb:NM_013472.1 gb:BC005595.1 gb:BC019775.1/DB_XREF=gi:18043602/FEA=FLmRNA/CNT=156/TID=Mm.214514.1/TIER=FL+Stack/STK=98/UG=Mm.214514/LL=116847/UG_GENE=Prep /DEF=Mus musculus, proline arginine-rich end leucine-rich repeat, clone MGC:52825 IMAGE:4165772, mRNA, complete cds, /PROD=proline arginine-rich end leucine-rich repeat /FL=gb:BC019775.1 gb:NM_054077.1 | 2057.4666  | 881.61163 | 1507.8334 | 424.67703 | 0.97284544 | 2.0 | 0.43324443 | 0.45849165 |
| gb:NM_032541.1/DB_XREF=gi:14221154/GEN=Hamp/FEA=FLmRNA/CNT=18/TID=Mm.23995.1/TIER=FL+Stack/STK=12/UG=Mm.23995/LL=84506/DEF=Mus musculus, hepcidin antimicrobial peptide (Hamp), mRNA, /PROD=hepcidin antimicrobial peptide /FL=gb:NM_032541.1 gb:AF297664.1 gb:BC021587.1                                                                                                                                                                                                                                                                                     | 4090.6667  | 2158.8376 | 2871.2    | 441.99368 | 0.95850414 | 2.0 | 0.43895587 | 0.46238044 |
| gb:AK008203.1/DB_XREF=gi:12842246/FEA=FLmRNA/CNT=83/TID=Mm.18814.1/TIER=Stack/STK=25/UG=Mm.18814/LL=66898/UG_GENE=1300006M19Rik/UG_TITLE=RIKEN cDNA 130006M19 gene /DEF=Mus musculus adult male intestine cDNA, RIKEN full-length enriched library, clone:2010012D17.homolog to INSULIN RECEPTOR TYROSINE KINASE SUBSTRATE, full insert sequence.                                                                                                                                                                                                             | 2052.7     | 2641.6304 | 592.10004 | 181.3516  | 0.95542985 | 2.0 | 0.4401908  | 0.46260792 |
| gb:BC015459.1/DB_XREF=gi:13933834/FEA=FLmRNA/CNT=521/TID=Mm.140785.1/TIER=FL+Stack/STK=158/UG=Mm.140785/LL=140785/UG_GENE=20249/UG_GENE=Scd1/DEF=Mus musculus, steroyl-Coenzyme A desaturase 1, clone MGC:6427 IMAGE:3599932, mRNA, complete cds, /PROD=steroyl-Coenzyme A desaturase 1 /FL=gb:BC007474.1 gb:NM_009127.1                                                                                                                                                                                                                                      | 6781.533   | 901.3425  | 11328.734 | 8234.607  | 0.95077056 | 2.0 | 0.44206956 | 0.46350944 |
| gb:BC025161.1/DB_XREF=gi:19263792/FEA=FLmRNA/CNT=98/TID=Mm.29503.1/TIER=FL+Stack/STK=47/UG=Mm.29503/LL=68479/UG_GENE=111000780Rik/DEF=Mus musculus, hypothetical protein MGC1346, clone MGC:36856 IMAGE:4235469, mRNA, complete cds, /PROD=hypothetical protein MGC1346 /FL=gb:BC025161.1                                                                                                                                                                                                                                                                     | 990.4001   | 521.377   | 693.3333  | 156.94771 | 0.94498926 | 2.0 | 0.4444127  | 0.46489254 |
| gb:NM_013550.1/DB_XREF=gi:7305140/GEN=Hist4/FEA=FLmRNA/CNT=9/TID=Mm.193557.1/TIER=FL/STK=1/UG=Mm.193557/LL=15269/DEF=Mus musculus histone 4 protein (Hist4), mRNA, /PROD=histone 4 protein /FL=gb:NM_013550.1                                                                                                                                                                                                                                                                                                                                                 | 2056.1667  | 1616.3438 | 1194.2001 | 14.616449 | 0.9236334  | 2.0 | 0.45318398 | 0.4729782  |
| gb:NM_019427.1/DB_XREF=gi:14221154/GEN=Hamp/FEA=FLmRNA/CNT=18/TID=Mm.23995.1/TIER=FL+Stack/STK=12/UG=Mm.23995/LL=84506/DEF=Mus musculus, hepcidin antimicrobial peptide (Hamp), mRNA, /PROD=hepcidin antimicrobial peptide /FL=gb:NM_019427.1 gb:AF297664.1 gb:BC021587.1                                                                                                                                                                                                                                                                                     | 1015.76666 | 444.64703 | 1562.2001 | 960.1859  | 0.8944442  | 2.0 | 0.46547025 | 0.48468689 |
| gb:AK011936.1/DB_XREF=gi:12849366/FEA=mRNA/CNT=86/TID=Mm.203875.1/TIER=Stack/STK=50/UG=Mm.203875/LL=72478/UG_GENE=2610209L21Rik/UG_TITLE=RIKEN cDNA 2610209L21 gene /DEF=Mus musculus 10 days embryo whole body cDNA, RIKEN full-length enriched library, clone:2610209L21.unclassifiable transcript, full insert sequence.                                                                                                                                                                                                                                   | 1655.0     | 803.78375 | 1204.4667 | 482.45084 | 0.8324072  | 3.0 | 0.4662473  | 0.48438507 |
| gb:NM_010664.1/DB_XREF=gi:6754481/GEN=Krt18/FEA=FLmRNA/CNT=380/TID=Mm.22479.1/TIER=FL+Stack/STK=149/UG=Mm.22479/LL=16689/DEF=Mus musculus keratin complex 1, acidic, gene 18 (Krt1-18), mRNA, /PROD=keratin complex 1, acidic, gene 18 /FL=gb:M36376.1 gb:NM_010664.1 gb:M11686.1                                                                                                                                                                                                                                                                             | 497.56665  | 1510.219  | 883.39996 | 751.11115 | 0.8897052  | 2.0 | 0.46749777 | 0.48457533 |
| gb:BB204720/DB_XREF=gi:16351882/DB_XREF=BB204720/CLONE=AA30059G22/FEA=FLmRNA/CNT=74/TID=Mm.182434.2/TIER=Stack/STK=16/UG=Mm.182434/UG_TITLE=Mus musculus, Similar to RIKEN cDNA 1700066C05 gene, clone MGC:28125 IMAGE:3980327, mRNA, complete cds /FL=gb:BC020078.1                                                                                                                                                                                                                                                                                          | 416.06668  | 181.6803  | 901.2     | 929.3317  | 0.88737375 | 2.0 | 0.4684986  | 0.48450652 |
| gb:NM_009156.1/DB_XREF=gi:6677916/GEN=Sepw1/FEA=FLmRNA/CNT=217/TID=Mm.42829.1/TIER=FL+Stack/STK=83/UG=Mm.42829/LL=20364/DEF=Mus musculus selenoprotein W, muscle 1 (Sepw1), mRNA, /PROD=selenoprotein W, muscle 1 /FL=gb:U67890.1 gb:A241527.2 gb:AF015284.1 gb:NM_009156.1                                                                                                                                                                                                                                                                                   | 2498.2     | 1507.5862 | 1717.6    | 341.65616 | 0.8746445  | 2.0 | 0.4740024  | 0.48908427 |
| gb:NM_134051.1/DB_XREF=gi:19267267/FEA=FLmRNA/CNT=3/TID=Mm.157783.1/TIER=FL/STK=2/UG=Mm.157783/LL=104911/DEF=Mus musculus expressed sequence AIB93585 (AIB93585), mRNA, /PROD=expressed sequence AIB93585 /FL=gb:NM_134051.1 gb:BC013488.1                                                                                                                                                                                                                                                                                                                    | 1823.8334  | 1609.4973 | 5154.1665 | 6440.4775 | 0.8689117  | 2.0 | 0.47650295 | 0.49054953 |
| gb:BC019425.1/DB_XREF=gi:18043870/FEA=FLmRNA/CNT=5/TID=Mm.157783.67/TIER=FL/STK=1/UG=Mm.157783/LL=104911/UG_GENE=AIB93585/DEF=Mus musculus, clone MGC:30346 IMAGE:4459683, mRNA, complete cds, /PROD=Unknown (protein for MGC:30346) /FL=gb:BC019425.1                                                                                                                                                                                                                                                                                                        | 893.8333   | 797.18445 | 2621.0002 | 3428.4812 | 0.8498838  | 2.0 | 0.48490024 | 0.49806497 |
| gb:NM_032541.1/DB_XREF=gi:14221154/GEN=Hamp/FEA=FLmRNA/CNT=18/TID=Mm.23995.1/TIER=FL+Stack/STK=12/UG=Mm.23995/LL=84506/DEF=Mus musculus hepcidin antimicrobial peptide (Hamp), mRNA, /PROD=hepcidin antimicrobial peptide /FL=gb:NM_032541.1 gb:AF297664.1 gb:BC021587.1                                                                                                                                                                                                                                                                                      | 3380.7666  | 2024.4442 | 2395.367  | 236.9967  | 0.8373586  | 2.0 | 0.4905101  | 0.5026898  |
| gb:AK017926.1/DB_XREF=gi:12857423/FEA=mRNA/CNT=124/TID=Mm.21697.1/TIER=Stack/STK=56/UG=Mm.21697/LL=74747/UG_GENE=5830413E08Rik/UG_TITLE=RIKEN cDNA 5830413E08 gene /DEF=Mus musculus adult male thymus cDNA, RIKEN full-length enriched library, clone:5830413E08.homolog to HYPOTHETICAL 25.4 KDA PROTEIN, full insert sequence.                                                                                                                                                                                                                             | 2388.0667  | 451.77954 | 1741.9    | 1306.4413 | 0.8096306  | 2.0 | 0.50316334 | 0.51449585 |
| gb:NM_017370.1/DB_XREF=gi:8850218/GEN=Hpf/FEA=FLmRNA/CNT=154/TID=Mm.26730.1/TIER=FL+Stack/STK=33/UG=Mm.26730/LL=15439/DEF=Mus musculus haptoglobin (Hp), mRNA, /PROD=haptoglobin /FL=gb:NM_017370.1 gb:M96827.1                                                                                                                                                                                                                                                                                                                                               | 705.19995  | 506.99698 | 440.69998 | 253.31256 | 0.8083316  | 2.0 | 0.5037641  | 0.51395255 |
| gb:AF127033.1/DB_XREF=gi:9937096/FEA=FLmRNA/CNT=402/TID=Mm.3760.1/TIER=FL+Stack/STK=97/UG=Mm.3760/LL=14104/UG_GENE=Fasn/DEF=Mus musculus fatty acid synthase mRNA, complete cds, /PROD=fatty acid synthase /FL=gb:AF127033.1                                                                                                                                                                                                                                                                                                                                  | 1379.7334  | 459.9069  | 2322.4333 | 1995.7894 | 0.797231   | 2.0 | 0.5089267  | 0.51805544 |
| gb:NM_010180.1/DB_XREF=gi:6753821/GEN=Fbn1/FEA=FLmRNA/CNT=91/TID=Mm.219663.1/TIER=FL+Stack/STK=41/UG=Mm.219663/LL=14114/DEF=Mus musculus fibulin 1 (Fbn1), mRNA, /PROD=fibulin 1 /FL=gb:NM_010180.1                                                                                                                                                                                                                                                                                                                                                           | 835.6333   | 728.61206 | 505.8666  | 168.10336 | 0.76385224 | 2.0 | 0.52476585 | 0.53298366 |
| gb:NM_009052.1/DB_XREF=gi:6677720/GEN=Rea3/FEA=FLmRNA/CNT=77/TID=Mm.14768.1/TIER=FL+Stack/STK=56/UG=Mm.14768/LL=19716/DEF=Mus musculus reduced expression 3 (Rea3), mRNA, /PROD=reduced expression 3 /FL=gb:AF051347.1 gb:NM_009052.1 gb:AF097438.1                                                                                                                                                                                                                                                                                                           | 1297.2999  | 1452.1323 | 657.06665 | 84.7658   | 0.76234937 | 2.0 | 0.5254902  | 0.53252804 |
| gb:AK010307.1/DB_XREF=gi:12845853/FEA=mRNA/CNT=161/TID=Mm.3014.1/TIER=ConsEnd/STK=0/UG=Mm.3014/LL=66386/UG_GENE=2310039H15Rik/UG_TITLE=RIKEN cDNA 2310039H15 gene /DEF=Mus musculus ES cells cDNA, RIKEN full-length enriched library, clone:2810470K21Rik.homolog to ACYL CARRIER PROTEIN, MITOCHONDRIAL PRECURSOR (ACP) (NADH-UBIQUINONE OXIDOREDUCTASE 9.6 KDA SUBUNIT) (EC 1.6.5.3) (EC 1.6.99.3) (CI-SADP), full insert sequ...                                                                                                                          | 1906.5     | 288.7541  | 2880.9336 | 2196.1677 | 0.7619484  | 2.0 | 0.5256836  | 0.53153753 |
| gb:NM_021400.1/DB_XREF=gi:10946747/GEN=Prg4/FEA=FLmRNA/CNT=10/TID=Mm.212696.1/TIER=FL/STK=6/UG=Mm.212696/LL=65022/DEF=Mus musculus proteoglycan 4 (megakaryocyte stimulating factor, articular superficial zone protein) (Prg4), mRNA, /PROD=proteoglycan 4 (megakaryocyte stimulating factor, articular superficial zone protein) /FL=gb:AB034730.1 gb:NM_021400.1                                                                                                                                                                                           | 2187.3333  | 1512.217  | 1530.1998 | 243.50616 | 0.74308985 | 2.0 | 0.5348581  | 0.5396124  |
| gb:BC021831.1/DB_XREF=gi:16256103/FEA=mRNA/CNT=7/TID=Mm.218360.1/TIER=ConsEnd/STK=0/UG=Mm.218360/DEF=Mus musculus, clone IMAGE:3983821, mRNA, partial cds, /PROD=Unknown (protein for IMAGE:3983821)                                                                                                                                                                                                                                                                                                                                                          | 828.2      | 179.45923 | 1305.7333 | 1128.0948 | 0.72408855 | 2.0 | 0.54425615 | 0.5478765  |
| gb:NM_008979.2/DB_XREF=gi:15638941/GEN=Cdv1/FEA=FLmRNA/CNT=48/TID=Mm.10125.1/TIER=FL+Stack/STK=11/UG=Mm.10125/LL=12589/DEF=Mus musculus carnitine deficiency-associated gene expressed in ventricle 1 (Cdv1), mRNA, /PROD=carnitine deficiency-associated gene expressed in ventricle 1 /FL=gb:AF354757.1 gb:NM_008979.2                                                                                                                                                                                                                                      | 2408.5     | 1793.4084 | 1702.0    | 263.94318 | 0.6750568  | 2.0 | 0.569223   | 0.57174164 |
| gb:BC025093.1/DB_XREF=gi:19263816/FEA=FLmRNA/CNT=37/TID=Mm.11480.2/TIER=FL/STK=1/UG=Mm.11480/LL=67239/UG_GENE=2810470K21Rik/DEF=Mus musculus, RIKEN cDNA 2810470K21 gene, clone MGC:35797 IMAGE:4009314, mRNA, complete cds, /PROD=RIKEN cDNA 2810470K21 gene /FL=gb:BC025093.1                                                                                                                                                                                                                                                                               | 1150.7666  | 101.20684 | 2018.6    | 2279.5244 | 0.6587568  | 2.0 | 0.5777513  | 0.57902664 |
| gb:NM_054037.1/DB_XREF=gi:16905068/GEN=Scg3a1/FEA=FLmRNA/CNT=13/TID=Mm.22802.1/TIER=FL/STK=7/UG=Mm.22802/LL=68662/DEF=Mus musculus secretoglobulin, family 3A, member 1 (Scg3a1), mRNA, /PROD=UGRP2 type A /FL=gb:NM_054037.1 gb:AF313456.1                                                                                                                                                                                                                                                                                                                   | 6362.733   | 6998.1064 | 3526.5332 | 5637.334  | 0.5466609  | 3.0 | 0.62264764 | 0.62264764 |
