# Supplementary material for: Protein Phosphatase 2A Improves Cardiac Functional Response to Ischemia and Sepsis
Source: Int J Mol Sci. 2022 Apr 23;23(9):4688. doi: 10.3390/ijms23094688 (PMC9101092; doi:10.3390/ijms23094688)
Supplement: Supplementary file 1 [file ijms-23-04688-s001.zip]

Archive with 4 entries (4 files):
- Supplementary figures S1-S7.pdf
- Supplementary Table S1.pdf
- Supplementary Table S2.pdf
- Supplementary Table S3.pdf
